# Supplementary material for: Biocatalytic synthesis of ribonucleoside analogues using nucleoside transglycosylase-2
Source: Royal Society of Chemistry journal article supplement (doi:10.1039/d4sc07521h), 2024-12-11
Supplement: d4sc07521h1.pdf [file d4sc07521h1.pdf]

## Supplementary Information

### Biocatalytic Synthesis of Ribonucleoside Analogues Using Nucleoside Transglycosylase-2

Admir Salihovic,<sup>[a,b]</sup> Alex Ascham,<sup>[c]</sup> Petja S. Rosenqvist,<sup>[d]</sup> Andrea Taladriz-Sender,<sup>[a,b]</sup> Paul A. Hoskisson,<sup>[e]</sup> David R.W. Hodgson,<sup>[d]</sup> Gideon Grogan,<sup>[c]\*</sup> Glenn A. Burley<sup>[a,b]\*</sup>

<sup>[a]</sup> Department of Pure & Applied Chemistry, University of Strathclyde, 295 Cathedral Street, Glasgow, United Kingdom G1 1XL. <sup>[b]</sup> Strathclyde Centre for Molecular Bioscience, University of Strathclyde. <sup>[c]</sup> Department of Chemistry, University of York, Heslington, York, United Kingdom, YO10 5DD. <sup>[d]</sup> Department of Chemistry, Durham University, South Road, Durham, United Kingdom, DH1 3LE. <sup>[e]</sup> Strathclyde Institute of Pharmacy & Biomedical Sciences, University of Strathclyde, 161 Cathedral Street, Glasgow, G4 0RE, United Kingdom.

1. General Information S2-S3
  - 1.1 Reagents and solvents
  - 1.2 NMR spectroscopy
  - 1.3 LC-MS
  - 1.4 HPLC
2. General experimental techniques and procedures S3-S7
  - 2.1 Preparation of stock solutions
  - 2.2 General procedures
  - 2.3 Analytical RP-HPLC method parameters
  - 2.4 RP-HPLC semi preparatory method parameters
3. Reaction scope of transglycosylation using ribonucleoside analogues S7-S23
  - 3.1 Characterisation of scaled up nucleosides
  - 3.2 Characterisation of nucleosides prepared on a smaller scale
  - 3.3 Characterisation of 2' Fluoro Nucleoside Analogues
4. Protein Expression and Crystallisation S23-S30
  - 4.1 Expression
  - 4.2 Purification of NDT-WT
  - 4.3 Purification of NDT-Y7F/D72N
  - 4.4 Crystallisation
  - 4.5 Data Collection and Refinement
5. Mutant NDT-Y7F/D72N transglycosylation conversions S30

## 5.1 Ribose transglycosylations using Mutant NDT-Y7F/D72N

6. Synthesis of 2' and 3' modified nucleosides for substrate scope transglycosylation investigations S31-S37
  - 6.1 Synthesis of 2',3' -dideoxy-3'-thiothymidine (31)
  - 6.2 Synthesis of 2'-amino-2',3'-dideoxyuridine (32)
  - 6.3 Synthesis of 2'-amino-2'-deoxyuridine (33)
7. Appendix S37 – S117
8. References S117 – S178

## 1. General information

### 1.1 Reagents and Solvents

All reagents and solvents were used as supplied from commercial sources and used without any further purification unless otherwise specified. Solvents were all HPLC grade and used without any further purification, unless otherwise specified. Thin layer chromatography (TLC) was performed using Merck silica plates coated with fluorescent indicator UV254. TLC plates were analysed under 254 nm UV light or developed in p-Anisaldehyde. Normal-phase column chromatography was carried out using Fluorochem Silicagel 60 Å 40-63 µm. Normal phase auto column chromatography was carried out using Silicycle silicagel on an interchim puriflash XS520 plus.

### 1.2 NMR Spectroscopy

NMR spectroscopy was carried out using a Bruker 400 UltraShield™ “Avance I” spectrometer and Bruker Avance III-HD-400 and Varian VNMRs-600 spectrometer. All chemical shifts ( $\delta$ ) in CDCl<sub>3</sub> were referenced at 7.26 ppm (<sup>1</sup>H) and 77.16 ppm (<sup>13</sup>C), in (CD<sub>3</sub>)<sub>2</sub>SO at 2.50 ppm (<sup>1</sup>H) and 39.52 ppm (<sup>13</sup>C), in CD<sub>3</sub>CN at 1.94 ppm (<sup>1</sup>H) and 118.26 ppm (<sup>13</sup>C), in D<sub>2</sub>O at 4.79 ppm (<sup>1</sup>H), and in CD<sub>3</sub>OD at 3.31 ppm (<sup>1</sup>H) and 49.00 ppm (<sup>13</sup>C). Chemical shifts are reported in parts per million (ppm) and coupling constants are quoted in hertz (Hz). Abbreviations for splitting patterns are s (singlet), d (doublet), t (triplet), q (quartet) and m (multiplet). App (apparent) denotes signals in which similar *J* values have resulted in false equivalence. All NMR data was processed using MestRenova 11.0.3 software.

### 1.3 Liquid Chromatography-Mass Spectrometry (LC-MS)

LC-MS was carried out on an Agilent 1200 series HPLC instrument in conjunction with an Agilent Quadrupole mass detector 9 (HPLC Agilent Technologies 6130 Quadrupole), using an agilent Infinity Lab Poroshell 120, 4.6 x 100 mm, 2.7  $\mu$  C18 column. A combination of electrospray ionization (ESI) and atmospheric pressure chemical ionization (APCI) was used in all cases (MM-ES+APCI). The solvent system used was Acetonitrile/Water with 5 mM Ammonium Acetate buffer pH 7.0.

#### **1.4 High-Pressure Liquid Chromatography (HPLC)**

HPLC analysis was performed on a Dionex Ultimate 300 instrument utilising the VWD3400 variable wavelength detector. Analytical reversed-phase HPLC (RP-HPLC) was carried out on a Shimadzu Prominence instrument utilising a PDA Detector scanning from 190-600 nm. Semi-preparative RP-HPLC purification was carried out on a Dionex Ultimate 3000 series instrument using a 150 x 21.2 mm Kinetex 5  $\mu$ m C18 column.

## **2. General experimental techniques and procedures**

### **2.1 Preparation of stock solutions**

#### **100 mM Phosphate buffer solution pH 6**

$\text{Na}_2\text{HPO}_4 \cdot 7\text{H}_2\text{O}$  (1.84 g) and  $\text{NaH}_2\text{PO}_4 \cdot \text{H}_2\text{O}$  (5.96 g) were dissolved in 500 mL of mQ  $\text{H}_2\text{O}$ , adjusted using 0.2 mL of 1M HCl obtaining a final pH of 6.

#### **10 mM Phosphate buffer solution pH 7**

$\text{Na}_2\text{HPO}_4 \cdot 7\text{H}_2\text{O}$  (1.549 g) and  $\text{NaH}_2\text{PO}_4 \cdot \text{H}_2\text{O}$  (0.582 g) were dissolved in 1 L of mQ  $\text{H}_2\text{O}$ , adjusted using 0.2 mL of 1M HCl obtaining a final pH of 7.

#### **Preparation of stock solutions of nucleoside donors**

5-Methyluridine **7** (775 mg) was dissolved in 30 mL of mQ  $\text{H}_2\text{O}$  to prepare a 100 mM solution. Solution was shaken by hand for 1 min to ensure full solubility of 5-methyluridine.

Cytidine **8** (730 mg) was dissolved in 30 mL of mQ  $\text{H}_2\text{O}$  to prepare a 100 mM solution. Solution was shaken for 1 min to ensure full solubility of cytidine.

Sugar donor stock solutions were stored at rt.

## Preparation of stock solutions of nucleobase acceptors

As an example, 26 mg of 6-bromo-deazapurine were dissolved by sonication in 2626  $\mu\text{L}$  of chosen solvent to form a 50 mM solution. Nucleobase solution was stored at rt.

## Preparation of stock solutions of L/NDT

*Lactobacillus Leichmanii* NDT (L/NDT, N2665 Sigma-Aldrich, expressed in *E. coli*) stock solution was prepared by dissolving 0.921 mg of powder enzyme in 0.921  $\mu\text{L}$  of 100 mM  $\text{Na}_2\text{HPO}_4$  pH 7 and 20% glycerol (1 mg/mL). Solution stored in  $-18^\circ\text{C}$ .

## 2.2 General Procedures

### General Enzymatic Nucleoside Transglycosylation Procedure

A 50 mM nucleobase stock solution in mQ  $\text{H}_2\text{O}$  (10.0  $\mu\text{mol}$ , 200  $\mu\text{L}$ , 1 equiv) was mixed with a 100 mM 5-methyluridine or cytidine solution dissolved in mQ  $\text{H}_2\text{O}$  (50.0  $\mu\text{mol}$ , 500  $\mu\text{L}$ , 5 equiv) Next, 100  $\mu\text{L}$  of NDT stock solution (0.1 mg/mL) were added as well as 200  $\mu\text{L}$  extra of mQ  $\text{H}_2\text{O}$  to afford a final reaction volume of 1 mL. The resulting reaction mixture was shaken at 950 rpm at  $40^\circ\text{C}$  for 24 h. Then, an aliquot of 100  $\mu\text{L}$  of reaction mixture was transferred to a 1 mL HPLC vial, quenched with 100  $\mu\text{L}$  of HFIP or Proteinase K (5 mg/mL) and diluted with 800  $\mu\text{L}$  of 100 mM  $\text{Na}_2\text{HPO}_4$  buffer. The crude was analysed by analytical RP-HPLC, and conversion of the target nucleoside was calculated by monitoring the ratio of the peak area of starting material to peak area of product. Reactions were carried out in triplicate and conversions were expressed as the average with the corresponding standard deviation.

## 2.3 Analytical RP-HPLC method parameters

### Method A

Column specification: Luna C18 Polar Omega 3  $\mu$  (100 x 4.6 mm)

Column temperature:  $40^\circ\text{C}$

Mobile phase A: 0.1% v/v TFA in water

Mobile phase B: 0.1% v/v TFA in Acetonitrile

Flow rate 1.5 mL/min

Gradient profile:

| Time (min) | % A | % B |
|------------|-----|-----|
| 0          | 99  | 1   |
| 0.5        | 99  | 1   |
| 4          | 88  | 12  |
| 6.5        | 50  | 50  |
| 7          | 5   | 95  |
| 8          | 5   | 95  |
| 9          | 99  | 1   |
| 11.30      | 99  | 1   |

Detection wavelength of 254 nm.

### Method B

Column specification: Luna C18 Polar Omega 3  $\mu$  (100 x 4.6 mm)

Column temperature: 40 °C

Mobile phase A: 0.1% v/v TFA in water

Mobile phase D: Acetonitrile

Flow rate 1.5 mL/min

Gradient profile:

| Time (min) | % A | % D |
|------------|-----|-----|
| 0          | 95  | 5   |
| 8          | 40  | 60  |
| 8.5        | 5   | 95  |
| 11         | 5   | 95  |
| 11.5       | 95  | 5   |
| 14         | 95  | 5   |

Detection wavelength of 254 nm.

### Method C

Column specification: Phenomenex Luna C18 3  $\mu$  phenyl-hexyl (150 x 4.6 mm)

Column temperature: 40 °C

Mobile phase A: 0.1% v/v TFA in water

Mobile phase B: 0.1% v/v TFA in Acetonitrile

Flow rate 1.2 mL/min

Gradient profile:

| Time (min) | % A | % B |
|------------|-----|-----|
| 0          | 99  | 1   |

|    |    |    |
|----|----|----|
| 8  | 70 | 30 |
| 9  | 5  | 95 |
| 11 | 5  | 95 |
| 11 | 99 | 1  |
| 13 | 99 | 1  |

Detection wavelength of 254 nm.

## 2.4 RP-HPLC semi preparatory method parameters:

### Method D

Column specification: Kinetex 5  $\mu\text{m}$  XB-C18 100 Å, 150 x 21.2 mm

Column temperature: 40 °C

Mobile phase A: Water

Mobile phase B: Acetonitrile

Flow rate: 12 mL/min

| Time (min) | % A | % B |
|------------|-----|-----|
| 0          | 95  | 5   |
| 18         | 82  | 18  |
| 19         | 5   | 95  |
| 23         | 5   | 95  |
| 24         | 95  | 5   |
| 28         | 95  | 5   |

Detection wavelength of 254 nm.

## 3. Ribose scope characterisation

### 3.1 Scaled up preparation of ribonucleosides

#### 6-bromo-1-deaza-ribose-5-phosphate (10)

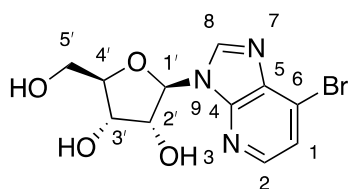

Cytidine **8** (1.22 g, 5.0 mmol, 5 equiv) and 6-bromo-deazapurine **9** (198 mg, 1.0 mmol, 1 equiv) were dissolved in 5 mL of mQ H<sub>2</sub>O. The solution was left stirring for an hour at 40 °C followed by addition of 5 mL of *LINDT* (from a 1 mg/mL stock solution). The reaction was stirred for 72 h at 40 °C. The crude residue was concentrated *in vacuo*, dry loaded onto silica and purified

by flash column chromatography (silica gel, 0-20% CH<sub>2</sub>Cl<sub>2</sub>/MeOH) to obtain the nucleoside **10** in 67% yield as a brown solid (220 mg, 0.67 mmol).

**<sup>1</sup>H NMR** (400 MHz, (CD<sub>3</sub>)<sub>2</sub>SO, ppm) δ 8.82 (s, 1H, H<sup>8</sup>), 8.25 (d, J = 5.2 Hz, 1H, H<sup>2</sup>), 7.63 (d, J = 5.2 Hz, 1H, H<sup>1</sup>), 6.06 (d, J = 5.6 Hz, 1H, H<sup>1'</sup>), 5.50 (d, J = 6.0 Hz, 1H, OH<sup>2'</sup>), 5.20 (d, J = 5.0 Hz, 1H, OH<sup>3'</sup>), 5.14 (dd, J = 6.2, 5.0 Hz, 1H, OH<sup>5'</sup>), 4.63 (app q, J = 5.6 Hz, 1H, H<sup>2'</sup>), 4.19 (app td, J = 4.9, 3.7 Hz, 1H, H<sup>3'</sup>), 3.98 (app q, J = 3.8 Hz, 1H, H<sup>4'</sup>), 3.70 (ddd, J = 12.0, 5.0, 3.9 Hz, 1H, H<sup>5'</sup> or H<sup>5''</sup>), 3.58 (ddd, J = 12.0, 6.2, 3.9 Hz, 1H H<sup>5'</sup> or H<sup>5''</sup>)

**<sup>13</sup>C{<sup>1</sup>H}-NMR** (101 MHz, (CD<sub>3</sub>)<sub>2</sub>SO, ppm) δ 146.4(C<sup>4</sup>), 144.6(C<sup>8</sup>), 144.4(C<sup>2</sup>), 134.8(C<sup>5</sup>), 123.2(C<sup>6</sup>), 121.8(C<sup>1</sup>), 87.9(C<sup>1'</sup>), 85.5(C<sup>4'</sup>), 73.6(C<sup>2'</sup>), 70.3(C<sup>3'</sup>), 61.3(C<sup>5'</sup>).

**RP-HPLC** (Method A): t<sub>R</sub> = 6.09 min, 75% conversion.

**HRMS** (ESI) *m/z*: [M+Na]<sup>+</sup> calcd for C<sub>11</sub>H<sub>12</sub><sup>79</sup>BrN<sub>3</sub>O<sub>4</sub>Na 351.9903; found 351.9906.

### 5-iodo-uridine (**18**)

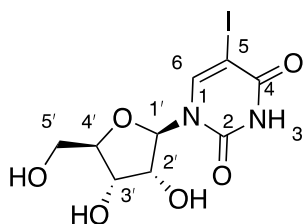

Cytidine **7** (2.43 g, 10.0 mmol, 10 equiv) and 5-iodouracil **17** (238 mg, 1.0 mmol, 1 equiv) were dissolved in 5 mL of mQ H<sub>2</sub>O. The solution was left stirring for an hour at 40 °C followed by addition of 5 mL of *LINDT* (from a 1 mg/mL stock solution). The reaction was stirred for 72 h at 40 °C. The crude residue was concentrated *in vacuo*, dry loaded onto silica and purified by flash column chromatography (silica gel, 0-30% CH<sub>2</sub>Cl<sub>2</sub>/MeOH) to obtain the nucleoside **18** in 27% yield as a white solid (100 mg, 0.27 mmol).

**<sup>1</sup>H NMR** (400 MHz, (CD<sub>3</sub>)<sub>2</sub>SO, ppm) δ 11.67 (s, 1H, NH), 8.48 (s, 1H, H<sup>6</sup>), 5.73 (d, J = 4.6 Hz, 1H, H<sup>1'</sup>), 5.40 (d, J = 5.4 Hz, 1H, OH<sup>2'</sup>), 5.25 (t, J = 4.7 Hz, 1H, OH<sup>5'</sup>), 5.06 (d, J = 5.3 Hz, 1H, OH<sup>3'</sup>), 4.04 (app q, J = 5.0 Hz, 1H, H<sup>2'</sup>), 3.99 (app q, J = 4.9 Hz, 1H H<sup>3'</sup>), 3.87 (app dt, J = 4.9, 2.8 Hz, 1H, H<sup>4'</sup>), 3.68 (ddd, J = 12.0, 4.8, 2.9 Hz, 1H H<sup>5'</sup> or H<sup>5''</sup>), 3.57 (ddd, J = 12.0, 4.7, 2.7 Hz, 1H H<sup>5'</sup> or H<sup>5''</sup>).

**<sup>13</sup>C{<sup>1</sup>H}-NMR** (101 MHz, (CD<sub>3</sub>)<sub>2</sub>SO, ppm) δ 160.4(C<sup>4</sup>), 150.3(C<sup>5</sup>), 145.1(C<sup>6</sup>), 88.3(C<sup>1'</sup>), 84.7(C<sup>4'</sup>), 73.9(C<sup>2'</sup>), 69.3(C<sup>3'</sup>), 69.2 (C<sup>2</sup>), 60.2(C<sup>5'</sup>).

NMR values in agreement with literature.<sup>1</sup>

**RP-HPLC** (Method A):  $t_R = 3.49$  min, 31 % conversion.

**HRMS** (ESI)  $m/z$ :  $[M+Na]^+$  calcd for  $C_9H_{11}N_2O_6Na$  392.9554; found, 392.9545.

### 3.2 Small scale

#### 6-bromo-1-deaza-ribosyl-purine (**10**)

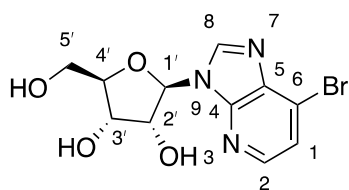

Prepared using the general enzymatic nucleoside transglycosylation procedure A. A 50 mM nucleobase stock solution (15 mg dissolved in 1515  $\mu$ L) in DMSO (10.0  $\mu$ mol, 200  $\mu$ L, 1 equiv) was mixed with a 100 mM cytidine solution (243 mg in 10 mL), which was dissolved in mQ  $H_2O$  (50.0  $\mu$ mol, 500  $\mu$ L, 5 equiv). Next, 100  $\mu$ L of NDT stock solution (0.1 mg/mL) was added alongside 200  $\mu$ L of mQ  $H_2O$  to afford a final volume of 1 mL and the resulting reaction mixture was shaken at 950 rpm at 40  $^{\circ}C$  for 24 h. The crude reaction mixture was purified by preparative HPLC (method D) affording the target nucleoside **10**.

**RP-HPLC** (Method A):  $t_R = 6.09$  min, 96% conversion (std = 1).

Characterisation of the target nucleoside was confirmed through  $^1H$  NMR in comparison with the large-scale characterisation.

#### 6-chloro-1-deaza-ribosyl-purine (**11**)

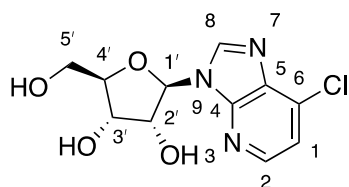

Prepared using the general enzymatic nucleoside transglycosylation procedure A. A 50 mM nucleobase stock solution (9.6 mg dissolved in 1250  $\mu$ L) in mQ  $H_2O$  (10.0  $\mu$ mol, 200  $\mu$ L, 1 equiv) was mixed with a 100 mM cytidine solution (243 mg in 10 mL), which was dissolved in mQ  $H_2O$  (50.0  $\mu$ mol, 500  $\mu$ L, 5 equiv). Next, 100  $\mu$ L of NDT stock solution (0.1 mg/mL) was added alongside 200  $\mu$ L of mQ  $H_2O$  to afford a final volume of 1 mL and the resulting reaction



mixture was shaken at 950 rpm at 40 °C for 24 h. The crude reaction mixture was purified by preparative HPLC (method D) affording the target nucleoside **11**.

**<sup>1</sup>H NMR** (400 MHz, (CD<sub>3</sub>)<sub>2</sub>SO, ppm) δ 8.82 (s, 1H, H<sup>8</sup>), 8.35 (d, J = 5.2 Hz, 1H, H<sup>1</sup> or H<sup>2</sup>), 7.51 (d, J = 5.3 Hz, 1H, H<sup>1</sup> or H<sup>2</sup>), 6.07 (d, J = 5.6 Hz, 1H, H<sup>1</sup>), 5.50 (d, J = 5.9 Hz, 1H, OH<sup>2</sup>), 5.21 (d, J = 5.0 Hz, 1H, OH<sup>3</sup>), 5.15 (dd, J = 6.2, 5.0 Hz, 1H, OH<sup>5</sup>), 4.63 (*app* q, J = 5.4 Hz, 1H, H<sup>2</sup>), 4.19 (*app* q, J = 4.7 Hz, 1H, H<sup>3</sup>), 3.99 (*app* q, J = 3.8 Hz, 1H, H<sup>4</sup>), 3.70 (ddd, J = 12.0, 5.0, 3.9 Hz, 1H, H<sup>5</sup> or H<sup>5'</sup>), 3.58 (ddd, J = 12.0, 6.1, 3.9 Hz, 1H, H<sup>5</sup> or H<sup>5'</sup>).

NMR in agreement with literature.<sup>2</sup>

**<sup>13</sup>C{<sup>1</sup>H}-NMR** (101 MHz, (CD<sub>3</sub>)<sub>2</sub>SO, ppm) δ 147.3(C<sup>4</sup>), 144.7(C<sup>2</sup> or C<sup>1</sup>), 144.6(C<sup>8</sup>), 133.3(C<sup>5</sup> or C<sup>6</sup>), 133.0(C<sup>5</sup> or C<sup>6</sup>), 118.8(C<sup>2</sup> or C<sup>1</sup>), 87.8(C<sup>1'</sup>), 85.6(C<sup>4'</sup>), 73.6(C<sup>2'</sup>), 70.3(C<sup>3'</sup>), 61.3(C<sup>5'</sup>).

**RP-HPLC** (Method A): t<sub>R</sub> = 5.86 min, 97% conversion (std = 1).

**HRMS** (ESI) *m/z*: [M+Na]<sup>+</sup> calcd for C<sub>11</sub>H<sub>12</sub>ClN<sub>3</sub>O<sub>4</sub>Na 308.0409; found 308.0406.

### 2-fluoro-ribosyl-adenosine (**12**)

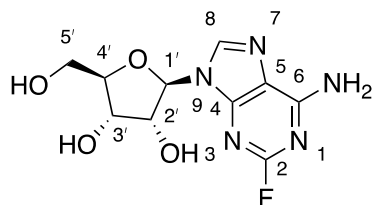

Prepared using the general enzymatic nucleoside transglycosylation procedure A. A 50 mM nucleobase stock solution (10 mg dissolved in 1306 μL) in mQ H<sub>2</sub>O (10.0 μmol, 200 μL, 1 equiv) was mixed with a 100 mM cytidine solution (243 mg in 10 mL), which was dissolved in mQ H<sub>2</sub>O (50.0 μmol, 500 μL, 5 equiv). Next, 100 μL of NDT stock solution (0.1 mg/mL) was added alongside 200 μL of mQ H<sub>2</sub>O to afford a final volume of 1 mL and the resulting reaction mixture was shaken at 950 rpm at 40 °C for 24 h. The crude reaction mixture was purified by preparative HPLC (method D) affording the target nucleoside (**12**).

**<sup>1</sup>H NMR** (400 MHz, (CD<sub>3</sub>)<sub>2</sub>SO, ppm) δ 8.35 (s, 1H, C<sup>8</sup>), 7.86 (s, 2H, NH<sub>2</sub>), 5.79 (d, J = 5.9 Hz, 1H, H<sup>1</sup>), 5.47 (dd, J = 6.1, 3.0 Hz, 1H, OH<sup>2</sup>), 5.19 (dd, J = 4.9, 3.0 Hz, 1H, OH<sup>3</sup>), 5.05 (t, J = 5.6 Hz, 1H, OH<sup>5</sup>), 4.52 (*app* q, J = 5.6 Hz, 1H, H<sup>2</sup>), 4.17 – 4.09 (m, 1H, H<sup>3</sup>), 3.94 (*app* q, J = 3.9 Hz, 1H, H<sup>4</sup>), 3.67 (*app* dt, J = 12.0, 4.3 Hz, 1H, H<sup>5</sup> or H<sup>5'</sup>), 3.55 (ddd, J = 11.9, 6.1, 4.0 Hz, 1H H<sup>5</sup> or H<sup>5'</sup>).

$^{13}\text{C}\{^1\text{H}\}$ -NMR (101 MHz,  $(\text{CD}_3)_2\text{SO}$ , ppm)  $\delta$  158.6(d,  $J = 180.5$ ,  $\text{C}^2$ ), 157.62( $\text{C}^6$ ), 150.55(d,  $J = 20.0$  Hz,  $\text{C}^4$ ), 139.9( $\text{C}^8$ ), 117.5( $\text{C}^5$ ), 87.4( $\text{C}^1$ ), 85.6( $\text{C}^4$ ), 73.5( $\text{C}^2$ ), 70.3( $\text{C}^3$ ), 61.3( $\text{C}^5$ ).

146.4( $\text{C}^4$ ), 144.4( $\text{C}^8$ ), 134.7( $\text{C}^5$ ), 130.7( $\text{C}^6$ ), 122.2( $\text{C}^1$ ), 87.2( $\text{C}^1$ ), 85.6( $\text{C}^4$ ), 73.5( $\text{C}^2$ ), 70.4( $\text{C}^3$ ), 61.3( $\text{C}^5$ )

$^{19}\text{F}\{^1\text{H}\}$ - NMR (376 MHz,  $(\text{CD}_3)_2\text{SO}$ , ppm)  $\delta$  -52.1.

NMR values in agreement with literature.<sup>5</sup>

RP-HPLC (Method A):  $t_{\text{R}} = 4.20$  min, 92% conversion (std = 5).

HRMS (ESI)  $m/z$ :  $[\text{M}+\text{Na}]^+$  calcd for  $\text{C}_{10}\text{H}_{12}\text{FN}_5\text{O}_4\text{Na}$  308.0766; found 308.0762.

### N-6-methyl-adenosine (**13**)

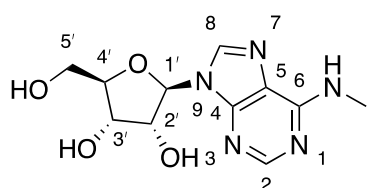

Prepared using the general enzymatic nucleoside transglycosylation procedure A. A 50 mM nucleobase stock solution (20 mg dissolved in 2682  $\mu\text{L}$ ) in mQ  $\text{H}_2\text{O}$  (10.0  $\mu\text{mol}$ , 200  $\mu\text{L}$ , 1 equiv) was mixed with a 200 mM cytidine solution (243 mg in 5 mL), which was dissolved in mQ  $\text{H}_2\text{O}$  (100.0  $\mu\text{mol}$ , 500  $\mu\text{L}$ , 10 equiv). Next, 300  $\mu\text{L}$  of NDT stock solution (0.3 mg/mL) was added to afford a final volume of 1 mL and the resulting reaction mixture was shaken at 950 rpm at 40  $^\circ\text{C}$  for 24 h. The crude reaction mixture was purified by preparative HPLC (method D) affording the target nucleoside (**13**).

$^1\text{H}$  NMR (400 MHz,  $(\text{CD}_3)_2\text{SO}$ , ppm)  $\delta$  8.34 (s, 1H,  $H^8$ ), 8.23 (s, 1H,  $H^2$ ), 7.81 (s, 1H,  $\text{NH}$ ), 5.89 (d,  $J = 6.2$  Hz, 1H,  $H^1$ ), 5.44 – 5.39 (m, 2H,  $\text{OH}^{2'}$  and  $\text{OH}^{5'}$ ), 5.20 (s, 1H,  $\text{OH}^{3'}$ ), 4.61 (dd,  $J = 6.2, 4.9$  Hz, 1H,  $H^{2'}$ ), 4.15 (dd,  $J = 5.0, 3.0$  Hz, 1H,  $H^{3'}$ ), 3.97 (app q,  $J = 3.4$  Hz, 1H,  $H^{4'}$ ), 3.68 (app dd,  $J = 12.1, 3.6$  Hz, 1H,  $H^{5'}$  or  $H^{5''}$ ), 3.56 (app d,  $J = 11.0$  Hz, 1H,  $H^{5'}$  or  $H^{5''}$ ), 2.97 (s, 3H,  $\text{NHCH}_3$ ).

$^{13}\text{C}\{^1\text{H}\}$ -NMR (101 MHz,  $(\text{CD}_3)_2\text{SO}$ , ppm)  $\delta$  155.1( $\text{C}^6$ ), 152.4( $\text{C}^2$ ), 148.1( $\text{C}^4$ ), 139.6( $\text{C}^8$ ), 119.9( $\text{C}^5$ ), 87.9( $\text{C}^1$ ), 85.9( $\text{C}^4$ ), 73.5( $\text{C}^2$ ), 70.6( $\text{C}^3$ ), 61.6( $\text{C}^5$ ), 26.9( $\text{CH}_3$ ).

NMR values in agreement with literature.<sup>4</sup>

**RP-HPLC** (Method A):  $t_R$  = 3.04 min, 99% conversion (std = 1).

**HRMS** (ESI)  $m/z$ :  $[M+H]^+$  calcd for  $C_{11}H_{16}N_5O_4$  282.1197; found 282.1194.

### 6-dimethylamino-adenosine (**14**)

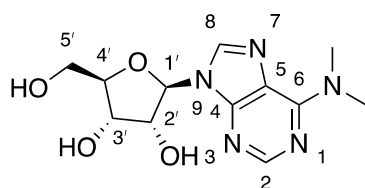

Prepared using the general enzymatic nucleoside transglycosylation procedure A. A 50 mM nucleobase stock solution (12 mg dissolved in 1471  $\mu$ L) in mQ  $H_2O$  (10.0  $\mu$ mol, 200  $\mu$ L, 1 equiv) was mixed with a 100 mM cytidine solution (243 mg in 10 mL), which was dissolved in mQ  $H_2O$  (50.0  $\mu$ mol, 500  $\mu$ L, 5 equiv). Next, 200  $\mu$ L of NDT stock solution (0.2 mg/mL) was added alongside 100  $\mu$ L of mQ  $H_2O$  to afford a final volume of 1 mL and the resulting reaction mixture was shaken at 950 rpm at 40  $^{\circ}C$  for 24 h. The crude reaction mixture was purified by preparative HPLC (method D) affording the target nucleoside (**14**).

**$^1H$  NMR** (400 MHz,  $(CD_3)_2SO$ , ppm)  $\delta$  8.33 (s, 1H,  $H^2$  or  $H^8$ ), 8.21 (s, 1H,  $H^2$  or  $H^8$ ), 5.92 (d,  $J$  = 5.9 Hz, 1H,  $H^{1'}$ ), 5.35 - 5.29 (m, 1H,  $OH^{2'}$ ), 5.22 (dd,  $J$  = 6.8, 4.7 Hz, 1H  $OH^{5'}$ ), 5.05 (d,  $J$  = 4.5 Hz, 1H,  $OH^{3'}$ ), 4.58 (*app* q,  $J$  = 5.1 Hz, 1H,  $H^{2'}$ ), 4.20 - 4.13 (*m*, 1H,  $H^{3'}$ ), 3.97 (*app* q,  $J$  = 3.6 Hz, 1H,  $H^{4'}$ ), 3.68 (ddd,  $J$  = 12.1, 4.5, 3.6 Hz, 1H,  $H^{5'}$  or  $H^{5''}$ ), 3.57 (ddd,  $J$  = 12.0, 6.7, 3.8 Hz, 1H,  $H^{5'}$  or  $H^{5''}$ ), 3.46 (s, 6H,  $CH_3$ ).

**$^{13}C\{^1H\}$ -NMR** (101 MHz,  $(CD_3)_2SO$ , ppm)  $\delta$  154.3( $C^4$  or  $C^5$  or  $C^6$ ), 151.7( $C^2$  or  $C^8$ ), 149.9 ( $C^4$  or  $C^5$  or  $C^6$ ), 138.6( $C^2$  or  $C^8$ ), 119.8( $C^4$  or  $C^5$  or  $C^6$ ), 87.8( $C^{1'}$ ), 85.7( $C^{4'}$ ), 73.5( $C^{2'}$ ), 70.5( $C^{3'}$ ), 61.5( $C^{5'}$ ), 37.8 ( $NCH_3CH_3$ ).

NMR values in agreement with literature.<sup>3</sup>

**RP-HPLC** (Method A):  $t_R$  = 4.2 min, 97% conversion (std = 1).

**HRMS** (ESI)  $m/z$ :  $[M+H]^+$  calcd for  $C_{12}H_{18}N_5O_4$  296.1353; found 296.1350.

## 2-bromo-1-deaza-riboseyl-purine (15)

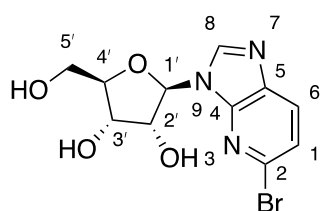

Prepared using the general enzymatic nucleoside transglycosylation procedure A. A 50 mM nucleobase stock solution (14.2 mg dissolved in 1434  $\mu\text{L}$ ) in mQ  $\text{H}_2\text{O}$  (10.0  $\mu\text{mol}$ , 200  $\mu\text{L}$ , 1 equiv) was mixed with a 100 mM cytidine solution (243 mg in 10 mL), which was dissolved in mQ  $\text{H}_2\text{O}$  (50.0  $\mu\text{mol}$ , 500  $\mu\text{L}$ , 5 equiv). Next, 100  $\mu\text{L}$  of NDT stock solution (0.1 mg/mL) was added alongside 200  $\mu\text{L}$  of mQ  $\text{H}_2\text{O}$  to afford a final volume of 1 mL and the resulting reaction mixture was shaken at 950 rpm at 40  $^\circ\text{C}$  for 24 h. The crude reaction mixture was purified by preparative HPLC (method D) affording the target nucleoside (**15**).

**$^1\text{H}$  NMR** (400 MHz,  $(\text{CD}_3)_2\text{SO}$ , ppm)  $\delta$  8.76 (s, 1H,  $\text{C}^8$ ), 8.12 (d,  $J = 8.4$  Hz, 1H,  $\text{H}^6$ ), 7.62 – 7.49 (m, 1H,  $\text{H}^1$ ), 6.01 (d,  $J = 5.9$  Hz, 1H,  $\text{H}^1$ ), 5.51 (s, 1H,  $\text{OH}^2$ ), 5.25 (s, 1H  $\text{OH}^3$ ), 5.02 (t,  $J = 5.5$  Hz, 1H,  $\text{OH}^5$ ), 4.61 (*app* t,  $J = 5.5$  Hz, 1H,  $\text{H}^2$ ), 4.17 (*app* t,  $J = 4.2$  Hz, 1H  $\text{H}^3$ ), 3.97 (*app* q,  $J = 4.0$  Hz, 1H,  $\text{H}^4$ ), 3.68 (*app* dd,  $J = 10.6, 5.9$  Hz, 1H,  $\text{H}^5$  or  $\text{H}^{5'}$ ), 3.62 – 3.49 (m, 1H,  $\text{H}^5$  or  $\text{H}^{5'}$ ).

**$^{13}\text{C}\{^1\text{H}\}$ -NMR** (101 MHz,  $(\text{CD}_3)_2\text{SO}$ , ppm)  $\delta$  146.4( $\text{C}^4$ ), 144.4( $\text{C}^8$ ), 134.7( $\text{C}^5$ ), 130.7( $\text{C}^6$ ), 122.2( $\text{C}^1$ ), 87.2( $\text{C}^1$ ), 85.6( $\text{C}^4$ ), 73.5( $\text{C}^2$ ), 70.4( $\text{C}^3$ ), 61.3( $\text{C}^5$ ). Missing C2 due to poor signal strength.

**RP-HPLC** (Method A):  $t_{\text{R}} = 6.10$  min, 96% conversion (std = 1).

**HRMS** (ESI)  $m/z$ :  $[\text{M}+\text{Na}]^+$  calcd for  $\text{C}_{11}\text{H}_{12}\text{BrN}_3\text{O}_4\text{Na}$  351.9903; found 351.9902.

## 8-bromo-1-deaza-N3-riboseyl-purine (16)

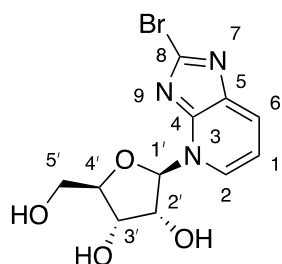

Prepared using the general enzymatic nucleoside transglycosylation procedure A. A 50 mM nucleobase stock solution (20 mg dissolved in 2020  $\mu\text{L}$ ) in DMSO (10.0  $\mu\text{mol}$ , 200  $\mu\text{L}$ , 1 equiv) was mixed with a 200 mM cytidine solution (486 mg in 10 mL), which was dissolved in mQ

H<sub>2</sub>O (50.0 μmol, 500 μL, 10 equiv). Next, 300 μL of NDT stock solution (0.3 mg/mL) was added to afford a final volume of 1 mL and the resulting reaction mixture was shaken at 950 rpm at 40 °C for 24 h. The crude reaction mixture was purified by preparative HPLC (method D) affording the target nucleoside **16**.

**<sup>1</sup>H NMR** (400 MHz, (CD<sub>3</sub>)<sub>2</sub>SO, ppm) δ 8.70 (dd, *J* = 6.6, 1.1 Hz, 1H, *H*<sup>2</sup>), 8.31 (dd, *J* = 7.7, 1.0 Hz, 1H, *H*<sup>6</sup>), 7.35 (dd, *J* = 7.7, 6.6 Hz, 1H, *H*<sup>1</sup>), 6.42 (d, *J* = 4.1 Hz, 1H, *H*<sup>1'</sup>), 5.73 (d, *J* = 5.7 Hz, 1H, *OH*<sup>2'</sup>), 5.49 (dd, *J* = 5.8, 4.7 Hz, 1H, *OH*<sup>5'</sup>), 5.29 – 5.21 (m, 1H, *OH*<sup>3'</sup>), 4.39 (*app* qd, *J* = 4.1, 1.8 Hz, 1H, *H*<sup>2'</sup>), 4.13 (m, 2H, *H*<sup>3'</sup> and *H*<sup>4'</sup>), 3.84 (ddd, *J* = 12.3, 4.8, 2.2 Hz, 1H, *H*<sup>5'</sup> or *H*<sup>5</sup>), 3.70 (ddd, *J* = 12.3, 6.0, 2.3 Hz, 1H, *H*<sup>5'</sup> or *H*<sup>5</sup>).

**<sup>13</sup>C{<sup>1</sup>H}-NMR** (101 MHz, (CD<sub>3</sub>)<sub>2</sub>SO, ppm) δ 151.0(*C*<sup>4</sup>), 148.6(*C*<sup>8</sup>), 143.6(*C*<sup>5</sup>), 128.9(*C*<sup>6</sup>), 128.3(*C*<sup>2</sup>), 113.6(*C*<sup>1</sup>), 94.3(*C*<sup>1'</sup>), 86.1(*C*<sup>4'</sup>), 75.3(*C*<sup>2'</sup>), 69.4(*C*<sup>3'</sup>), 60.3(*C*<sup>5'</sup>).

**RP-HPLC** (Method A): *t*<sub>R</sub> = 4.21 min, 61% conversion (std = 4).

**HRMS** (ESI) *m/z*: [M+H]<sup>+</sup> calcd for C<sub>11</sub>H<sub>13</sub><sup>79</sup>BrN<sub>3</sub>O<sub>4</sub> 330.0084; found 330.0079.

#### 5-iodo-uridine (**18**)

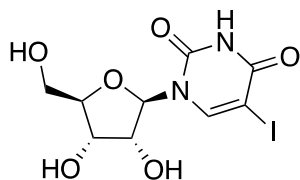

Prepared using the general enzymatic nucleoside transglycosylation procedure A. A 50 mM nucleobase stock solution (12 mg dissolved in 1008 μL) in DMSO (10.0 μmol, 200 μL, 1 equiv) was mixed with a 200 mM cytidine solution (486 mg in 10 mL), which was dissolved in mQ H<sub>2</sub>O (100.0 μmol, 500 μL, 10 equiv). Next, 300 μL of NDT stock solution (0.3 mg/mL) to afford a final volume of 1 mL and the resulting reaction mixture was shaken at 950 rpm at 40 °C for 24 h. The crude reaction mixture was purified by preparative HPLC (method D) affording the target nucleoside **18**.

**RP-HPLC** (Method A): *t*<sub>R</sub> = 3.75 min, 29% conversion (std = 1).

Characterisation of the target nucleoside was confirmed through <sup>1</sup>H NMR in comparison with the large-scale characterisation.

#### 5-fluorouridine (**19**)

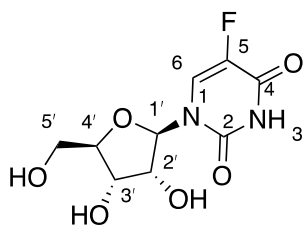

Prepared using the general enzymatic nucleoside transglycosylation procedure A. A 50 mM nucleobase stock solution (11 mg dissolved in 1691  $\mu\text{L}$ ) in  $\text{H}_2\text{O}$  (10.0  $\mu\text{mol}$ , 200  $\mu\text{L}$ , 1 equiv) was mixed with a 200 mM 5-methyluridine solution (516 mg in 10 mL), which was dissolved in mQ  $\text{H}_2\text{O}$  (100.0  $\mu\text{mol}$ , 500  $\mu\text{L}$ , 10 equiv). Next, 300  $\mu\text{L}$  of NDT stock solution (0.3 mg/mL) to afford a final volume of 1 mL and the resulting reaction mixture was shaken at 950 rpm at 40  $^\circ\text{C}$  for 24 h. The crude reaction mixture was purified by preparative HPLC (method D) affording the target nucleoside (**19**).

**$^1\text{H}$  NMR** (400 MHz,  $(\text{CD}_3)_2\text{SO}$ , ppm)  $\delta$  11.83 (s, 1H, NH), 8.14 (s, 1H,  $H^6$ ), 5.73 (dd,  $J = 4.6$ , 1.9 Hz, 1H,  $H^1$ ), 5.35 (d,  $J = 5.2$  Hz, 1H,  $\text{OH}^2$ ), 5.21 (t,  $J = 4.9$  Hz, 1H,  $\text{OH}^5$ ), 5.04 (s, 1H,  $\text{OH}^3$ ), 4.00 (*app* dq,  $J = 9.6$ , 4.8 Hz, 2H,  $H^{3'}$  and  $H^{2'}$ ), 3.83 (*app* q,  $J = 3.2$  Hz, 1H,  $H^{4'}$ ), 3.71 – 3.62 (m, 1H,  $H^{5'}$  or  $H^{5''}$ ), 3.56 (ddd,  $J = 12.1$ , 4.9, 3.0 Hz, 1H,  $H^{5'}$  or  $H^{5''}$ ).

**$^{13}\text{C}\{^1\text{H}\}$ -NMR** (101 MHz,  $(\text{CD}_3)_2\text{SO}$ , ppm)  $\delta$  164.9( $\text{C}^4$  or  $\text{C}^2$ ), 151.5( $\text{C}^4$  or  $\text{C}^2$ ), 137.7( $\text{C}^6$ ), 107.6, 88.3( $\text{C}^1$ ), 84.6( $\text{C}^4$ ), 73.7( $\text{C}^2$ ), 69.4( $\text{C}^3$ ), 60.4( $\text{C}^5$ ). Missing C5 due to poor signal strength.

**$^{19}\text{F}\{^1\text{H}\}$ -NMR** (376 MHz,  $(\text{CD}_3)_2\text{SO}$ , ppm)  $\delta$  -167.5.

NMR values in agreement with literature.<sup>6</sup>

**RP-HPLC** (Method A):  $t_{\text{R}} = 1.83$  min, 18% conversion (std = 2).

**HRMS (ESI)**  $m/z$ :  $[\text{M}+\text{Na}]^+$  calcd for  $\text{C}_9\text{H}_{11}\text{FN}_2\text{O}_6\text{Na}$  285.0493; found, 285.0489.

### 5-trifluorouridine (**20**)

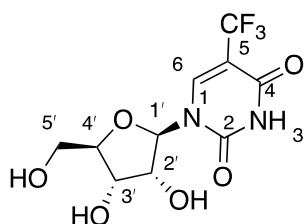

Prepared using the general enzymatic nucleoside transglycosylation procedure A. A 50 mM nucleobase stock solution (15 mg dissolved in 1666  $\mu\text{L}$ ) in DMSO (10.0  $\mu\text{mol}$ , 200  $\mu\text{L}$ , 1 equiv)

was mixed with a 200 mM cytidine solution (486 mg in 10 mL), which was dissolved in mQ H<sub>2</sub>O (100.0 μmol, 500 μL, 10 equiv). Next, 300 μL of NDT stock solution (0.3 mg/mL) to afford a final volume of 1 mL and the resulting reaction mixture was shaken at 950 rpm at 40 °C for 24 h. The crude reaction mixture was purified by preparative HPLC (method D) affording the target nucleoside (**20**).

**<sup>1</sup>H NMR** (400 MHz, (CD<sub>3</sub>)<sub>2</sub>SO, ppm) δ 11.83 (s, 1H, NH), 8.83 (s, 1H, H<sup>6</sup>), 5.72 (d, *J* = 3.1 Hz, 1H, H<sup>1'</sup>), 5.48 (d, *J* = 4.9 Hz, 1H, OH<sup>2'</sup>), 5.31 (t, *J* = 4.4 Hz, 1H, OH<sup>5'</sup>), 5.04 (d, *J* = 5.8 Hz, 1H, OH<sup>3'</sup>), 4.06 (*app* q, *J* = 4.0 Hz, 1H, H<sup>2'</sup>), 4.00 (*app* q, *J* = 5.0 Hz, 1H, H<sup>3'</sup>), 3.90 (*app* dt, *J* = 6.2, 2.3 Hz, 1H, H<sup>4'</sup>), 3.74 (*app* dt, *J* = 12.2, 3.3 Hz, 1H, H<sup>5'</sup> or H<sup>5''</sup>), 3.64 – 3.55 (m, 1H, H<sup>5'</sup> or H<sup>5''</sup>).

**<sup>13</sup>C{<sup>1</sup>H}-NMR** (101 MHz, (CD<sub>3</sub>)<sub>2</sub>SO, ppm) δ 160.0(C<sup>4</sup> or C<sup>2</sup>), 149.9(C<sup>4</sup> or C<sup>2</sup>), 142.3(C<sup>6</sup>), 89.4(C<sup>1'</sup>), 84.2(C<sup>4'</sup>), 74.3(C<sup>2'</sup>), 68.5(C<sup>3'</sup>), 59.3(C<sup>5'</sup>). Missing C5 due to poor signal strength.

**<sup>19</sup>F{<sup>1</sup>H}-NMR** (376 MHz, CD<sub>3</sub>)<sub>2</sub>SO, ppm) δ -61.5.

NMR values in agreement with literature.<sup>1</sup>

**RP-HPLC** (Method A): *t<sub>R</sub>* = 3.80 min, 29% conversion (std = 1).

**HRMS (ESI)** *m/z*: [M+Na]<sup>+</sup> calcd for C<sub>10</sub>H<sub>11</sub>F<sub>3</sub>N<sub>2</sub>O<sub>6</sub>Na 335.0459; found, 335.0456

### 5-ethynyluridine (**21**)

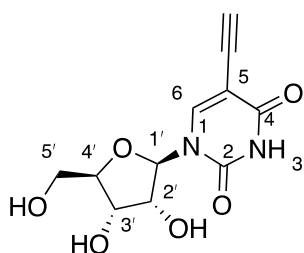

Prepared using the general enzymatic nucleoside transglycosylation procedure A. A 50 mM nucleobase stock solution (15 mg dissolved in 2204 μL) in DMSO (10.0 μmol, 200 μL, 1 equiv) was mixed with a 200 mM cytidine solution (486 mg in 10 mL), which was dissolved in mQ H<sub>2</sub>O (100.0 μmol, 500 μL, 10 equiv). Next, 300 μL of NDT stock solution (0.3 mg/mL) to afford a final volume of 1 mL and the resulting reaction mixture was shaken at 950 rpm at 40 °C for 24 h. The crude reaction mixture was purified by preparative HPLC (method D) affording the target nucleoside (**21**).

**<sup>1</sup>H NMR** (400 MHz, (CD<sub>3</sub>)<sub>2</sub>SO, ppm) δ 11.63 (s, 1H, NH), 8.38 (s, 1H, H<sup>6</sup>), 5.75 (d, *J* = 4.6 Hz, 1H, H<sup>1</sup>), 5.42 (d, *J* = 5.3 Hz, 1H, OH<sup>2</sup>), 5.23 (t, *J* = 4.8 Hz, 1H, OH<sup>5</sup>), 5.06 (d, *J* = 5.3 Hz, 1H, OH<sup>3</sup>), 4.10 (s, 1H, CH), 4.05 (*app* q, *J* = 5.0 Hz, 1H, H<sup>2</sup>), 3.99 (*app* q, *J* = 4.9 Hz, 1H, H<sup>3</sup>), 3.87 (dd, *J* = 4.8, 2.7 Hz, 1H, H<sup>4</sup>), 3.69 (ddd, *J* = 12.1, 4.9, 3.0 Hz, 1H, H<sup>5</sup> or H<sup>5'</sup>), 3.58 (ddd, *J* = 12.1, 4.8, 2.7 Hz, 1H, H<sup>5</sup> or H<sup>5'</sup>).

**<sup>13</sup>C{<sup>1</sup>H}-NMR** (101 MHz, (CD<sub>3</sub>)<sub>2</sub>SO, ppm) δ 161.6(C<sup>4</sup> or C<sup>2</sup>), 149.6(C<sup>4</sup> or C<sup>2</sup>), 144.6(C<sup>6</sup>), 97.6(CCH), 88.4(C<sup>1</sup>), 84.7(C<sup>5</sup>C), 83.6(C<sup>4</sup>), 76.3(C<sup>5</sup>), 73.9(C<sup>2</sup>), 69.3(C<sup>3</sup>), 60.2(C<sup>5</sup>).

NMR values in agreement with literature.<sup>8</sup>

**RP-HPLC** (Method A): *t<sub>R</sub>* = 3.1 min, 39% conversion (std = 2).

**HRMS (ESI)** *m/z*: [M+Na]<sup>+</sup> calcd for C<sub>11</sub>H<sub>12</sub>N<sub>2</sub>O<sub>6</sub>Na 291.0588; found, 291.0584

### 5-azidouridine (**22**)

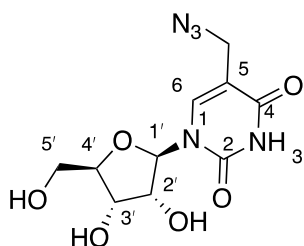

Prepared using the general enzymatic nucleoside transglycosylation procedure A. A 50 mM nucleobase stock solution (11 mg dissolved in 1316 μL) in DMSO (10.0 μmol, 200 μL, 1 equiv) was mixed with a 200 mM cytidine solution (486 mg in 10 mL), which was dissolved in mQ H<sub>2</sub>O (100.0 μmol, 500 μL, 10 equiv). Next, 300 μL of NDT stock solution (0.3 mg/mL) to afford a final volume of 1 mL and the resulting reaction mixture was shaken at 950 rpm at rt for 24 h. The crude reaction mixture was purified by preparative HPLC (method D) affording the target nucleoside (**22**).

**<sup>1</sup>H NMR** (400 MHz, (CD<sub>3</sub>)<sub>2</sub>SO, ppm) δ 11.54 (s, 1H, NH), 8.08 (s, 1H, H<sup>6</sup>), 5.77 (d, *J* = 5.2 Hz, 1H, H<sup>1</sup>), 5.39 (d, *J* = 5.6 Hz, 1H, OH<sup>2</sup>), 5.16 – 5.02 (m, 2H, OH<sup>3</sup> and OH<sup>5</sup>), 4.08 – 4.00 (m, 3H, H<sup>2</sup> and CH), 3.97 (*app* q, *J* = 4.9 Hz, 1H, H<sup>3</sup>), 3.88 – 3.80 (m, 1H, H<sup>4</sup>), 3.66 (ddd, *J* = 12.0, 5.3, 3.4 Hz, 1H, H<sup>5</sup> or H<sup>5'</sup>), 3.60 – 3.49 (m, 1H, H<sup>5</sup> or H<sup>5'</sup>).



$^{13}\text{C}\{^1\text{H}\}$ -NMR (101 MHz,  $(\text{CD}_3)_2\text{SO}$ , ppm)  $\delta$  164.0( $\text{C}^4$ ), 150.7( $\text{C}^2$ ), 140.1( $\text{C}^6$ ), 108.4( $\text{C}^5$ ), 88.4( $\text{C}^1$ ), 85.3( $\text{C}^4$ ), 74.0( $\text{C}^2$ ), 70.1( $\text{C}^3$ ), 61.2( $\text{C}^5$ ), 47.4( $\text{C}^5\text{CH}$ ).

NMR values in agreement with literature.<sup>9</sup>

**RP-HPLC** (Method A):  $t_{\text{R}}$  = 3.2 min, 35% conversion (std = 1).

**HRMS (ESI)**  $m/z$ :  $[\text{M}-\text{H}]^-$  calcd for  $\text{C}_{10}\text{H}_{12}\text{N}_5\text{O}_6$  298.0793; found, 298.0792

### 5-fluorocytidine (**23**)

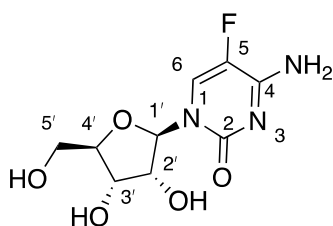

Prepared using the general enzymatic nucleoside transglycosylation procedure A. A 50 mM nucleobase stock solution (14 mg dissolved in 2169  $\mu\text{L}$ ) in  $\text{H}_2\text{O}$  (10.0  $\mu\text{mol}$ , 200  $\mu\text{L}$ , 1 equiv) was mixed with a 200 mM 5-methyluridine solution (516 mg in 10 mL), which was dissolved in mQ  $\text{H}_2\text{O}$  (100.0  $\mu\text{mol}$ , 500  $\mu\text{L}$ , 10 equiv). Next, 300  $\mu\text{L}$  of NDT stock solution (0.3 mg/mL) to afford a final volume of 1 mL and the resulting reaction mixture was shaken at 950 rpm at 40  $^\circ\text{C}$  for 24 h. The crude reaction mixture was purified by preparative HPLC (method D) affording the target nucleoside (**23**).

$^1\text{H}$  NMR (500 MHz,  $(\text{CD}_3)_2\text{SO}$ , ppm)  $\delta$  8.21 (d,  $J$  = 7.4 Hz, 1H,  $H^6$ ), 7.73 (s, 1H,  $\text{NH}$ ), 7.50 (s, 1H,  $\text{NH}$ ), 5.72 (dd,  $J$  = 3.9, 1.9 Hz, 1H,  $H^{1'}$ ), 5.33 (d,  $J$  = 5.2 Hz, 1H,  $\text{OH}^{3'}$  or  $\text{OH}^{2'}$ ), 5.19 (t,  $J$  = 5.0 Hz, 1H  $\text{OH}^{5'}$ ), 4.98 (d,  $J$  = 5.5 Hz, 1H,  $\text{OH}^{3'}$  or  $\text{OH}^{2'}$ ), 3.95 (*app* tt,  $J$  = 9.4, 5.1 Hz, 2H,  $H^{3'}$  and  $H^{2'}$ ), 3.84 (*app* dt,  $J$  = 5.6, 2.9 Hz, 1H,  $H^{4'}$ ), 3.74 – 3.67 (m, 1H,  $H^{5'}$  or  $H^{5''}$ ), 3.62 – 3.54 (m, 1H,  $H^{5'}$  or  $H^{5''}$ ).

$^{13}\text{C}\{^1\text{H}\}$ -NMR (126 MHz,  $(\text{CD}_3)_2\text{SO}$ , ppm)  $\delta$  157.3 (d,  $J$  = 13.3 Hz,  $\text{C}^4$ ), 154.0( $\text{C}^2$ ), 136.0 (d,  $J$  = 240.1 Hz,  $\text{C}^5$ ), 125.7(d,  $J$  = 32.3,  $\text{C}^6$ ), 89.7( $\text{C}^1$ ), 84.5( $\text{C}^4$ ), 74.7( $\text{C}^2$ ), 69.5( $\text{C}^3$ ), 60.6( $\text{C}^5$ ).

$^{19}\text{F}\{^1\text{H}\}$ -NMR (471 MHz,  $(\text{CD}_3)_2\text{SO}$ , ppm)  $\delta$  -167.7.

NMR values in agreement with literature.<sup>7</sup>

**RP-HPLC** (Method A):  $t_R = 1.50$  min, 18% conversion (std = 1).

**HRMS (ESI)**  $m/z$ :  $[M+Na]^+$  calcd for  $C_9H_{12}FN_3O_5Na$  284.0653; found, 284.0650.

### 5-methylcytosine (24)

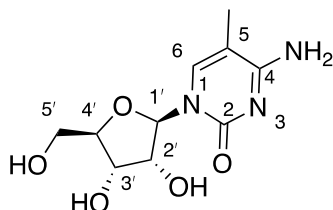

Prepared using the general enzymatic nucleoside transglycosylation procedure A. A 50 mM nucleobase stock solution (8 mg dissolved in 1279  $\mu$ L) in  $H_2O$  (10.0  $\mu$ mol, 200  $\mu$ L, 1 equiv) was mixed with a 200 mM 5-methyluridine solution (516 mg in 10 mL), which was dissolved in mQ  $H_2O$  (100.0  $\mu$ mol, 500  $\mu$ L, 10 equiv). Next, 300  $\mu$ L of NDT stock solution (0.3 mg/mL) to afford a final volume of 1 mL and the resulting reaction mixture was shaken at 950 rpm at 40 °C for 24 h. The crude reaction mixture was purified by preparative HPLC (method D) affording the target nucleoside (**24**).

**$^1H$  NMR** (400 MHz,  $(CD_3)_2SO$ , ppm)  $\delta$  7.68 (s, 1H,  $H^6$ ), 7.25 (s, 1H,  $NH$ ), 6.78 (s, 1H,  $NH$ ), 5.80 – 5.74 (m, 1H,  $H^{1'}$ ), 5.26 – 5.19 (m, 1H,  $OH^{2'}$ ), 5.06 (t,  $J = 5.3$  Hz, 1H,  $OH^{5'}$ ), 4.97 – 4.91 (m, 1H,  $OH^{3'}$ ), 4.00 – 3.90 (m, 2H,  $H^{3'}$  and  $H^{2'}$ ), 3.80 (*app* q,  $J = 3.6$  Hz, 1H,  $H^{4'}$ ), 3.66 (ddd,  $J = 12.0, 5.2, 3.1$  Hz, 1H,  $H^{5'}$  or  $H^{5''}$ ), 3.54 (ddd,  $J = 12.0, 5.5, 3.5$  Hz, 1H,  $H^{5'}$  or  $H^{5''}$ ).

**$^{13}C\{^1H\}$ -NMR** (101 MHz,  $(CD_3)_2SO$ , ppm)  $\delta$  165.8( $C^4$  or  $C^5$ ), 139.3( $C^6$ ), 101.5( $C^4$  or  $C^5$ ), 89.5( $C^{1'}$ ), 84.5( $C^{4'}$ ), 74.3( $C^{2'}$ ), 69.9( $C^{3'}$ ), 61.2( $C^{5'}$ ), 13.8( $C^5C$ ). C2 missing due to poor signal strength.

**RP-HPLC** (Method A):  $t_R = 1.97$  min, 15% conversion (std = 1).

**HRMS (ESI)**  $m/z$ :  $[M+Na]^+$  calcd for  $C_{10}H_{16}N_3O_5$  258.1085; found, 258.1082.

### 3.3 2'-Fluoro Nucleoside Analogues

#### 6-Bromo-1-deazapurine-2'-arabino-fluoro-ribose (29)

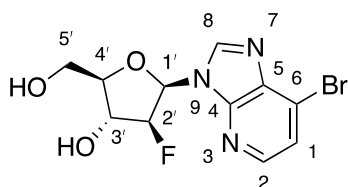

Prepared using the general enzymatic nucleoside transglycosylation procedure A. A 50 mM nucleobase stock solution (20 mg dissolved in 2020  $\mu\text{L}$ ) in mQ  $\text{H}_2\text{O}$  (5.0  $\mu\text{mol}$ , 200  $\mu\text{L}$ , 1 equiv) was mixed with a 100 mM 1-(2-Deoxy-2-fluoro-b-D-arabinofuranosyl)uracil solution (246 mg in 10 mL), which was dissolved in mQ  $\text{H}_2\text{O}$  (40.0  $\mu\text{mol}$ , 800  $\mu\text{L}$ , 8 equiv). Next, 1 mL of NDT stock solution (2 mg/mL) was added to afford a final volume of 2 mL and the resulting reaction mixture was shaken at 950 rpm at 40  $^\circ\text{C}$  for 24 h. The crude reaction mixture was purified by preparative HPLC (method D) affording the target nucleoside (**29**).

**$^1\text{H}$  NMR** (400 MHz,  $(\text{CD}_3)_2\text{SO}$ , ppm)  $\delta$  8.70 (d,  $J$  = 1.9 Hz, 1H,  $H^8$ ), 8.27 (d,  $J$  = 5.2 Hz, 1H,  $H^2$ ), 7.65 (d,  $J$  = 5.2 Hz, 1H,  $H^1$ ), 6.58 (dd,  $J$  = 13.8, 4.6 Hz, 1H,  $H^1$ ), 5.98 (d,  $J$  = 4.9 Hz, 1H,  $\text{OH}^3$ ), 5.27 (ddd,  $J$  = 52.6, 4.6, 3.9 Hz, 1H,  $H^2$ ), 5.13 (t,  $J$  = 5.6 Hz, 1H,  $\text{OH}^5$ ), 4.47 (*app* dq,  $J$  = 18.8, 4.6 Hz, 1H,  $H^3$ ), 3.90 (*app* tdd,  $J$  = 5.1, 4.1, 0.9 Hz, 1H,  $H^4$ ), 3.77 – 3.60 (m, 2H,  $H^5$  or  $H^5''$ ).

**$^{13}\text{C}\{^1\text{H}\}$ -NMR** (101 MHz,  $(\text{CD}_3)_2\text{SO}$ , ppm)  $\delta$  146.1( $\text{C}^4$ ), 144.8( $\text{C}^2$ ), 144.5 (d,  $J$  = 3.9 Hz,  $\text{C}^8$ ), 134.0( $\text{C}^5$ ), 123.1( $\text{C}^6$ ), 122.0( $\text{C}^1$ ), 95.3 (d,  $J$  = 192.3 Hz,  $\text{C}^2$ ), 83.6 (d,  $J$  = 5.6 Hz,  $\text{C}^4$ ), 81.8 (d,  $J$  = 16.9 Hz,  $\text{C}^1$ ), 72.5 (d,  $J$  = 23.2 Hz,  $\text{C}^3$ ), 60.3( $\text{C}^5$ ).

**$^{19}\text{F}$  NMR** (471 MHz,  $(\text{CD}_3)_2\text{SO}$ , ppm)  $\delta$  -197.95 (ddd,  $J$  = 52.8, 19.0, 13.8 Hz).

**RP-HPLC** (Method A):  $t_{\text{R}}$  = 6.56 min, 25% conversion (std = 2).

**HRMS** (ESI)  $m/z$ :  $[\text{M}+\text{Na}]^+$  calcd for  $\text{C}_{11}\text{H}_{11}\text{O}_3\text{N}_3\text{BrFNa}$  353.9860; found 353.9854.

### 6-Bromo-1-deazapurine-2'-fluoro-ribose (**27**)

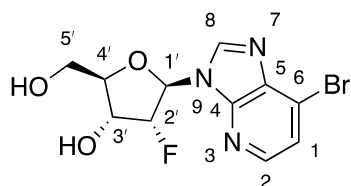

Prepared using the general enzymatic nucleoside transglycosylation procedure A. A 50 mM nucleobase stock solution (20 mg dissolved in 2020  $\mu\text{L}$ ) in mQ  $\text{H}_2\text{O}$  (5.0  $\mu\text{mol}$ , 200  $\mu\text{L}$ , 1 equiv) was mixed with a 200 mM 2-deoxyfluorocytidine solution (246 mg in 10 mL), which was dissolved in mQ  $\text{H}_2\text{O}$  (80.0  $\mu\text{mol}$ , 800  $\mu\text{L}$ , 16 equiv). Next, 1 mL of NDT stock solution (2 mg/mL) was added to afford a final volume of 2 mL and the resulting reaction mixture was shaken at 950 rpm at 40  $^\circ\text{C}$  for 24 h. The crude reaction mixture was purified by preparative HPLC (method D) affording the target nucleoside (**27**).

**$^1\text{H}$  NMR** (400 MHz,  $(\text{CD}_3)_2\text{SO}$ , ppm)  $\delta$  8.82 (s, 1H,  $H^8$ ), 8.27 (d,  $J = 5.2$  Hz, 1H,  $H^2$ ), 7.66 (d,  $J = 5.2$  Hz, 1H,  $H^1$ ), 6.39 (dd,  $J = 17.2, 2.4$  Hz, 1H,  $H^1'$ ) 5.73 (d,  $J = 6.1$  Hz, 1H,  $\text{OH}^3$ ), 5.46 (ddd,  $J = 52.9, 4.5, 2.4$  Hz, 1H,  $H^2$ ), 5.17 (t,  $J = 5.4$  Hz, 1H,  $\text{OH}^5$ ), 4.52 (*app* dtd,  $J = 20.1, 6.6, 4.4$  Hz, 1H,  $H^3$ ), 4.01 (*app* dt,  $J = 6.8, 3.2$  Hz, 1H,  $H^4$ ), 3.79 (ddd,  $J = 12.4, 5.1, 2.7$  Hz, 1H,  $H^5'$  or  $H^5''$ ), 3.61 (ddd,  $J = 12.4, 5.7, 3.9$  Hz, 1H  $H^5'$  or  $H^5''$ ).

**$^{13}\text{C}\{^1\text{H}\}$ -NMR** (101 MHz,  $(\text{CD}_3)_2\text{SO}$ , ppm)  $\delta$  145.9( $\text{C}^4$ ), 144.4 (d,  $J = 50.4$ ,  $\text{C}^8$ ), 134.8( $\text{C}^5$ ), 123.2( $\text{C}^6$ ), 122.0( $\text{C}^1$ ), 93.5 (d,  $J = 186.4$  Hz,  $\text{C}^2$ ), 86.2 (d,  $J = 33.5$  Hz,  $\text{C}^1'$ ), 83.8( $\text{C}^4$ ), 68.1 (d,  $J = 16.1$  Hz,  $\text{C}^3$ ), 60.0( $\text{C}^5$ ).

**$^{19}\text{F}$  NMR** (471 MHz,  $(\text{CD}_3)_2\text{SO}$ )  $\delta$  -202.8 – -204.2 (m).

**RP-HPLC** (Method A):  $t_{\text{R}} = 6.50$  min, 22% conversion (std = 6).

**HRMS** (ESI)  $m/z$ :  $[\text{M}+\text{Na}]^+$  calcd for  $\text{C}_{11}\text{H}_{12}\text{O}_3\text{N}_3\text{BrFNa}$  353.9860; found 353.9869.

### 2-chloro-adenosine-2'-fluoro-ribose (**28**)

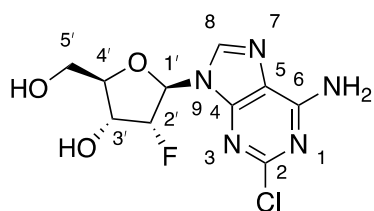

Prepared using the general enzymatic nucleoside transglycosylation procedure A. A 50 mM nucleobase stock solution (9 mg dissolved in 1068  $\mu\text{L}$ ) in mQ  $\text{H}_2\text{O}$  (5.0  $\mu\text{mol}$ , 200  $\mu\text{L}$ , 1 equiv) was mixed with a 200 mM 2-deoxyfluorocytidine solution (246 mg in 10 mL), which was dissolved in mQ  $\text{H}_2\text{O}$  (80.0  $\mu\text{mol}$ , 800  $\mu\text{L}$ , 16 equiv). Next, 1 mL of NDT stock solution (2 mg/mL) was added to afford a final volume of 2 mL and the resulting reaction mixture was

shaken at 950 rpm at 40 °C for 24 h. The crude reaction mixture was purified by preparative HPLC (method D) affording the target nucleoside (**28**).

**<sup>1</sup>H NMR** (500 MHz, (CD<sub>3</sub>)<sub>2</sub>SO, ppm) δ 8.31 (s, 1H, *H*<sup>8</sup>), 7.80 (s, 2H, *NH*), 6.10 (dd, *J* = 16.8, 2.6 Hz, 1H, *H*<sup>1'</sup>), 5.64 (d, *J* = 6.2 Hz, 1H, *OH*<sup>3</sup>), 5.30 (ddd, *J* = 52.7, 4.5, 2.7 Hz, 1H, *H*<sup>2'</sup>), 5.04 (t, *J* = 5.5 Hz, 1H, *OH*<sup>5</sup>), 4.42 – 4.31 (m, 1H, *H*<sup>3'</sup>), 3.90 (*app* dd, *J* = 6.8, 3.4 Hz, 1H, *H*<sup>4'</sup>), 3.68 (ddd, *J* = 12.4, 5.2, 2.8 Hz, 1H, *H*<sup>5'</sup> or *H*<sup>5''</sup>), 3.52 (ddd, *J* = 12.3, 5.8, 4.0 Hz, 1H, *H*<sup>5'</sup> or *H*<sup>5''</sup>).

**<sup>13</sup>C{<sup>1</sup>H}-NMR** (126 MHz, (CD<sub>3</sub>)<sub>2</sub>SO, ppm) δ 157.3, 153.6, 150.3, 140.0(*C*<sup>8</sup>), 118.6, 93.9 (d, *J* = 187.4 Hz, *C*<sup>2'</sup>), 86.2 (d, *J* = 33.1 Hz, *C*<sup>1'</sup>), 84.5(*C*<sup>4'</sup>), 68.6 (d, *J* = 15.8 Hz, *C*<sup>3'</sup>), 60.7(*C*<sup>5'</sup>).

NMR in agreement with literature values.<sup>10</sup>

**<sup>19</sup>F{<sup>1</sup>H}-NMR** (471 MHz, (CD<sub>3</sub>)<sub>2</sub>SO, ppm) δ – 204.0.

**RP-HPLC** (Method A): *t*<sub>R</sub> = 5.63 min, 73% conversion (std = 4).

**HRMS** (ESI) *m/z*: [*M*+*Na*]<sup>+</sup> calcd for C<sub>10</sub>H<sub>11</sub>O<sub>3</sub>N<sub>5</sub>ClFNa 326.0427; found 326.0429.

### 2-chloro-adenosine-2'-arabino-fluoro-ribose (**30**)

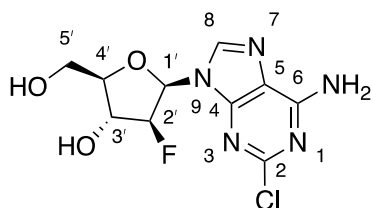

Prepared using the general enzymatic nucleoside transglycosylation procedure A. A 50 mM nucleobase stock solution (9 mg dissolved in 1068 μL) in mQ H<sub>2</sub>O (5.0 μmol, 200 μL, 1 equiv) was mixed with a 100 mM 1-(2-Deoxy-2-fluoro-β-D-arabinofuranosyl)uracil solution (246 mg in 10 mL), which was dissolved in mQ H<sub>2</sub>O (40.0 μmol, 800 μL, 8 equiv). Next, 1 mL of NDT stock solution (2 mg/mL) was added to afford a final volume of 2 mL and the resulting reaction mixture was shaken at 950 rpm at 40 °C for 24 h. The crude reaction mixture was purified by preparative HPLC (method D) affording the target nucleoside (**30**).

**<sup>1</sup>H NMR** (400 MHz, (CD<sub>3</sub>)<sub>2</sub>SO, ppm) δ 8.27 (d, *J* = 2.1 Hz, 1H, *H*<sup>8</sup>), 7.88 (s, 2H, *NH*<sub>2</sub>), 6.33 (dd, *J* = 13.8, 4.6 Hz, 1H, *H*<sup>1'</sup>), 5.96 (d, *J* = 5.1 Hz, 1H, *OH*<sup>3</sup>), 5.37 – 5.13 (m, 1H, *H*<sup>2'</sup>), 5.08 (t, *J* =

5.7 Hz, 1H,  $OH^5$ ), 4.43 (*app* dq,  $J = 18.9, 4.8$  Hz, 1H,  $H^3$ ), 3.90 – 3.81 (m, 1H,  $H^4$ ), 3.75 – 3.59 (m, 2H,  $H^5$  and  $H^{5'}$ ).

$^{13}C\{^1H\}$ -NMR (101 MHz,  $(CD_3)_2SO$ , ppm)  $\delta$  157.3 ( $C^2$  or  $C^6$ ), 153.7 ( $C^2$  or  $C^6$ ), 150.6 ( $C^5$  or  $C^4$ ), 140.5 (d,  $J = 4.4$  Hz,  $C^8$ ), 117.8 ( $C^5$  or  $C^4$ ), 95.8 (d,  $J = 192.1$  Hz,  $C^2$ ), 84.0 (d,  $J = 5.6$  Hz,  $C^4$ ), 81.9 (d,  $J = 16.9$  Hz,  $C^1$ ) 73.0 (d,  $J = 23.0$  Hz,  $C^3$ ), 60.8 ( $C^5$ ).

NMR values in agreement with literature.<sup>11</sup>

$^{19}F$  NMR (471 MHz,  $(CD_3)_2SO$ , ppm)  $\delta$  – 198.0

RP-HPLC (Method A):  $t_R = 5.63$  min, conversion 25% (std = 1).

HRMS (ESI)  $m/z$ :  $[M+Na]^+$  calcd for  $C_{10}H_{11}O_3N_5ClFNa$  326.0427; found 326.0432.

**HPLC trace – non-acceptance of 5-trifluoromethyluracil with fluorinated nucleoside donors**

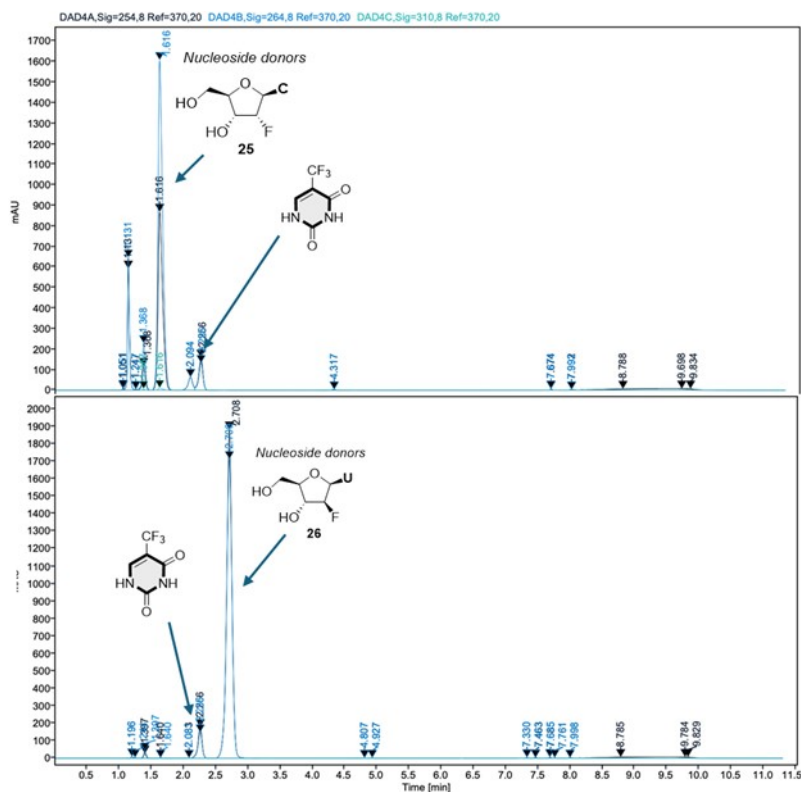

**Figure S1a** – HPL chromatogram showing no formation of the corresponding fluorinated pyrimidine nucleosides. Retention times; 2.20 min = Nucleobase **37**, 2.71 min = 2'-fluoro-arabino-uridine, 1.62 min = 2'-fluoro-cytidine.

## HPLC trace – non-acceptance of 6-dimethyladenine with fluorinated nucleoside donors

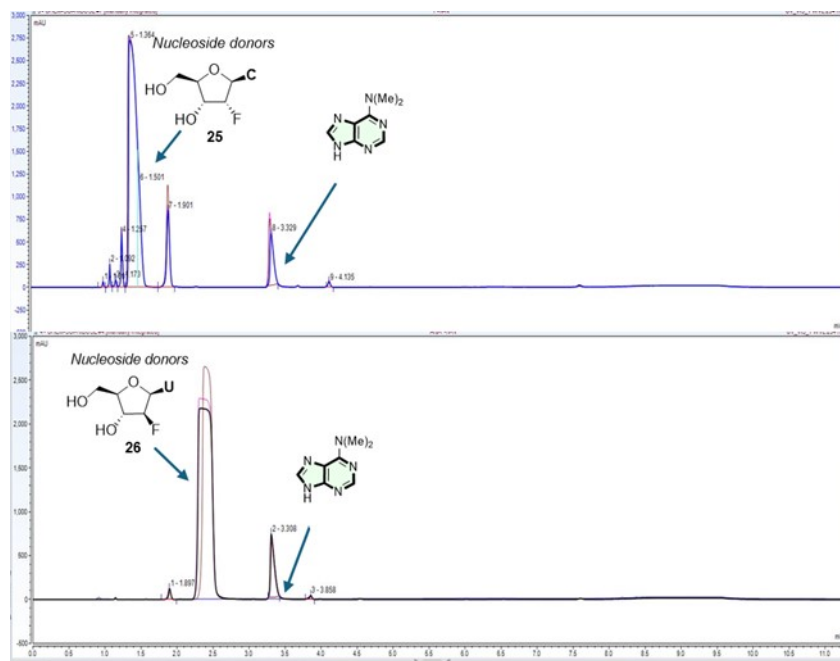

**Figure S1b** – HPL chromatogram showing no formation of the corresponding fluorinated purine nucleosides. Retention times; 2.30 min = Nucleobase **38**, 2.71 min = 2'-fluoro-arabinose-uridine, 1.62 min = 2'-fluoro-cytidine.

## 4. Protein Expression and Crystallisation

### 4.1 Expression

The coding sequence for the mutants of *Lactobacillus leichmannii* NDT (Uniprot: Q9R5V5) with an N-terminal 6-His tag, was synthesized by GenScript (with codon optimization for *Escherichia coli*) and subcloned into a pET29a+ plasmid. The plasmids were received from GenScript in the lyophilised form. Plasmid DNA was resuspended in nuclease-free water (6  $\mu$ L) according to manufacturer protocol.

Amino acid sequence of protein used in this work:

#### **L/NDT-WT**

GSSHHHHHSSGLEVLFGQPAMPKKTIFYGAGWFTDRQNKAYKEAMEALKENPTIDLENS  
YVPLDNQYKGIRVDEHPEYLHDKVWATATYNNDLNGIKTNDIMLGVIYIPDEEDVGLGMELG  
YALSQGKYVLLVIPDEDYGKPINLMSWGVSDNVIKMSQLKDFNFNKPRDFYEGAVY

#### **NDT-Mutant (Tyr7 $\rightarrow$ Phe & Asp72 $\rightarrow$ Asn)**

GSSHHHHHSSGLEVLFGQPAMPKKTIFFGAGWFTDRQNKAYKEAMEALKENPTIDLENS  
YVPLDNQYKGIKRVDEHPEYLHDKVWATATYNNLNLIKTDIMLGVIYIPDEEDVGLGMELG  
YALSQGKYVLLVIPDEDYGKPINLMSWGVSDNVIKMSQLKDFNFNKPRFDFYEGAVY

Plasmid (0.8  $\mu$ L) containing target gene pET29a+-NDT was transformed into BL21 (DE3) *E. coli* competent cells (Invitrogen) using the heat shock method. Transformants harbouring the plasmid were plated on LB agar containing 50  $\mu$ g/ mL kanamycin and incubated at 37 °C overnight. Colonies were inoculated into 10 mL LB media containing 50  $\mu$ g/ mL kanamycin and grown overnight at 37 °C while shaking gently at 200 rpm. Overnight transformants were used to inoculate 450 mL of LB media supplemented with 50  $\mu$ g/ mL kanamycin into an OD of 0.01 and incubated at 37 °C, 200 rpm until reaching an OD of ~0.4. When OD reached ~0.4 cells were induced with IPTG (0.5 mM, 2.5 mL) solution for 3 hours. The cells were harvested by centrifugation (10,000 x g for 20 min at 4 °C) and the supernatant was discarded. The cell pellet was resuspended in 10 mM sodium phosphate buffer pH 7 (~10 mL buffer per 1 g of cell pellet). The resuspended cell pellets were lysed using a French press. The resulting cell lysate was separated by centrifugation (10,000 g, 30 mins, 4 °C) and the supernatant collected.

#### 4.2 Purification of L/NDT-WT

Binding Buffer (Buffer A): 10 mM sodium phosphate, 10 mM imidazole, 100 mM NaCl, pH 7.0

Binding Buffer (Buffer B): 10 mM sodium phosphate, 500 mM imidazole, 100 mM NaCl, pH 7.0.

The collected supernatant was filtered through a 0.45  $\mu$ M PES filter and the proteins were purified by affinity chromatography. A 5 mL His trap FF column (GE Healthcare 17525501) was fitted on an Akta Pure protein purification system and equilibrated with 5 column volumes (CV) of binding buffer A before the supernatant of the cell lysate was loaded on to the column. The flow-through was collected as the non-absorbed fraction (NAF). The column was then washed with binding buffer A for 13 CV and when the UV absorbance was stable the protein was eluted with a gradient of imidazole (Buffer B 0-100%) over 17 CV. The fractions were analysed by SDS-PAGE.

General SDS-PAGE conditions involved mixing the sample with appropriate amount of 4X SDS dye and loaded into wells of Novex<sup>TM</sup> 4-20% Tris-Glycine Mini-Gels 50:50. Gels were



run in 1x running buffer for 60 minutes at 140 V. SDS-PAGE gels were stained in Coomassie Blue for 1 hour prior to de-staining overnight at room temperature, on a shaking-platform.

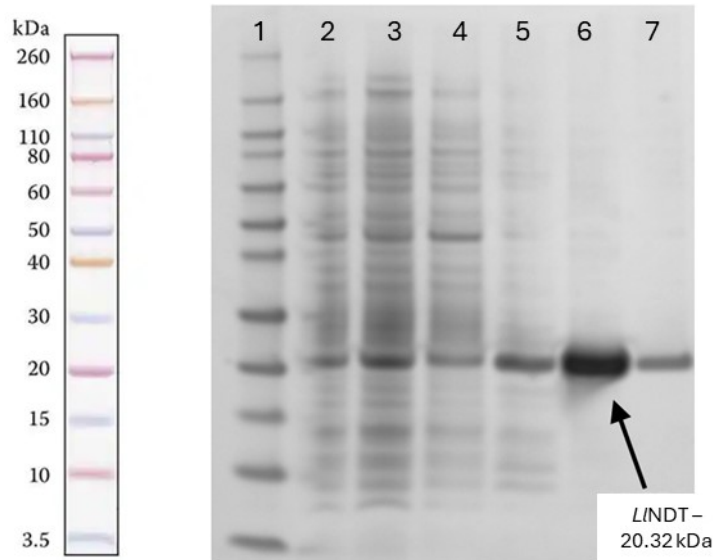

**Figure S2a** – HisTRAP FF SDS PAGE gel – lane order, 1 = Marker, 2 = flow through, 3 = flow through, 4 = column wash, 5 = pure NDT fraction, 6 = pure NDT fraction, 7 = post fraction wash out.

Appropriate fractions were pooled together, and 200  $\mu$ L (400 units) of HRV 3C protease was added and dialysed over 48 hours at 4  $^{\circ}$ C into 20 mM sodium phosphate, 100 mM NaCl, pH 7.0 for his tag removal. His tag cleavage was monitored and analysed by SDS-PAGE. Once his cleavage was complete, fractions were pooled and loaded onto a 5 mL His trap FF column (GE Healthcare 17525501) using a Akta Pure protein purification system. The system was once again equilibrated with 5 column volumes of binding buffer A before loading of the pooled fractions. The flow-through was collected as the non-absorbed fraction containing the cleaved LINDT protein. This was confirmed once again by SDS-PAGE, before appropriate fractions were applied to a 5,000 MW Amicon Centrifugal filter unit to be concentrated (10 mg/mL) and calculated by nanodrop.

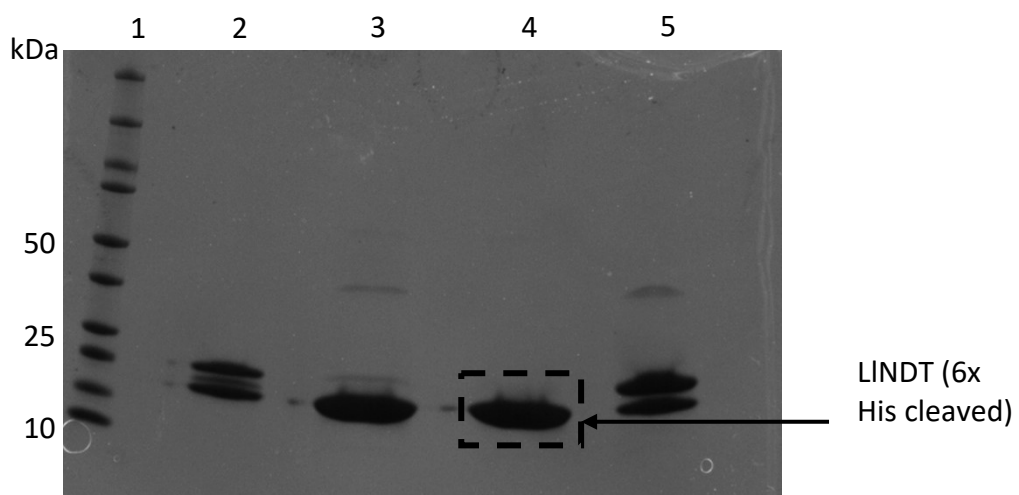

**Figure S2b** – SDS PAGE gel – lane order: 1 = ladder, 2 = HRV 3C protease histag removal after 24 hours, 3 = HRV 3C protease histag removal after 48 hours, 4 = pooled fractions after the second IMAC following histag removal, 5= HRV 3C protease histag removal after 30 hours.

For crystallization studies, pooled fractions were additionally purified by SEC using the following protocol (SEC buffer: 20 mM sodium phosphate, 100 mM NaCl, pH 7.0). A Superdex 200 prep grade 16/60 Size Exclusion chromatography (SEC) column was equilibrated with SEC buffer and loaded with 2.5 mL aliquots of the His Trap concentrate (10 mg/mL). The column was eluted with SEC buffer with 1 mL fractions collected and analysed by SDS-PAGE. Fractions containing NDT were concentrated using a 5,000 MW Amicon Centrifugal filter unit to 1.5 mL at a concentration of 21 mg/mL, with 0.75 mL in 10 % glycerol (20 mM sodium phosphate, 100 mM NaCl, pH 7.0) and an alternative 0.75 mL in 20 mM sodium phosphate, 100 mM NaCl, pH 7.0. This was flash frozen with N<sub>2</sub> (l) and stored at 20°C.

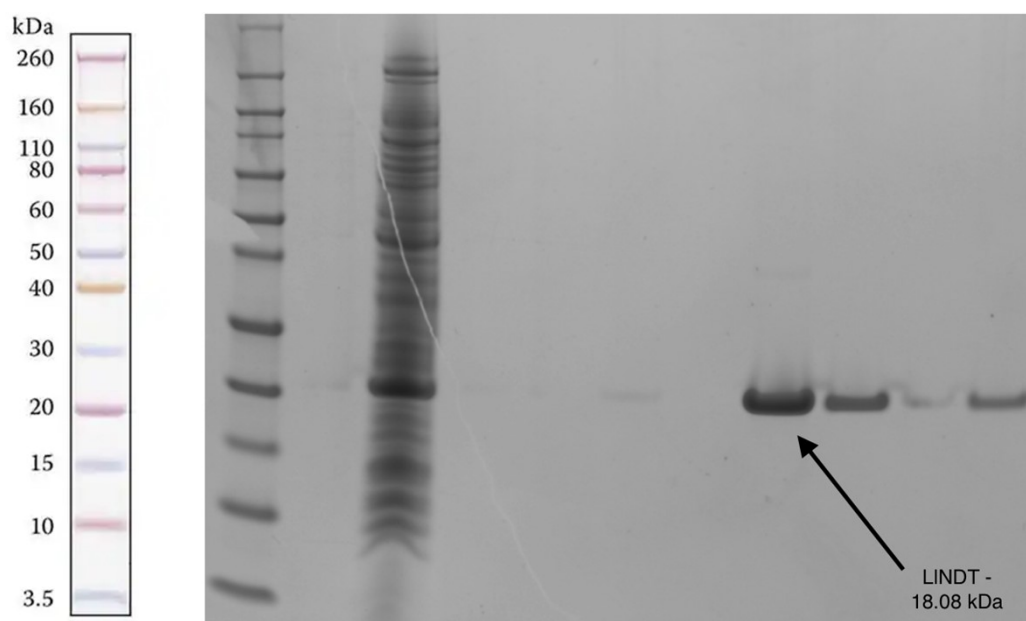

**Figure S2c** - Size exclusion chromatography (SEC) SDS PAGE gel – lane order, blank, HisTrap flow through, blank, HisTrap elution, blank, SEC pure fraction, SEC pure fraction, blank, SEC pure fraction.

### 4.3 Purification of NDT-Y7F/D72N

Binding Buffer (Buffer A): 10 mM sodium phosphate, 10 mM imidazole, 100 mM NaCl, pH 7.0

Binding Buffer (Buffer B): 10 mM sodium phosphate, 500 mM imidazole, 100 mM NaCl, pH 7.0.

The collected supernatant was filtered through a 0.45  $\mu$ M PES filter and the proteins were purified by affinity chromatography. A 5 mL HisTrap FF column (GE Healthcare 17525501) was fitted on an Akta Pure protein purification system and equilibrated with 5 column volumes (CV) of binding buffer A before the supernatant of the cell lysate was loaded on to the column. The flow-through was collected as the non-absorbed fraction (NAF). The column was then washed with binding buffer A for 13 CV and when the UV absorbance was stable the protein was eluted with a gradient of imidazole (Buffer B 0-100%) over 17 CV. The fractions were analysed by SDS-PAGE.

Appropriate fractions were pooled together, and 500  $\mu$ L (400 units) of HRV 3C protease was added and dialysed over 24 hours at 4 °C into 20 mM sodium phosphate, 100 mM NaCl, pH 7.0 for his tag removal. His tag cleavage was monitored and analysed by SDS-PAGE. Once his tag cleavage was complete, fractions were pooled and loaded onto a 5 mL His trap FF column (GE Healthcare 17525501) using a Akta Pure protein purification system. The system was once again equilibrated with 5 column volumes of binding buffer A before loading of the pooled fractions. The flow-through was collected as the non-absorbed fraction containing the cleaved LINDT protein. This was confirmed once again by SDS-PAGE, before appropriate fractions were applied to a 5,000 MW Amicon Centrifugal filter unit to be concentrated (10 mg/mL) and calculated by nanodrop.

For crystallization studies, pooled fractions were additionally purified by SEC using the following protocol (SEC buffer: 20 mM sodium phosphate, 100 mM NaCl, pH 7.0). A Superdex 200 prep grade 16/60 Size Exclusion chromatography (SEC) column was equilibrated with SEC buffer and loaded with 10 mL of the His Trap concentrate (10 mg/mL). The column was eluted with SEC buffer with 1 mL fractions collected and analysed by SDS-PAGE. Fractions containing NDT were concentrated using a 5,000 MW Amicon Centrifugal filter unit to 4 mL at a concentration of 12 mg/mL, with 2 mL in 10 % glycerol (20 mM sodium phosphate, 100 mM NaCl, pH 7.0) and an alternative 2 mL in 20 mM sodium phosphate, 100 mM NaCl, pH 7.0. This was flash frozen with N<sub>2</sub> (l) and stored at 20°C.

General SDS-PAGE conditions involved mixing the sample with appropriate amount of 4X SDS dye and loaded into wells of Novex™ 4-20% Tris-Glycine Mini-Gels 50:50. Gels were run in 1x running buffer for 60 minutes at 140 V. SDS-PAGE gels were stained in Coomassie Blue for 1 hour prior to de-staining overnight at room temperature, on a shaking-platform.

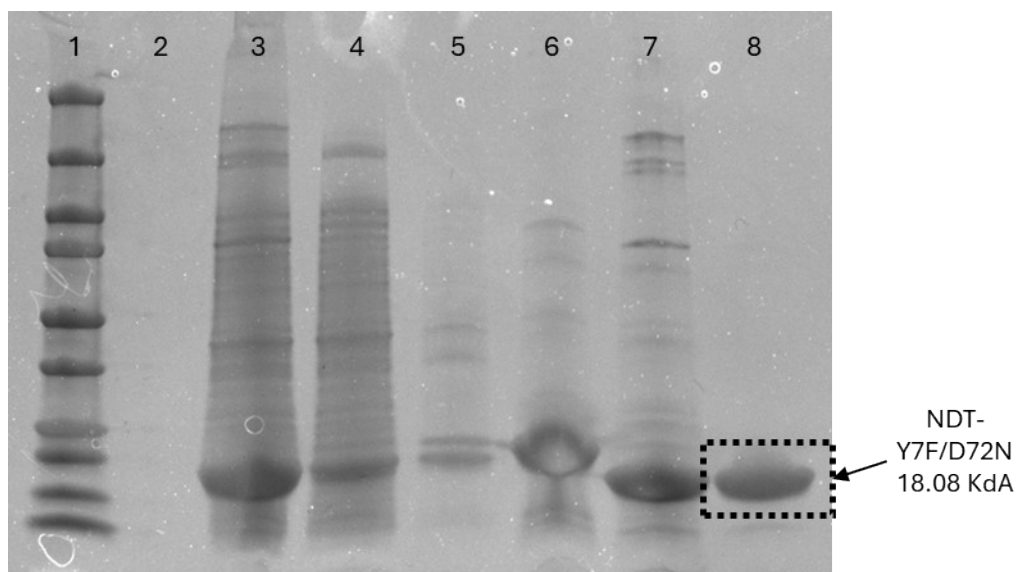

**Figure S3** – SDS PAGE gel of the three mutants expressed. Lane 1 = ladder, lane 2 = empty, lane 3 = NDT-C lysate, lane 4 = NDT-C Histrap flow through, lane 5 = Histrap wash, lane 6 = NDT-C histrap fraction pooled, lane 7 = NDT-C cleaved with HRVC 3C, lane 8 = NDT-C following histrap cleavage, IMAC and SEC

#### 4.4 Crystallisation

*L*/NDT-2 and the Y7F/D72N mutant were concentrated to 21 mg mL<sup>-1</sup> and 12 mg mL<sup>-1</sup> respectively, in 20 mM NaH<sub>2</sub>PO<sub>4</sub> pH 7.0 buffer with 100 mM NaCl. Crystals were grown in drops containing 500 nL protein and 500 nL mother liquor. Crystals of *L*/NDT-2 were obtained in drops containing 35 % Tacsimate pH 7.0, and crystals of the Y7F/D72N mutant were obtained in drops containing 25 % Tacsimate pH 7.0. Crystals were soaked in their mother liquor containing 10 % ethylene glycol and 10 mM cytidine, which had been derived from a 100 mM stock solution in DMSO.

#### 4.5 Data Collection and Refinement

The datasets described were collected at the Diamond Light Source, Didcot, Oxfordshire U.K. on beamline I03. Data were processed and integrated using XDS<sup>12</sup> and scaled using SCALA<sup>13</sup> included in the Xia2 processing system<sup>14</sup>. Data collection statistics are provided in Table S1. Crystals for all Datasets were obtained in space group *I*2<sub>1</sub>3, with approximately the same cell dimensions and with two molecules in the asymmetric unit that constituted one third of the *L*/NDT-2 hexamer. The structures of *L*/NDT-2 were solved by molecular replacement using MOLREP<sup>15</sup> with the monomer of LLNDT (PDB code 1F8Y<sup>16</sup>) as the model. The structures were built and refined using iterative cycles in Coot<sup>17</sup> and REFMAC<sup>18</sup>, employing local NCS restraints in the refinement cycles. Following building and refinement of the protein and water

molecules in the structural complexes, residual density was observed in the omit maps at the active sites. For the WT enzyme, this could be modelled as the ribosylated enzyme with cytosine; modelling and refinement with intact cytidine gave rise to negative density between these species. For the Y7F/D72N mutant, the density was successfully modelled as cytidine.

The final structures of the ribosylated-WT/cytosine and Y7F/D72N-cytidine complexes gave  $R_{\text{crist}}/R_{\text{free}}$  values of 0.19/0.22 and 0.16/0.19 respectively. Refinement statistics for the structures are presented in Table S1. The coordinates and structure factors have been deposited in the Protein Databank as **ribosylated-WT-L/NDT-2/cytosine (PDB code 9GN2)**, and **L/NDT-2-Y7F/D72N-cytidine (PDB code 9GN4)** respectively.

**Table S1: Data collection and refinement statistics for datasets in this manuscript. Numbers in brackets refer to data for highest resolution shells.**

|                                                | <b>LLNDT-2 ribosylated with cytosine</b>                    | <b>LLNDT-2 Y7F/D72N with cytidine</b>                       |
|------------------------------------------------|-------------------------------------------------------------|-------------------------------------------------------------|
| Beamline                                       | I03                                                         | I03                                                         |
| Wavelength (Å)                                 | 0.976269                                                    | 0.976277                                                    |
| Resolution (Å)                                 | 60.82-2.41 (2.50-2.41)                                      | 61.29 – 2.48 (2.58-2.48)                                    |
| Space Group                                    | I2 <sub>1</sub> 3                                           | I2 <sub>1</sub> 3                                           |
| Unit cell (Å)                                  | a = b = c = 148.98; $\alpha = \beta = \gamma = 90.00^\circ$ | a = b = c = 150.13; $\alpha = \beta = \gamma = 90.00^\circ$ |
| No. of molecules in the asymmetric unit        | 2                                                           | 2                                                           |
| Unique reflections                             | 21394 (2231)                                                | 20103 (2256)                                                |
| Completeness (%)                               | 100.0 (100.0)                                               | 100.0 (100.0)                                               |
| $R_{\text{merge}}$ (%)                         | 0.07 (1.65)                                                 | 0.16 (1.56)                                                 |
| $R_{\text{p.i.m.}}$                            | 0.02 (0.37)                                                 | 0.04 (0.34)                                                 |
| Multiplicity                                   | 40.5 (40.6)                                                 | 41.6 (43.5)                                                 |
| $\langle I/\sigma(I) \rangle$                  | 35.0 (3.0)                                                  | 26.1 (3.9)                                                  |
| Overall $B$ from Wilson plot (Å <sup>2</sup> ) | 68                                                          | 47                                                          |
| $CC_{1/2}$                                     | 1.00 (0.87)                                                 | 1.00 (0.90)                                                 |
| $R_{\text{crist}}/R_{\text{free}}$ (%)         | 0.19/0.22                                                   | 0.16/0.19                                                   |
| r.m.s.d 1-2 bonds (Å)                          | 0.007                                                       | 0.008                                                       |
| r.m.s.d 1-3 angles (°)                         | 1.69                                                        | 1.70                                                        |

|                                    |    |    |
|------------------------------------|----|----|
| Avg main chain B (Å <sup>2</sup> ) | 69 | 51 |
| Avg side chain B (Å <sup>2</sup> ) | 76 | 57 |
| Avg waters B (Å <sup>2</sup> )     | 69 | 54 |
| Avg Ligand B (Å <sup>2</sup> )     | 87 | 67 |

## 5. Mutant NDT-Y7F/D72N Transglycosylation conversions

### 5.1 Ribose transglycosylations using NDT-Y7F/D72N

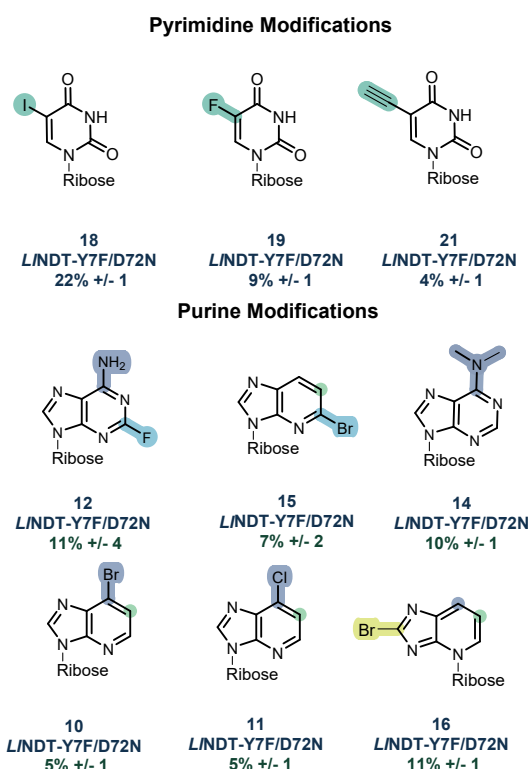

**Figure S4** – Scope reactions using mutant *L*/NDT-Y7F/D72N

*L*/NDT-Y7F/D72N reaction conditions were replicated using existing conditions for *L*/NDT-WT. General reaction conditions: **7** or **8** (5-10 equiv.), nucleobase (1 equiv.), solvent (DMSO:H<sub>2</sub>O, 1:4), *L*/NDT-2 (100 to 300 μg/mL).

## 6. Synthesis of 2' and 3' modified nucleosides for substrate scope transglycosylation investigations

### 6.1 Synthesis of 2',3' -dideoxy-3'-thiothymidine (31)

Intermediate **38** was synthesized according to literature protocols<sup>19</sup> followed by deprotection in acidic conditions yielding the intermediate **39** (Scheme S1). Deacylation by aminolysis with 40 % methylamine afforded **31**.

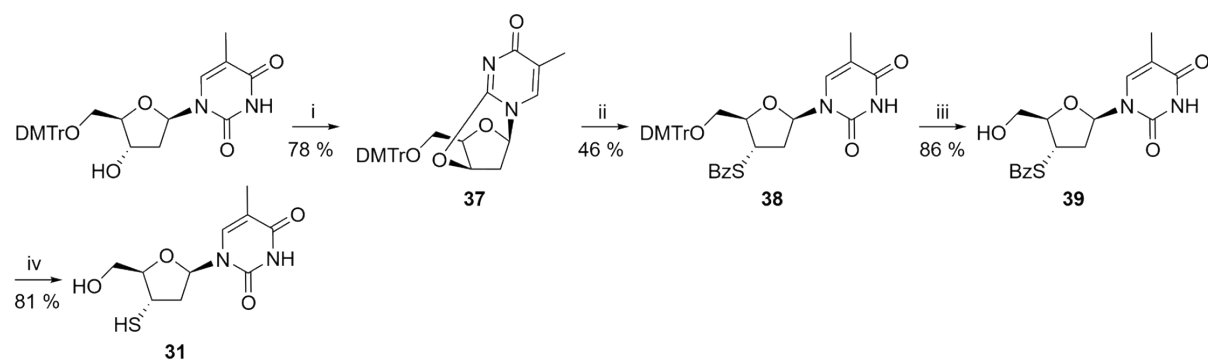

**Scheme S1.** Synthesis of **31**. Conditions: i) PPh<sub>3</sub>, EtOAc, DIAD, r.t., 16 h; ii) NaSBz, DMF, 100 °C, 24 h; iii) conc. HCl/MeOH, HO(CH<sub>2</sub>)<sub>2</sub>SH, DCM, rt 5 min; iv) 40 % MeNH<sub>2</sub> (aq), rt, 16 h.

**5'-O-(4,4'-dimethoxytrityl)-2,3'-anhydrothymidine (37).** To a solution of 5'-O-(4,4'-dimethoxytrityl)-thymidine (9.0 g, 16.5 mmol) and PPh<sub>3</sub> (4.8 g, 18.2 mmol) in EtOAc (45 mL) was added dropwise diisopropyl azodicarboxylate (3.6 mL, 18.2 mmol) over 12 min and the resulting solution was stirred at rt for 16 h. The reaction solution was concentrated under a vacuum and the residue was purified by flash silica column chromatography eluting with a gradient of 2 % to 20 % MeOH: EtOAc in affording **37** (6.8 g, 78 %) as a white solid. <sup>1</sup>H NMR (400 MHz, (CD<sub>3</sub>)<sub>2</sub>SO) δ 7.63 (d, *J* = 1.2 Hz, 1H), 7.41 – 7.33 (m, 2H), 7.32 – 7.15 (m, 7H), 6.88 – 6.83 (m, 4H), 5.89 (d, *J* = 3.8 Hz, 1H), 5.33 – 5.28 (m, 1H), 4.41 (ddd, *J* = 7.7, 4.9, 2.5 Hz, 1H), 3.73 (s, 3H), 3.72 (s, 3H), 3.16 – 3.03 (m, 2H), 2.62 – 2.54 (m, 1H), 2.49 – 2.42 (m, 1H), 1.78 (d, *J* = 1.2 Hz, 3H). <sup>13</sup>C{<sup>1</sup>H} NMR (101 MHz, (CD<sub>3</sub>)<sub>2</sub>SO) δ 170.7, 158.1, 158.0, 153.3, 144.6, 136.7, 135.2, 135.0, 129.6 (4C), 127.8 (2C), 127.6 (2C), 126.6, 116.1, 113.2 (2C), 113.2 (2C), 86.8, 85.8, 83.5, 77.1, 62.3, 55.0 (2C), 32.7, 13.0. HRMS (ESI): *m/z* [M+H]<sup>+</sup> calcd for C<sub>31</sub>H<sub>31</sub>N<sub>2</sub>O<sub>6</sub><sup>+</sup> 527.2177, found 527.2170.

**3'-deoxy-3'-α-benzylthio-5'-O-(4,4'-dimethoxytrityl)thymidine (38).** Sodium thiobenzoate (15.0 g, 93.7 mmol) was added to a solution of **37** (6.7 g, 12.7 mmol) in anhydrous DMF (38 mL) and the reaction solution was stirred at 100 °C for 24 h. The reaction mixture was cooled to rt and diluted with EtOAc (100 mL). The solution was washed with saturated NaHCO<sub>3</sub> (2 x 90 mL) and brine (2 x 90 mL), dried with Na<sub>2</sub>SO<sub>4</sub> and evaporated to dryness under a vacuum. The crude material was purified by flash silica column chromatography eluting with a gradient of 0 % to 2 % MeOH in DCM affording **38** (3.9 g, 46 %) as a pale-yellow solid. <sup>1</sup>H NMR (400 MHz, CD<sub>3</sub>CN) δ 9.22 (s, 1H), 7.94 – 7.87 (m, 2H), 7.71 – 7.62 (m, 1H), 7.58 (d, *J* = 1.3 Hz, 1H), 7.54 – 7.43 (m, 4H), 7.35 – 7.15 (m, 7H), 6.84 – 6.78 (m, 4H), 6.18 (dd, *J* = 7.2, 4.7 Hz,

1H), 4.44 (q,  $J = 8.4$  Hz, 1H), 4.13 – 4.09 (m, 1H), 3.71 (s, 3H), 3.70 (s, 3H), 3.44 – 3.32 (m, 2H), 2.70 (ddd,  $J = 13.7, 8.8, 4.7$  Hz, 1H), 2.48 (ddd,  $J = 14.1, 8.2, 7.2$  Hz, 1H), 1.56 (d,  $J = 1.3$  Hz, 3H).  $^{13}\text{C}\{^1\text{H}\}$  NMR (101 MHz,  $\text{CD}_3\text{CN}$ )  $\delta$  190.2, 163.8, 158.8, 158.7, 150.4, 144.9, 136.4, 135.8, 135.7, 135.6, 134.1, 130.1 (2C), 129.0 (2C), 128.0 (2C), 127.9 (2C), 127.1 (4C), 126.9, 113.1 (4C), 110.3, 86.5, 84.5, 83.6, 62.6, 54.9 (2C), 39.6, 38.3, 11.5. HRMS (ESI):  $m/z$   $[\text{M}+\text{Na}]^+$  calcd for  $\text{C}_{38}\text{H}_{36}\text{N}_2\text{NaO}_7\text{S}^+$  687.2135, found 687.2139.

**3'-deoxy-3'- $\alpha$ -benzylthio-thymidine (39).** **38** (3.8 g, 5.7 mmol) and mercaptoethanol (600  $\mu\text{L}$ , 8.5 mmol) were dissolved in DCM (40 mL) and the solution was titrated with conc. HCl/MeOH (1:9) (200  $\mu\text{L}$ ) until complete detritylation was observed on TLC (10 % MeOH in DCM). The reaction solution was diluted with DCM (100 mL) and the organic phase was washed with saturated  $\text{NaHCO}_3$  (80 mL) and brine (80 mL), dried with  $\text{Na}_2\text{SO}_4$  and evaporated to dryness under a vacuum. The crude material was purified by flash silica column chromatography eluting with a gradient of 0 % to 3 % MeOH in DCM to afford **39** (2.0 g, 86 %) as pale-yellow solid.  $^1\text{H}$  NMR (400 MHz,  $(\text{CD}_3)_2\text{SO}$ )  $\delta$  11.33 (s, 1H), 7.95 – 7.89 (m, 2H), 7.85 (d,  $J = 1.3$  Hz, 1H), 7.76 – 7.66 (m, 1H), 7.61 – 7.54 (m, 2H), 6.16 (dd,  $J = 6.8, 5.6$  Hz, 1H), 5.24 (app t,  $J = 5.3$  Hz, 1H), 4.26 – 4.18 (m, 1H), 4.07 – 3.99 (m, 1H), 3.78 – 3.69 (m, 1H), 3.69 – 3.59 (m, 1H), 2.66 – 2.56 (m, 1H), 2.44 – 2.34 (m, 1H), 1.81 (d,  $J = 1.2$  Hz, 3H).  $^{13}\text{C}\{^1\text{H}\}$  NMR (101 MHz,  $(\text{CD}_3)_2\text{SO}$ )  $\delta$  190.8, 164.2, 150.9, 136.6, 136.4, 134.7, 129.7 (2C), 127.4 (2C), 109.9, 85.0, 84.3, 61.3, 40.3, 38.5, 12.8. HRMS (ESI):  $m/z$   $[\text{M}+\text{H}]^+$  calcd for  $\text{C}_{17}\text{H}_{19}\text{N}_2\text{O}_5\text{S}^+$  363.1009, found 363.1015.

**3'-deoxy-3'- $\alpha$ -thiothymidine (31).** **39** (1.9 g, 5.2 mmol) was dissolved in 40 % aqueous methylamine (45 mL) under nitrogen and the reaction solution was stirred at r.t. for 16 h. Ethanol (20 mL) was added, and the resulting mixture was concentrated under a vacuum. The crude material was purified by flash silica column chromatography eluting with gradient of 0 % to 10 % MeOH in DCM affording **31** (1.1 g, 81 %) as a white solid.  $^1\text{H}$  NMR (400 MHz, MeOD)  $\delta$  7.95 (d,  $J = 1.2$  Hz, 1H), 6.13 (dd,  $J = 7.2, 2.9$  Hz, 1H), 3.95 (m, 1H), 3.90 – 3.76 (m, 3H), 3.44 (ddd,  $J = 10.2, 8.8, 7.8$  Hz, 1H), 2.55 (ddd,  $J = 13.7, 7.8, 2.9$  Hz, 1H), 2.37 (ddd,  $J = 13.8, 10.2, 7.2$  Hz, 1H), 1.89 (d,  $J = 1.2$  Hz, 3H).  $^{13}\text{C}\{^1\text{H}\}$  NMR (101 MHz, MeOD)  $\delta$  166.5, 152.3, 138.3, 111.0, 90.6, 85.7, 60.4, 44.1, 34.6, 12.5. HRMS (ESI):  $m/z$   $[\text{M}+\text{H}]^+$  calcd for  $\text{C}_{10}\text{H}_{15}\text{N}_2\text{O}_4\text{S}^+$  259.0747, found 259.0755.

## 6.2 Synthesis of 2'-amino-2',3'-dideoxyuridine (32)



The intermediate **43** was synthesized from 5'-(4,4'-dimethoxytrityl)uridine using a reported procedure<sup>20</sup> followed by Staudinger reduction to afford **32** (Scheme S2).

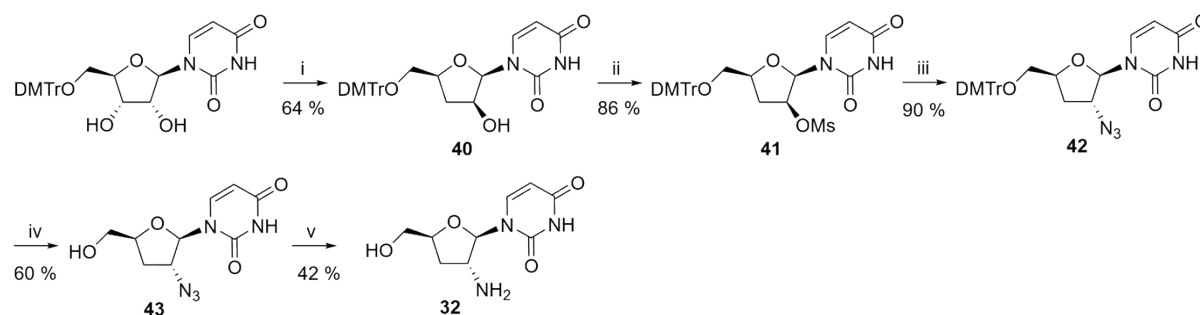

**Scheme S2.** Synthesis of **32**. Conditions: i) (1) pivaloyl chloride, pyridine, 0 °C, 1h, (2) MsCl, 0 °C, 1 h, (3) NaBH<sub>4</sub>, KOH, MeOH, 0 °C, 16 h; ii) MsCl, pyridine, rt 16 h; iii) NaN<sub>3</sub>, DMF, 110 °C, 16 h; iv) conc. HCl/MeOH, HO(CH<sub>2</sub>)<sub>2</sub>SH, DCM, rt 30 min; v) PPh<sub>3</sub>, 1,4-dioxane/H<sub>2</sub>O, rt, 16 h.

*1-(3-deoxy-5-O-(4,4'-dimethoxytrityl)-β-D-threo-pentofuranosyl)-uracil* (**40**). 5'-(4,4'-dimethoxytrityl)uridine (5.9 g, 10.8 mmol) was dissolved in anhydrous pyridine (64 mL) under nitrogen and the resulting solution was cooled to 0 °C. To this solution, pivaloyl chloride (2.3 mL, 18.4 mmol) was added dropwise, and the resulting mixture was stirred at 0 °C for 1 h. Methanesulfonyl chloride (3.4 mL, 43.3 mmol) was added and stirring was continued at 0 °C for 1h and then at rt for further 3 h. The reaction was quenched by adding 50 % aqueous pyridine (4.3 mL) at 0 °C and the mixture was partitioned between chloroform (300 mL) and water (100 mL). The organic phase was washed with saturated NaHCO<sub>3</sub> (80 mL) and brine (80 mL), dried with Na<sub>2</sub>SO<sub>4</sub> and evaporated to dryness under a vacuum. The crude material was dissolved in MeOH (43 mL), and the solution was cooled to 0 °C followed by addition of a 1 M solution of KOH in MeOH (32 ml, 32 mmol) and NaBH<sub>4</sub> (820 mg, 21.7 mmol). The reaction mixture was stirred at rt for 16 h and quenched by adjusting the pH to 7 – 8 with MeOH/conc. HCl (9:1 v/v). To the mixture was added DCM (200 mL) and the organic phase was washed with water (3 x 50 mL), dried with Na<sub>2</sub>SO<sub>4</sub> and evaporated to dryness under a vacuum. The crude material was purified by flash silica column chromatography eluting with a gradient of 1 % to 5 % MeOH in DCM containing 0.2 % triethylamine to afford **40** (3.7 g, 64 %) as a white solid. <sup>1</sup>H NMR (400 MHz, DMSO) δ 11.25 (s, 1H), 7.56 (d, *J* = 8.1 Hz, 1H), 7.44 – 7.17 (m, 9H), 6.93 – 6.87 (m, 3H), 5.91 (d, *J* = 4.9 Hz, 1H), 5.37 (d, *J* = 4.6 Hz, 1H), 5.35 (d, *J* = 8.1 Hz, 1H), 4.37 – 4.29 (m, 1H), 4.19 – 4.11 (m, 1H), 3.74 (s, 6H), 3.28 – 3.22 (m, 1H), 3.21 – 3.13 (m, 1H), 2.33 – 2.23 (m, 1H), 1.78 – 1.68 (m, 1H). <sup>13</sup>C{<sup>1</sup>H} NMR (101 MHz, DMSO) δ 163.2, 158.1 (2C), 150.5, 144.8, 142.0, 135.5, 135.4, 129.7 (2C), 129.7 (2C), 127.9 (2C), 127.7 (2C), 126.7, 113.2 (4C), 99.8, 85.6, 85.5, 75.8, 69.2, 65.0, 55.0 (2C), 34.6. HRMS (ESI): *m/z* [M+H]<sup>+</sup> calcd for C<sub>30</sub>H<sub>31</sub>N<sub>2</sub>O<sub>7</sub><sup>+</sup> 531.2126, found 531.2112.

*1-(3-deoxy-5-O-(4,4'-dimethoxytrityl)-2-O-methanesulfonyl-β-D-erythro-pentofuranosyl)-uracil* (**41**). Under nitrogen, methanesulfonyl chloride (1.6 mL, 20.5 mmol) was added to a solution of **40** (3.6 g, 6.8 mmol) in anhydrous pyridine (20 mL) and the mixture was stirred at rt for 16 h. The reaction was quenched at 0 °C with 50 % aqueous pyridine (7 mL). The mixture was partitioned between DCM (50 mL) and water (30 mL) and the organic phase was washed with saturated NaHCO<sub>3</sub> (30 mL) and brine (30 mL), dried with Na<sub>2</sub>SO<sub>4</sub> and evaporated to dryness under a vacuum. The crude material was purified by flash silica column chromatography eluting with a gradient from 0 % to 2 % MeOH in DCM containing 0.2 % triethylamine to afford **41** (3.58 g, 86 %) as a pale-yellow solid. <sup>1</sup>H NMR (400 MHz, DMSO) δ 11.39 (d, *J* = 2.2 Hz, 1H), 7.53 (d, *J* = 8.1 Hz, 1H), 7.44 – 7.30 (m, 4H), 7.30 – 7.22 (m, 5H), 6.96 – 6.86 (m, 4H), 6.12 (d, *J* = 4.8 Hz, 1H), 5.44 (dd, *J* = 8.1, 2.2 Hz, 1H), 5.34 (dt, *J* = 6.9, 4.9 Hz, 1H), 4.30 – 4.21 (m, 1H), 3.74 (s, 6H), 3.26 (d, *J* = 4.5 Hz, 2H), 3.13 (s, 3H), 2.65 – 2.54 (m, 1H), 2.16 – 2.05 (m, 1H). <sup>13</sup>C{<sup>1</sup>H} NMR (101 MHz, DMSO) δ 162.9, 158.1 (2C), 150.2, 144.7, 140.6, 135.4, 135.3, 129.8 (2C), 129.7 (2C), 127.9 (2C), 127.7 (2C), 126.8, 113.3 (4C), 101.0, 85.7, 83.6, 77.7, 75.7, 64.2, 55.0 (2C), 37.5, 32.5. HRMS (ESI): *m/z* [M+H]<sup>+</sup> calcd for C<sub>31</sub>H<sub>33</sub>N<sub>2</sub>O<sub>9</sub>S<sup>+</sup> 609.1901, found 609.1910.

*1-(2-Azido-2,3-dideoxy-5-O-(4,4'-dimethoxytrityl)-β-D-erythro-pentofuranosyl)-uracil* (**42**). Under nitrogen, sodium azide (1.1 g, 17.2 mmol) was added to a solution of **41** (3.5 g, 5.7 mmol) in anhydrous DMF (50 mL), and the resulting mixture was stirred at 110 °C for 16 h. After cooling to rt, the mixture was diluted with a mixture of Et<sub>2</sub>O (300 mL) and DCM (60 mL). The organic solution was washed with water (5 x 100 mL) and dried with Na<sub>2</sub>SO<sub>4</sub> and evaporated to dryness under a vacuum. The crude material was purified by flash silica column chromatography eluting with a gradient of 0 % to 1.4 % MeOH in DCM containing 0.2 % triethylamine to afford **42** (2.9 g, 90 %) as a pale-yellow solid. <sup>1</sup>H NMR (400 MHz, DMSO) δ 11.42 (s, 1H), 7.75 (d, *J* = 8.1 Hz, 1H), 7.44 – 7.18 (m, 9H), 6.93 – 6.88 (m, 4H), 5.76 (d, *J* = 1.6 Hz, 1H), 5.23 (d, *J* = 8.1 Hz, 1H), 4.55 (dt, *J* = 6.3, 1.7 Hz, 1H), 4.38 – 4.28 (m, 1H), 3.74 (s, 6H), 3.34 – 3.24 (m, 2H), 2.26 – 2.16 (m, 1H), 2.02 – 1.93 (m, 1H). <sup>13</sup>C{<sup>1</sup>H} NMR (101 MHz, DMSO) δ 163.6, 158.6 (2C), 150.7, 145.1, 140.1, 135.8, 135.5, 130.2, 128.4 (2C), 128.2 (2C), 127.3, 113.8 (2C), 113.7 (2C), 101.5, 90.2, 86.4, 80.2, 66.1, 63.7, 55.5 (2C), 31.2. HRMS (ESI): *m/z* [M+Na]<sup>+</sup> calcd for C<sub>30</sub>H<sub>29</sub>N<sub>5</sub>NaO<sub>6</sub><sup>+</sup> 578.2010, found 578.2057.

*1-(2-Azido-2,3-dideoxy-β-D-erythro-pentofuranosyl)-uracil* (**43**). **42** (2.7 g, 4.86 mmol) was dissolved in DCM and treated with mercaptoethanol (445 μL, 6.3 mmol) and MeOH/conc. HCl (9:1 v:v, 400 μL). The reaction solution was stirred at r.t. for 30 min, and then diluted with DCM (45 mL). The organic phase was extracted with H<sub>2</sub>O (5 x 50 mL), and the aqueous phase was

concentrated under a vacuum. The crude material was dry loaded to flash silica column and purified by eluting with a gradient of 1 % to 10 % MeOH in DCM to afford **43** (740 mg, 60 %) as a white solid.  $^1\text{H}$  NMR (400 MHz, DMSO)  $\delta$  11.37 (s, 1H), 7.99 (d,  $J$  = 8.1 Hz, 1H), 5.74 (d,  $J$  = 1.9 Hz, 1H), 5.60 (d,  $J$  = 8.1 Hz, 1H), 5.18 (t,  $J$  = 5.2 Hz, 1H), 4.48 (dt,  $J$  = 6.4, 2.3 Hz, 1H), 4.25 – 4.17 (m, 1H), 3.80 – 3.71 (m, 1H), 3.58 – 3.50 (m, 1H), 2.16 – 2.04 (m, 1H), 1.94 – 1.84 (m, 1H).  $^{13}\text{C}\{^1\text{H}\}$  NMR (101 MHz, DMSO)  $\delta$  163.3, 150.3, 139.8, 101.1, 89.3, 81.4, 65.7, 60.9, 30.0. HRMS (ESI):  $m/z$   $[\text{M}+\text{H}]^+$  calcd for  $\text{C}_9\text{H}_{12}\text{N}_5\text{O}_4^+$  254.0884, found 254.0899.

**2'-amino-2',3'-dideoxyuridine (32)**. Triphenylphosphine (1.38 g, 5.25 mmol) was added to a solution of **43** (700 mg, 2.8 mmol) in a mixture of 1,4-dioxane (12 mL) and  $\text{H}_2\text{O}$  (3 mL) and the reaction mixture was stirred at rt for 16 h. The mixture was partitioned between DCM and  $\text{H}_2\text{O}$ , and the aqueous phase was concentrated under a vacuum. The crude material was purified by flash C18 column chromatography eluting with gradient of 5 % to 20 % MeCN in  $\text{H}_2\text{O}$  affording **32** (281 mg, 42 %) as a colourless oil.  $^1\text{H}$  NMR (600 MHz,  $\text{D}_2\text{O}$ )  $\delta$  7.89 (d,  $J$  = 8.1 Hz, 1H), 5.87 (d,  $J$  = 8.1, 1H), 5.76 (d,  $J$  = 3.6 Hz, 1H), 4.50 (m, 1H), 3.87 (dd,  $J$  = 12.5, 3.1 Hz, 1H), 3.75 – 3.66 (m, 2H), 2.13 (dt,  $J$  = 13.2, 7.8 Hz, 1H), 2.00 – 1.92 (m, 1H).  $^{13}\text{C}\{^1\text{H}\}$  NMR (151 MHz,  $\text{D}_2\text{O}$ )  $\delta$  166.8, 152.1, 141.5, 101.7, 92.0, 80.5, 62.7, 56.0, 32.8. HRMS (ESI):  $m/z$   $[\text{M}+\text{H}]^+$  calcd for  $\text{C}_9\text{H}_{14}\text{N}_3\text{O}_4^+$  228.0979, found 228.0984.

### 6.3 Synthesis of 2'-amino-2'-deoxyuridine (33)

Intermediate **45** was synthesized from 2'-anhydrouridine according to literature protocol.<sup>21</sup> Deprotection of **45** in acidic conditions afforded **33** (Scheme S3).

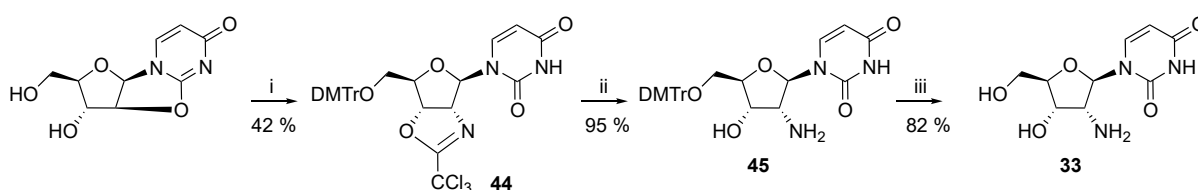

**Scheme S3.** Synthesis of **33**. Conditions: i) (1) DMTTrCl, DMAP, Py/DMF, rt, 16 h, (2)  $\text{CCl}_3\text{CN}$ , TEA, 95  $^\circ\text{C}$ , 18 h, ii) (1) NaOH, EtOH, 100  $^\circ\text{C}$ , 16 h, iii) TCA,  $\text{HO}(\text{CH}_2)_2\text{SH}$ , DCM, rt 1 h.

**5'-O-(4,4'-dimethoxytrityl)-2'-N,3'-O-(2-(trichloromethyl)oxazolino-2'-deoxy-1-( $\beta$ -D-ribofuranosyl)uracil (44)**. Under nitrogen, 2,2'-anhydrouridine (13.1 g, 57.8 mmol), 4,4'-dimethoxytrityl chloride (20.6 g, 60.7 mmol) and DMAP (0.7 g, 5.8 mmol) were dissolved in a mixture of anhydrous pyridine (44 mL) and anhydrous DMF (35 mL) and the resulting mixture was stirred at rt for 16 h. The reaction mixture was concentrated under a vacuum and the residue was partitioned between DCM (75 mL) and water (75 mL). The organic phase was

separated and washed with saturated NaHCO<sub>3</sub> (2 x 60 mL) and brine (2 x 60 mL), dried with Na<sub>2</sub>SO<sub>4</sub> and concentrated to dryness under a vacuum and co-evaporated from toluene. Under nitrogen, the residue was dissolved in trichloroacetonitrile (40 mL) and triethylamine (1.1 mL, 7.5 mmol) was added. After refluxing the reaction solution at 95 °C for 18 h, the mixture was concentrated to a dark oil, which was dry loaded to a flash silica gel column. The product was purified by eluting with a gradient of 40 % to 60 % ethyl acetate in hexane containing 0.2 % triethylamine to afford **44** (16.3 g, 42 %) as pale-yellow solid. <sup>1</sup>H NMR (400 MHz, (CD<sub>3</sub>)<sub>2</sub>SO) δ 11.42 (s, 1H), 7.83 (d, *J* = 8.0 Hz, 1H), 7.50 – 7.34 (m, 2H), 7.29 – 7.18 (m, 7H), 6.94 – 6.81 (m, 4H), 5.91 (d, *J* = 2.2 Hz, 1H), 5.63 (d, *J* = 8.0 Hz, 1H), 5.45 (dd, *J* = 8.4, 4.5 Hz, 1H), 5.29 (dd, *J* = 8.4, 2.2 Hz, 1H), 4.14 (app dt, *J* = 8.1, 4.1 Hz, 1H), 3.73 (s, 3H), 3.72 (s, 3H), 3.48 (dd, *J* = 10.2, 7.7 Hz, 1H), 3.19 (dd, *J* = 10.2, 3.8 Hz, 1H). <sup>13</sup>C{<sup>1</sup>H} NMR (101 MHz, (CD<sub>3</sub>)<sub>2</sub>SO) δ 163.2, 161.5, 158.1, 158.1, 150.2, 144.8, 143.6, 135.3, 135.3, 129.7 (2C), 129.6 (2C), 127.8 (2C), 127.6 (2C), 126.7, 113.2 (4C), 101.8, 93.3, 86.7, 86.2, 85.7, 76.5, 63.9, 55.1, 55.0, 54.9. HRMS (ESI): *m/z* [M+Na]<sup>+</sup> calcd for C<sub>32</sub>H<sub>28</sub><sup>35</sup>Cl<sub>3</sub>N<sub>3</sub>NaO<sub>7</sub><sup>+</sup> 694.0891, found 694.0888 (see figure S143 for isotopic pattern).

*2'-amino-5'-O-(4,4'-dimethoxytrityl)-2'-deoxyuridine (45)*. 6 M NaOH solution (30 mL, 180 mmol) was added dropwise to a solution of **44** (16.3 g, 24.2 mmol) in ethanol (60 mL), and the resulting mixture was refluxed at 100 °C for 16 h. The reaction solution was cooled to rt and evaporated to dryness under a vacuum. The residue was taken up in DCM (240 mL) and saturated ammonium chloride (150 mL). The organic phase was separated, and the aqueous phase was extracted with DCM (2 x 100 mL). The combined organic phases were dried with Na<sub>2</sub>SO<sub>4</sub> and evaporated to dryness under a vacuum. The crude material was purified by flash silica column chromatography eluting with 1-5 % MeOH in DCM containing 0.2 % triethylamine, affording the product **45** (12.6 g, 95 %) as white solid. <sup>1</sup>H NMR (400 MHz, MeOD) δ 7.81 (d, *J* = 8.1 Hz, 1H), 7.44 – 7.37 (m, 2H), 7.35 – 7.18 (m, 7H), 6.91 – 6.83 (m, 4H), 5.86 (d, *J* = 6.9 Hz, 1H), 5.32 (d, *J* = 8.1 Hz, 1H), 4.29 (dd, *J* = 5.5, 2.9 Hz, 1H), 4.11 (q, *J* = 3.1 Hz, 1H), 3.77 (s, 6H), 3.53 (dd, *J* = 6.9, 5.5 Hz, 1H), 3.46 – 3.34 (m, 2H). <sup>13</sup>C{<sup>1</sup>H} NMR (101 MHz, MeOD) δ 166.1, 160.3 (2C), 152.7, 146.0, 142.2, 136.8, 136.6, 131.4 (4C), 129.4 (2C), 128.9 (2C), 128.1, 114.2 (2C), 114.2 (2C), 102.8, 90.3, 88.3, 86.4, 72.7, 64.7, 59.8, 55.7 (2C). HRMS (ESI): *m/z* [M+Na]<sup>+</sup> calcd for C<sub>30</sub>H<sub>32</sub>N<sub>3</sub>O<sub>7</sub><sup>+</sup> 546.2235, found 546.2270.

*2'-amino-2'-deoxyuridine (33)*. **45** (500 mg, 0.9 mmol) was dissolved in DCM containing 3 % trichloroacetic acid (12 mL) and mercaptoethanol (65 μL, 0.9 mmol) was added. The mixture was stirred at rt for 1 h. The mixture was diluted with DCM (20 mL), neutralized with triethylamine and concentrated under a vacuum. The residue was partitioned between DCM (15 mL) and H<sub>2</sub>O (15 mL) and the separated aqueous phase was washed with DCM (2 x 5

mL). Evaporating the aqueous phase to dryness under a vacuum afforded **33** (183 mg, 82 %) as white solid.  $^1\text{H}$  NMR (400 MHz,  $\text{D}_2\text{O}$ )  $\delta$  7.89 (d,  $J = 8.2$  Hz, 1H), 6.22 (d,  $J = 6.6$  Hz, 1H), 5.94 (d,  $J = 8.1$  Hz, 1H), 4.58 (dd,  $J = 6.3, 3.4$  Hz, 1H), 4.29 (app q,  $J = 3.6$  Hz, 1H), 4.12 (t,  $J = 6.4$  Hz, 1H), 3.99 – 3.75 (m, 2H).  $^{13}\text{C}$  NMR (101 MHz,  $\text{D}_2\text{O}$ )  $\delta$  166.0, 151.7, 141.3, 102.7, 86.6, 86.5, 68.9, 60.7, 55.9. HRMS (ESI):  $m/z$   $[\text{M}+\text{Na}]^+$  calcd for  $\text{C}_9\text{H}_{14}\text{N}_3\text{O}_5^+$  244.0928, found 244.0934.

## 7. Appendix

### 6-bromo-deaza-ribose-purine (10)

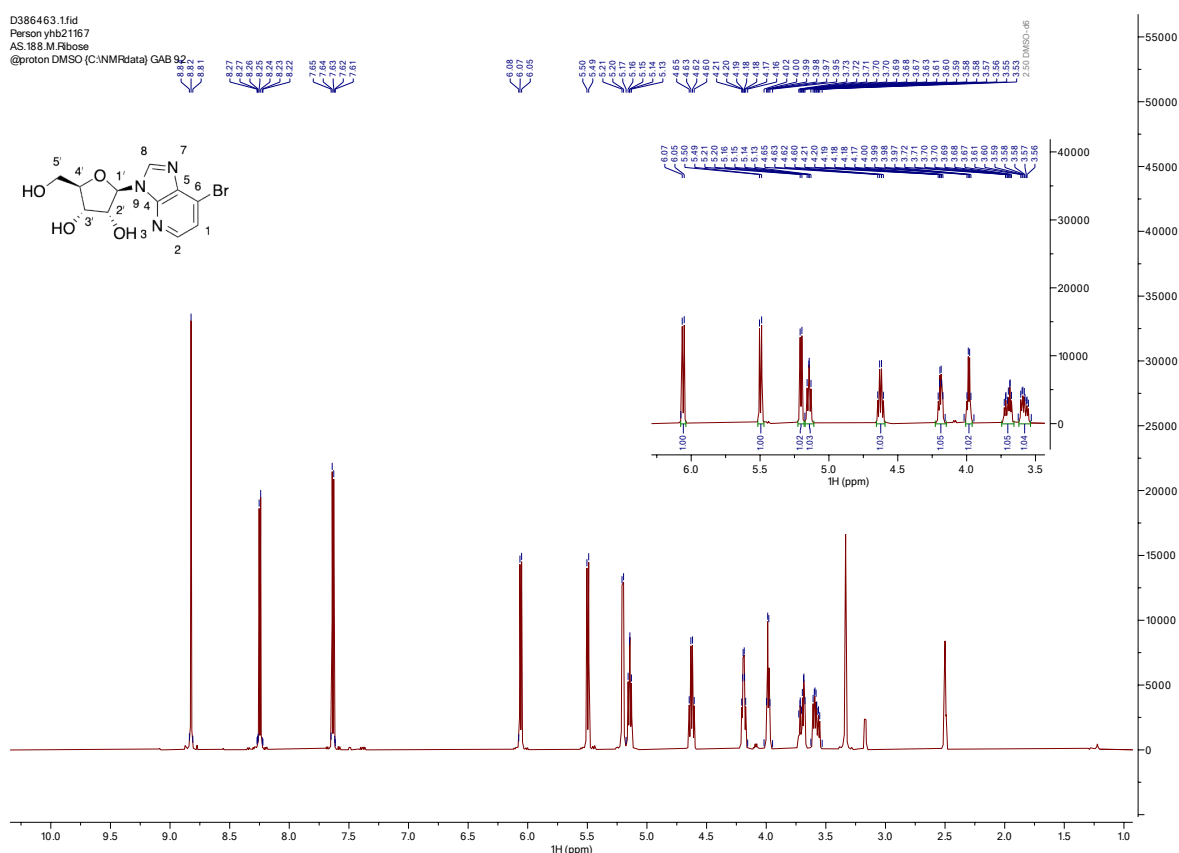

Figure S5 –  $^1\text{H}$  NMR of compound 10.

D386463.2.fid  
Person yhb21167  
AS:188.M.Ribose  
13C\_@DMSO (C:\NMR\data) GAB92

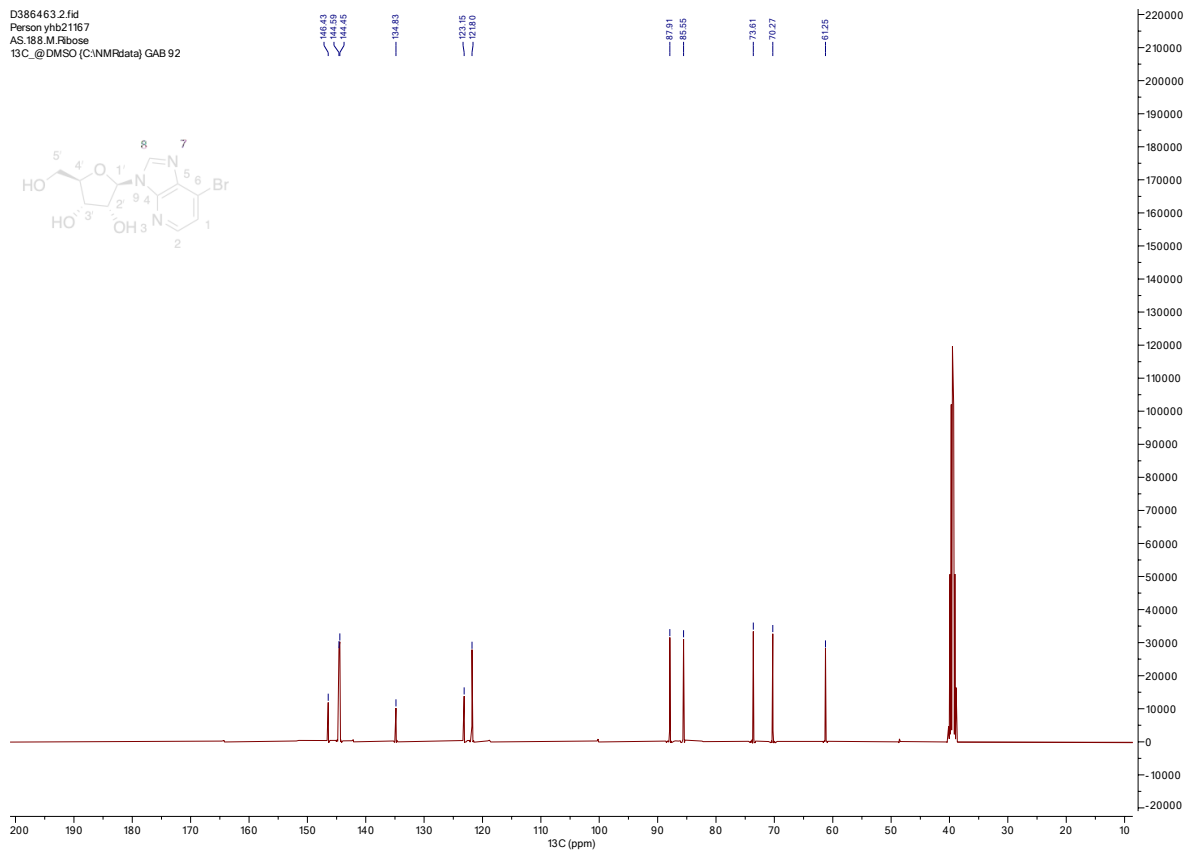

Figure S6 –  $^{13}\text{C}$  NMR of compound 10.

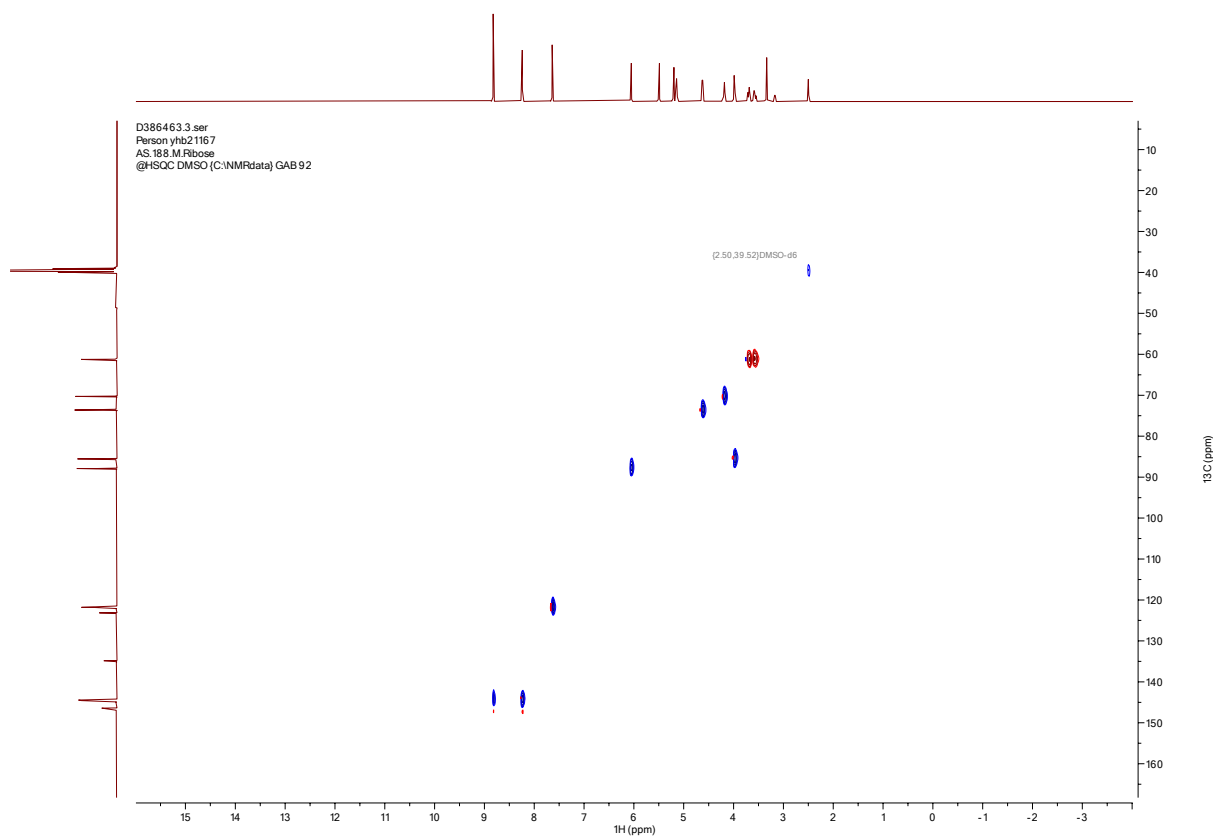

Figure S7- HSQC of compound 10.

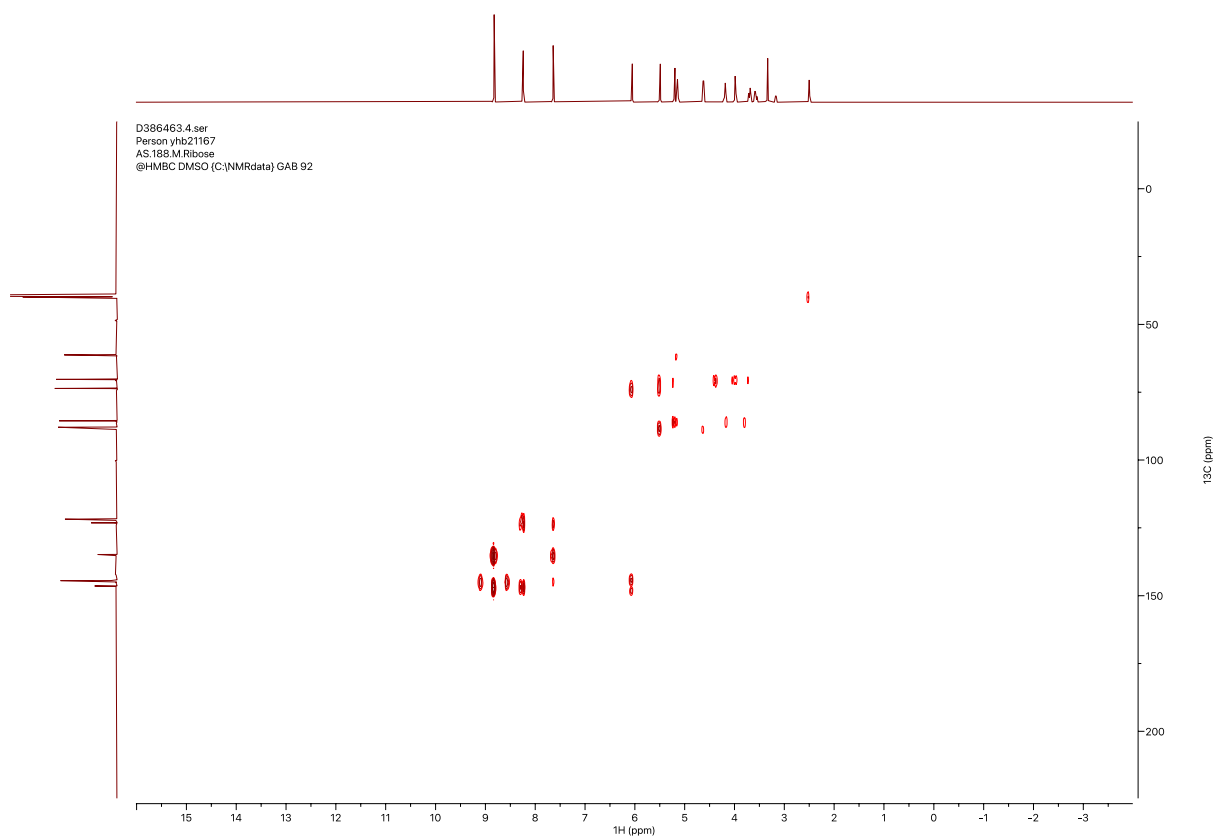

Figure S8 – HMBC of compound 10.

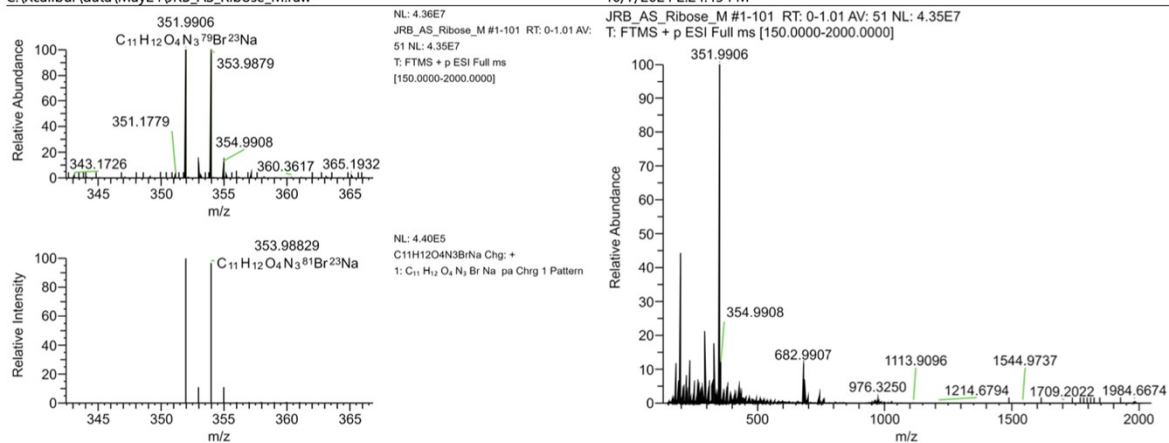

| Peak Mass | Display For...                                                                                  | S Fit                | RDB   | Delta [ppm] | Theo. mass | Rank | Combined S... | # Matched I... | # Missed Iso. | MS Cov. [%] | Pattern Cov... | MSMS Matc... |
|-----------|-------------------------------------------------------------------------------------------------|----------------------|-------|-------------|------------|------|---------------|----------------|---------------|-------------|----------------|--------------|
| 351.9906  | C <sub>11</sub> H <sub>12</sub> O <sub>4</sub> N <sub>3</sub> <sup>79</sup> Br <sup>23</sup> Na | 65.40660589<br>6759  | 6.50  | 0.81        | 351.99034  | 1    | 93.73         | 6              | 0             | 95.3        | 100            | (Collection) |
| 351.9906  | C <sub>9</sub> H <sub>7</sub> O <sub>2</sub> N <sub>9</sub> <sup>79</sup> Br                    | 46.39575579<br>84132 | 10.50 | 1.61        | 351.99006  | 2    | 92.2          | 5              | 0             | 94.74       | 99.65          | (Collection) |
| 351.9906  | C <sub>10</sub> H <sub>13</sub> O <sub>7</sub> N <sub>2</sub> <sup>79</sup> Br                  | 40.20305094<br>38763 | 5.00  | 1.59        | 351.99006  | 3    | 91.87         | 6              | 0             | 94.74       | 99.12          | (Collection) |
| 351.9906  | C <sub>9</sub> H <sub>10</sub> O <sub>3</sub> N <sub>6</sub> <sup>79</sup> Br <sup>23</sup> Na  | 32.36796449<br>34851 | 7.00  | 4.63        | 351.98900  | 4    | 91.46         | 5              | 0             | 94.74       | 99.56          | (Collection) |
| 351.9906  | C <sub>11</sub> H <sub>9</sub> O <sub>3</sub> N <sub>6</sub> <sup>79</sup> Br                   | 28.08150365<br>12167 | 10.00 | -2.20       | 351.99140  | 5    | 86.6          | 5              | 0             | 89.85       | 94.16          | (Collection) |
| 351.9906  | C <sub>12</sub> H <sub>8</sub> N <sub>7</sub> <sup>79</sup> Br <sup>23</sup> Na                 | 23.10644851<br>72512 | 11.50 | -2.99       | 351.99168  | 6    | 86.34         | 5              | 0             | 89.85       | 93.94          | (Collection) |
| 351.9906  | C <sub>13</sub> H <sub>14</sub> O <sub>5</sub> <sup>79</sup> Br <sup>23</sup> Na                | 17.17635158<br>36112 | 6.00  | -3.00       | 351.99168  | 7    | 86.03         | 6              | 0             | 89.85       | 93.05          | (Collection) |
| 351.9906  | C <sub>10</sub> H <sub>8</sub> O <sub>14</sub>                                                  | 28.30724041<br>90904 | 7.00  | -0.65       | 351.99086  | 8    | 46.69         | 2              | 2             | 47.71       | 96.88          | (Collection) |
| 351.9906  | C <sub>10</sub> HO <sub>4</sub> N <sub>8</sub> <sup>23</sup> Na                                 | 27.13897757<br>87979 | 14.00 | -1.42       | 351.99113  | 9    | 46.63         | 2              | 2             | 47.71       | 98.37          | (Collection) |
| 351.9906  | C <sub>11</sub> H <sub>7</sub> O <sub>11</sub> N <sup>23</sup> Na                               | 26.64168969<br>61059 | 8.50  | -1.43       | 351.99113  | 10   | 46.6          | 2              | 2             | 47.71       | 97.39          | (Collection) |

Figure S9 – HRMS of compound 10.



Sample Name : m  
 Sample ID :  
 Data Filename : runs\_23032024\_008.lcd  
 Method Filename : Admir Trans glyco Run.lcm  
 Batch Filename : runs.lcb  
 Vial # : 1-23  
 Injection Volume : 10 uL  
 Date Acquired : 23/03/2024 15:14:09  
 Date Processed : 23/03/2024 15:25:29

Sample Type : Unknown  
 Acquired by : Shimadzu  
 Processed by : Shimadzu

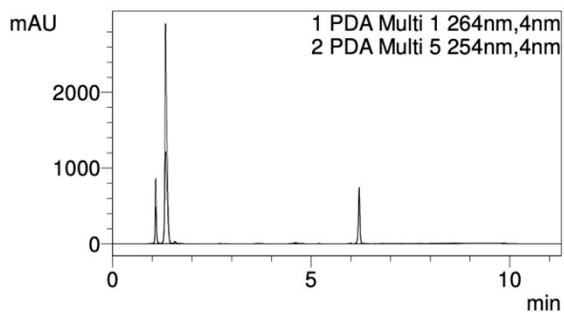

| Peak# | Ret. Time | Area     | Height  | ID# |
|-------|-----------|----------|---------|-----|
| 1     | 0.886     | 1540     | 699     |     |
| 2     | 0.958     | 3889     | 1333    |     |
| 3     | 1.088     | 1860021  | 813180  |     |
| 4     | 1.337     | 10447252 | 2822394 |     |
| 5     | 1.574     | 99030    | 27400   |     |
| 6     | 1.743     | 5743     | 793     |     |
| 7     | 1.968     | 2957     | 342     |     |
| 8     | 2.123     | 1645     | 253     |     |
| 9     | 2.721     | 3720     | 597     |     |
| 10    | 2.865     | 1067     | 196     |     |
| 11    | 3.737     | 20431    | 3503    |     |
| 12    | 4.613     | 76171    | 14509   |     |
| 13    | 4.790     | 6701     | 1496    |     |
| 14    | 5.206     | 2548     | 563     |     |
| 15    | 6.001     | 13726    | 3722    |     |
| 16    | 6.212     | 1706204  | 653866  |     |
| 17    | 6.589     | 1166     | 331     |     |
| 18    | 6.799     | 2741     | 771     |     |
| 19    | 7.036     | 2090     | 430     |     |
| 20    | 7.261     | 4380     | 1264    |     |
| 21    | 7.690     | 1726     | 644     |     |
| 22    | 7.768     | 1883     | 782     |     |

Figure S10 – HPLC trace of the reaction forming compound 10.

### 5-Iodouridine (18)

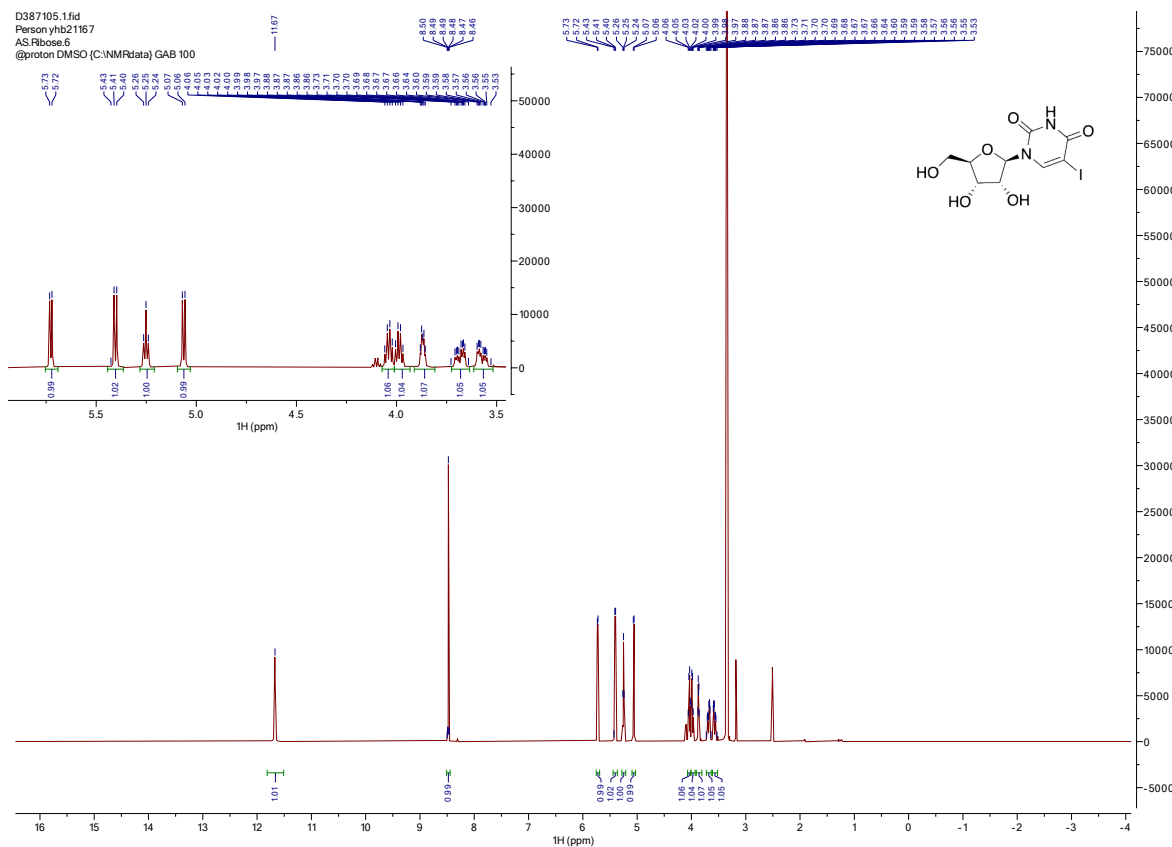

Figure S11 – <sup>1</sup>H NMR of compound 18

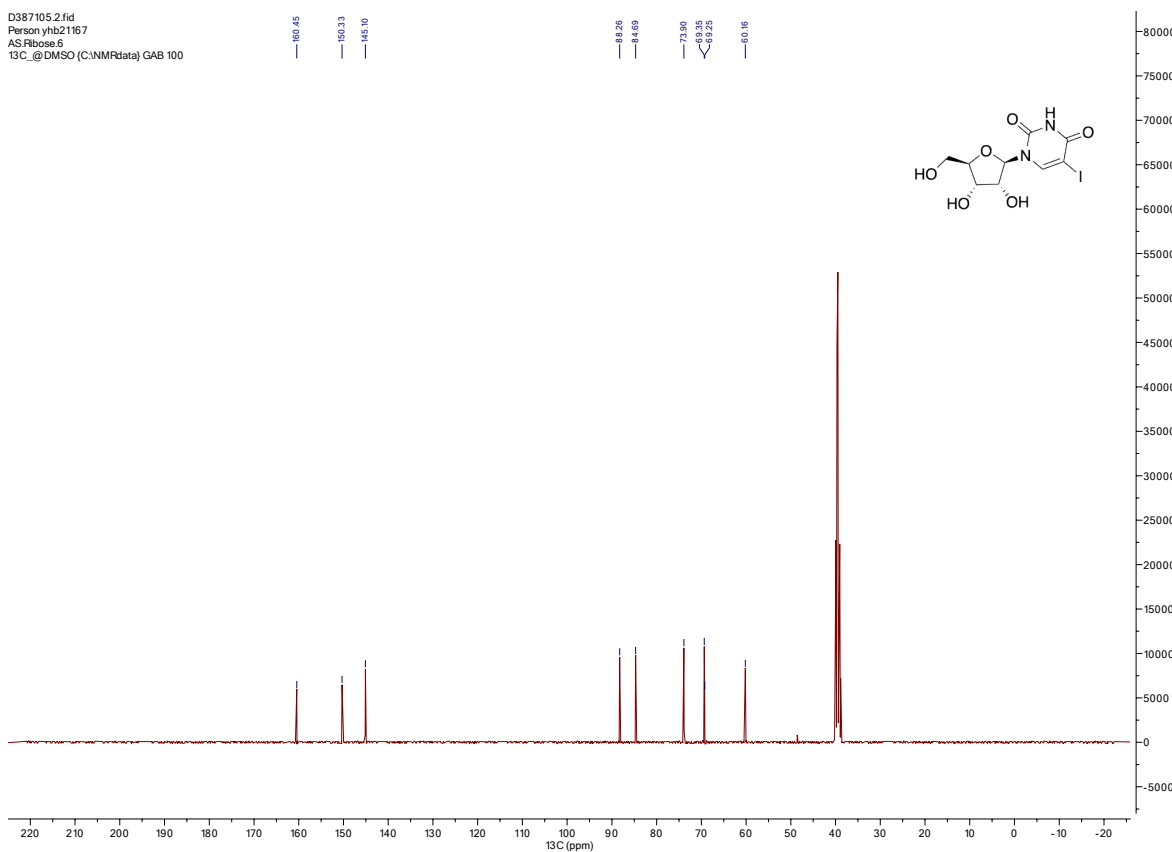

Figure S12 – <sup>13</sup>C NMR of compound 18

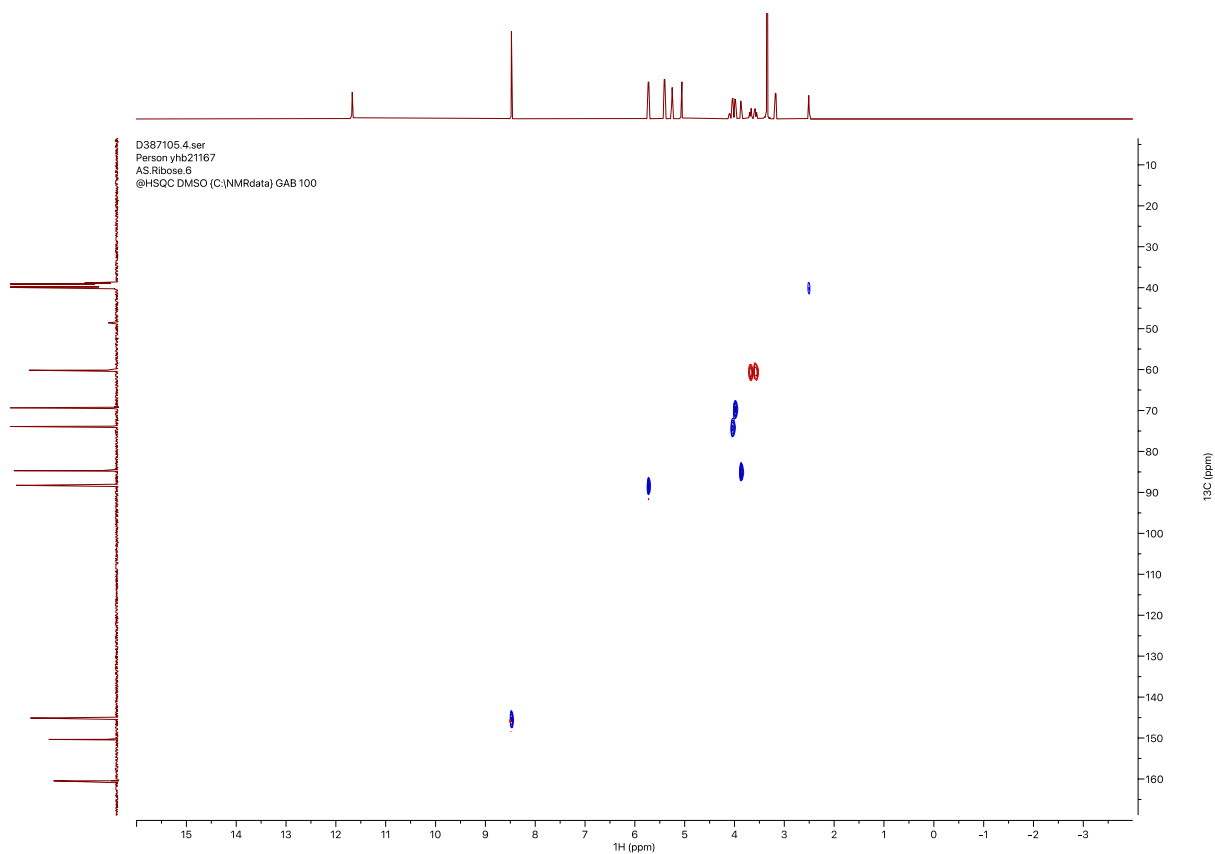

Figure S13 – HSQC of compound 18

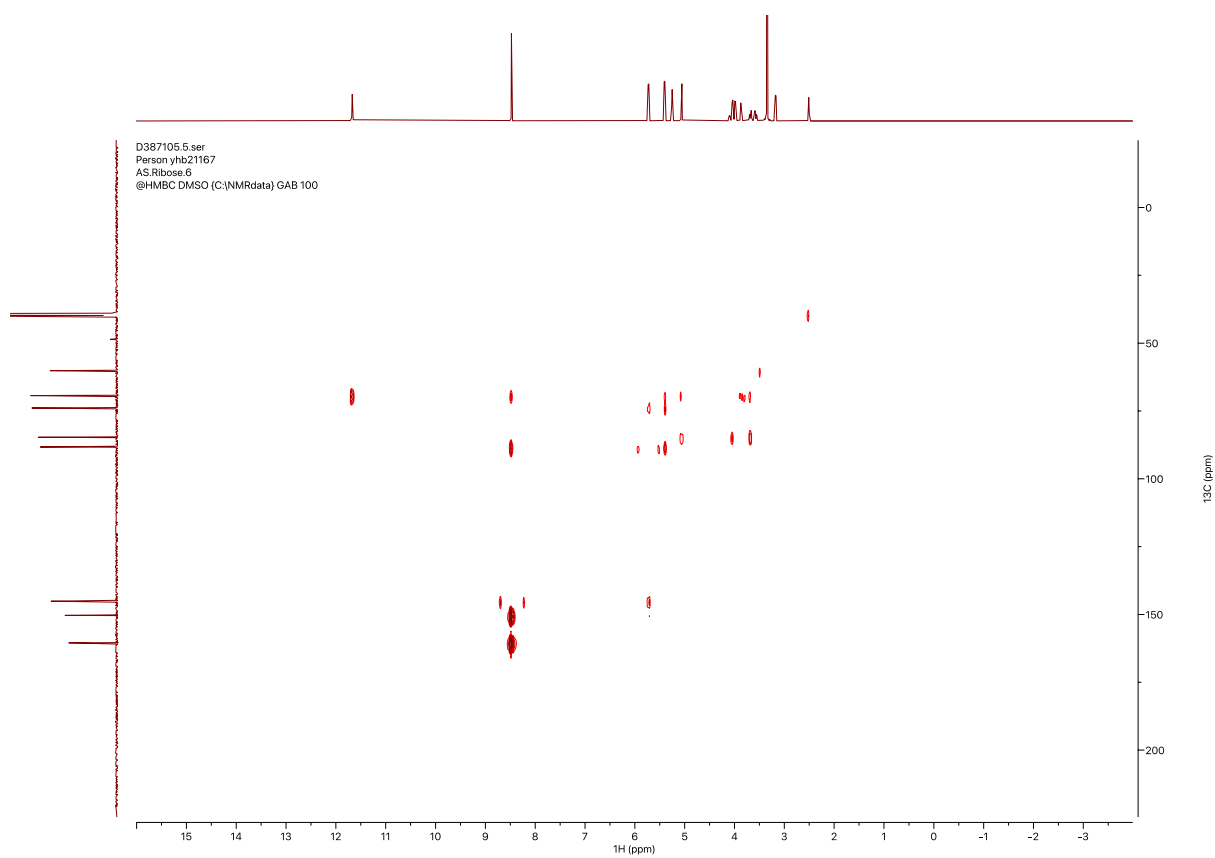

Figure S14 – HMBC of compound 18.

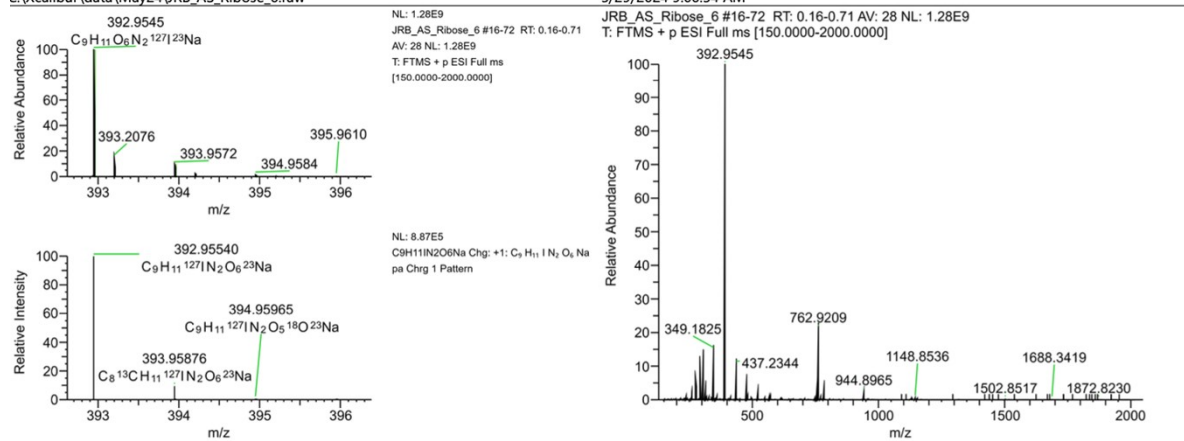

| Peak Mass | Display For...                                                                                            | S Fit                | RDB   | Delta [ppm] | Theo. mass | Rank | Combined S... | # Matched I... | # Missed Iso. | MS Cov. [%] | Pattern Cov... | MSMS Matc... |
|-----------|-----------------------------------------------------------------------------------------------------------|----------------------|-------|-------------|------------|------|---------------|----------------|---------------|-------------|----------------|--------------|
| 392.9545  | C <sub>9</sub> H <sub>11</sub> O <sub>6</sub> N <sub>2</sub> <sup>127I</sup> <sup>23</sup> Na             | 56.95248982<br>69364 | 5.00  | 1.25        | 392.95406  | 1    | 84.33         | 3              | 0             | 85.85       | 100            | (Collection) |
| 392.9545  | C <sub>9</sub> H <sub>11</sub> O <sub>6</sub> N <sub>2</sub> <sup>12</sup> <sup>7I</sup> <sup>23</sup> Na | 32.57684915<br>62261 | 4.50  | -2.17       | 392.95540  | 2    | 83.04         | 4              | 0             | 85.85       | 99.89          | (Collection) |
| 392.9545  | C <sub>8</sub> H <sub>10</sub> O <sub>6</sub> N <sub>2</sub> <sup>127I</sup> <sup>23</sup> Na             | 33.50052662<br>81784 | 10.00 | -2.16       | 392.95540  | 3    | 81.97         | 2              | 1             | 84.67       | 99.48          | (Collection) |
| 392.9545  | C <sub>9</sub> H <sub>10</sub> O <sub>6</sub> N <sub>2</sub> <sup>127I</sup>                              | 30.92001927<br>23284 | 8.50  | -1.46       | 392.95512  | 4    | 81.84         | 3              | 0             | 84.67       | 98.99          | (Collection) |
| 392.9545  | C <sub>8</sub> O <sub>11</sub> N <sub>2</sub> <sup>23</sup> Na                                            | 27.52221709<br>73524 | 12.00 | -0.64       | 392.95480  | 5    | 81.66         | 4              | 0             | 84.67       | 97.48          | (Collection) |
| 392.9545  | C <sub>7</sub> HO <sub>14</sub> N <sub>6</sub>                                                            | 25.36598803<br>12483 | 10.50 | 0.06        | 392.95453  | 6    | 81.55         | 4              | 0             | 84.67       | 96.96          | (Collection) |
| 392.9545  | C <sub>8</sub> H <sub>12</sub> O <sub>6</sub> N <sup>127I</sup>                                           | 23.98564277<br>96847 | 3.00  | -1.47       | 392.95513  | 7    | 81.47         | 4              | 0             | 84.67       | 97.95          | (Collection) |
| 392.9545  | C <sub>7</sub> H <sub>10</sub> O <sub>13</sub> N <sub>2</sub> <sup>23</sup> Na                            | 22.66083155<br>42822 | 7.00  | 2.76        | 392.95346  | 8    | 81.4          | 4              | 0             | 84.67       | 96.8           | (Collection) |
| 392.9545  | C <sub>8</sub> H <sub>10</sub> O <sub>8</sub> N <sub>4</sub> <sup>12</sup> <sup>7I</sup>                  | 40.67654906<br>00966 | 3.50  | 1.94        | 392.95378  | 9    | 76.33         | 4              | 0             | 78.31       | 93.55          | (Collection) |
| 392.9545  | C <sub>6</sub> H <sub>12</sub> O <sub>6</sub> N <sup>127I</sup> <sup>23</sup> Na                          | 20.62284248<br>29234 | 0.00  | 4.65        | 392.95272  | 10   | 74.16         | 4              | 0             | 77.13       | 91.79          | (Collection) |

Figure S15 – HRMS of compound 18.

Sample Name : 6  
 Sample ID :  
 Data Filename : runs\_25032024\_004.lcd  
 Method Filename : Admir Trans glyco Run.lcm  
 Batch Filename : runs.lcb  
 Vial # : 1-64  
 Injection Volume : 10 uL  
 Date Acquired : 25/03/2024 11:34:50  
 Date Processed : 25/03/2024 11:46:10

Sample Type : Unknown  
 Acquired by : Shimadzu  
 Processed by : Shimadzu

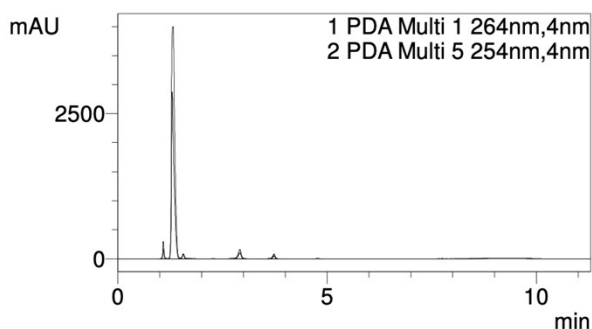

| PDA Ch1 264nm |           |          |         |     |
|---------------|-----------|----------|---------|-----|
| Peak#         | Ret. Time | Area     | Height  | ID# |
| 1             | 1.088     | 612858   | 280490  |     |
| 2             | 1.318     | 21658448 | 3998808 |     |
| 3             | 1.566     | 311402   | 83491   |     |
| 4             | 2.289     | 8779     | 1028    |     |
| 5             | 2.916     | 834052   | 158728  |     |
| 6             | 3.446     | 1876     | 416     |     |
| 7             | 3.735     | 329018   | 78599   |     |
| 8             | 4.781     | 10821    | 2591    |     |
| 9             | 7.671     | 1810     | 660     |     |
| 10            | 7.749     | 4459     | 2358    |     |
| 11            | 8.133     | 1493     | 497     |     |
| 12            | 8.245     | 1569     | 383     |     |
| 13            | 8.409     | 3039     | 1211    |     |
| 14            | 8.643     | 3148     | 385     |     |
| 15            | 8.760     | 1065     | 162     |     |
| 16            | 9.840     | 4670     | 1546    |     |
| Total         |           | 23788507 | 4611352 |     |

Figure S16 – HPLC trace of the reaction forming compound 18.

# 8-bromo-deaza-ribose-purine (16)

D386831.1.fid  
Person yhb:21167  
AS:Ribose 8BrPurine  
@proton DMSO (C:\NMR\data) GAB 103

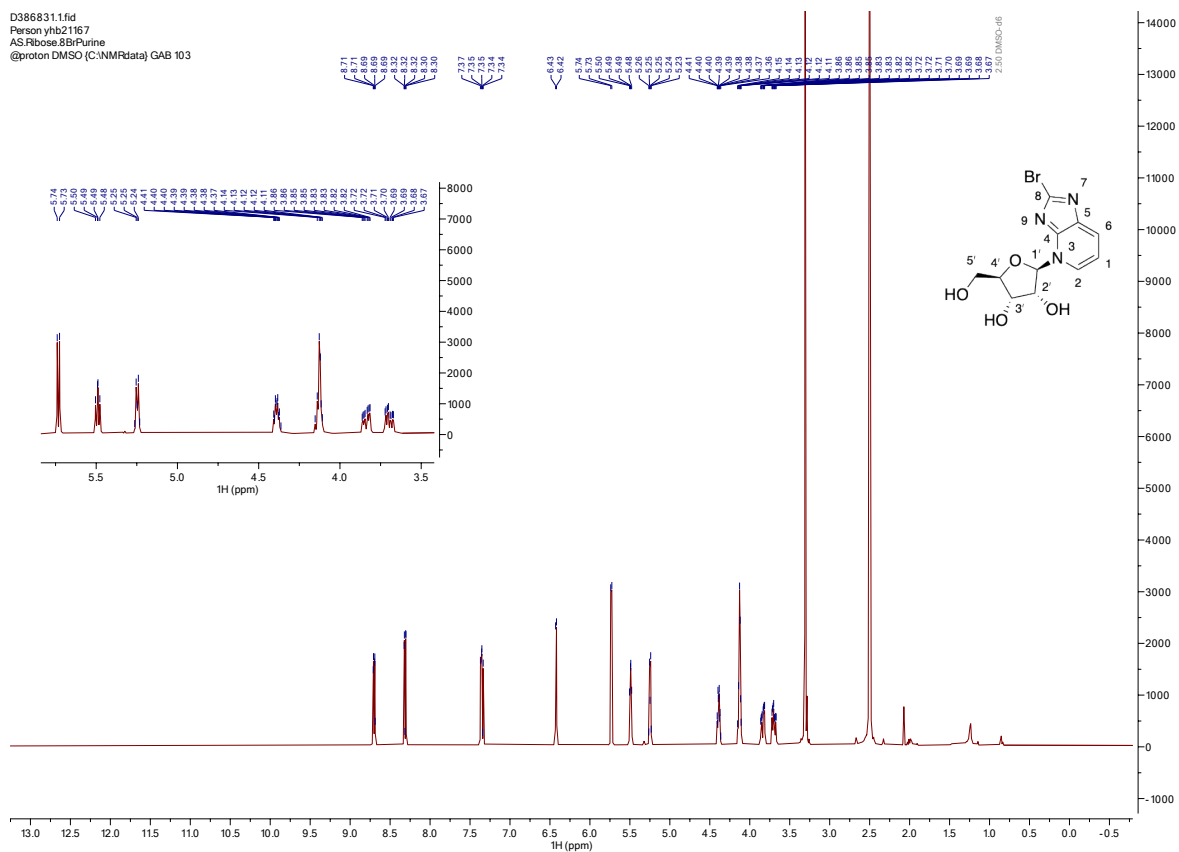

Figure S17 – <sup>1</sup>H NMR of compound 16

D3868312.fid  
Person yhb21167  
AS:Ribose.3BrPurine  
13C\_@DMSO (C:\NMR\data) GAB 103

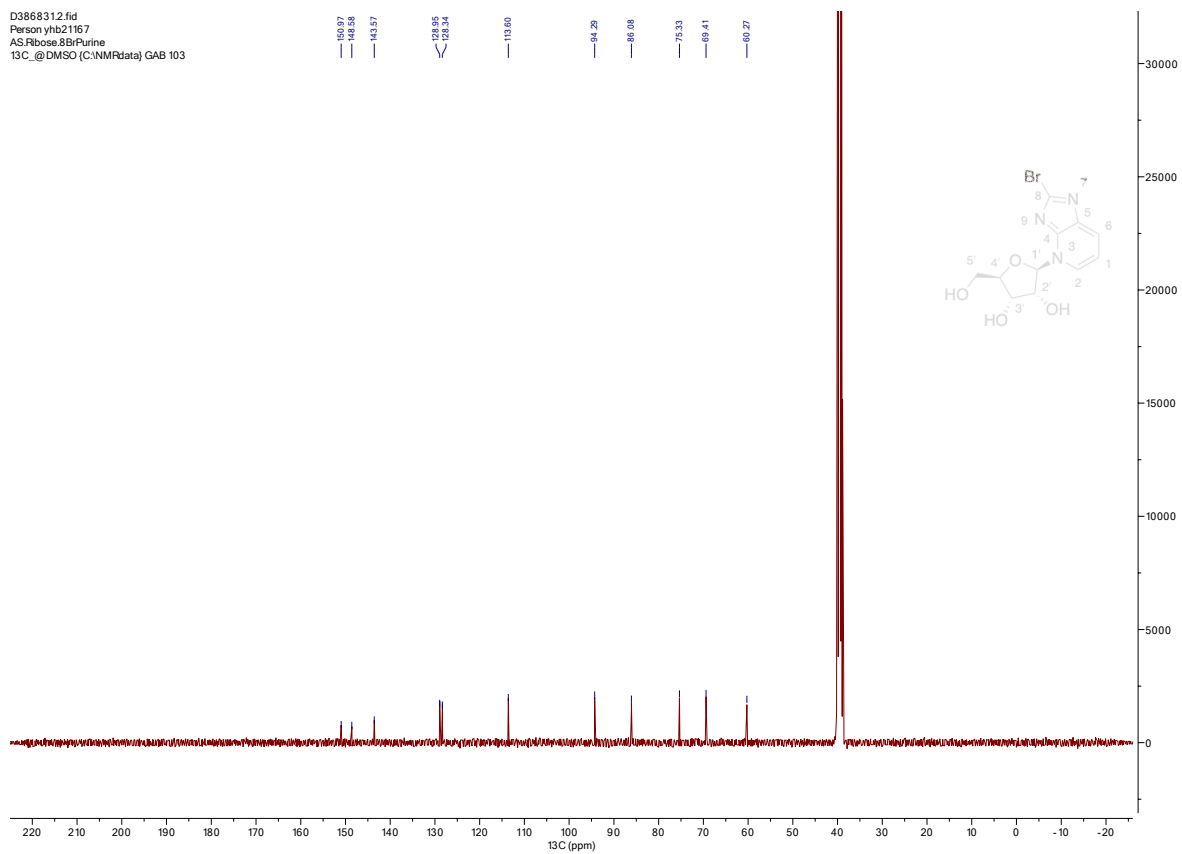

Figure S18 –  $^{13}\text{C}$  NMR of compound 16.

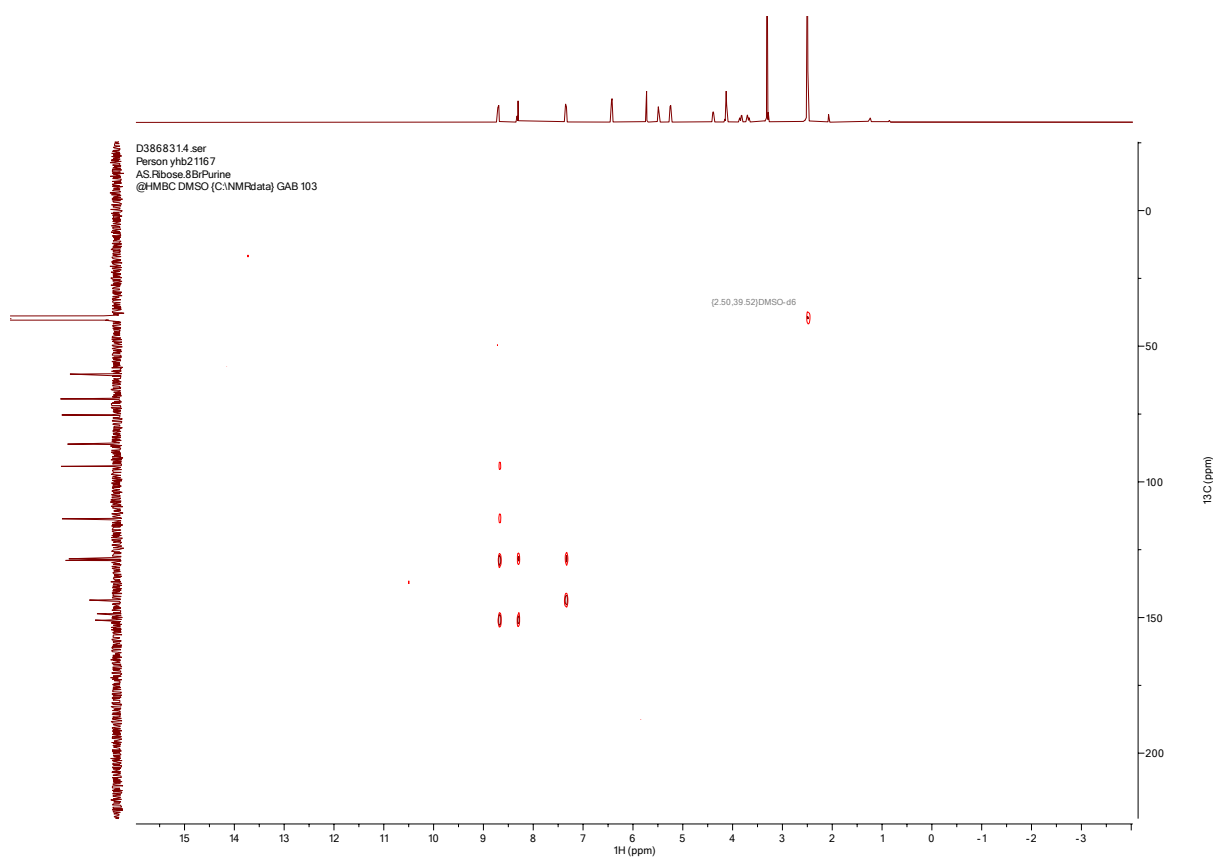

Figure S19 – HMBC of compound 16.

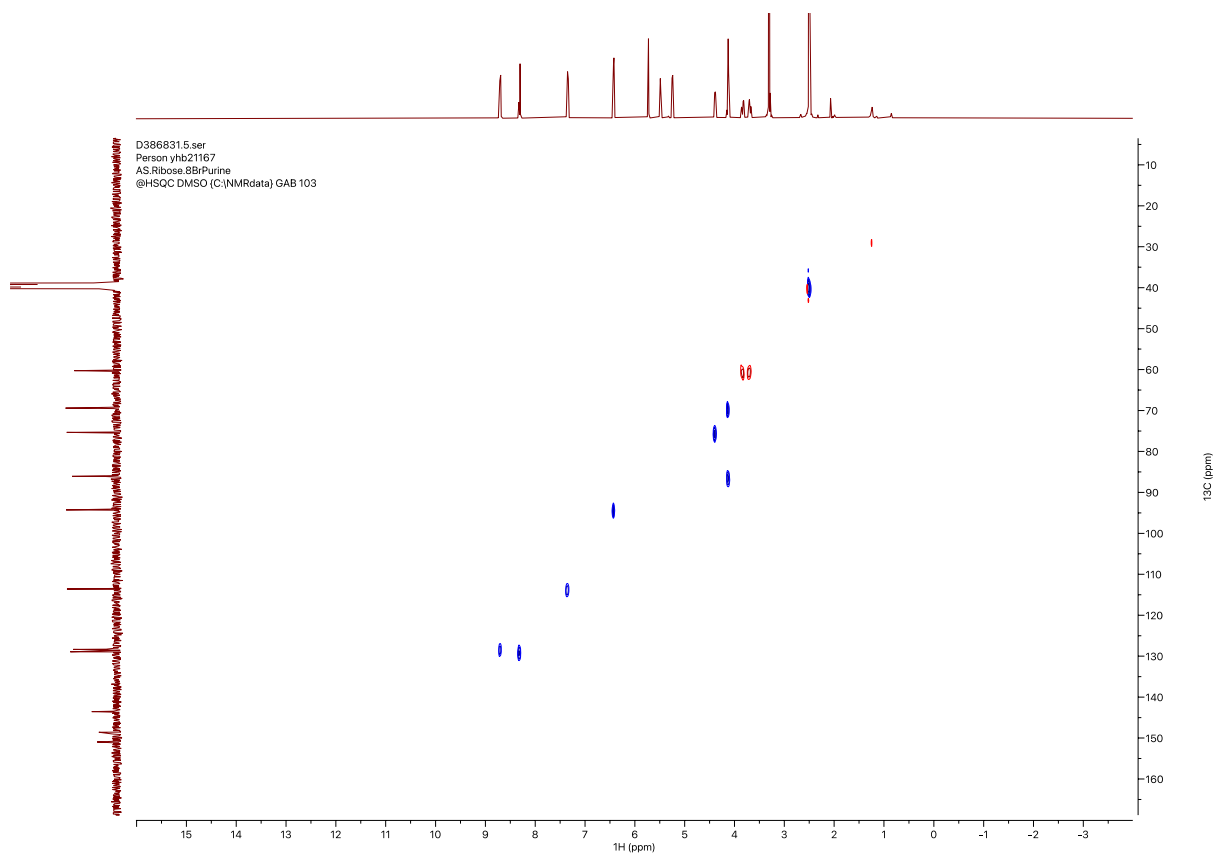

Figure S20 – HSQC of compound 16.

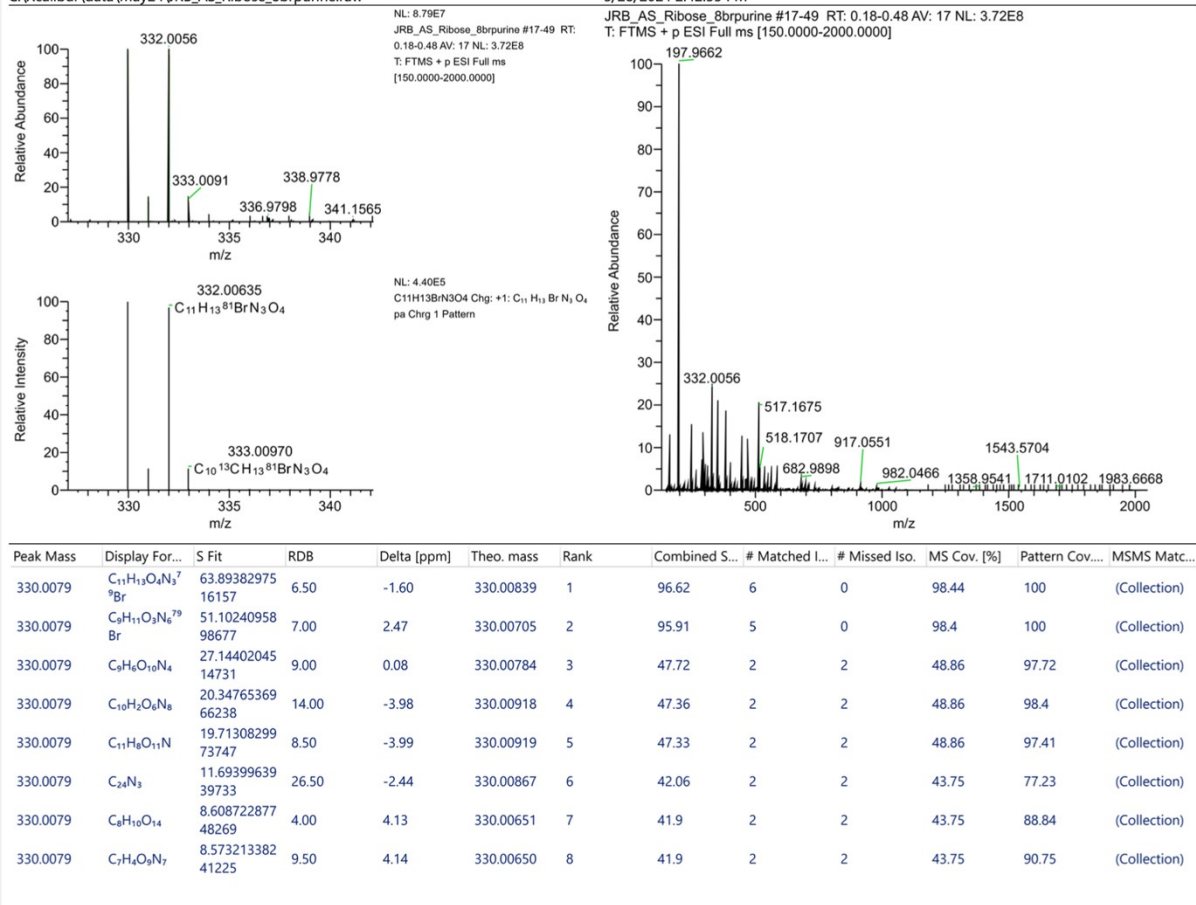

Figure S21 – HRMS of compound 16.



Sample Name : 8brp  
 Sample ID :  
 Data Filename : runs\_23032024\_023.lcd  
 Method Filename : Admir Trans glyco Run.lcm  
 Batch Filename : runs.lcb  
 Vial # : 1-38  
 Injection Volume : 10 uL  
 Date Acquired : 23/03/2024 18:10:57  
 Date Processed : 23/03/2024 18:22:18

Sample Type : Unknown  
 Acquired by : Shimadzu  
 Processed by : Shimadzu

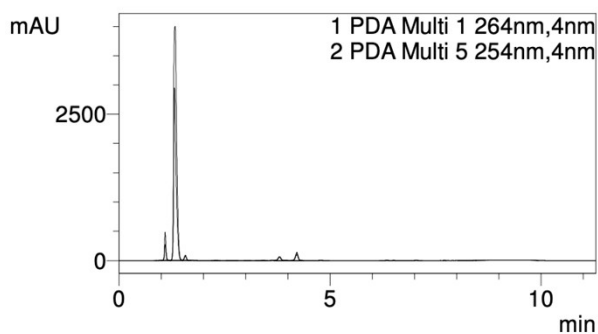

| PDA Ch1 264nm |           |          |         |     |
|---------------|-----------|----------|---------|-----|
| Peak#         | Ret. Time | Area     | Height  | ID# |
| 1             | 0.884     | 1843     | 789     |     |
| 2             | 1.094     | 1161869  | 473040  |     |
| 3             | 1.329     | 20355138 | 3992654 |     |
| 4             | 1.574     | 369584   | 89252   |     |
| 5             | 2.297     | 3750     | 606     |     |
| 6             | 2.735     | 3155     | 377     |     |
| 7             | 3.044     | 1365     | 236     |     |
| 8             | 3.437     | 4317     | 555     |     |
| 9             | 3.805     | 352406   | 67800   |     |
| 10            | 4.216     | 618169   | 135266  |     |
| 11            | 4.787     | 12696    | 2314    |     |
| 12            | 6.209     | 1081     | 366     |     |
| 13            | 6.352     | 15636    | 5582    |     |
| 14            | 6.512     | 5028     | 1738    |     |
| 15            | 6.712     | 1343     | 315     |     |
| 16            | 6.772     | 1287     | 380     |     |
| 17            | 7.039     | 12350    | 3912    |     |
| 18            | 7.708     | 3929     | 1948    |     |
| 19            | 8.138     | 1331     | 343     |     |
| 20            | 8.252     | 1502     | 306     |     |
| 21            | 8.414     | 2789     | 1272    |     |
| 22            | 8.645     | 3010     | 346     |     |
| 23            | 9.845     | 3502     | 1147    |     |
| Total         |           | 22937081 | 4780543 |     |

Figure S22 – HPLC trace of the reaction forming compound 16.

## 6-chloro-deaza-riboseyl-purine (11)

D386758.1.fid  
Person yhb21167  
A.Ribose-B  
@proton DMSO (C:\NMR\data) GAB 104

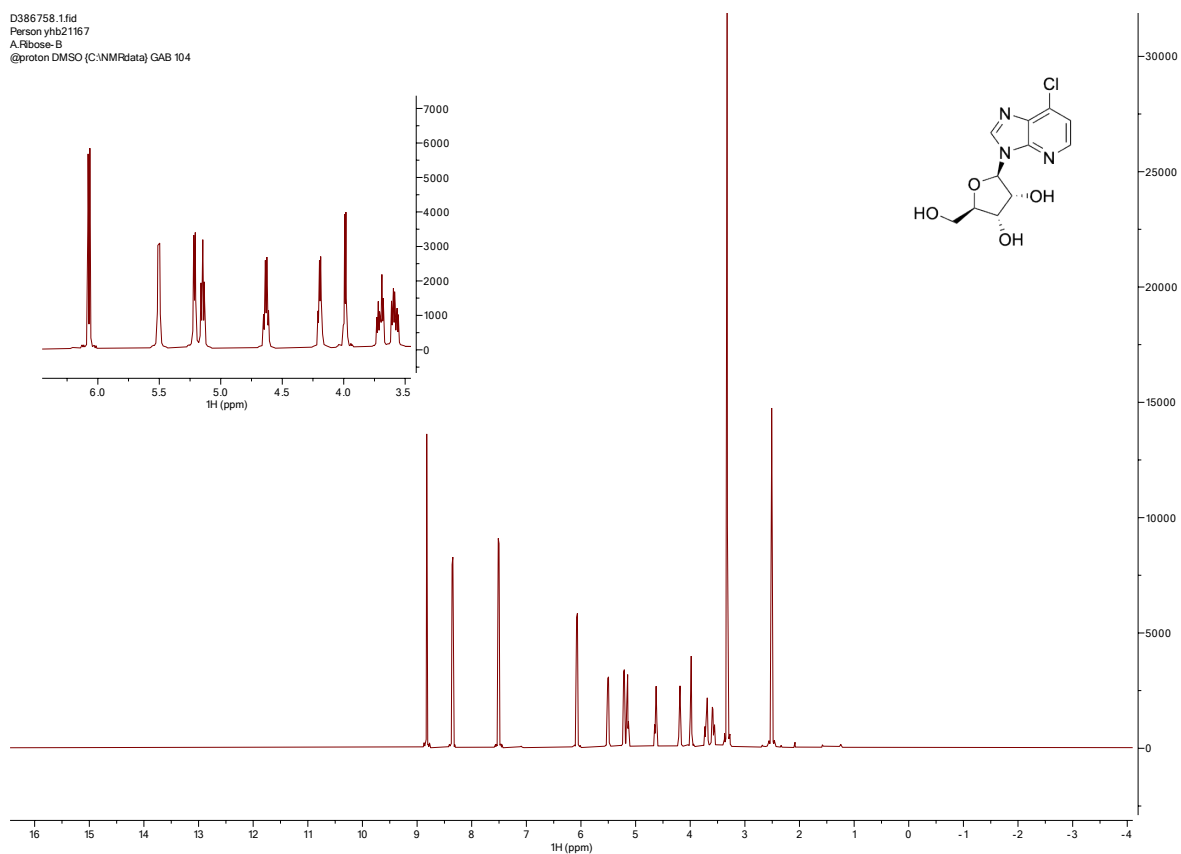

Figure S23 –  $^1\text{H}$  NMR of compound 11.

D386758.2.fid  
Person yhb21167  
A.Ribose-B  
 $^{13}\text{C}$  @DMSO (C:\NMR\data) GAB 104

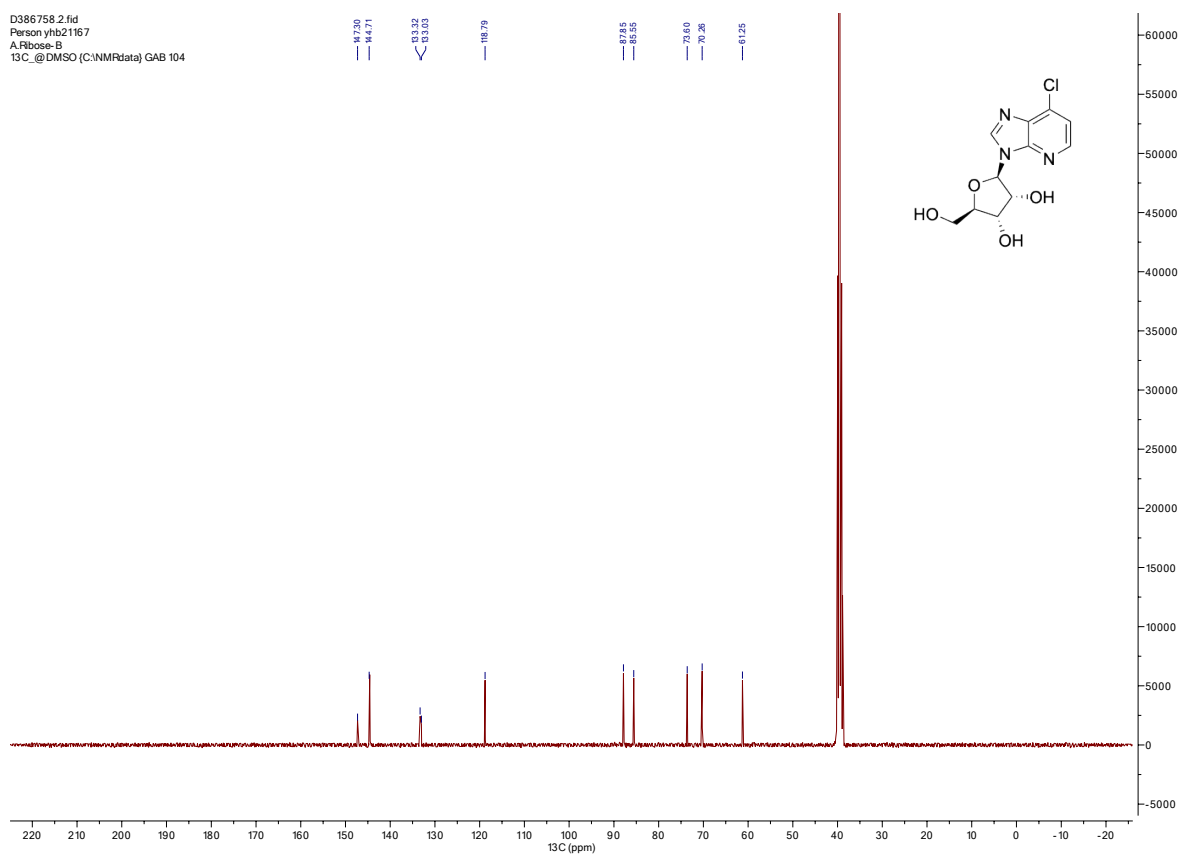

Figure S24 –  $^{13}\text{C}$  NMR of compound 11.

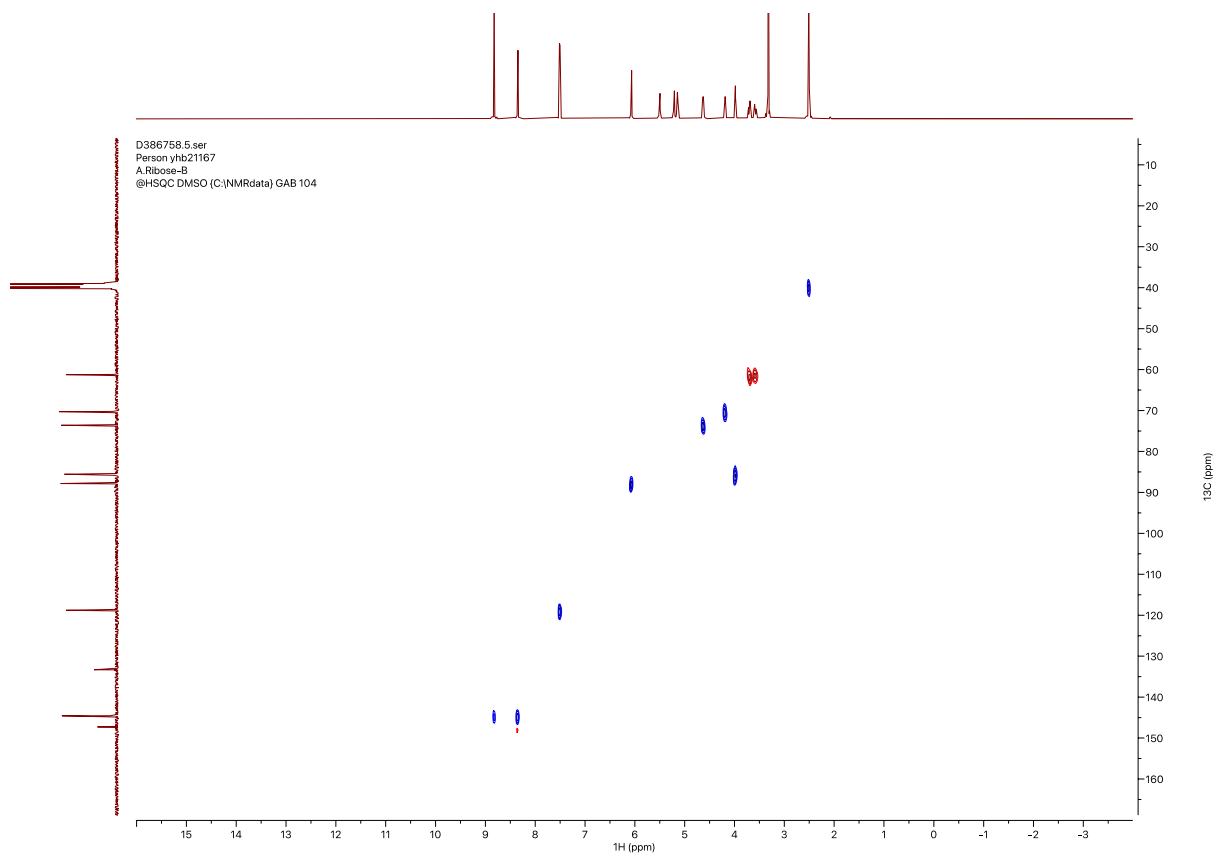

Figure S25 – HSQC of compound 11.

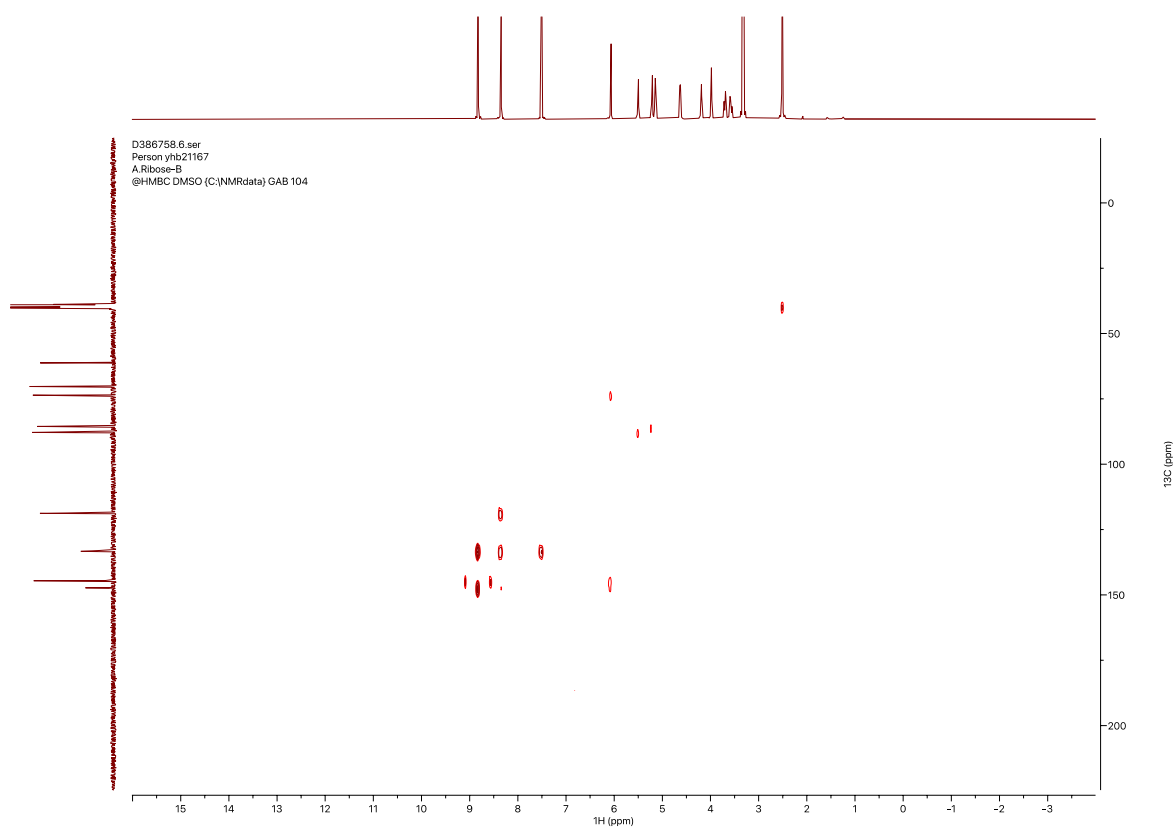

Figure S26 – HMBC of compound 11.

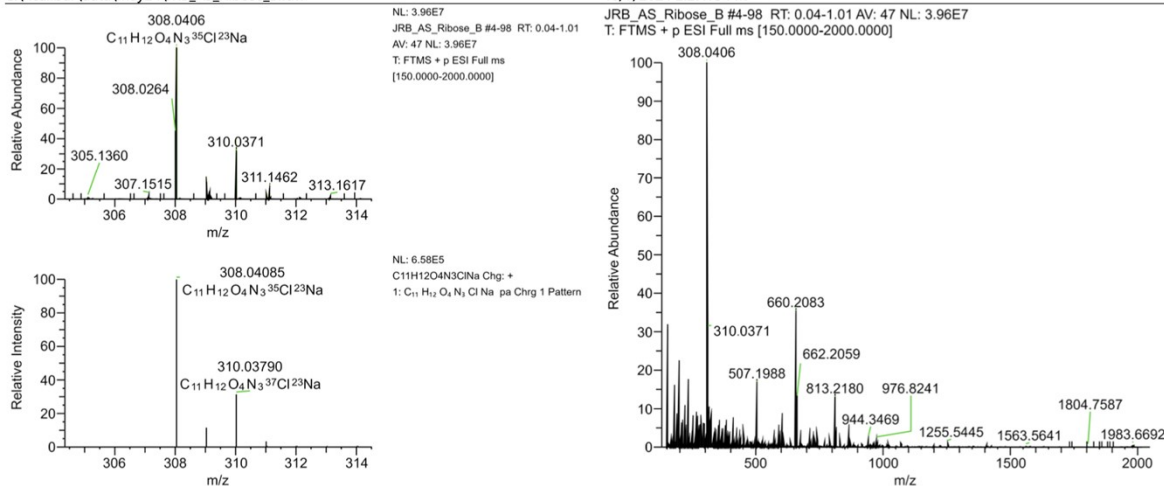

| Peak Mass | Display For...                                                                                  | S Fit                | RDB   | Delta [ppm] | Theo. mass | Rank | Combined S... | # Matched I... | # Missed Iso. | MS Cov. [%] | Pattern Cov... | MSMS Matc... |
|-----------|-------------------------------------------------------------------------------------------------|----------------------|-------|-------------|------------|------|---------------|----------------|---------------|-------------|----------------|--------------|
| 308.0406  | C <sub>11</sub> H <sub>12</sub> O <sub>4</sub> N <sub>3</sub> <sup>35</sup> Cl <sup>23</sup> Na | 49.57631077<br>55324 | 6.50  | -0.78       | 308.04085  | 1    | 85.37         | 5              | 1             | 87.36       | 99.15          | (Collection) |
| 308.0406  | C <sub>9</sub> H <sub>10</sub> O <sub>3</sub> N <sub>6</sub> <sup>35</sup> Cl <sup>23</sup> Na  | 48.58862979<br>50758 | 7.00  | 3.58        | 308.03951  | 2    | 85.32         | 5              | 0             | 87.36       | 100            | (Collection) |
| 308.0406  | C <sub>10</sub> H <sub>13</sub> O <sub>7</sub> N <sub>2</sub> <sup>35</sup> Cl                  | 52.00800205<br>12075 | 5.00  | 0.11        | 308.04058  | 3    | 85.3          | 5              | 0             | 87.15       | 99.62          | (Collection) |
| 308.0406  | C <sub>9</sub> H <sub>7</sub> O <sub>2</sub> N <sub>9</sub> <sup>35</sup> Cl                    | 29.40179697<br>33165 | 10.50 | 0.13        | 308.04057  | 4    | 84.11         | 5              | 2             | 87.15       | 96.81          | (Collection) |
| 308.0406  | C <sub>12</sub> H <sub>4</sub> O <sub>3</sub> N <sub>8</sub>                                    | 37.67652885<br>79056 | 15.00 | 1.71        | 308.04009  | 5    | 64.53         | 2              | 1             | 66.03       | 98.95          | (Collection) |
| 308.0406  | C <sub>13</sub> H <sub>3</sub> N <sub>9</sub> <sup>23</sup> Na                                  | 25.83758709<br>0504  | 16.50 | 0.82        | 308.04036  | 6    | 63.91         | 2              | 2             | 66.03       | 98.79          | (Collection) |
| 308.0406  | C <sub>13</sub> H <sub>10</sub> O <sub>8</sub> N                                                | 24.23615471<br>45013 | 9.50  | 1.69        | 308.04009  | 7    | 63.83         | 2              | 2             | 66.03       | 97.89          | (Collection) |
| 308.0406  | C <sub>11</sub> H <sub>9</sub> O <sub>3</sub> N <sub>6</sub> <sup>35</sup> Cl                   | 10.18693864<br>03185 | 10.00 | -4.23       | 308.04192  | 8    | 63.09         | 5              | 1             | 66.03       | 75             | (Collection) |

Figure S27 – HRMS of compound 11.

Sample Name : b  
 Sample ID :  
 Data Filename : base b\_19032024\_003.lcd  
 Method Filename : Admir\_Trans glyco\_Run.lcm  
 Batch Filename : base b.lcb  
 Vial # : 1-93  
 Injection Volume : 10 uL  
 Date Acquired : 19/03/2024 22:38:19  
 Date Processed : 19/03/2024 22:49:41

Sample Type : Unknown  
 Acquired by : Shimadzu  
 Processed by : Shimadzu

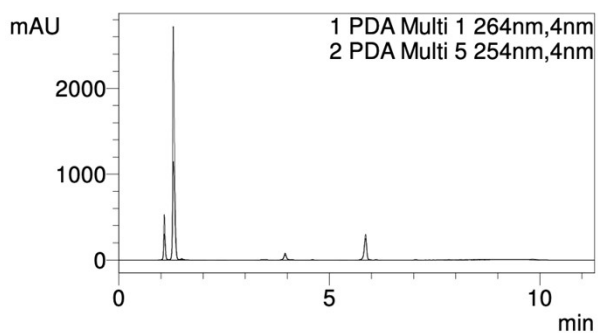

| Peak# | Ret. Time | Area     | Height  | ID# |
|-------|-----------|----------|---------|-----|
| 1     | 1.081     | 1296572  | 509525  |     |
| 2     | 1.295     | 8058066  | 2672410 |     |
| 3     | 1.494     | 36347    | 14405   |     |
| 4     | 2.481     | 2129     | 354     |     |
| 5     | 3.498     | 15777    | 2834    |     |
| 6     | 3.951     | 350694   | 78320   |     |
| 7     | 4.603     | 4343     | 1081    |     |
| 8     | 5.330     | 1154     | 248     |     |
| 9     | 5.862     | 1005059  | 248505  |     |
| 10    | 6.113     | 4488     | 1011    |     |
| 11    | 7.048     | 7877     | 3149    |     |
| 12    | 7.834     | 4325     | 1235    |     |
| 13    | 8.113     | 2633     | 696     |     |
| 14    | 8.238     | 1230     | 393     |     |
| 15    | 8.411     | 1197     | 436     |     |
| 16    | 8.480     | 1860     | 267     |     |
| 17    | 8.645     | 1791     | 344     |     |
| 18    | 8.768     | 1126     | 227     |     |
| 19    | 9.854     | 5851     | 1727    |     |
| Total |           | 10802517 | 3537168 |     |

Figure S28 – HPLC trace of the reaction forming compound 11.

### 6-dimethylamino-adenosine (14)



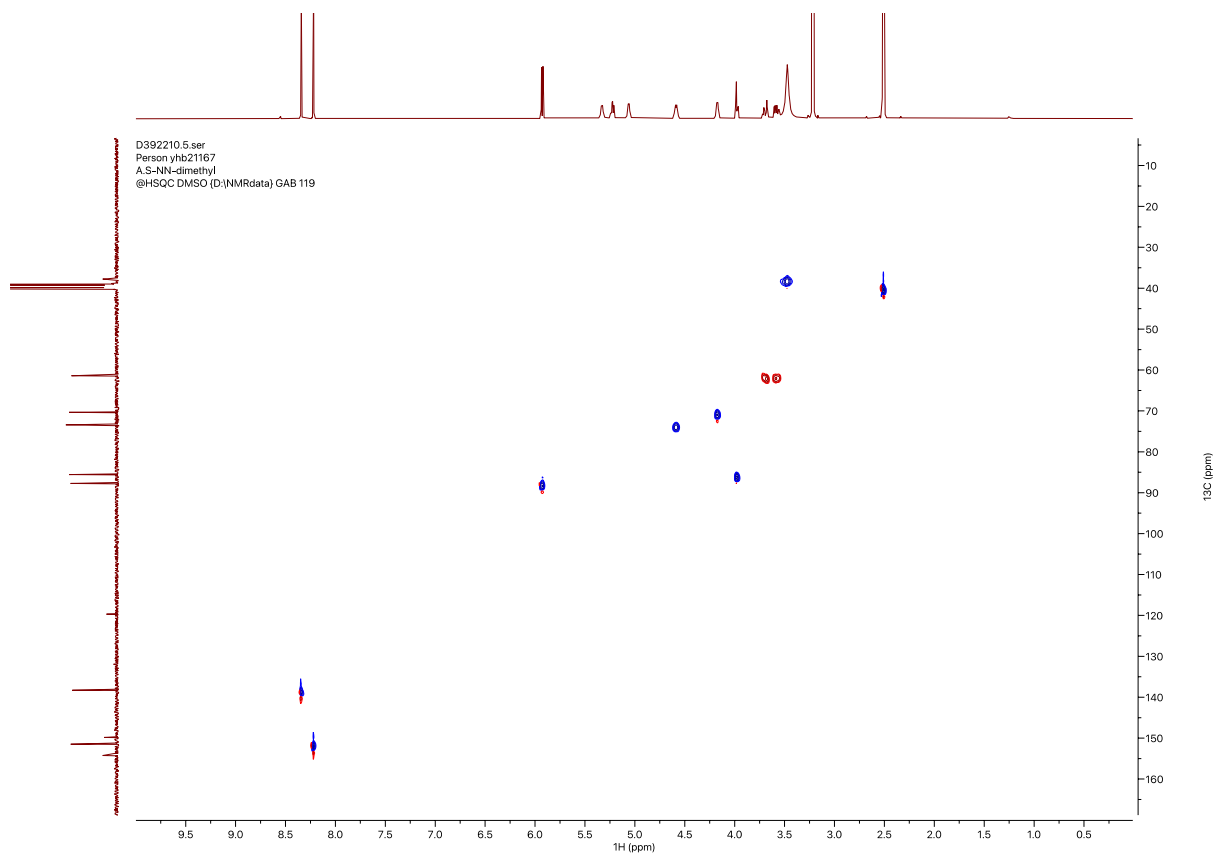

Figure S31 – HSQC of compound 14.

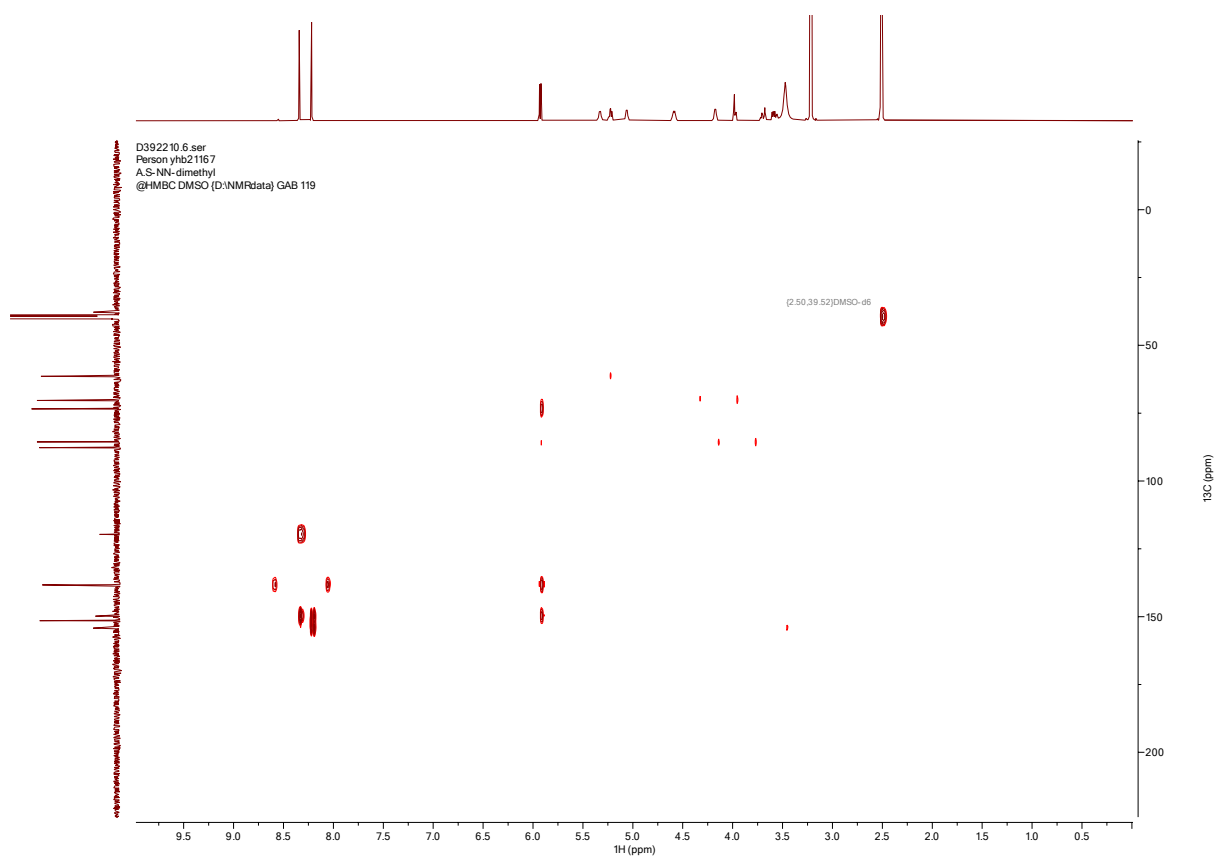

Figure S32 – HMBC of compound 14.

Sample Name : 6-nndimethyl-purine  
 Sample ID :  
 Data Filename : runs\_21032024\_015.lcd  
 Method Filename : Admir Trans glyco Run.lcm  
 Batch Filename : runs.lcb  
 Vial # : 1-75  
 Injection Volume : 10 uL  
 Date Acquired : 21/03/2024 21:05:00  
 Date Processed : 21/03/2024 21:16:20

Sample Type : Unknown  
 Acquired by : Shimadzu  
 Processed by : Shimadzu

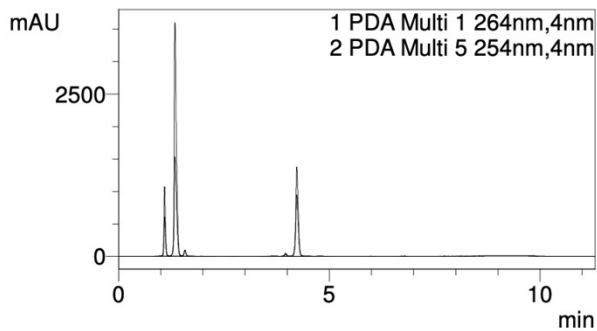

| PDA Ch1 264nm |           |          |         |     |
|---------------|-----------|----------|---------|-----|
| Peak#         | Ret. Time | Area     | Height  | ID# |
| 1             | 0.886     | 3013     | 1466    |     |
| 2             | 0.958     | 6967     | 2526    |     |
| 3             | 1.094     | 2629559  | 1061047 |     |
| 4             | 1.340     | 12924562 | 3577178 |     |
| 5             | 1.577     | 321610   | 96373   |     |
| 6             | 1.748     | 7232     | 1125    |     |
| 7             | 1.976     | 4305     | 543     |     |
| 8             | 2.129     | 1247     | 185     |     |
| 9             | 2.726     | 1563     | 265     |     |
| 10            | 3.454     | 1817     | 451     |     |
| 11            | 3.545     | 2141     | 563     |     |
| 12            | 3.632     | 3753     | 1156    |     |
| 13            | 3.730     | 20195    | 4932    |     |
| 14            | 3.967     | 180274   | 45931   |     |
| 15            | 4.231     | 5578970  | 1364969 |     |
| 16            | 4.784     | 20870    | 4097    |     |
| 17            | 5.978     | 1609     | 547     |     |
| 18            | 6.718     | 1749     | 928     |     |
| 19            | 6.786     | 4266     | 1690    |     |
| 20            | 7.727     | 4003     | 2065    |     |
| 21            | 8.128     | 3074     | 829     |     |
| 22            | 8.248     | 1174     | 407     |     |
| 23            | 8.414     | 1867     | 409     |     |
| 24            | 8.647     | 1576     | 277     |     |
| 25            | 9.838     | 5866     | 1629    |     |
| Total         |           | 21733263 | 6171589 |     |

Figure S33 – HPLC trace of the reaction forming compound 14.



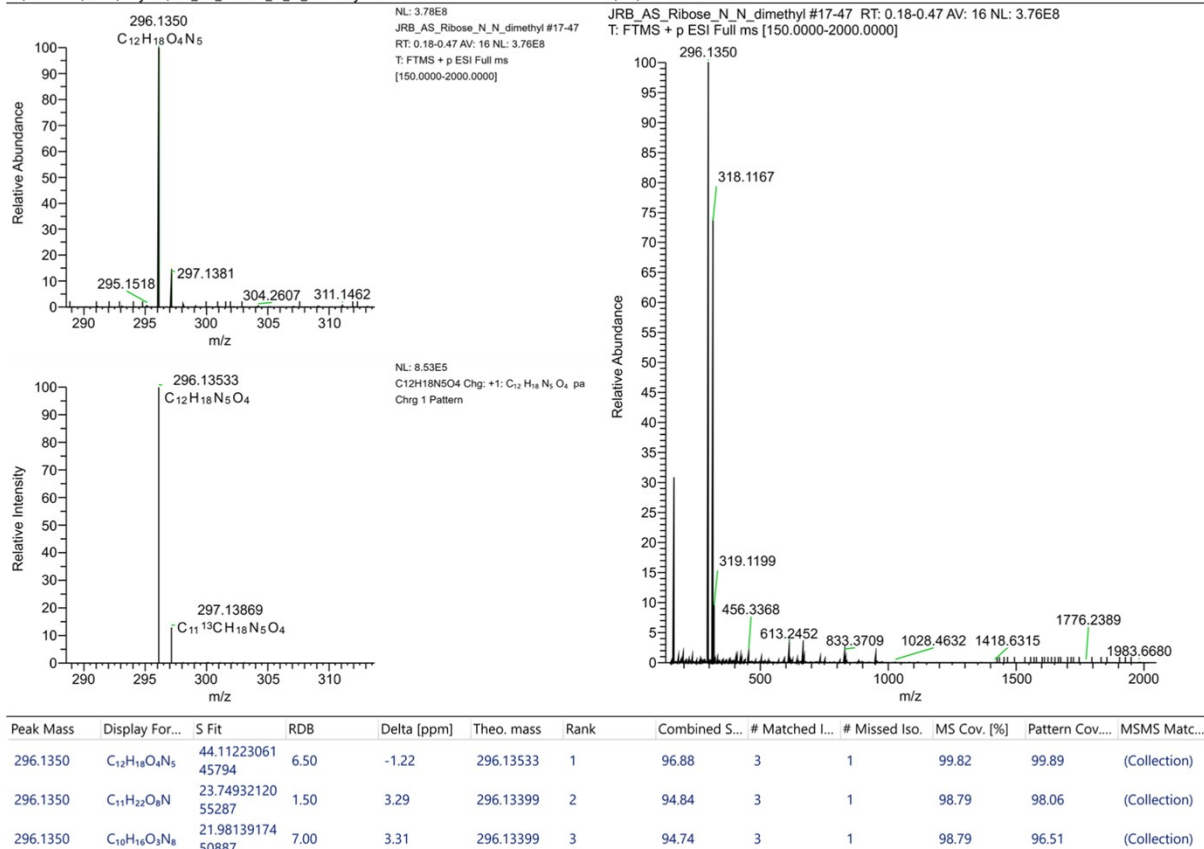

Figure S34 – HRMS of compound 14.

**2-bromo-deaza-ribose-purine (15)**

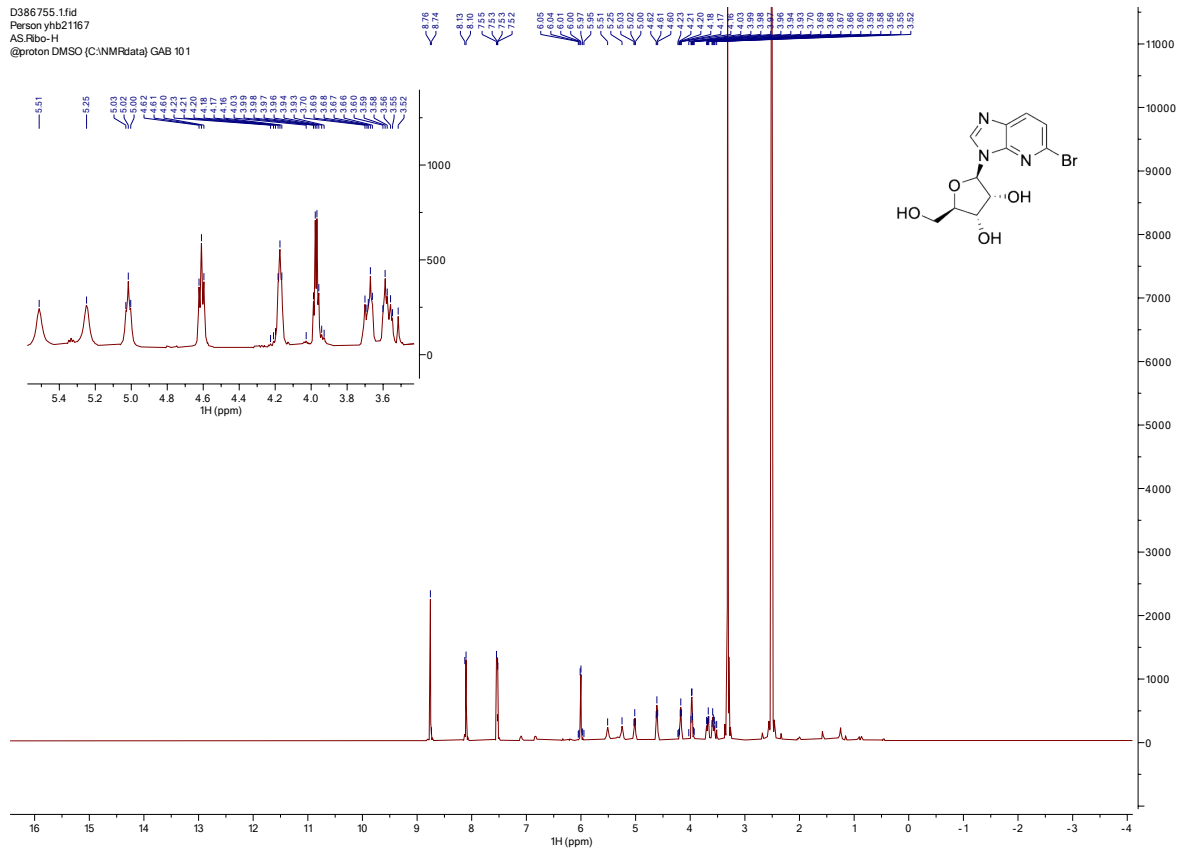

Figure S35 –  $^1\text{H}$  NMR of compound 15.

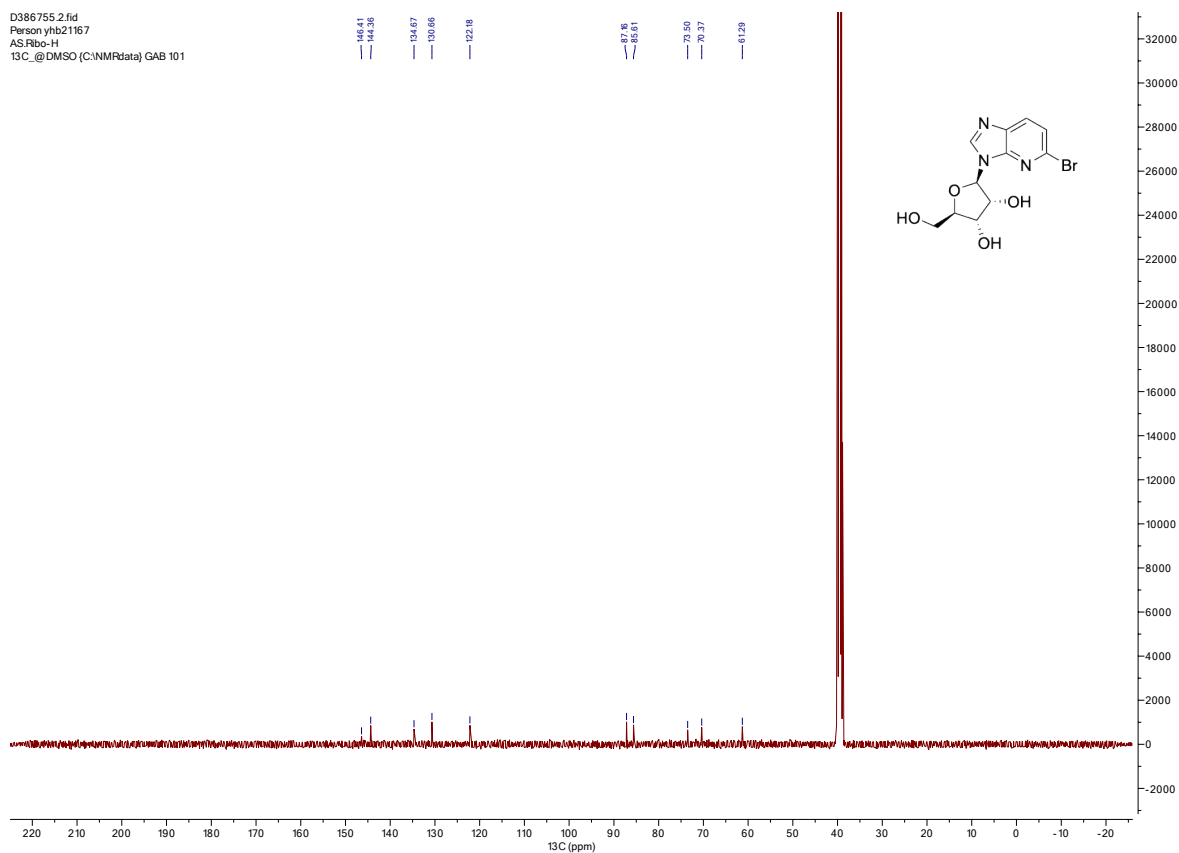

Figure S36 –  $^{13}\text{C}$  NMR of compound 15.

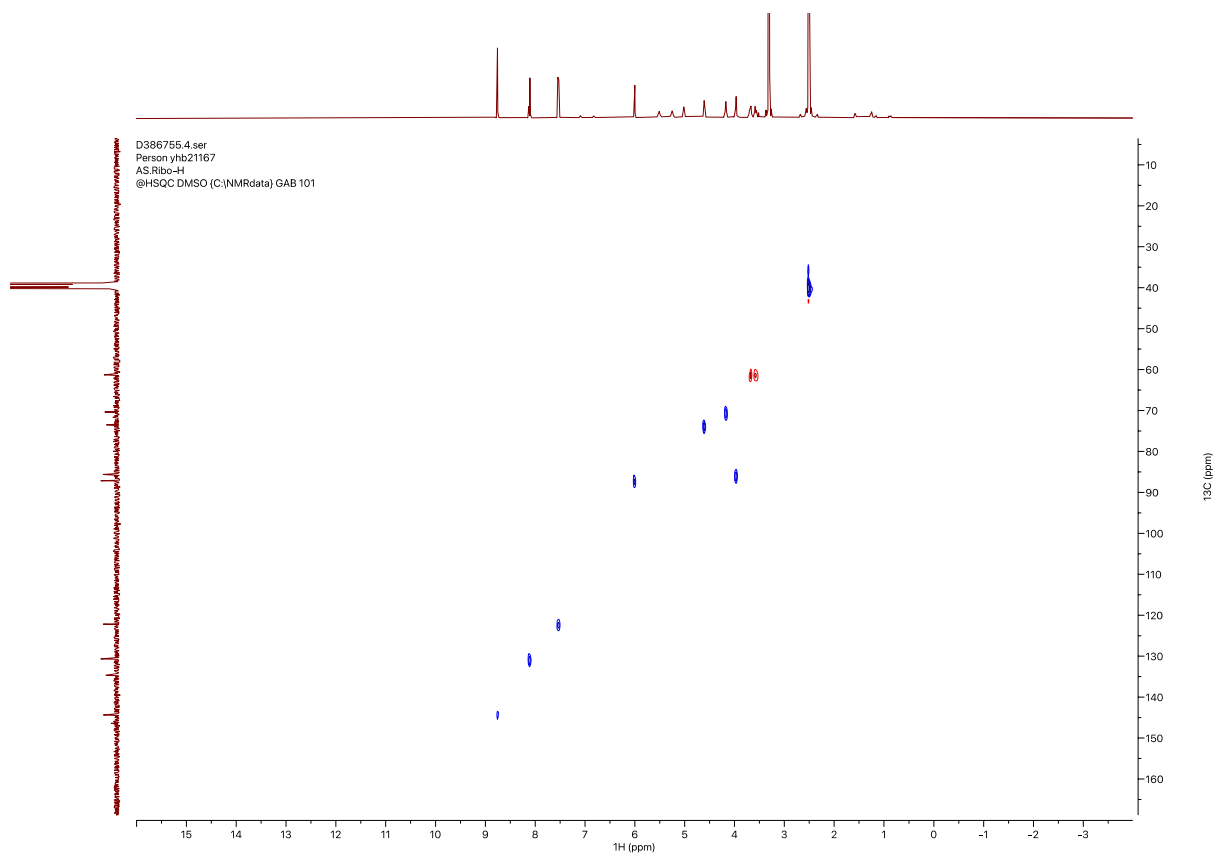

Figure S37 – HSQC of compound 15.

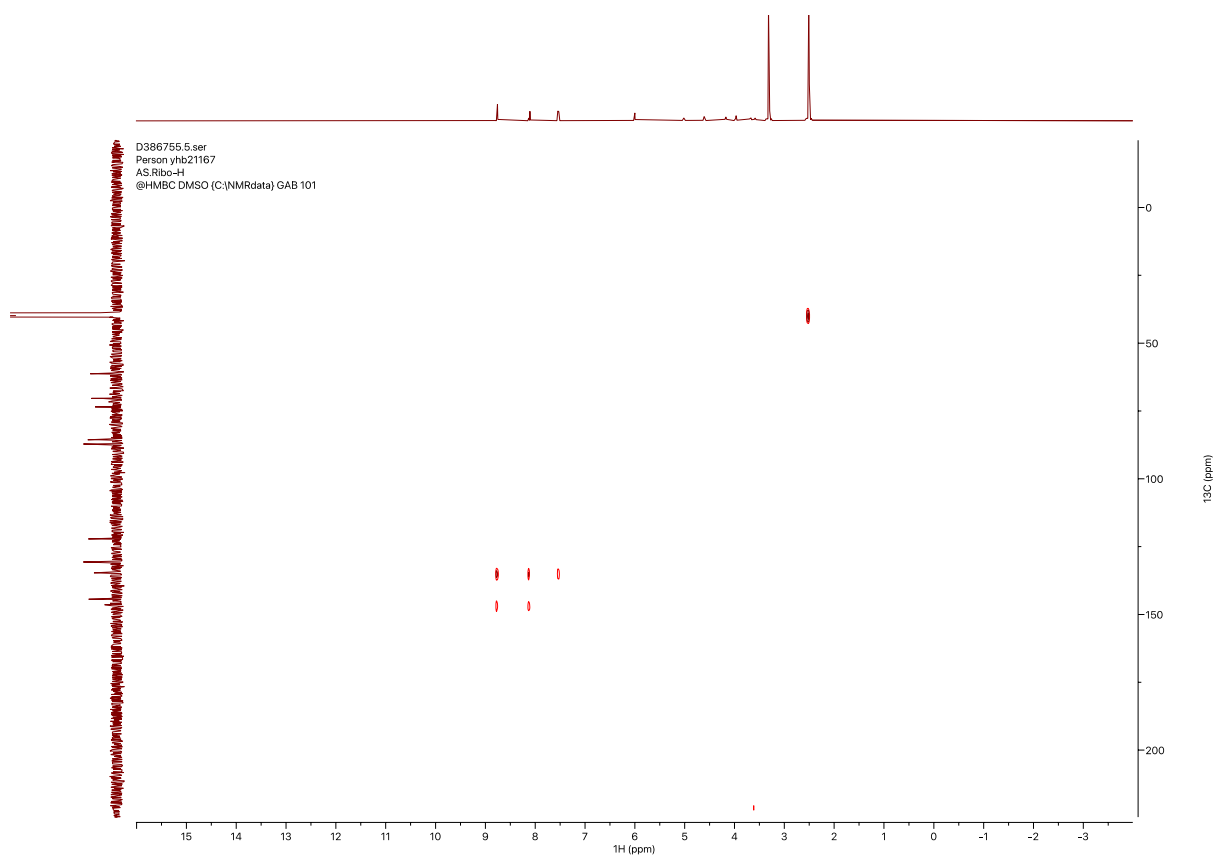

Figure S38 – HMBC of compound 15.

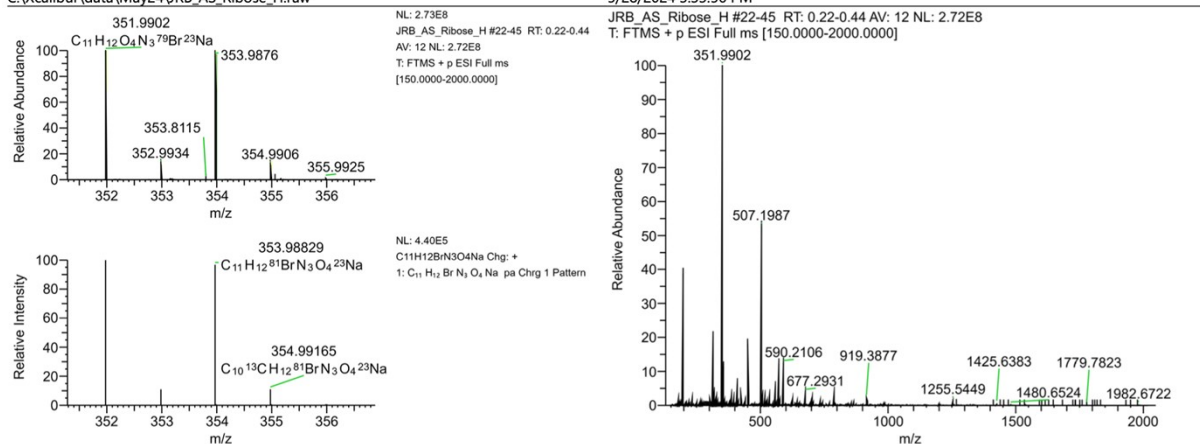

| Peak Mass | Display For...                                                                                  | S Fit                | RDB   | Delta [ppm] | Theo. mass | Rank | Combined S... | # Matched I... | # Missed Iso. | MS Cov. [%] | Pattern Cov.... | MSMS Matc... |
|-----------|-------------------------------------------------------------------------------------------------|----------------------|-------|-------------|------------|------|---------------|----------------|---------------|-------------|-----------------|--------------|
| 351.9902  | C <sub>11</sub> H <sub>12</sub> O <sub>4</sub> N <sub>3</sub> <sup>79</sup> Br <sup>23</sup> Na | 62.21859257<br>20359 | 6.50  | -0.34       | 351.99034  | 1    | 96.36         | 6              | 0             | 98.26       | 100             | (Collection) |
| 351.9902  | C <sub>9</sub> H <sub>10</sub> O <sub>3</sub> N <sub>6</sub> <sup>79</sup> Br <sup>23</sup> Na  | 52.71154644<br>80711 | 7.00  | 3.47        | 351.98900  | 2    | 95.82         | 5              | 0             | 98.21       | 100             | (Collection) |
| 351.9902  | C <sub>9</sub> H <sub>7</sub> O <sub>2</sub> N <sub>9</sub> <sup>79</sup> Br                    | 46.55954303<br>10779 | 10.50 | 0.45        | 351.99006  | 3    | 95.01         | 5              | 0             | 97.71       | 99.64           | (Collection) |
| 351.9902  | C <sub>10</sub> H <sub>13</sub> O <sub>7</sub> N <sub>2</sub> <sup>79</sup> Br                  | 39.88831211<br>799   | 5.00  | 0.44        | 351.99006  | 4    | 94.66         | 6              | 0             | 97.71       | 99.12           | (Collection) |
| 351.9902  | C <sub>9</sub> H <sub>11</sub> O <sub>6</sub> N <sub>5</sub> <sup>79</sup> Br                   | 23.11130448<br>46924 | 5.50  | 4.25        | 351.98872  | 5    | 84.14         | 6              | 0             | 87.53       | 91.1            | (Collection) |
| 351.9902  | C <sub>9</sub> H <sub>6</sub> O <sub>10</sub> N <sub>4</sub> <sup>23</sup> Na                   | 26.26700476<br>18208 | 9.00  | 1.22        | 351.98979  | 6    | 48.2          | 2              | 2             | 49.42       | 97.69           | (Collection) |
| 351.9902  | C <sub>10</sub> H <sub>8</sub> O <sub>14</sub>                                                  | 26.21917793<br>79565 | 7.00  | -1.81       | 351.99086  | 7    | 48.2          | 2              | 2             | 49.42       | 96.88           | (Collection) |
| 351.9902  | C <sub>9</sub> H <sub>2</sub> O <sub>4</sub> N <sub>7</sub>                                     | 24.67102669<br>3524  | 12.50 | -1.80       | 351.99085  | 8    | 48.12         | 2              | 2             | 49.42       | 97.86           | (Collection) |
| 351.9902  | C <sub>10</sub> H <sub>10</sub> N <sub>6</sub> <sup>23</sup> Na                                 | 24.29927918<br>03204 | 14.00 | -2.58       | 351.99113  | 9    | 48.1          | 2              | 2             | 49.42       | 98.37           | (Collection) |
| 351.9902  | C <sub>11</sub> H <sub>7</sub> O <sub>11</sub> N <sup>23</sup> Na                               | 23.69234712<br>16253 | 8.50  | -2.59       | 351.99113  | 10   | 48.06         | 2              | 2             | 49.42       | 97.38           | (Collection) |

Figure S39 – HRMS of compound 15.

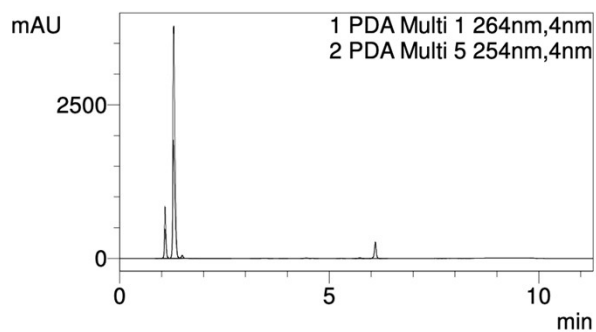

| Peak# | Ret. Time | Area     | Height  | ID# |
|-------|-----------|----------|---------|-----|
| 1     | 0.890     | 1315     | 601     |     |
| 2     | 0.960     | 3423     | 1253    |     |
| 3     | 1.085     | 2121338  | 829090  |     |
| 4     | 1.289     | 12963039 | 3716184 |     |
| 5     | 1.494     | 160852   | 52096   |     |
| 6     | 1.624     | 7248     | 1210    |     |
| 7     | 1.806     | 3927     | 682     |     |
| 8     | 1.931     | 3121     | 436     |     |
| 9     | 2.152     | 1627     | 190     |     |
| 10    | 2.376     | 1072     | 165     |     |
| 11    | 2.476     | 2487     | 459     |     |
| 12    | 2.592     | 1090     | 211     |     |
| 13    | 3.198     | 1038     | 265     |     |
| 14    | 3.392     | 4191     | 1066    |     |
| 15    | 3.496     | 20191    | 4943    |     |
| 16    | 3.926     | 2877     | 641     |     |
| 17    | 4.456     | 43716    | 9490    |     |
| 18    | 4.601     | 7702     | 1934    |     |
| 19    | 5.291     | 4748     | 1145    |     |
| 20    | 5.735     | 43295    | 9937    |     |
| 21    | 6.103     | 747862   | 244812  |     |
| 22    | 7.627     | 1102     | 288     |     |

Figure S40 – HPLC trace of the reaction forming compound 15.

## N-6-methyl-adenosine (13)

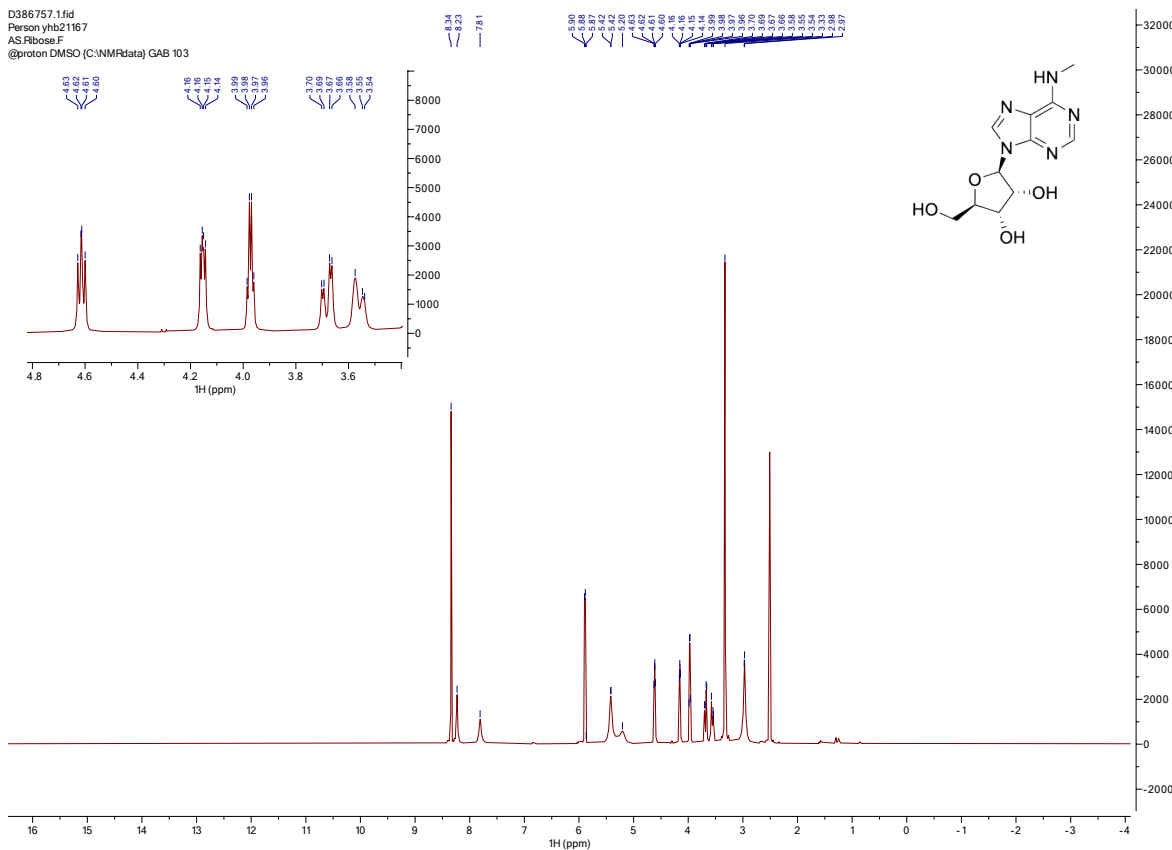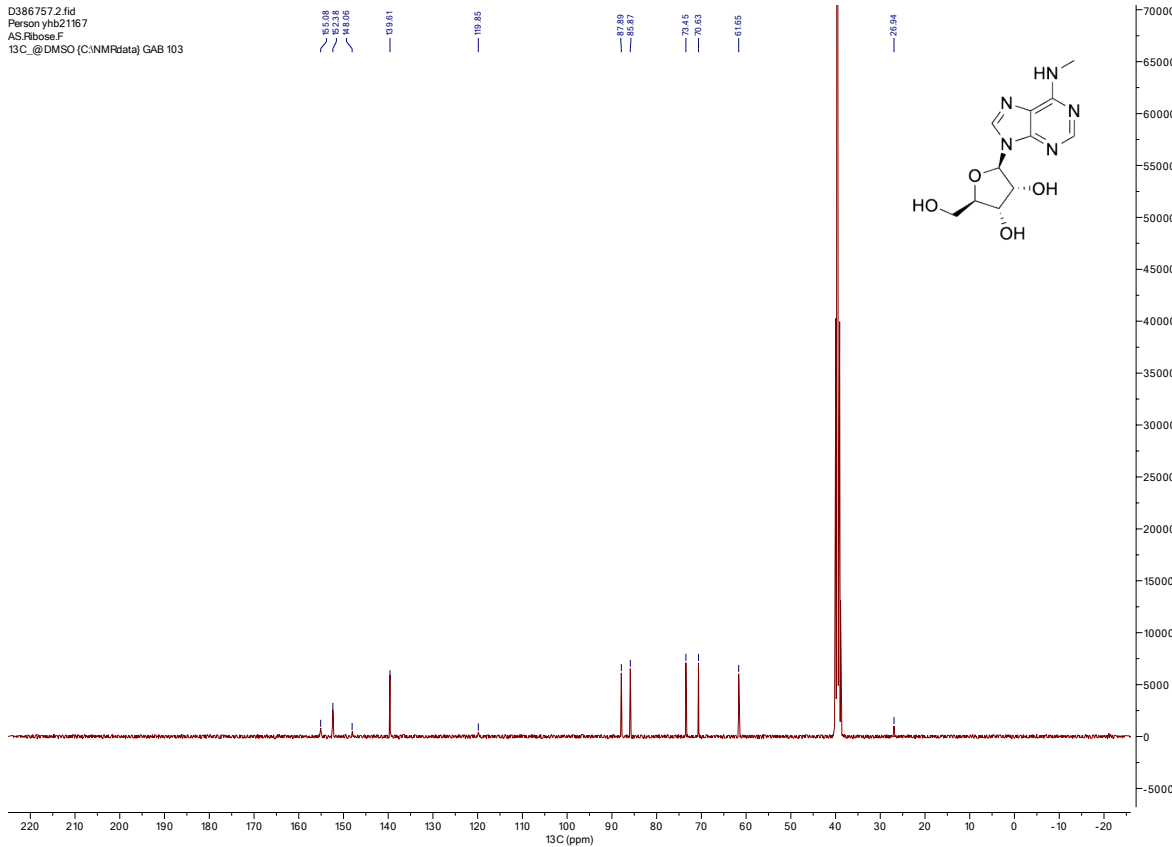

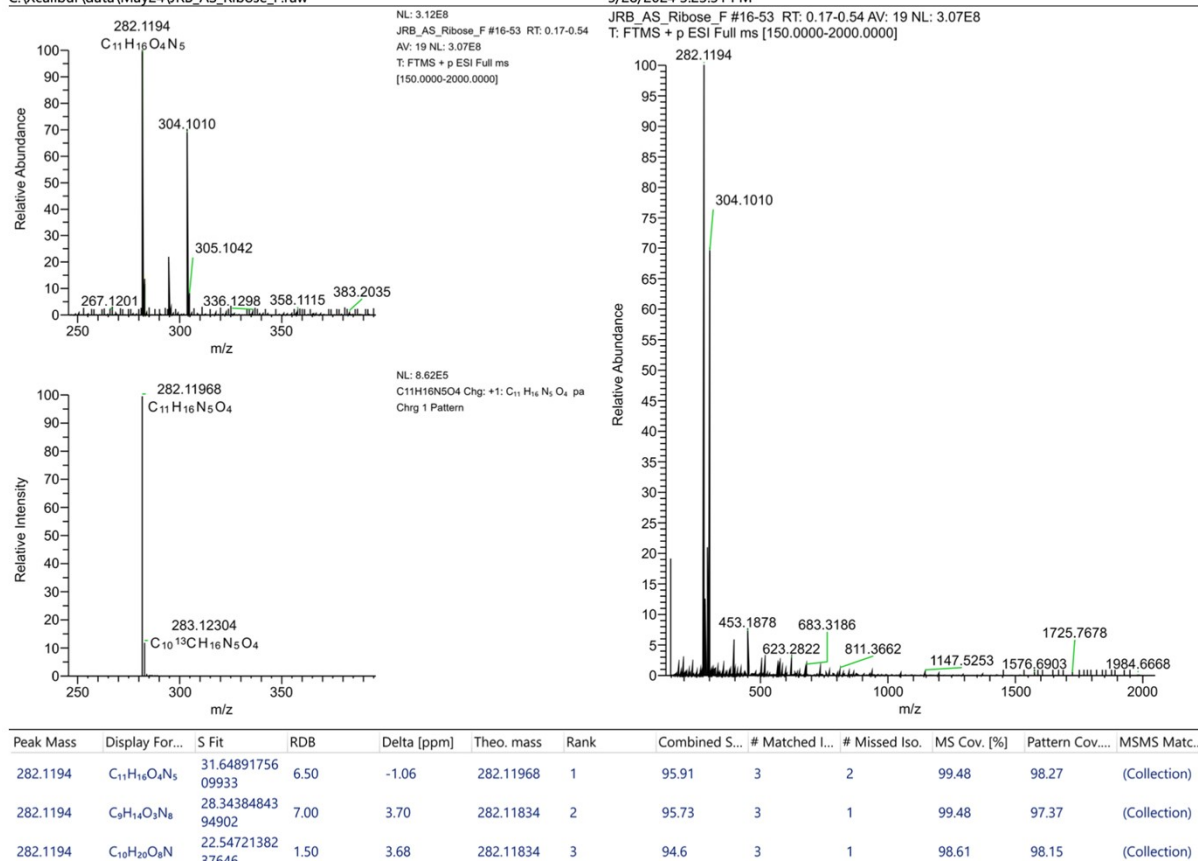

Figure S43 – HRMS of compound 13.

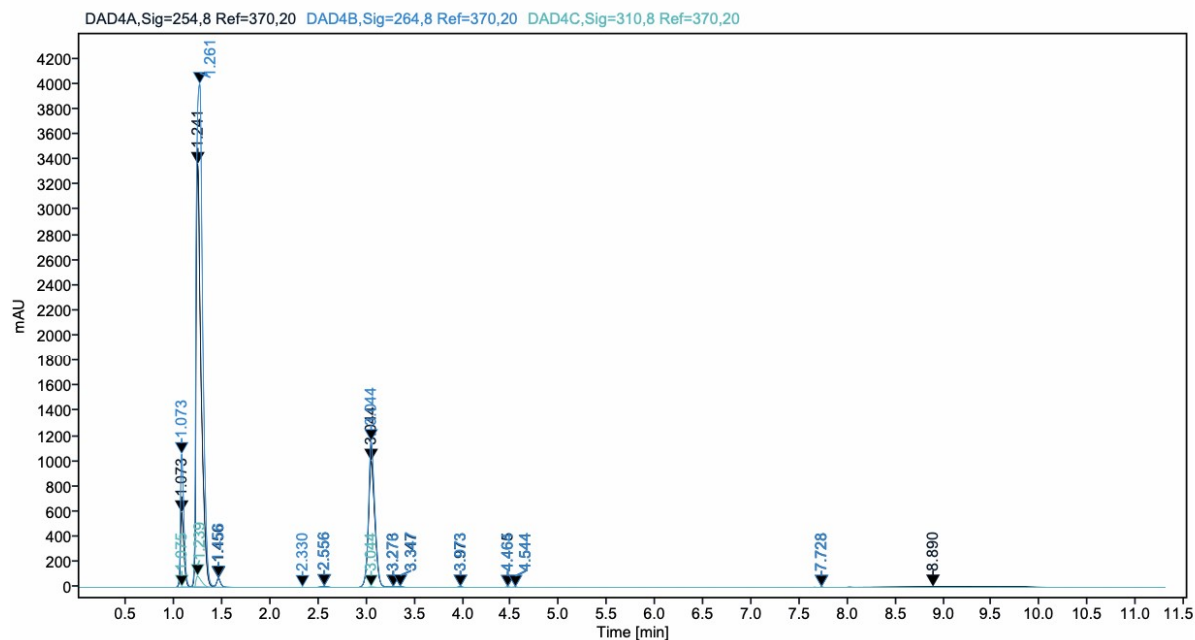

Figure S44 – HPLC trace of the reaction forming compound 13.

## 2-fluoro-ribosyl-adenosine (12)

D386828.1.fid  
Person yhb21167  
AS.Fibrose.K  
@proton DMSO (C:\NMR\data) GAB 100

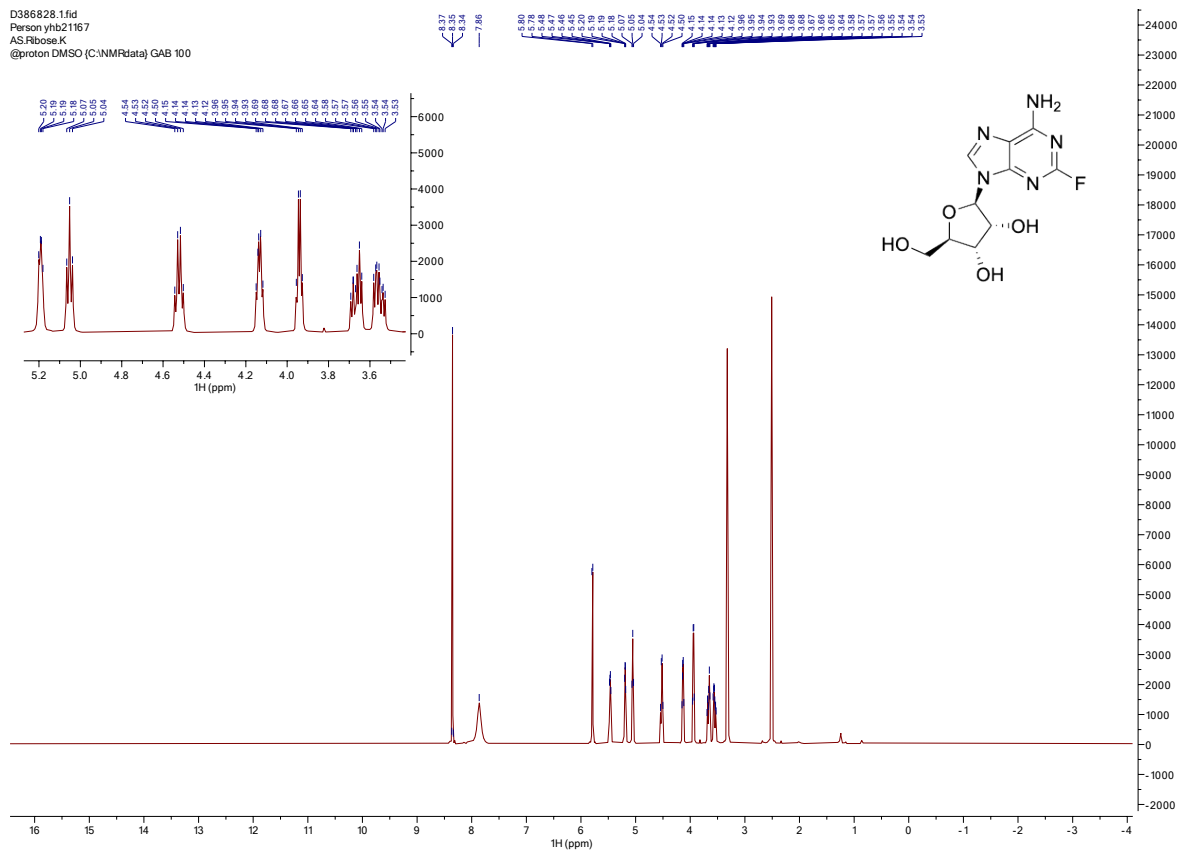

Figure S45 – <sup>1</sup>H NMR of compound 12.

D386828.4.fid  
Person yhb21167  
AS.Fibrose.K  
13C\_@DMSO (C:\NMR\data) GAB 100

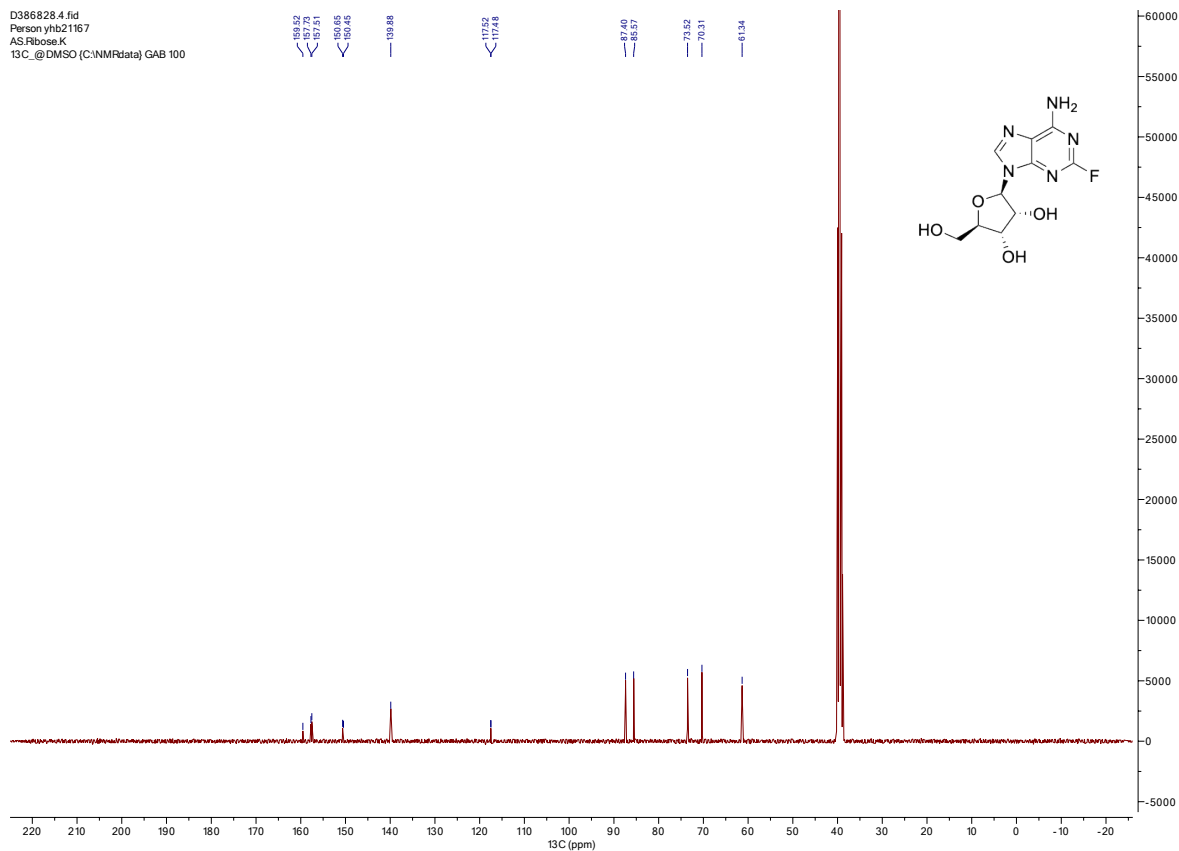

Figure S46 – <sup>13</sup>C NMR of compound 12.

D386828.2.fid  
Person yhb21167  
AS.Ribose.K  
@19F DMSO (C:\NMRdata) GAB 100

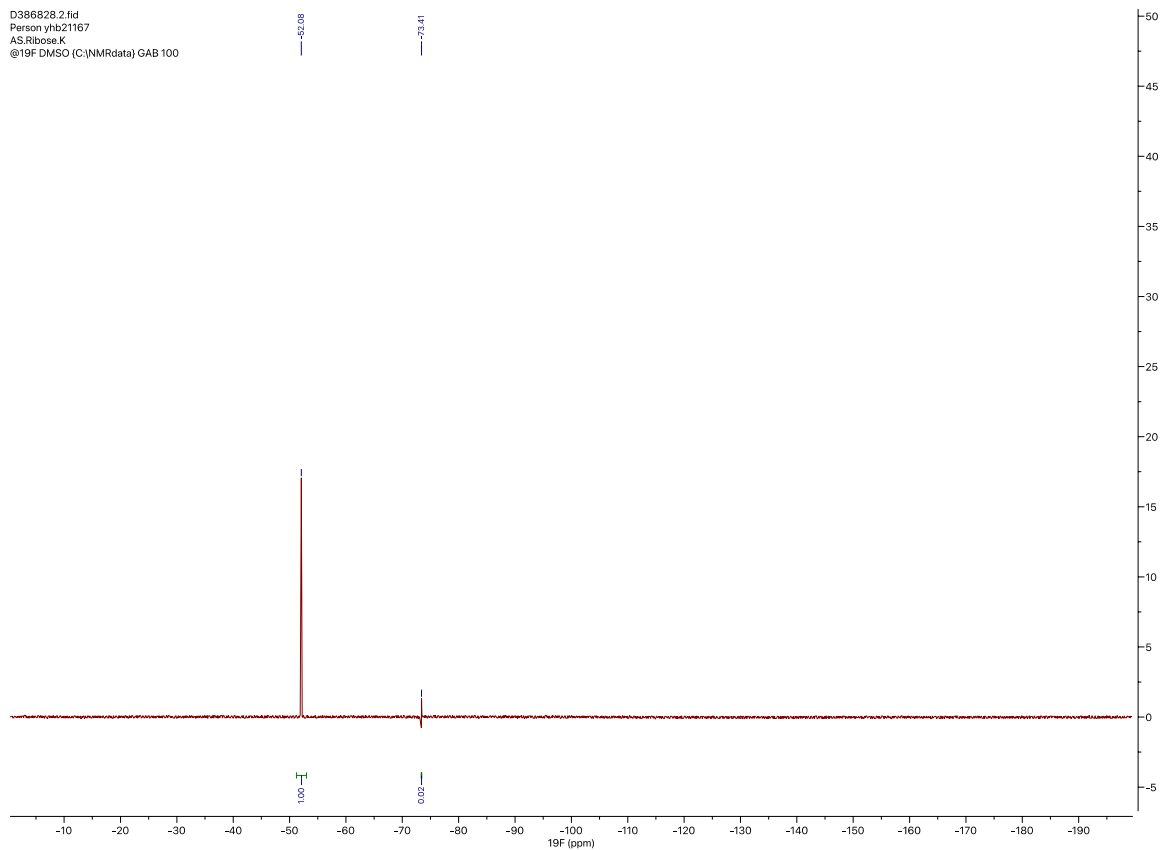

Figure S47 – <sup>19</sup>F NMR of compound 12.

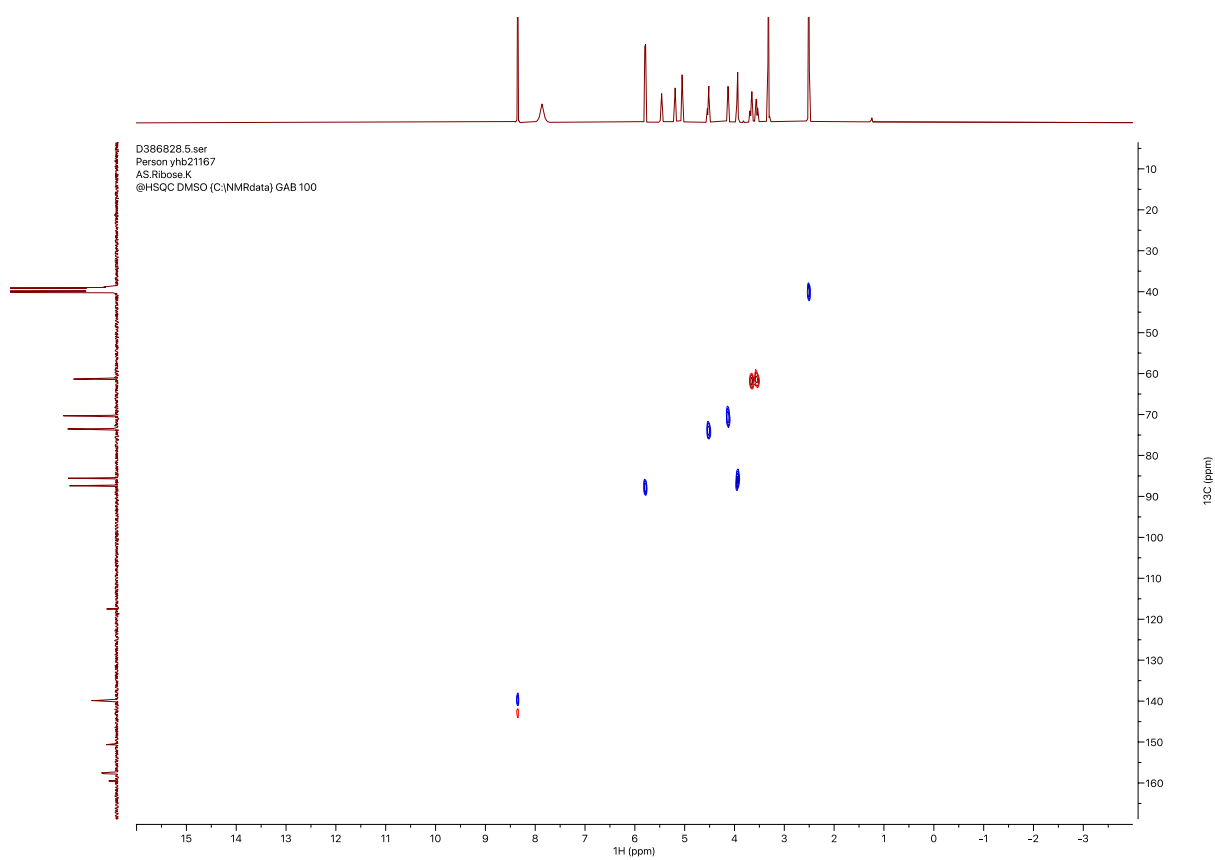

Figure S48 – HSQC of compound 12.



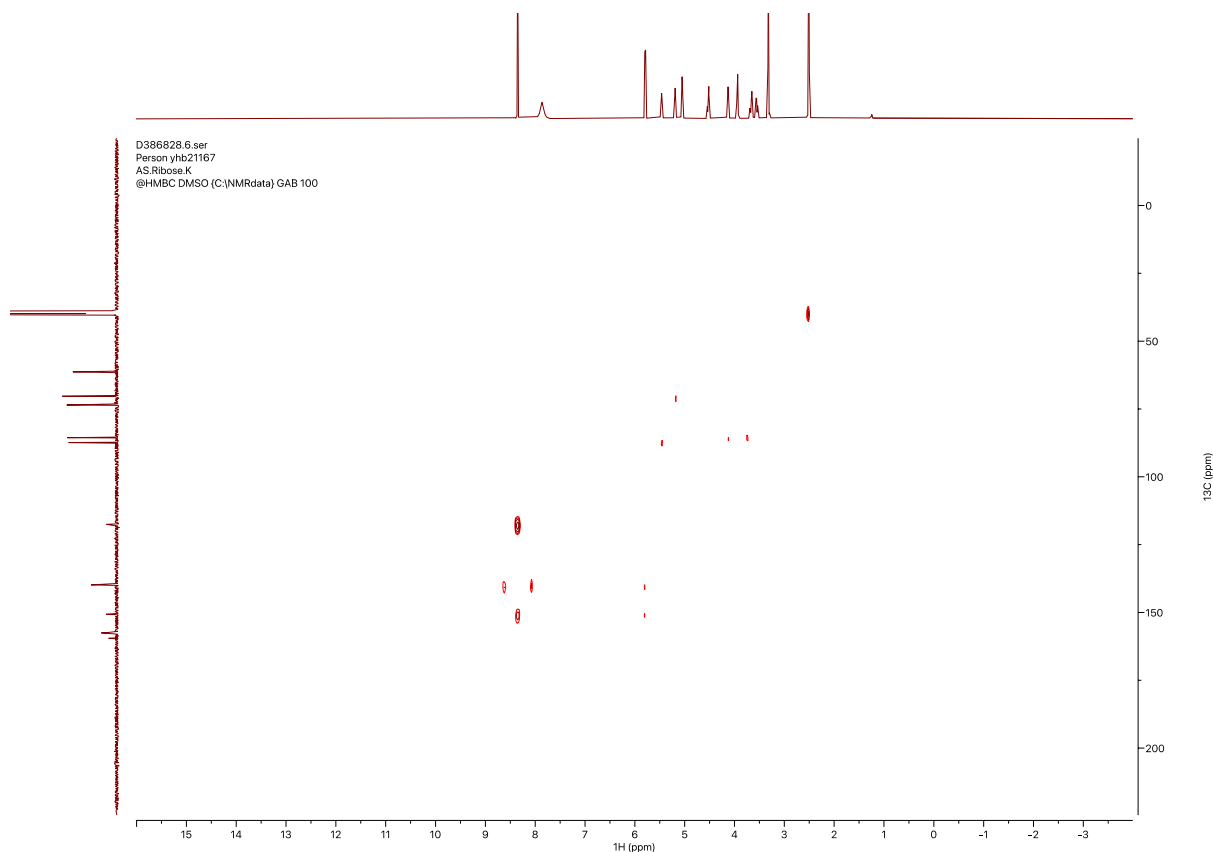

Figure S49 -HMBC of compound 12.

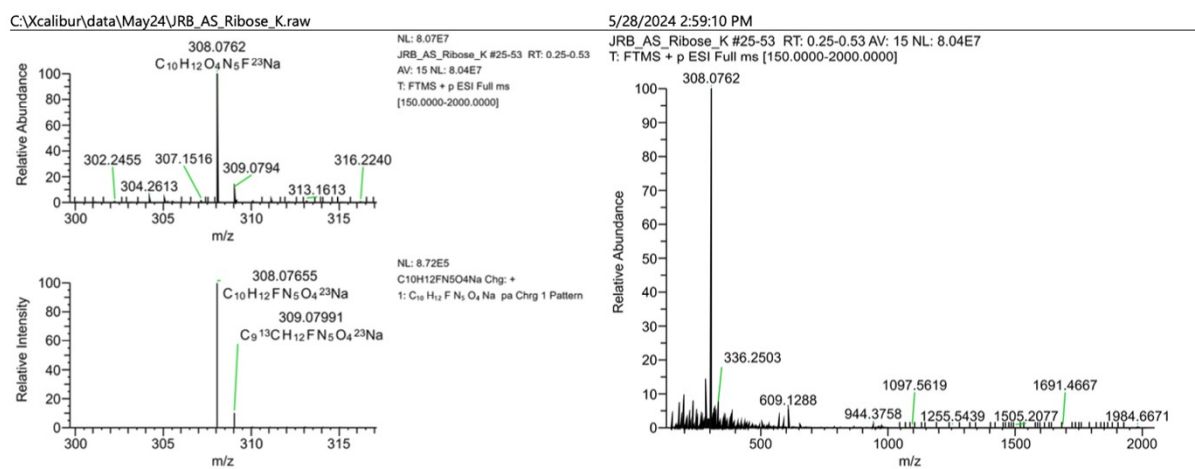

| Peak Mass | Display For...            | S Fit                | RDB   | Delta [ppm] | Theo. mass | Rank | Combined S... | # Matched I... | # Missed Iso. | MS Cov. [%] | Pattern Cov... | MSMS Matc... |
|-----------|---------------------------|----------------------|-------|-------------|------------|------|---------------|----------------|---------------|-------------|----------------|--------------|
| 308.0762  | $C_{10}H_{12}O_4N_5F^2Na$ | 69.94802195<br>30015 | 6.50  | -1.21       | 308.07655  | 1    | 94.34         | 3              | 0             | 95.69       | 100            | (Collection) |
| 308.0762  | $C_{13}H_8O_2N_8$         | 42.35095267<br>04321 | 14.00 | -0.95       | 308.07647  | 2    | 92.88         | 3              | 0             | 95.69       | 100            | (Collection) |
| 308.0762  | $C_9H_{13}O_7N_4F$        | 28.90863980<br>92613 | 5.00  | -0.32       | 308.07628  | 3    | 91.35         | 4              | 0             | 94.82       | 98.35          | (Collection) |
| 308.0762  | $C_8H_{16}O_8NF^{23}Na$   | 23.93237471<br>31893 | 1.50  | 3.13        | 308.07522  | 4    | 91.09         | 4              | 0             | 94.82       | 98.16          | (Collection) |
| 308.0762  | $C_8H_{10}O_3N_8F^2Na$    | 21.51782867<br>83281 | 7.00  | 3.15        | 308.07521  | 5    | 90.96         | 3              | 1             | 94.82       | 96.54          | (Collection) |
| 308.0762  | $C_8H_{17}O_{11}F$        | 19.17402302<br>3016  | 0.00  | 4.02        | 308.07494  | 6    | 90.84         | 4              | 0             | 94.82       | 97.64          | (Collection) |
| 308.0762  | $C_{12}H_{12}O_6N_4$      | 18.14357719<br>3473  | 9.00  | 3.39        | 308.07514  | 7    | 90.79         | 4              | 0             | 94.82       | 98.33          | (Collection) |
| 308.0762  | $C_{13}H_{11}O_3N_8F^2Na$ | 31.53867102<br>27055 | 10.50 | 2.50        | 308.07541  | 8    | 84.07         | 4              | 0             | 86.99       | 87.7           | (Collection) |
| 308.0762  | $C_{14}H_{17}O_7N$        | 13.12830155<br>72298 | 8.50  | -0.97       | 308.07648  | 9    | 82.21         | 4              | 0             | 86.05       | 84.86          | (Collection) |
| 308.0762  | $C_{15}H_{15}O_4N_2^2Na$  | 12.40597434<br>75467 | 10.00 | -1.86       | 308.07675  | 10   | 82.18         | 4              | 0             | 86.05       | 84.48          | (Collection) |

Figure S50 – HRMS of compound 12.

Sample Name : k  
 Sample ID :  
 Data Filename : 4 and K\_19032024\_005.lcd  
 Method Filename : Admir Trans glyco Run.lcm  
 Batch Filename : 4 and K.lcb  
 Vial # : 1-26  
 Injection Volume : 10 uL  
 Date Acquired : 19/03/2024 21:51:08  
 Date Processed : 19/03/2024 22:02:29

Sample Type : Unknown  
 Acquired by : Shimadzu  
 Processed by : Shimadzu

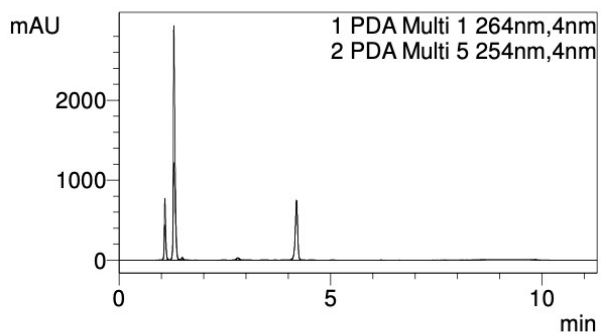

| PDA Ch1 264nm |           |          |         |     |
|---------------|-----------|----------|---------|-----|
| Peak#         | Ret. Time | Area     | Height  | ID# |
| 1             | 0.896     | 1029     | 468     |     |
| 2             | 1.086     | 1905762  | 760215  |     |
| 3             | 1.298     | 8430723  | 2840893 |     |
| 4             | 1.495     | 102060   | 30828   |     |
| 5             | 1.802     | 2755     | 416     |     |
| 6             | 2.481     | 9299     | 1572    |     |
| 7             | 2.810     | 142491   | 29716   |     |
| 8             | 2.970     | 10788    | 1804    |     |
| 9             | 3.093     | 6097     | 1514    |     |
| 10            | 3.382     | 3642     | 859     |     |
| 11            | 3.490     | 13763    | 3226    |     |
| 12            | 3.698     | 6394     | 1849    |     |
| 13            | 3.950     | 29391    | 3003    |     |
| 14            | 4.198     | 2940712  | 736251  |     |
| 15            | 4.506     | 1261     | 401     |     |
| 16            | 4.591     | 4429     | 1179    |     |
| 17            | 5.054     | 10368    | 2672    |     |
| 18            | 6.201     | 2421     | 725     |     |
| 19            | 7.709     | 1578     | 725     |     |
| 20            | 8.101     | 2597     | 782     |     |
| 21            | 8.222     | 1350     | 425     |     |
| 22            | 8.395     | 1634     | 390     |     |
| 23            | 8.536     | 1412     | 211     |     |
| 24            | 8.629     | 1369     | 267     |     |
| 25            | 9.838     | 5740     | 1462    |     |
| Total         |           | 13639065 | 4421852 |     |

Figure S51 – HPLC trace of the reaction forming compound 12.

**5-trifluorouridine (20)**

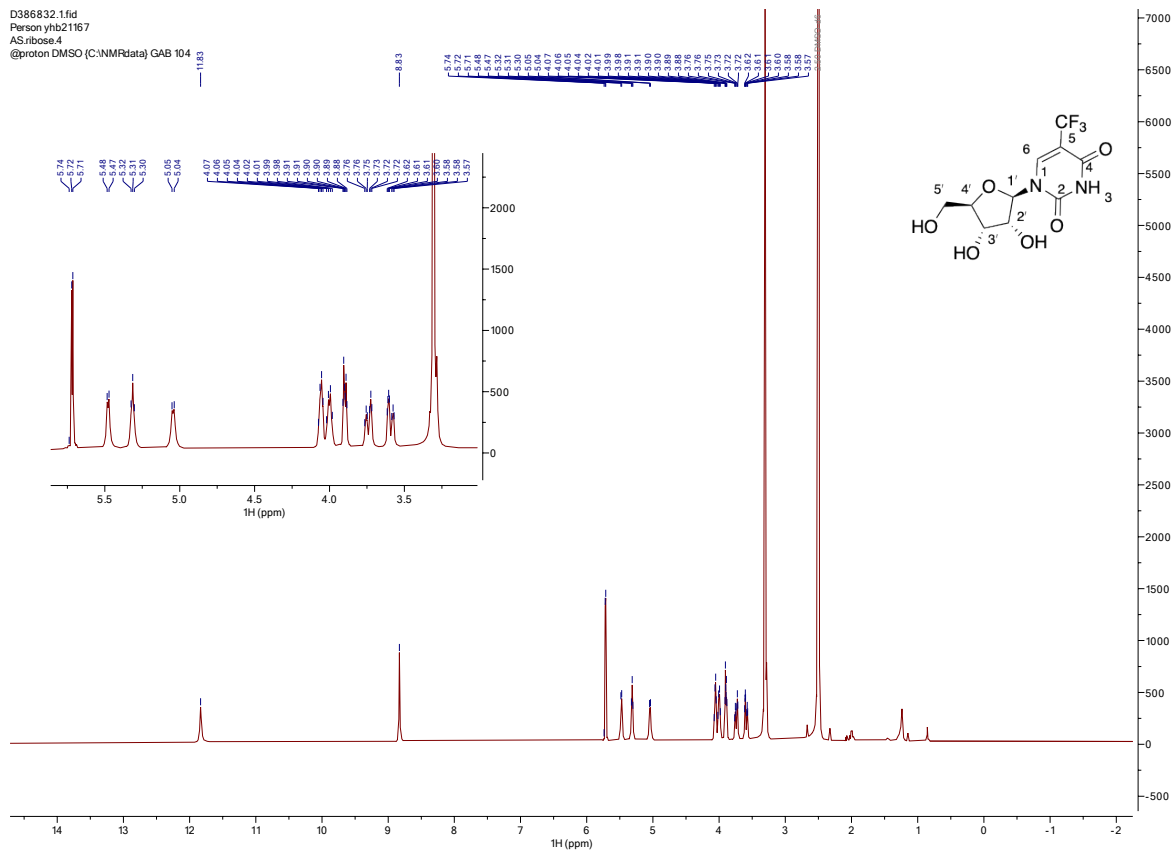

Figure S52 – <sup>1</sup>H NMR of compound 20.

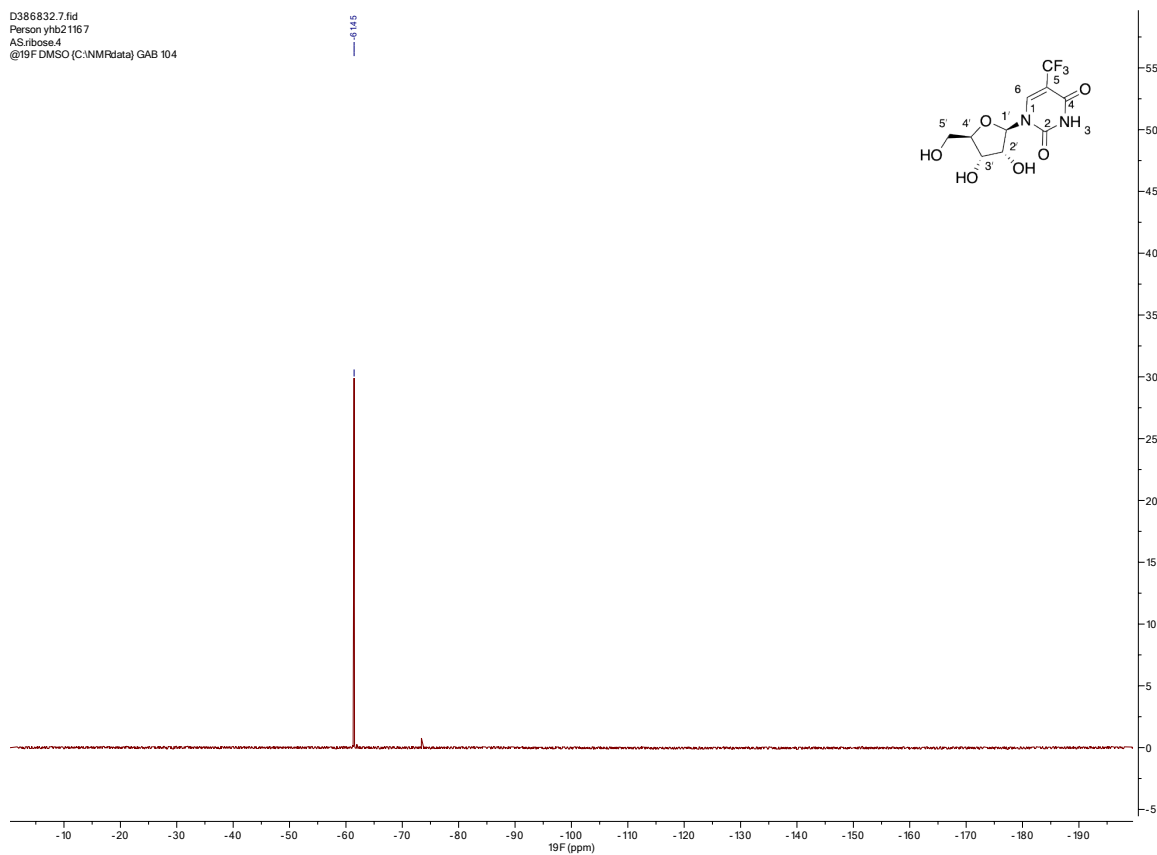

Figure S53 – <sup>19</sup>F NMR of compound 20.

D388247.3.fid  
Person yhb21167  
AS.ribo-4  
13C\_@\_DMSO (C:\NMRdata) GAB 83

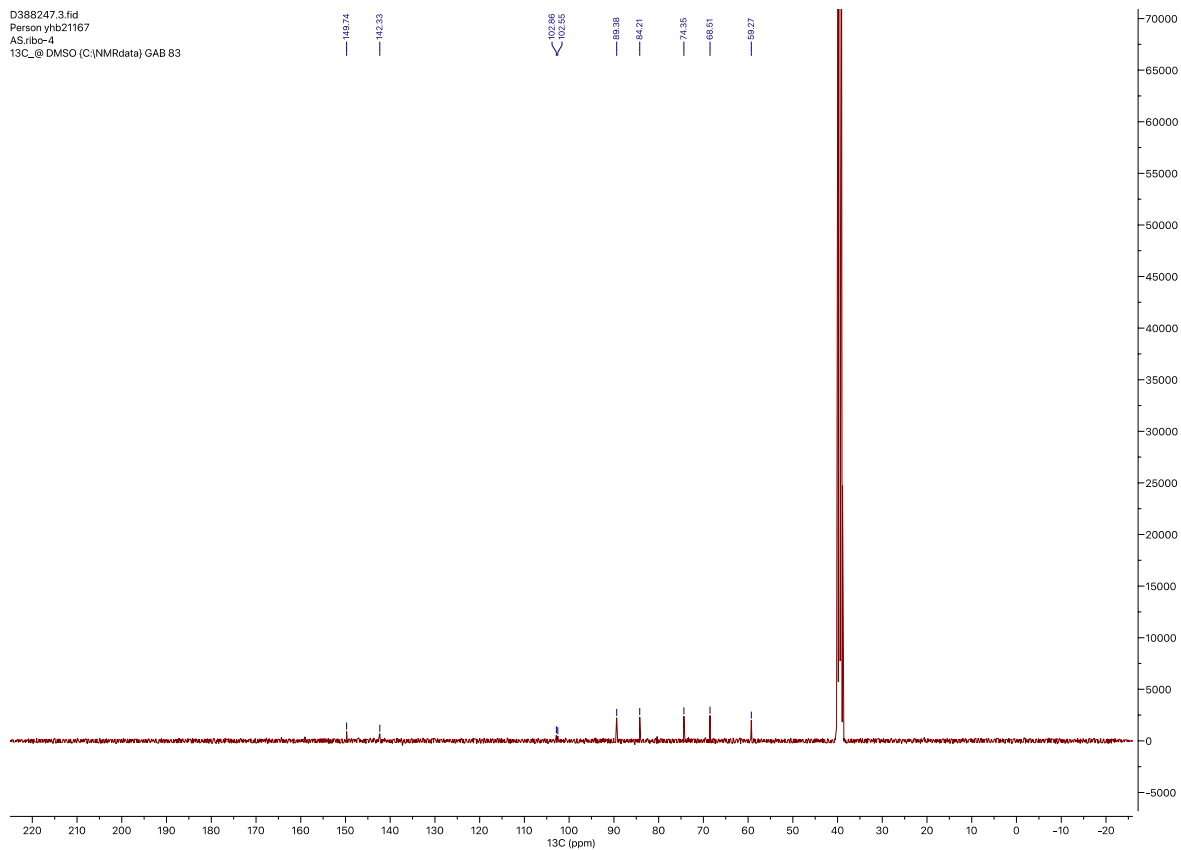

Figure S54 – <sup>13</sup>C NMR of compound 20.

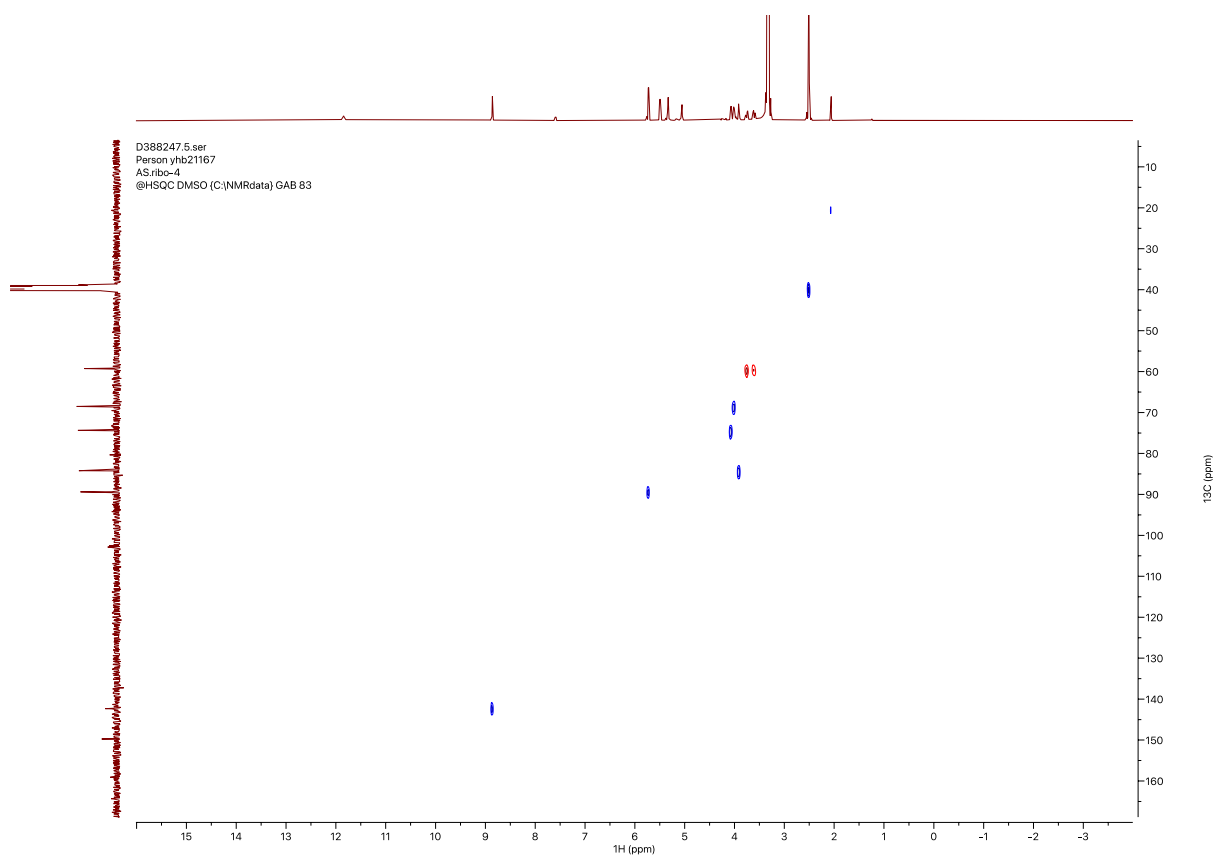

Figure S55 – HSQC of compound 20.

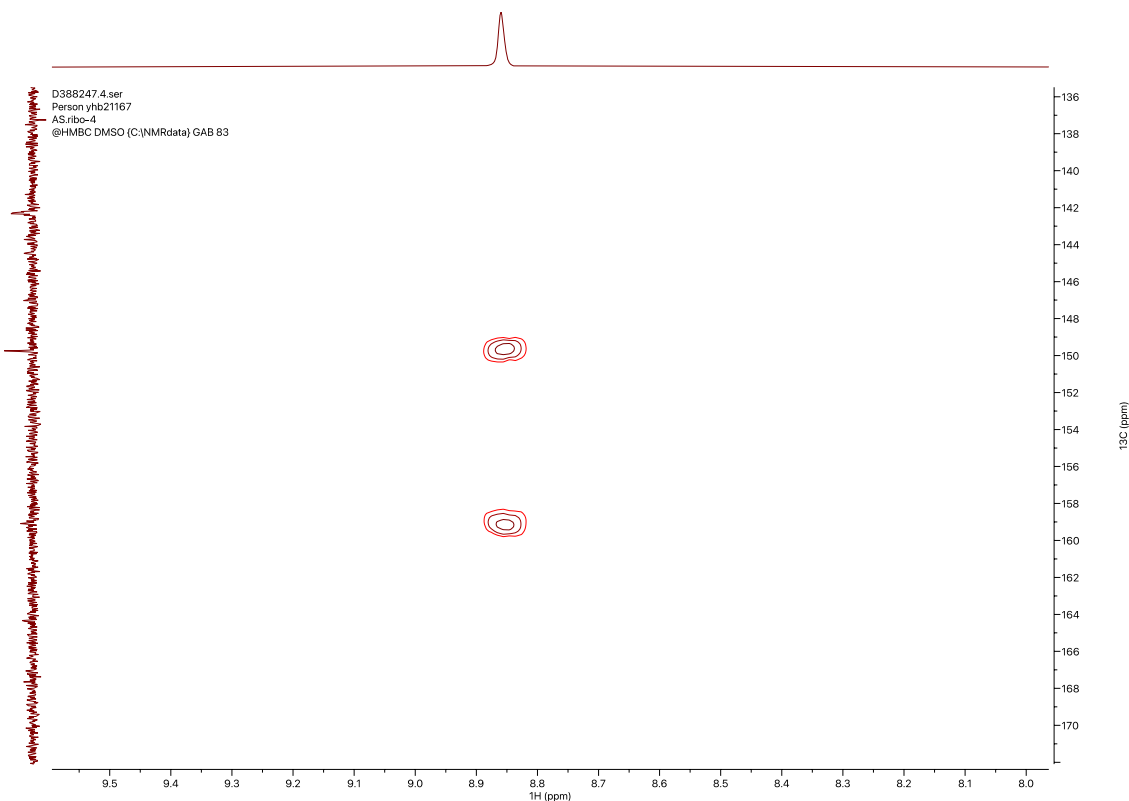

Figure S56 – HMBC of compound 20 showing the cross peaks from C6H to C4 and C6.

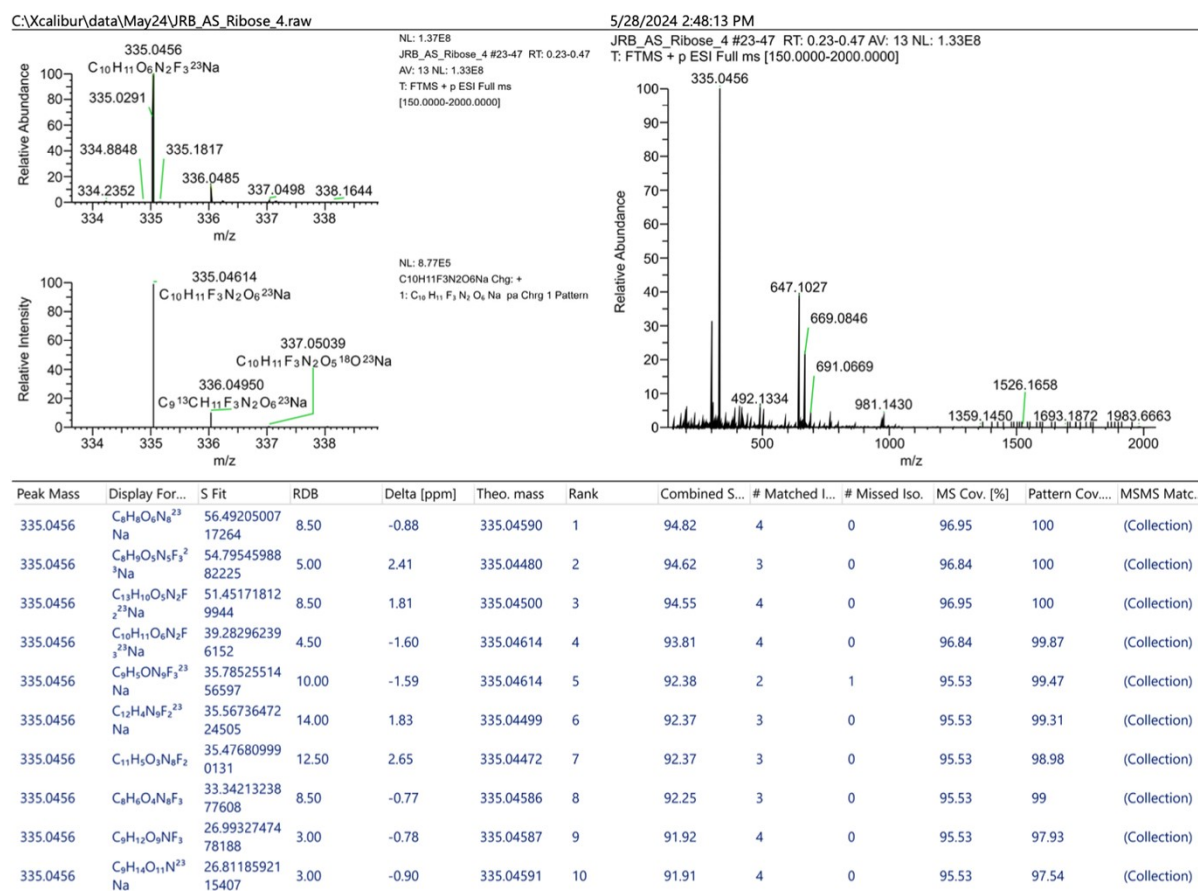

Figure S57 – HRMS of compound 20.

Sample Name : 4  
 Sample ID :  
 Data Filename : runs\_25032024\_003.lcd  
 Method Filename : Admir Trans glyco Run.lcm  
 Batch Filename : runs.lcb  
 Vial # : 1-63  
 Injection Volume : 10 uL  
 Date Acquired : 25/03/2024 11:23:03  
 Date Processed : 25/03/2024 11:34:23

Sample Type : Unknown  
 Acquired by : Shimadzu  
 Processed by : Shimadzu

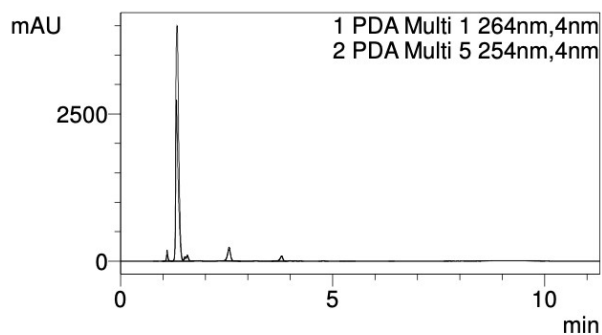

| Peak# | Ret. Time | Area     | Height  | ID# |
|-------|-----------|----------|---------|-----|
| 1     | 0.812     | 1298     | 445     |     |
| 2     | 1.100     | 436475   | 183918  |     |
| 3     | 1.335     | 19166266 | 3987437 |     |
| 4     | 1.579     | 549655   | 99232   |     |
| 5     | 1.867     | 45744    | 8776    |     |
| 6     | 2.335     | 14001    | 1922    |     |
| 7     | 2.562     | 1019476  | 194018  |     |
| 8     | 3.204     | 21302    | 3751    |     |
| 9     | 3.445     | 3556     | 637     |     |
| 10    | 3.801     | 414742   | 87331   |     |
| 11    | 4.006     | 26488    | 8010    |     |
| 12    | 4.119     | 7373     | 1620    |     |
| 13    | 4.249     | 6173     | 1663    |     |
| 14    | 4.789     | 9635     | 2255    |     |
| 15    | 5.239     | 1833     | 533     |     |
| 16    | 5.438     | 3056     | 758     |     |
| 17    | 6.377     | 1158     | 423     |     |
| 18    | 7.674     | 1571     | 581     |     |
| 19    | 7.754     | 6667     | 3310    |     |
| 20    | 8.137     | 1373     | 462     |     |
| 21    | 8.248     | 1232     | 307     |     |
| 22    | 8.418     | 2607     | 1179    |     |
| 23    | 8.650     | 2779     | 324     |     |
| 24    | 9.608     | 4613     | 175     |     |
| 25    | 9.850     | 7752     | 1689    |     |
| Total |           | 21756823 | 4590757 |     |

Figure S58 – HPLC trace of the reaction forming compound 20.

### 5-fluorouridine (19)

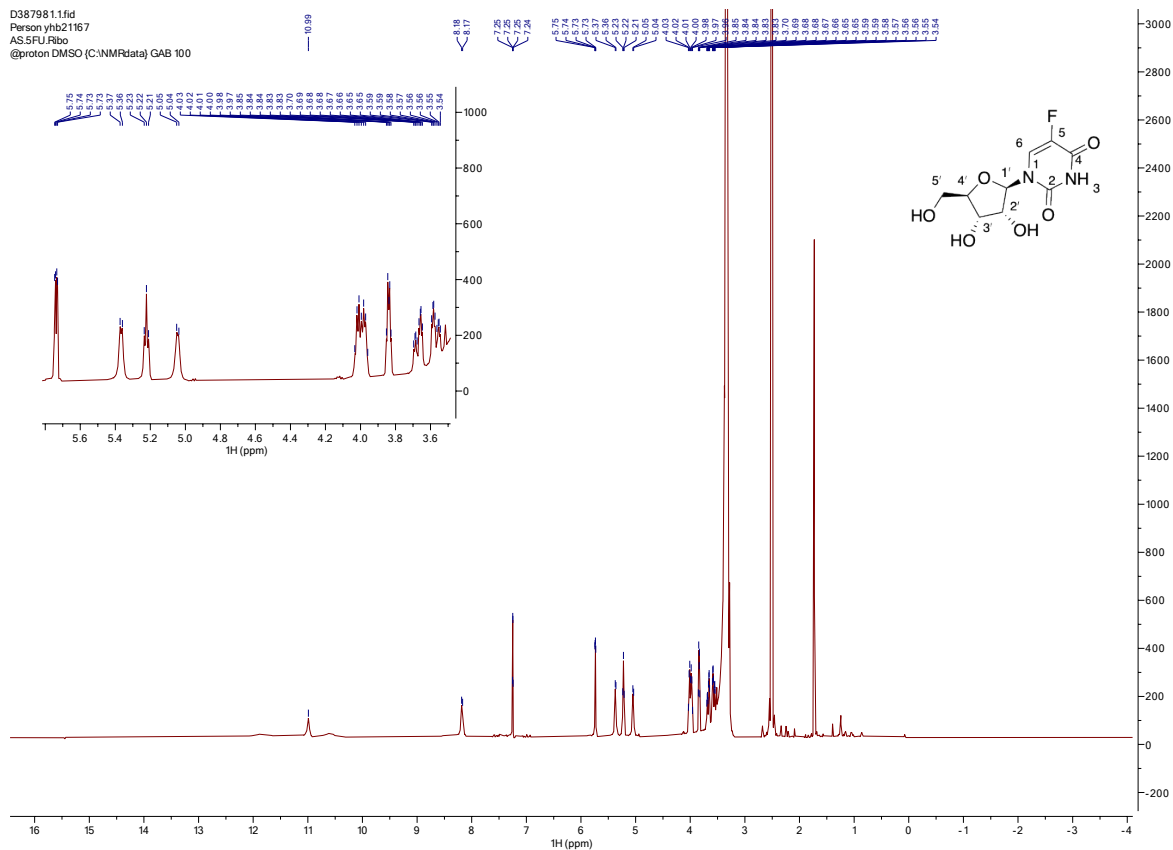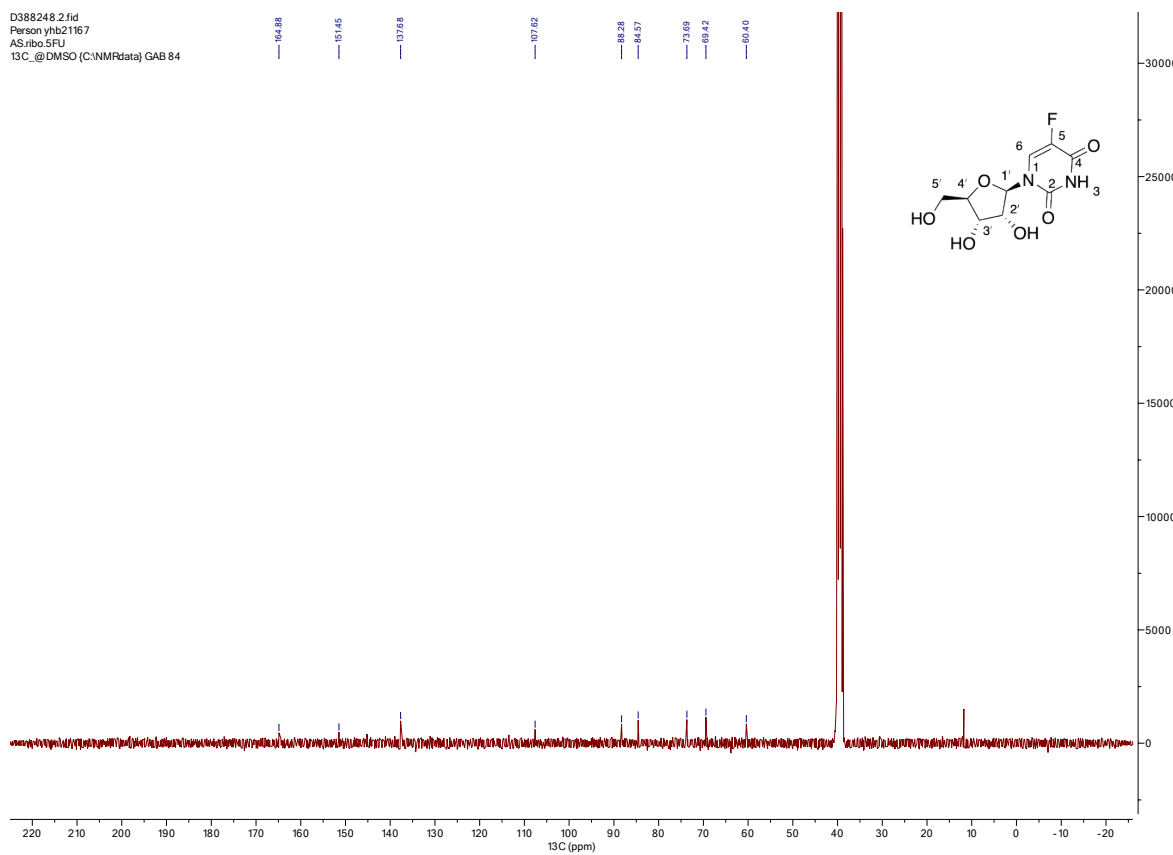

D392558.1.fid  
Person yhb21167  
AS.SFU.Ribo  
@19F DMSO (D:\NMRdata) GAB 1

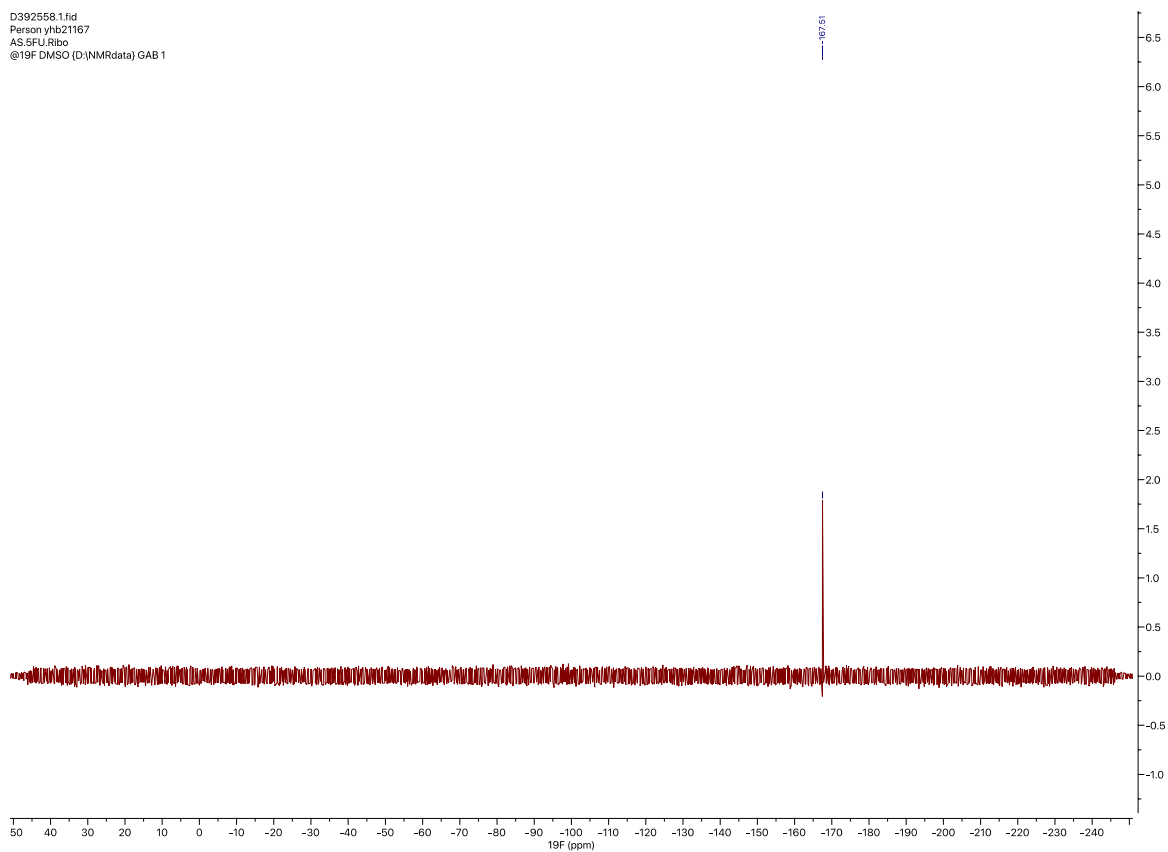

Figure S61 – <sup>19</sup>F NMR of compound 19.

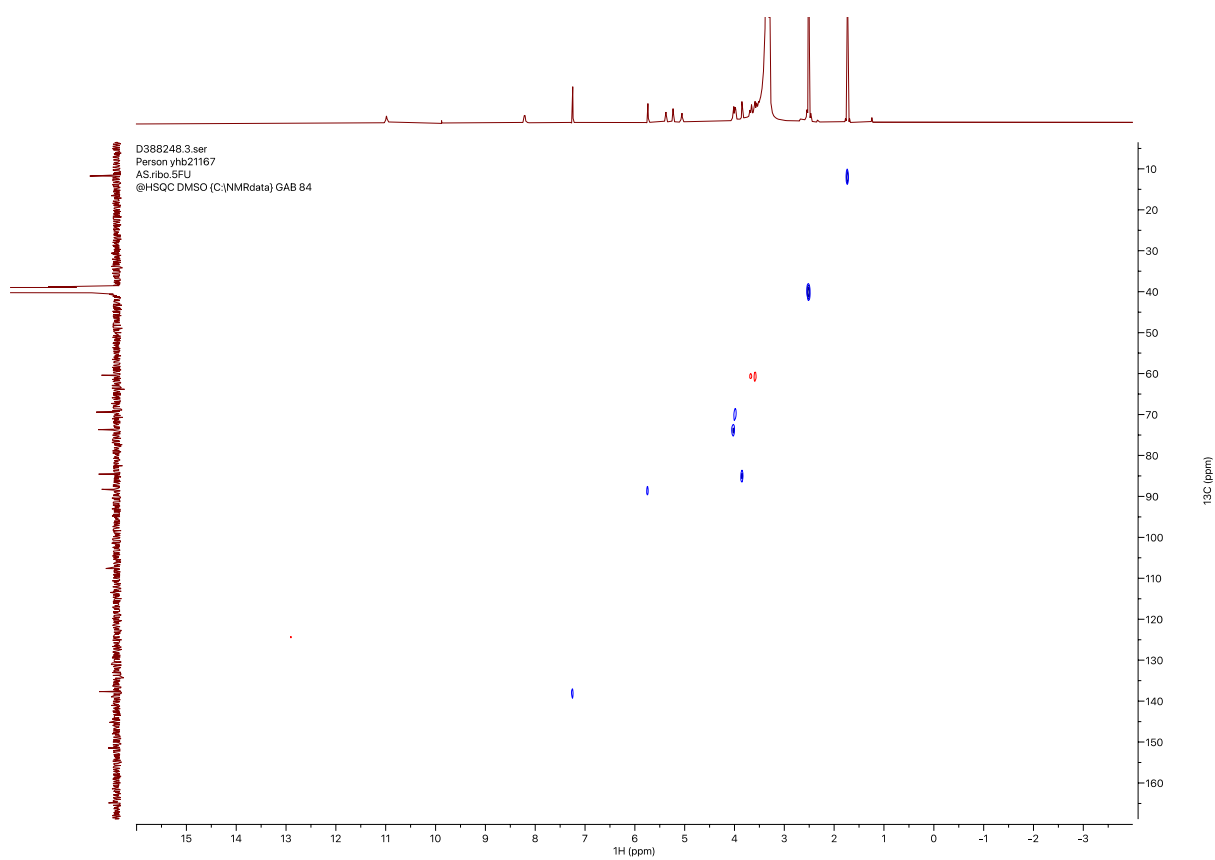

Figure S62 – HSQC NMR of compound 19.



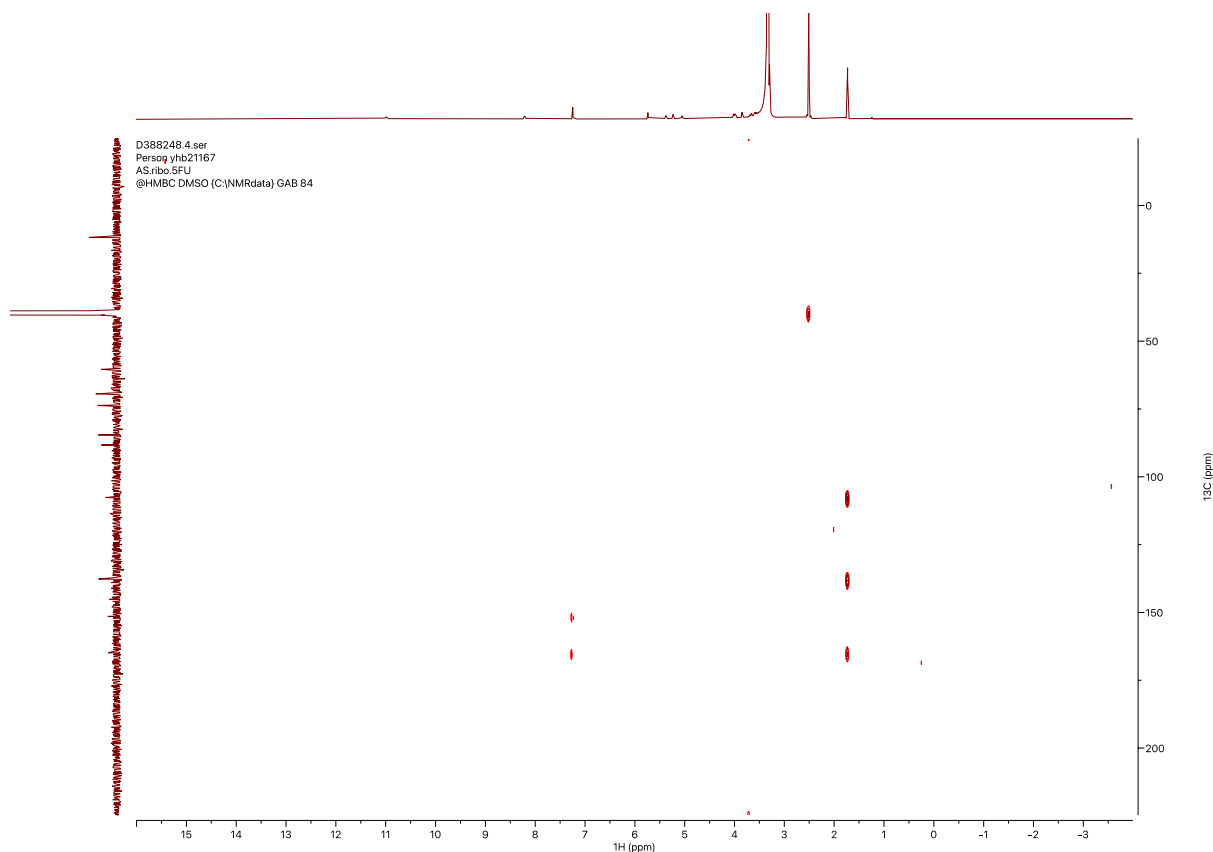

Figure S63 – HMBC of compound 19.

|                  |                             |              |            |
|------------------|-----------------------------|--------------|------------|
| Sample Name      | : 5fu                       | Sample Type  | : Unknown  |
| Sample ID        | :                           | Acquired by  | : Shimadzu |
| Data Filename    | : runs_25032024_009.lcd     | Processed by | : Shimadzu |
| Method Filename  | : Admir Trans glyco Run.lcm |              |            |
| Batch Filename   | : runs.lcb                  |              |            |
| Vial #           | : 1-69                      |              |            |
| Injection Volume | : 10 uL                     |              |            |
| Date Acquired    | : 25/03/2024 12:33:44       |              |            |
| Date Processed   | : 25/03/2024 12:45:05       |              |            |

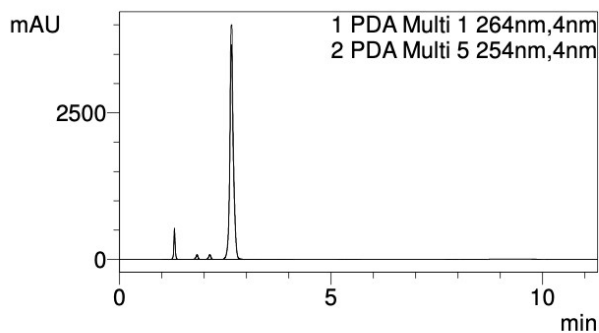

| Peak# | Ret. Time | Area     | Height  | ID# |
|-------|-----------|----------|---------|-----|
| 1     | 1.101     | 2527     | 1008    |     |
| 2     | 1.301     | 1272519  | 526964  |     |
| 3     | 1.573     | 11251    | 3081    |     |
| 4     | 1.834     | 332304   | 86571   |     |
| 5     | 2.137     | 347871   | 83057   |     |
| 6     | 2.649     | 24597207 | 3999476 |     |
| 7     | 3.291     | 8911     | 2381    |     |
| 8     | 3.828     | 1258     | 340     |     |
| 9     | 5.315     | 14013    | 3638    |     |
| 10    | 5.521     | 6969     | 1557    |     |
| 11    | 7.740     | 6092     | 3309    |     |
| 12    | 8.131     | 1542     | 500     |     |
| 13    | 8.238     | 1498     | 363     |     |
| 14    | 8.406     | 2973     | 1285    |     |
| 15    | 8.643     | 3251     | 330     |     |
| 16    | 9.835     | 4439     | 1133    |     |
| Total |           | 26614625 | 4714993 |     |

Figure S64 – HPLC trace of the reaction forming compound 19.

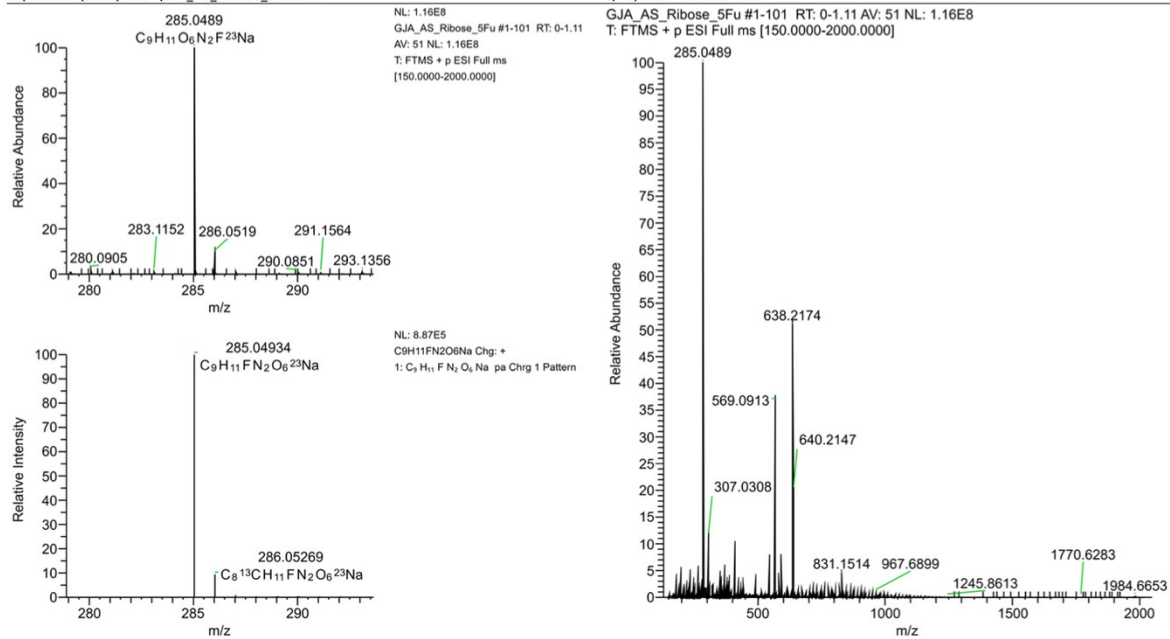

| Peak Mass | Display For...                                                                  | S Fit                | RDB   | Delta (ppm) | Theo. mass | Rank | Combined S... | # Matched I... | # Missed Iso. | MS Cov. [%] | Pattern Cov... | MSMS Matc... |
|-----------|---------------------------------------------------------------------------------|----------------------|-------|-------------|------------|------|---------------|----------------|---------------|-------------|----------------|--------------|
| 285.0489  | C <sub>9</sub> H <sub>11</sub> O <sub>6</sub> N <sub>2</sub> F <sup>23</sup> Na | 38.50499899<br>38708 | 4.50  | -1.54       | 285.04934  | 1    | 94.44         | 4              | 0             | 97.54       | 99.89          | (Collection) |
| 285.0489  | C <sub>8</sub> H <sub>12</sub> O <sub>9</sub> NF                                | 27.19684207<br>39867 | 3.00  | -0.58       | 285.04906  | 2    | 92.7          | 4              | 0             | 96.33       | 98.05          | (Collection) |
| 285.0489  | C <sub>10</sub> H <sub>5</sub> O <sub>3</sub> N <sub>8</sub>                    | 22.52875726<br>50977 | 12.50 | 3.45        | 285.04791  | 3    | 92.45         | 3              | 1             | 96.33       | 96.57          | (Collection) |
| 285.0489  | C <sub>8</sub> H <sub>5</sub> ON <sub>8</sub> F <sup>23</sup> Na                | 19.07578306<br>5629  | 10.00 | -1.53       | 285.04933  | 4    | 92.27         | 2              | 3             | 96.33       | 96.35          | (Collection) |

Figure S65 – HRMS of compound 19.

## 5-fluorocytidine (23)

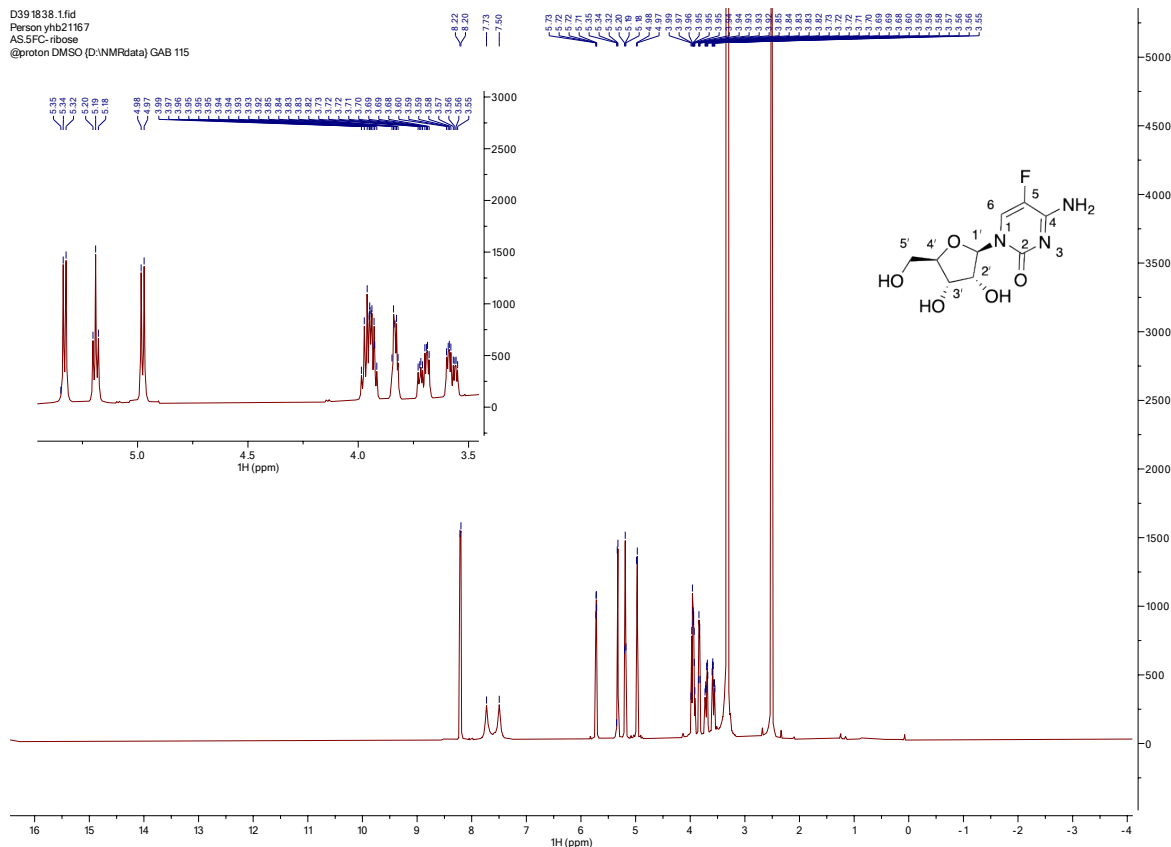Figure S66 – <sup>1</sup>H NMR of compound 23.

D391838.2.fid  
Person yhb21167  
AS.5FC-ribose  
13C\_@DMSO (D:\NMR\data) GAB 115

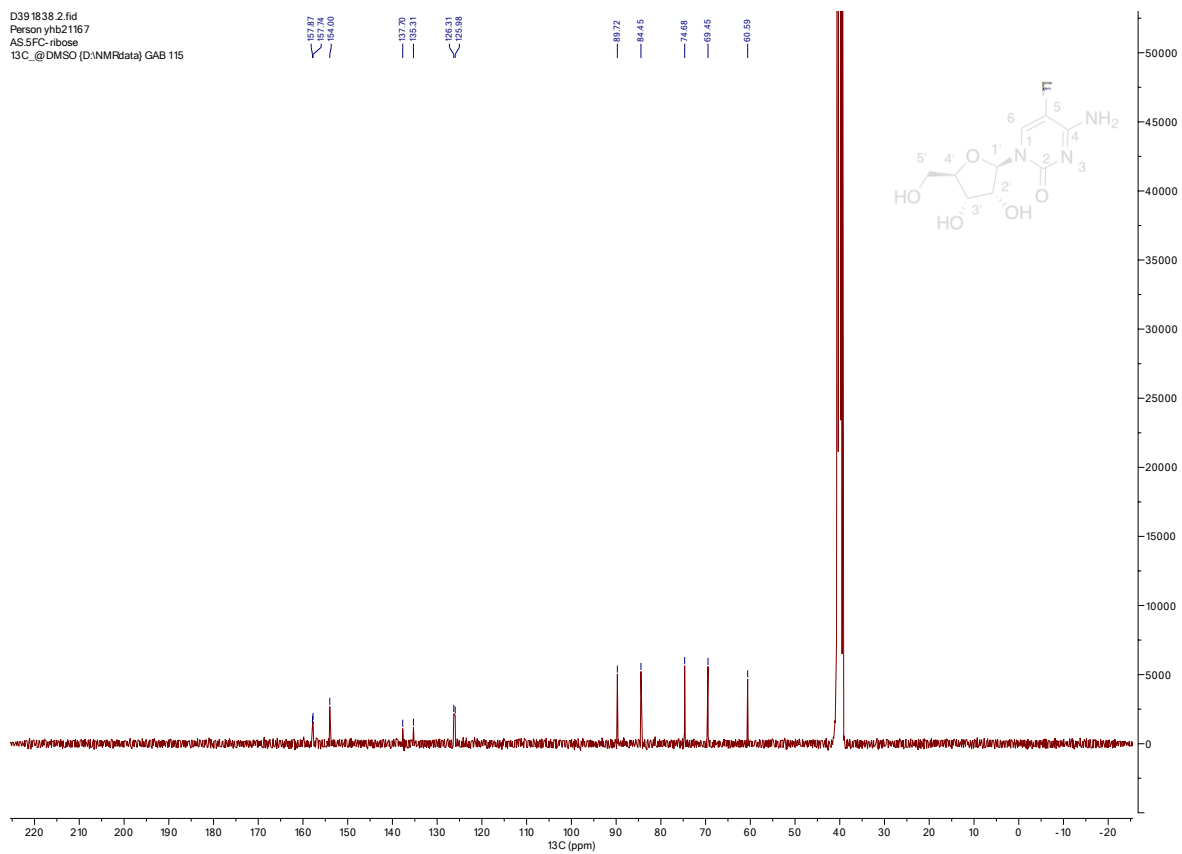

E80235.6.fid  
Person yhb21167  
AS.5FC-5min

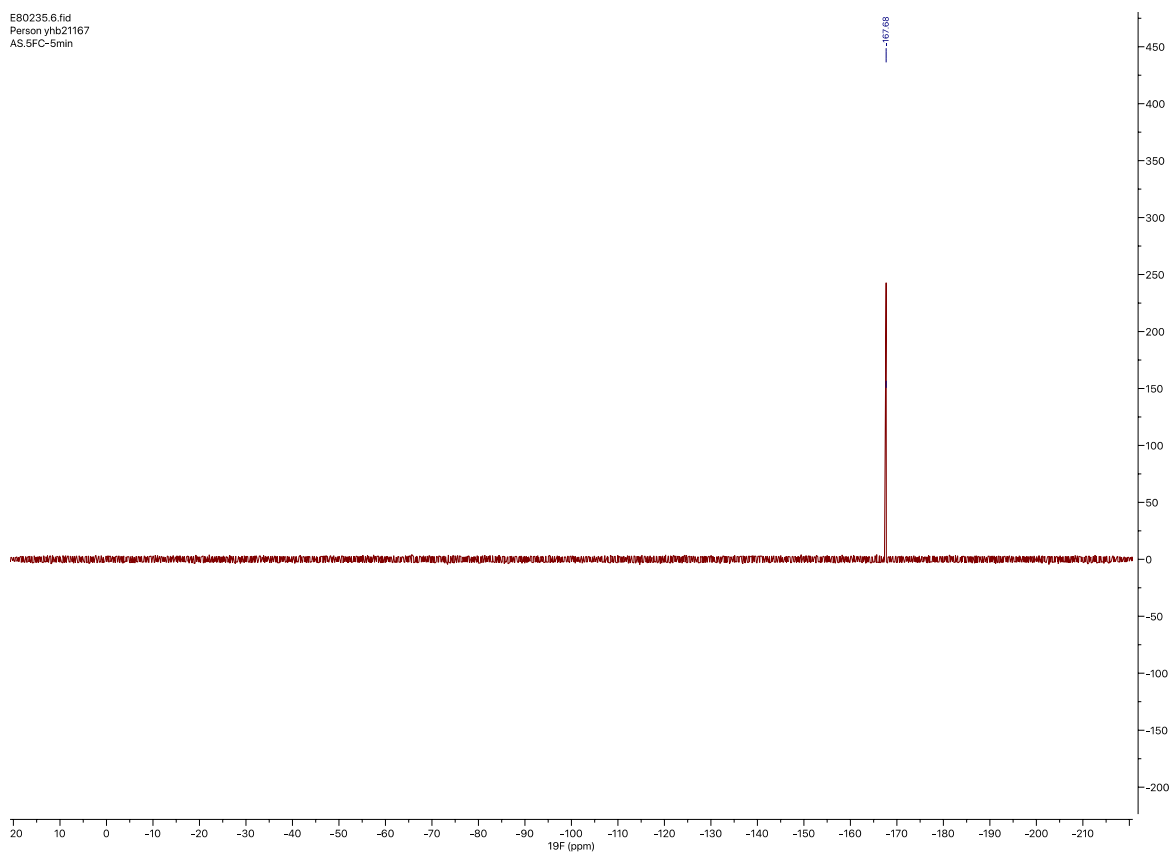

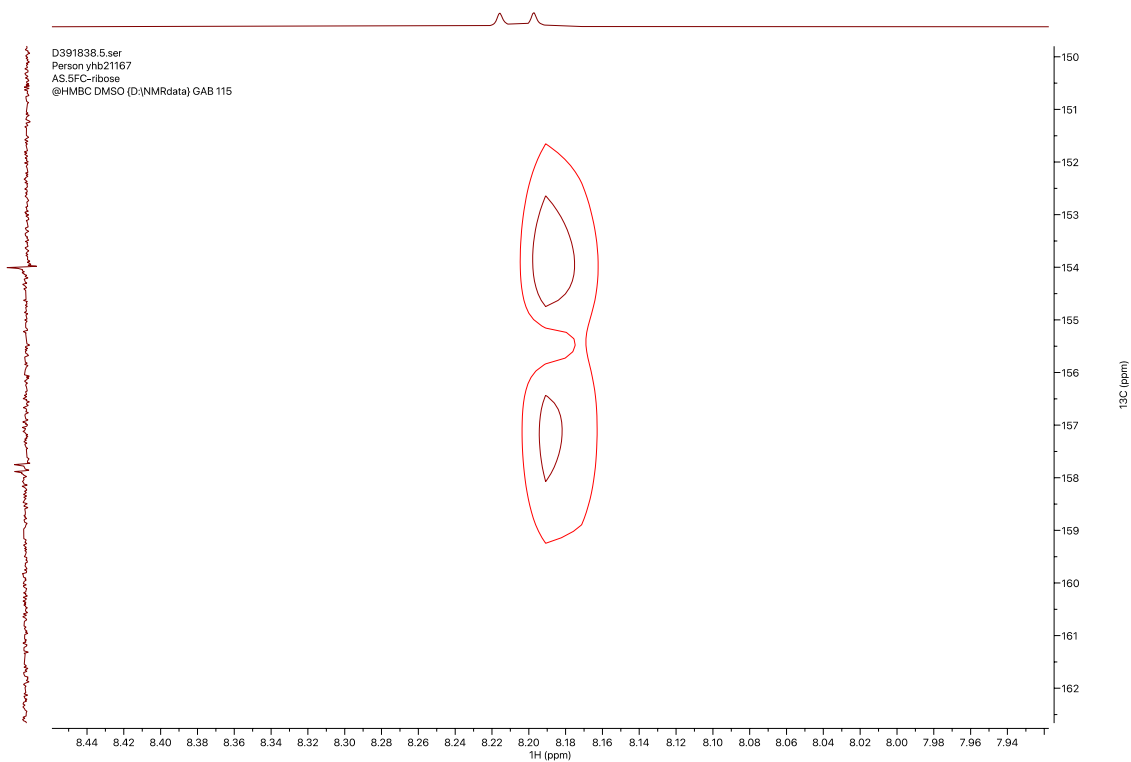

Figure S69 – HMBC cross peak from C6H showing C2 and C4 of compound 23.

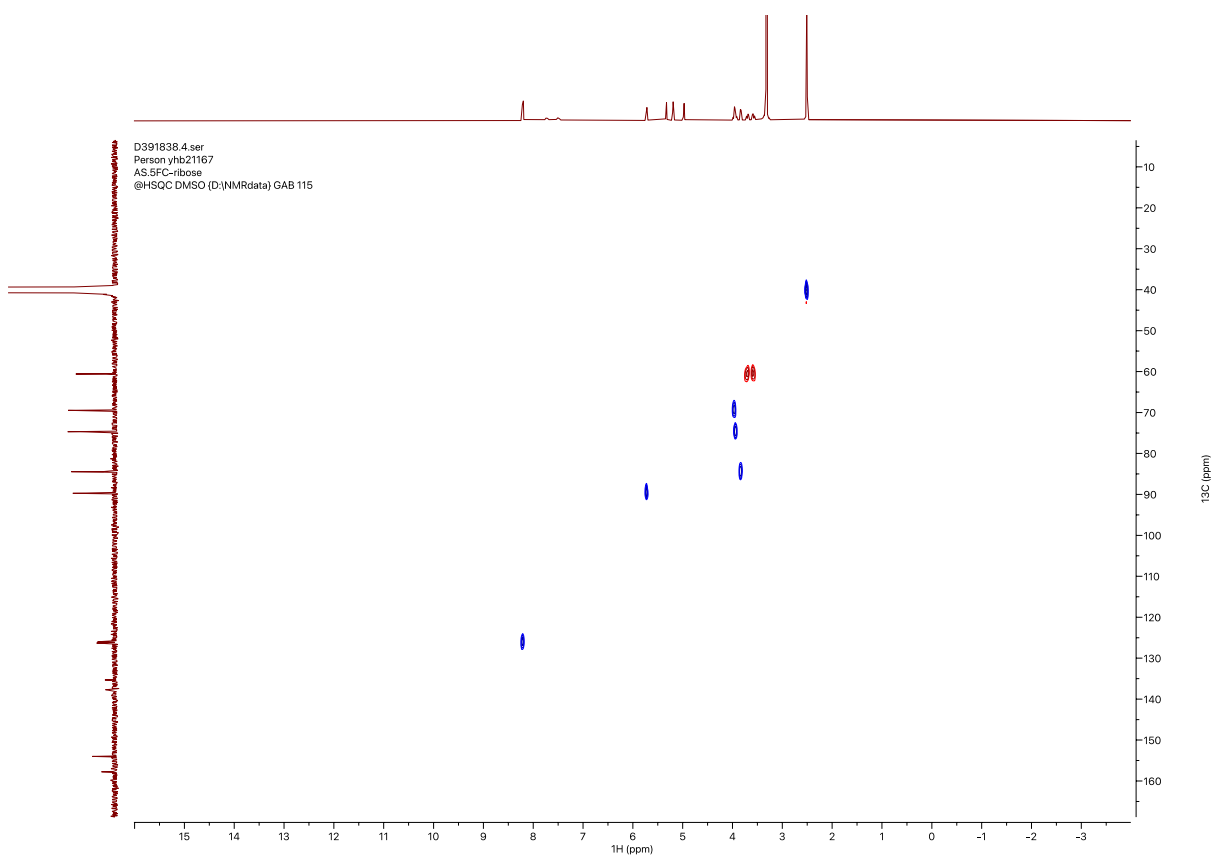

Figure S70 – HSQC of compound 23.

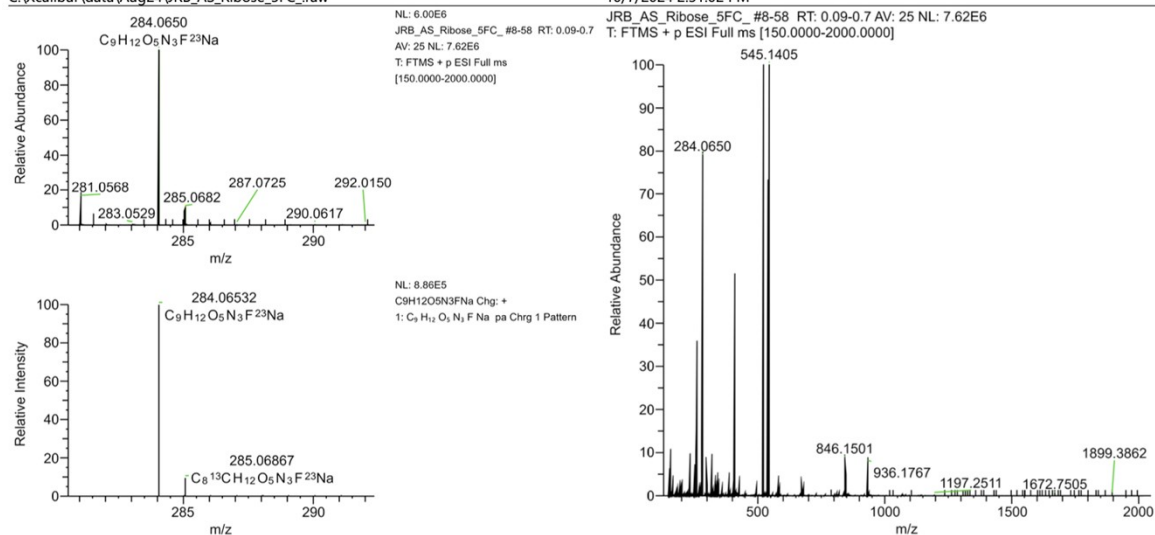

| Peak Mass | Display For...                                                                                 | S Fit                | RDB   | Delta [ppm] | Theo. mass | Rank | Combined S... | # Matched I... | # Missed Iso. | MS Cov. [%] | Pattern Cov... | MSMS Matc... |
|-----------|------------------------------------------------------------------------------------------------|----------------------|-------|-------------|------------|------|---------------|----------------|---------------|-------------|----------------|--------------|
| 284.0650  | C <sub>9</sub> H <sub>12</sub> O <sub>5</sub> N <sub>3</sub> F <sup>23</sup> Na                | 65.04613584<br>56206 | 4.50  | -1.28       | 284.06532  | 1    | 97.46         | 4              | 0             | 99.26       | 100            | (Collection) |
| 284.0650  | C <sub>8</sub> H <sub>13</sub> O <sub>8</sub> N <sub>2</sub> F                                 | 43.62045005<br>77607 | 3.00  | -0.31       | 284.06504  | 2    | 95.38         | 4              | 0             | 98.26       | 98.37          | (Collection) |
| 284.0650  | C <sub>7</sub> H <sub>7</sub> O <sub>3</sub> N <sub>9</sub> F                                  | 22.56971565<br>94378 | 8.50  | -0.29       | 284.06504  | 3    | 94.18         | 3              | 1             | 98.15       | 96.32          | (Collection) |
| 284.0650  | C <sub>8</sub> H <sub>6</sub> N <sub>10</sub> F <sup>23</sup> Na                               | 20.29902118<br>76009 | 10.00 | -1.26       | 284.06531  | 4    | 94.06         | 2              | 3             | 98.15       | 96.12          | (Collection) |
| 284.0650  | C <sub>10</sub> H <sub>6</sub> O <sub>2</sub> N <sub>9</sub>                                   | 20.26493175<br>95876 | 12.50 | 3.73        | 284.06390  | 5    | 94.05         | 3              | 1             | 98.15       | 96.4           | (Collection) |
| 284.0650  | C <sub>11</sub> H <sub>12</sub> O <sub>7</sub> N <sub>2</sub>                                  | 18.03766571<br>10187 | 7.00  | 3.72        | 284.06390  | 6    | 93.94         | 4              | 0             | 98.15       | 98.28          | (Collection) |
| 284.0650  | C <sub>7</sub> H <sub>10</sub> O <sub>4</sub> N <sub>6</sub> F <sup>2</sup><br><sup>3</sup> Na | 21.04712613<br>38303 | 5.00  | 3.45        | 284.06398  | 7    | 86.8          | 3              | 1             | 90.46       | 90.99          | (Collection) |

Figure S71 – HRMS of compound 23.

Sample Name : 5fc  
 Sample ID :  
 Data Filename : runs\_25032024\_012.lcd  
 Method Filename : Admir Trans glyco Run.lcm  
 Batch Filename : runs.lcb  
 Vial # : 1-72  
 Injection Volume : 10 uL  
 Date Acquired : 25/03/2024 13:09:09  
 Date Processed : 25/03/2024 13:20:29

Sample Type : Unknown  
 Acquired by : Shimadzu  
 Processed by : Shimadzu

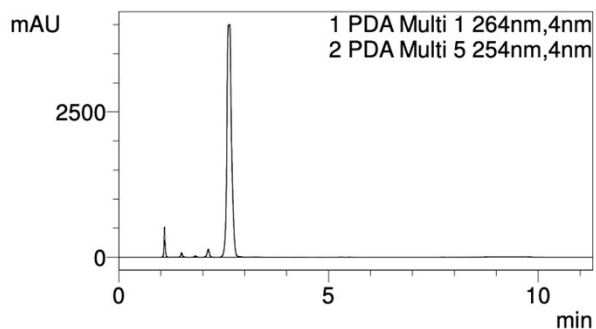

| PDA Ch1 264nm |           |          |         |     |
|---------------|-----------|----------|---------|-----|
| Peak#         | Ret. Time | Area     | Height  | ID# |
| 1             | 1.090     | 1147930  | 499388  |     |
| 2             | 1.299     | 14404    | 4984    |     |
| 3             | 1.381     | 10964    | 3719    |     |
| 4             | 1.498     | 261206   | 80238   |     |
| 5             | 1.830     | 94508    | 24687   |     |
| 6             | 2.134     | 581259   | 141964  |     |
| 7             | 2.641     | 33131722 | 3999966 |     |
| 8             | 3.284     | 13193    | 3510    |     |
| 9             | 3.818     | 1625     | 478     |     |
| 10            | 4.332     | 1224     | 307     |     |
| 11            | 4.852     | 1056     | 211     |     |
| 12            | 5.306     | 20654    | 5386    |     |
| 13            | 5.510     | 9762     | 2194    |     |
| 14            | 7.698     | 7660     | 3574    |     |
| 15            | 7.773     | 1524     | 668     |     |
| 16            | 8.126     | 1712     | 454     |     |
| 17            | 8.236     | 1625     | 383     |     |
| 18            | 8.403     | 3183     | 1271    |     |
| 19            | 8.638     | 3568     | 434     |     |
| 20            | 8.758     | 1454     | 251     |     |
| 21            | 9.829     | 3579     | 1217    |     |
| Total         |           | 35313811 | 4775284 |     |

Figure S72 – HPLC trace of the reaction to form compound 23.

### 5-methylcytosine (24)

D387982.1.fid  
Person yhb21167  
AS.Fibo.5meC  
@proton DMSO (C:\NMR\data) GAB 101

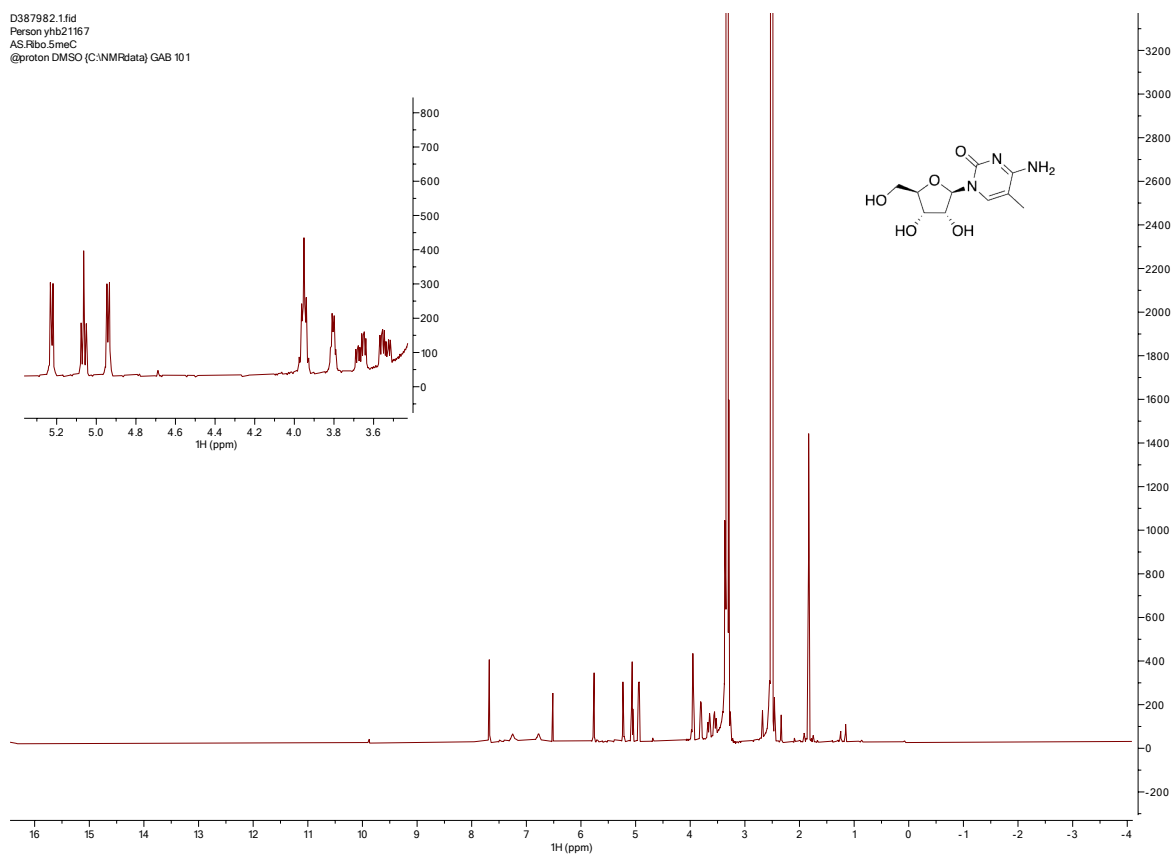

Figure S73 – 1H NMR of compound 24.

D3921112.fid  
Person YHB21167  
as.5meC.rbo  
13C\_@DMSO (D:\NMR\data) GAB 111

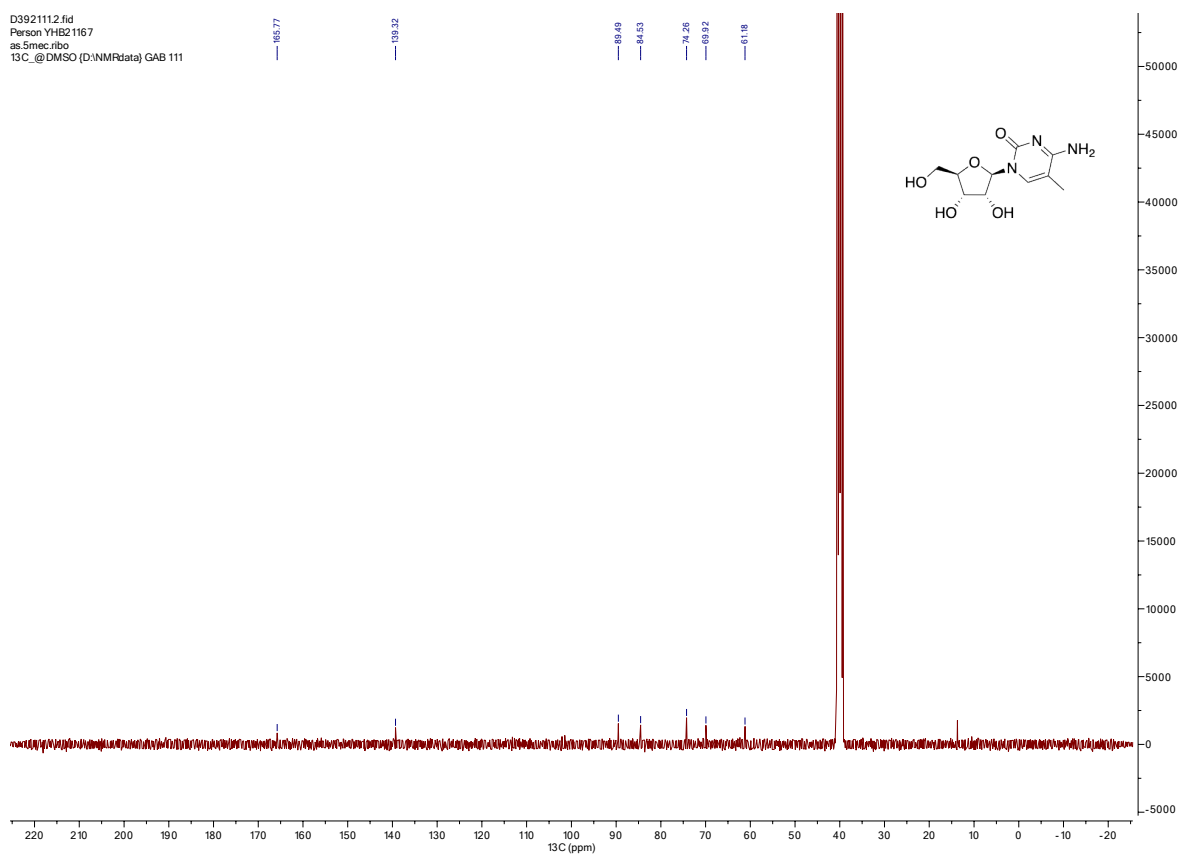

Figure S74 – 13C NMR of compound 24

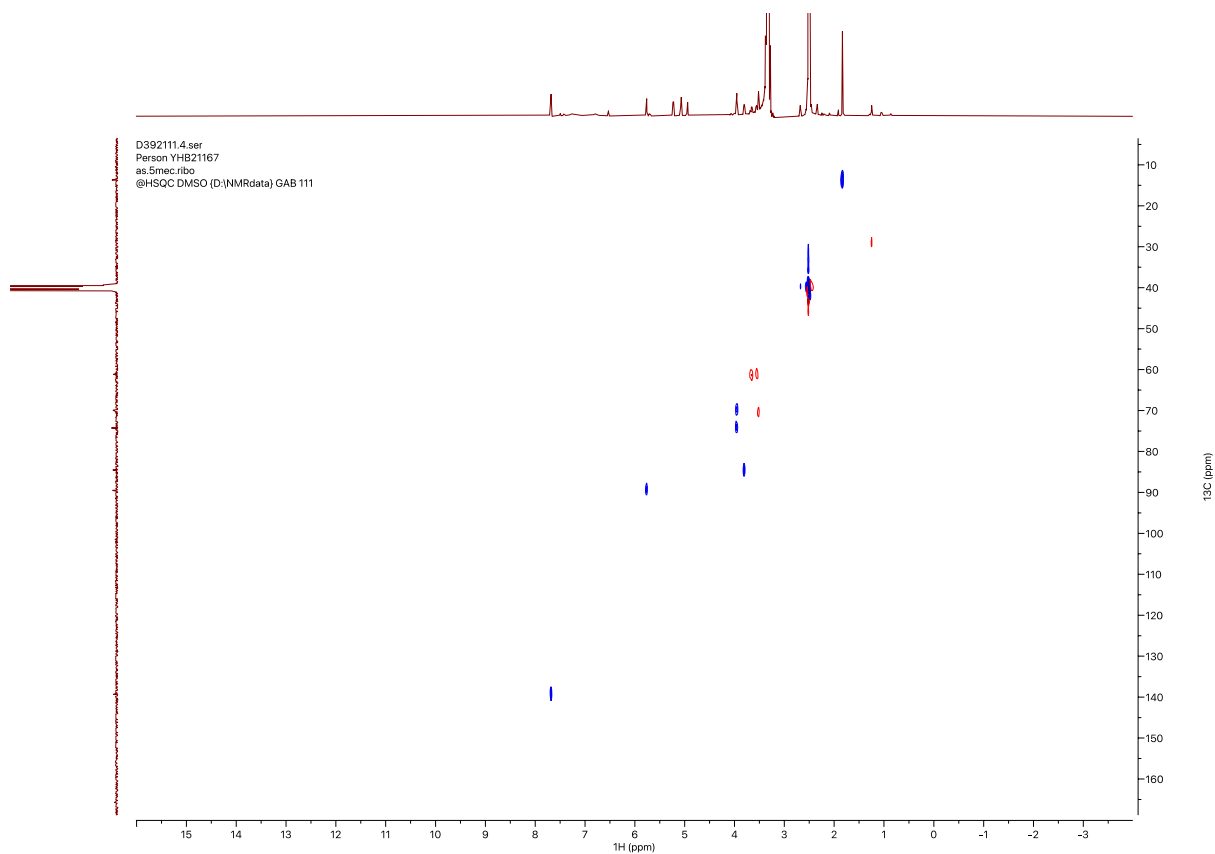

Figure S75 – HSQC NMR of compound 24

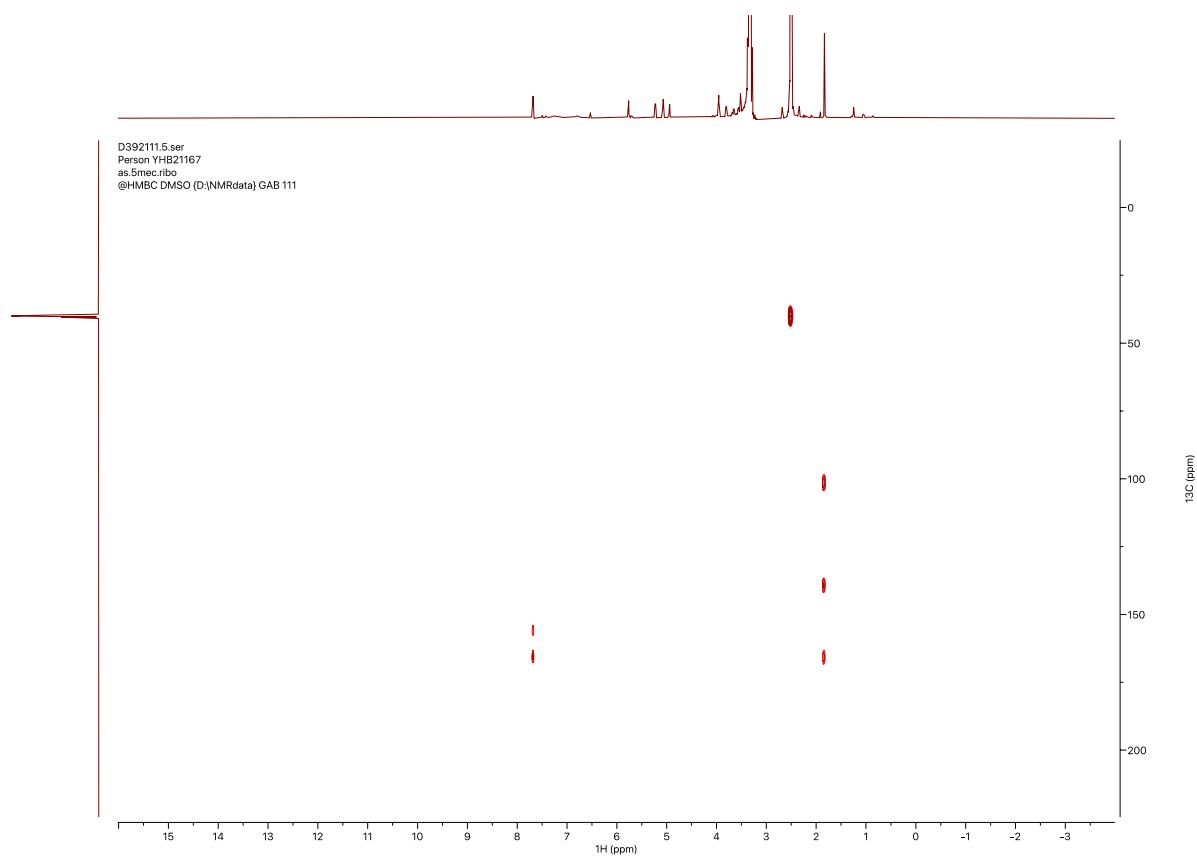

Figure S76 – HMBC of compound 24



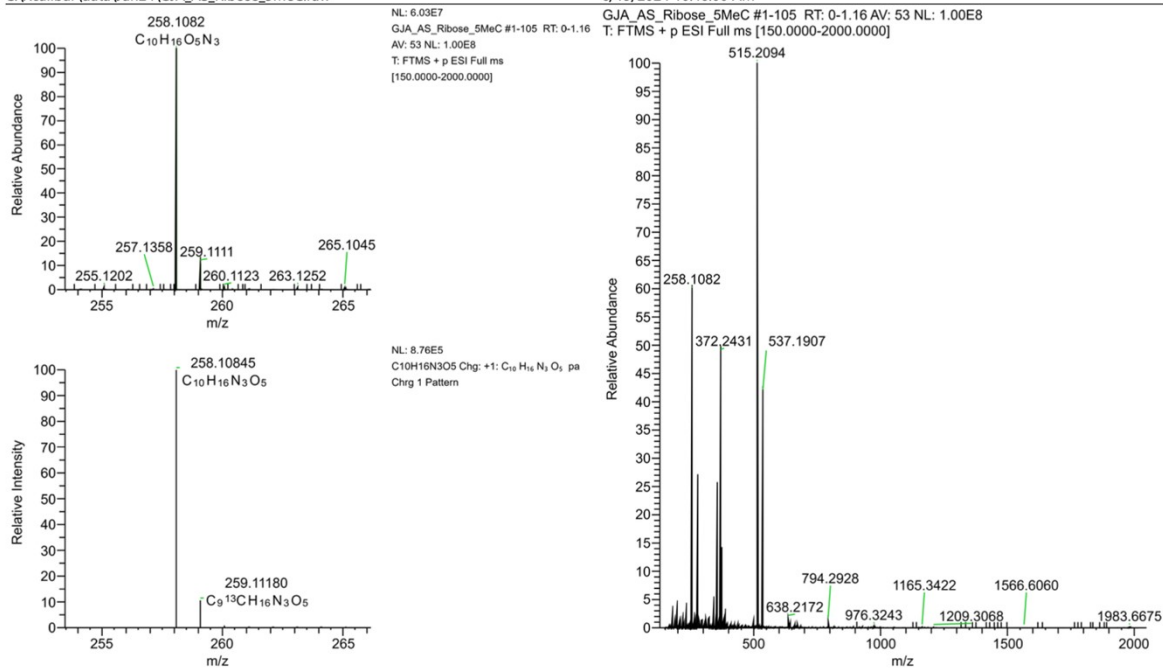

| Peak Mass | Display For...                                                | S Fit                | RDB   | Delta [ppm] | Theo. mass | Rank | Combined S... | # Matched I... | # Missed Iso. | MS Cov. [%] | Pattern Cov... | MSMS Matc... |
|-----------|---------------------------------------------------------------|----------------------|-------|-------------|------------|------|---------------|----------------|---------------|-------------|----------------|--------------|
| 258.1082  | C <sub>10</sub> H <sub>16</sub> O <sub>5</sub> N <sub>3</sub> | 41.42716720<br>88332 | 4.50  | -1.05       | 258.10845  | 1    | 95.38         | 5              | 0             | 98.38       | 99.02          | (Collection) |
| 258.1082  | C <sub>9</sub> H <sub>10</sub> N <sub>10</sub>                | 18.89430870<br>94556 | 10.00 | -1.03       | 258.10844  | 2    | 93.24         | 3              | 2             | 97.37       | 96.08          | (Collection) |
| 258.1082  | C <sub>8</sub> H <sub>14</sub> O <sub>4</sub> N <sub>6</sub>  | 20.34446717<br>34124 | 5.00  | 4.16        | 258.10710  | 3    | 84.82         | 4              | 0             | 88.4        | 90.15          | (Collection) |

Figure S77 – HRMS of compound 24

Sample Name : 5mec  
 Sample ID :  
 Data Filename : runs\_25032024\_015.lcd  
 Method Filename : Admir Trans glyco Run.lcm  
 Batch Filename : runs.lcb  
 Vial # : 1-75  
 Injection Volume : 10 uL  
 Date Acquired : 25/03/2024 13:44:34  
 Date Processed : 25/03/2024 13:55:54

Sample Type : Unknown  
 Acquired by : Shimadzu  
 Processed by : Shimadzu

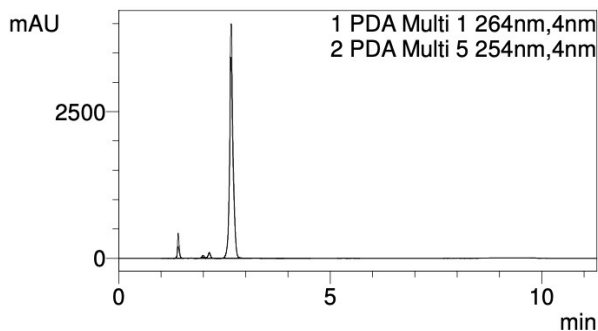

| Peak# | Ret. Time | Area     | Height  | ID# |
|-------|-----------|----------|---------|-----|
| 1     | 1.104     | 1428     | 534     |     |
| 2     | 1.280     | 1687     | 663     |     |
| 3     | 1.408     | 1256485  | 420196  |     |
| 4     | 1.580     | 14131    | 3670    |     |
| 5     | 1.716     | 21834    | 6044    |     |
| 6     | 1.996     | 220504   | 47941   |     |
| 7     | 2.144     | 423138   | 102246  |     |
| 8     | 2.663     | 23397647 | 3993146 |     |
| 9     | 3.298     | 8643     | 2258    |     |
| 10    | 3.833     | 1134     | 308     |     |
| 11    | 5.319     | 13480    | 3449    |     |
| 12    | 5.525     | 6481     | 1407    |     |
| 13    | 7.726     | 6377     | 3509    |     |
| 14    | 8.138     | 1367     | 404     |     |
| 15    | 8.249     | 1302     | 284     |     |
| 16    | 8.419     | 2685     | 1211    |     |
| 17    | 8.656     | 2816     | 338     |     |
| 18    | 9.829     | 4795     | 782     |     |
| Total |           | 25385932 | 4588390 |     |

Figure S78 – HPLC trace of the reaction forming compound 24.

**5-ethynyluridine (21)**

D387825.1.fid  
Person yhb21167  
AS.Ftbose.eu  
@proton DMSO (C:\NMR\data) GAB 100

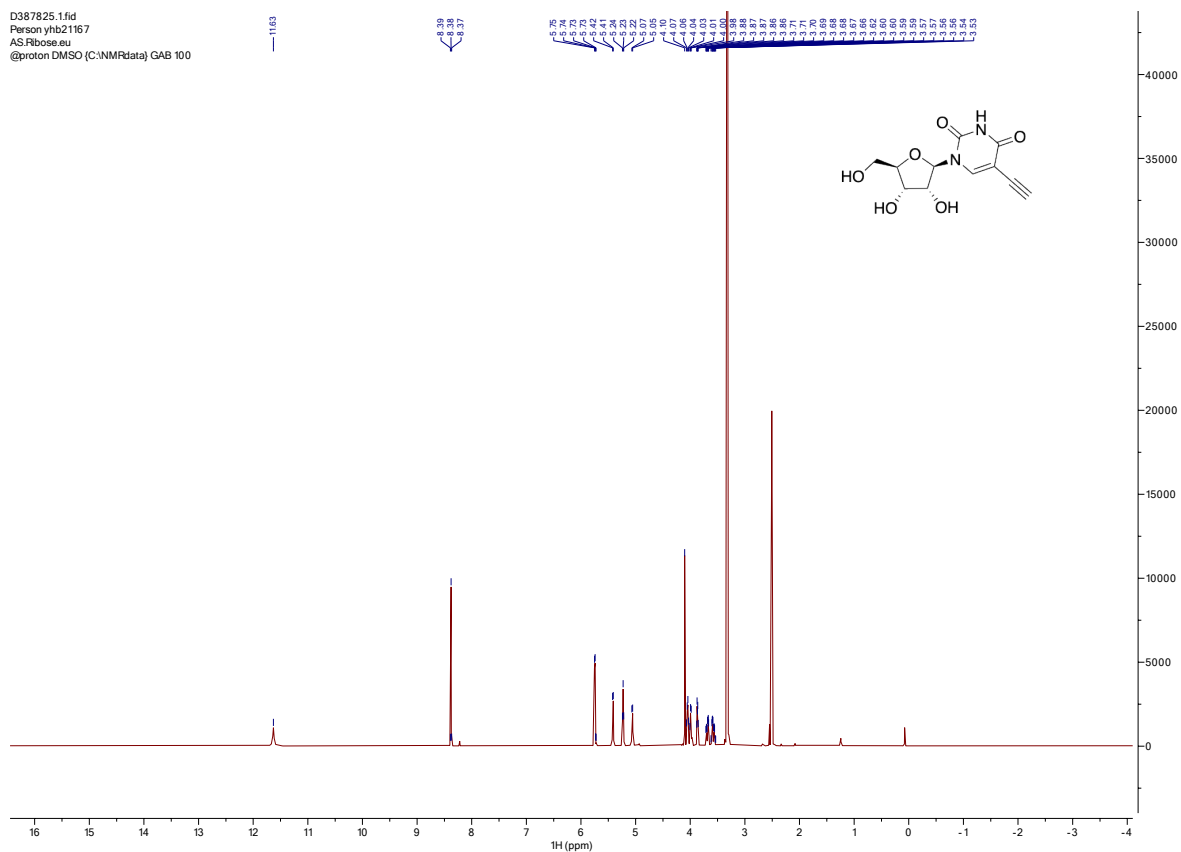

Figure S79 – <sup>1</sup>H NMR of compound 21.

D387825.2.fid  
Person yhb21167  
AS.Ftbose.eu  
13C\_@DMSO (C:\NMR\data) GAB 100

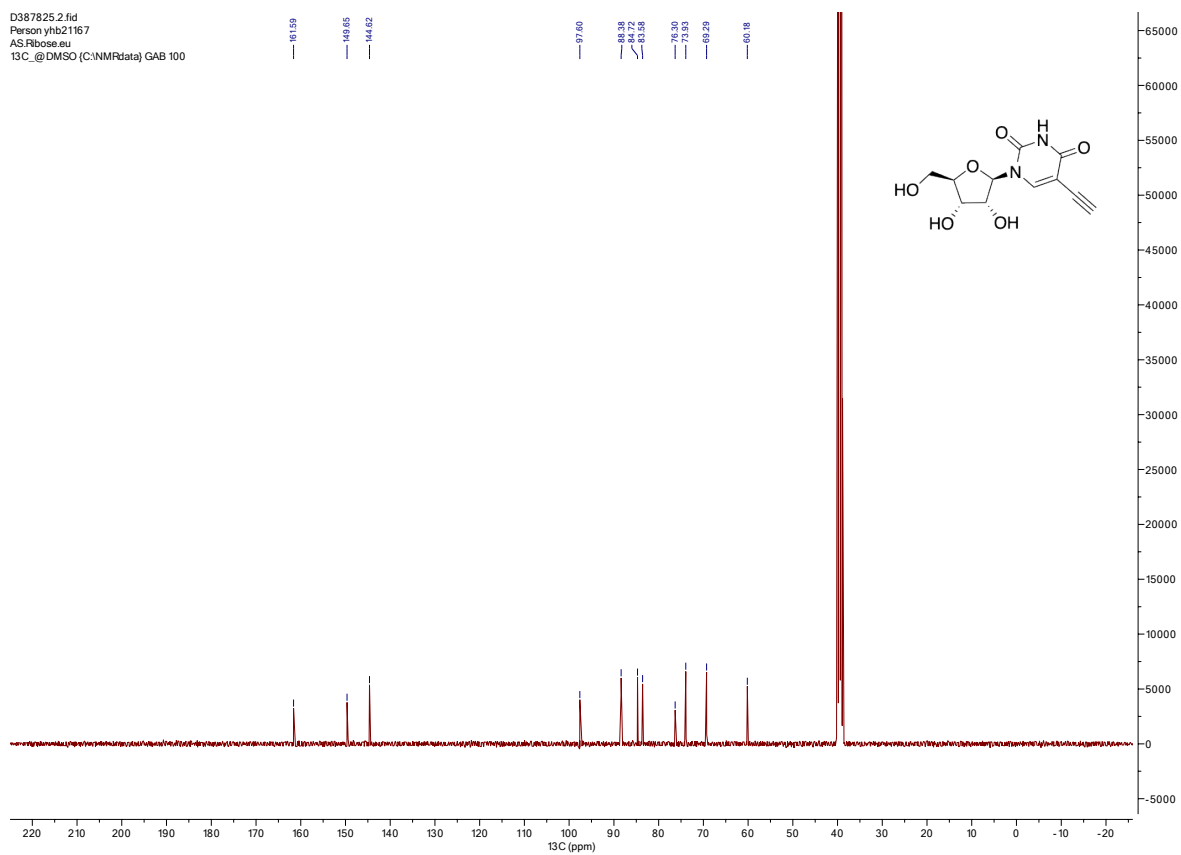

Figure S80 – <sup>13</sup>C NMR of compound 21.

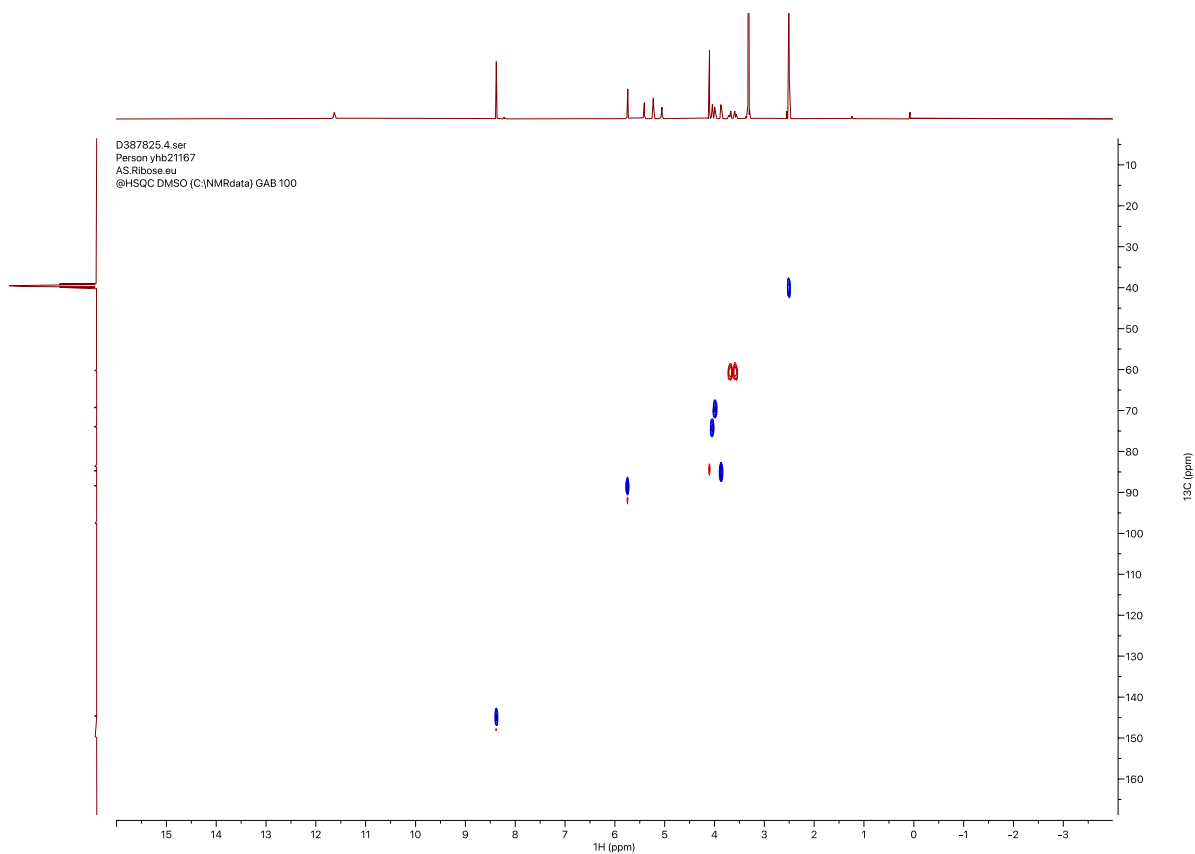

Figure S81 – HSQC of compound 21.

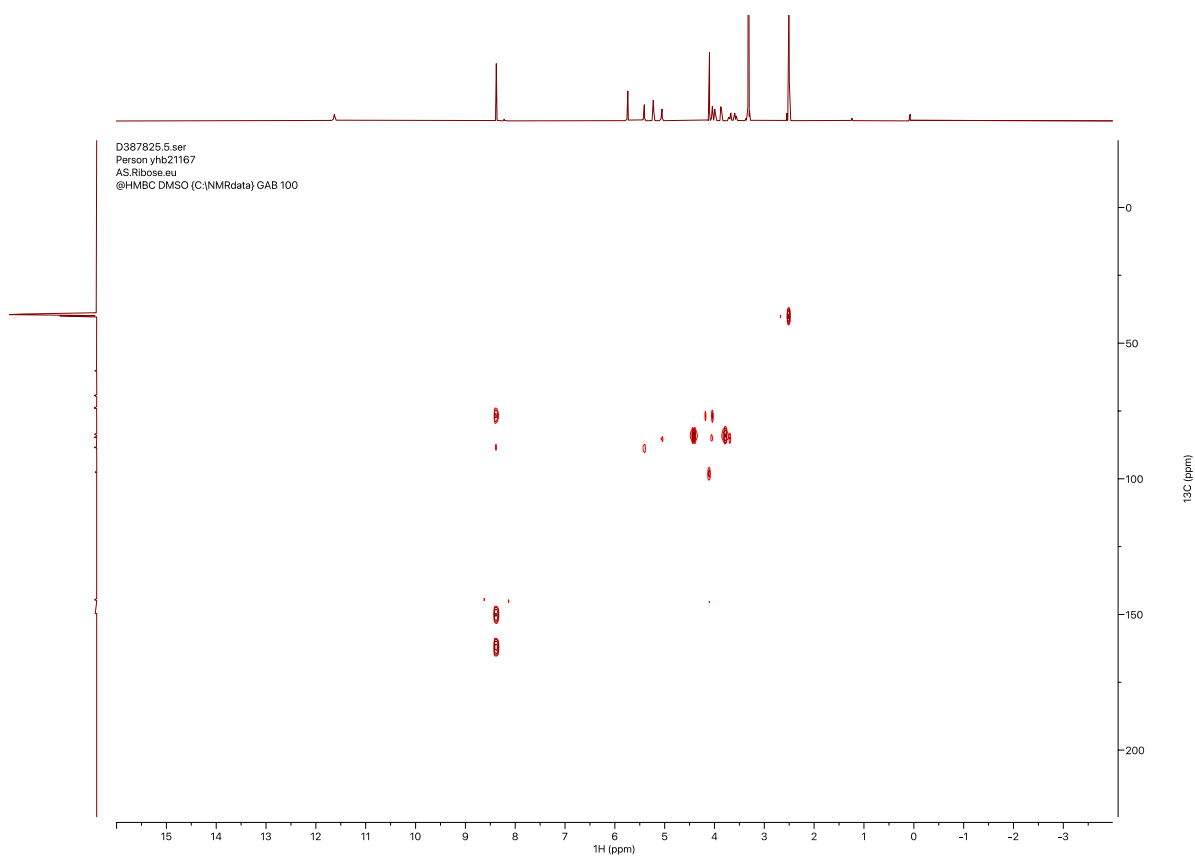

Figure S82- HMBC of compound 21.

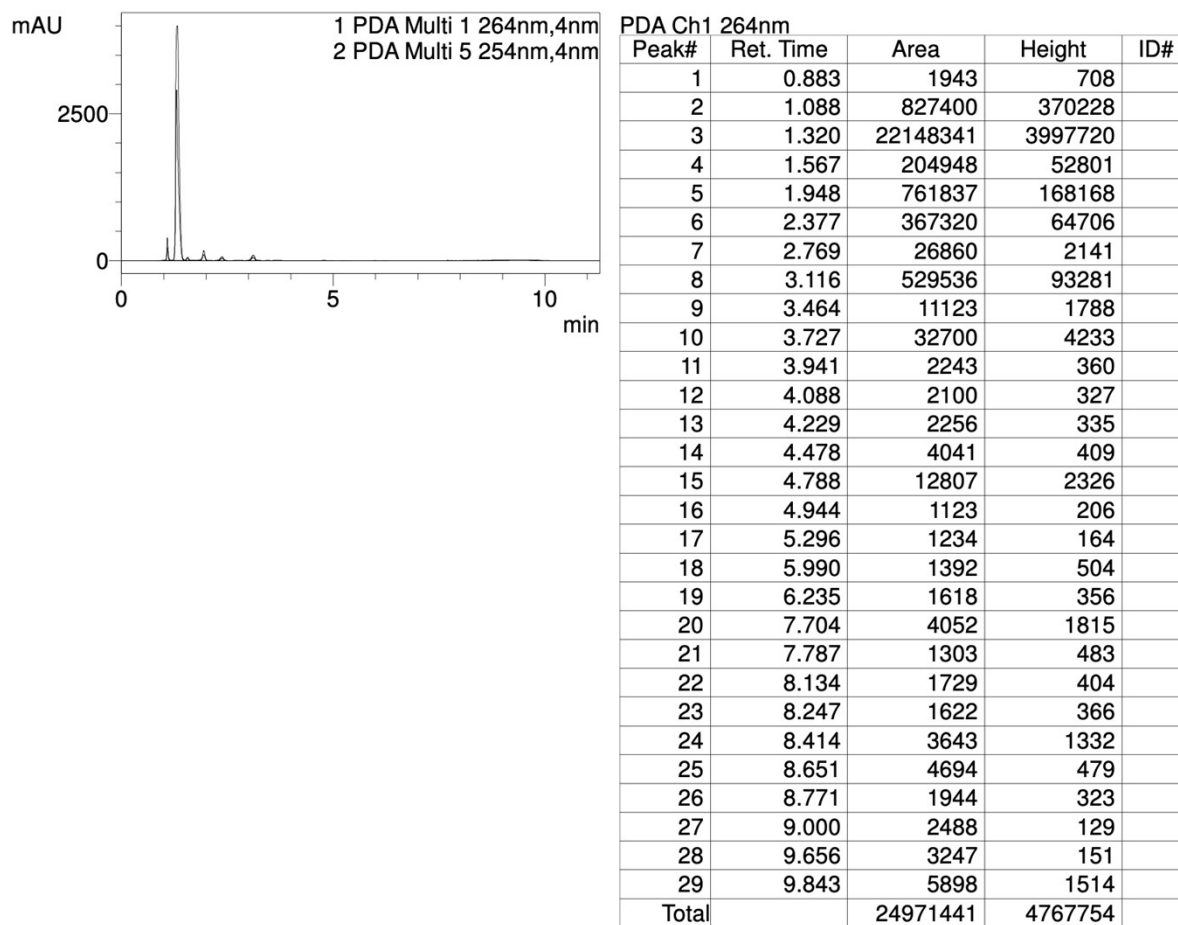

Figure S83 – HPLC trace of the reaction forming compound 21.

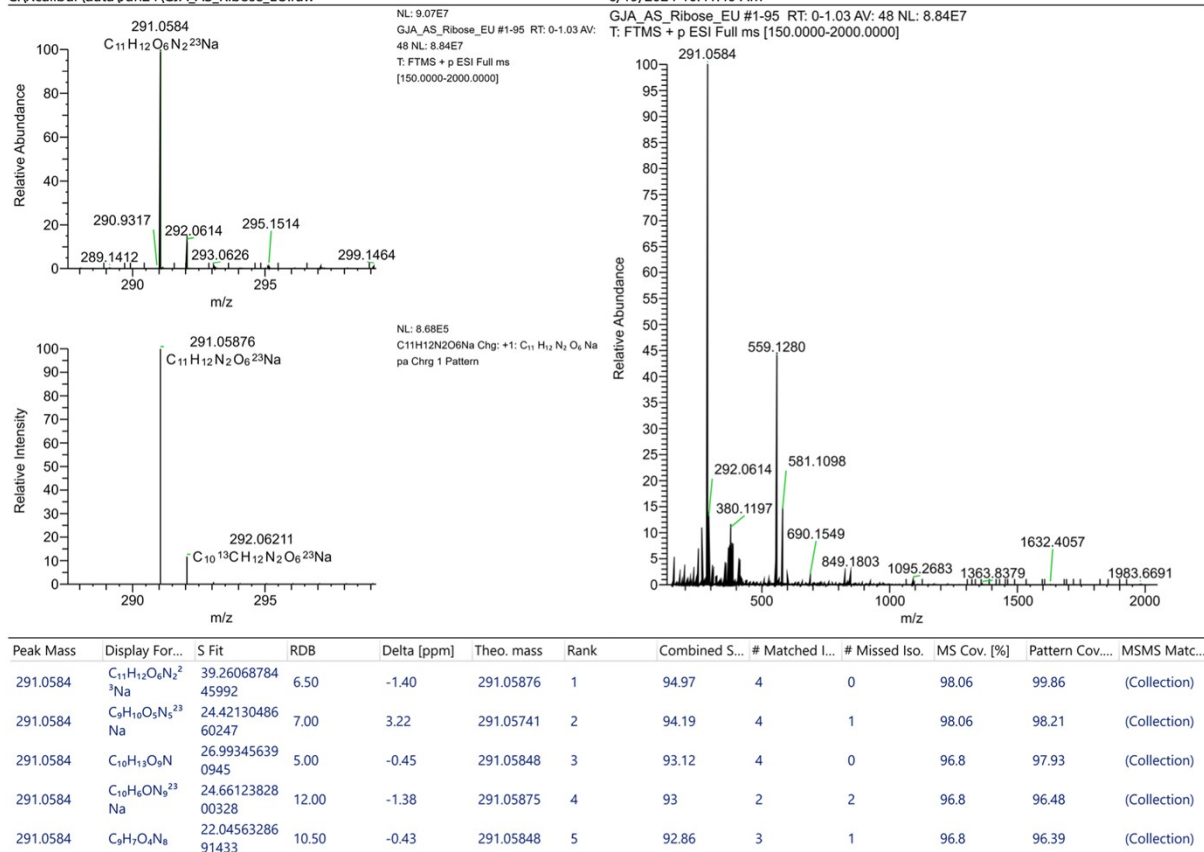

Figure S84 – HRMS trace of compound 21.

**5-azidouridine (22)**



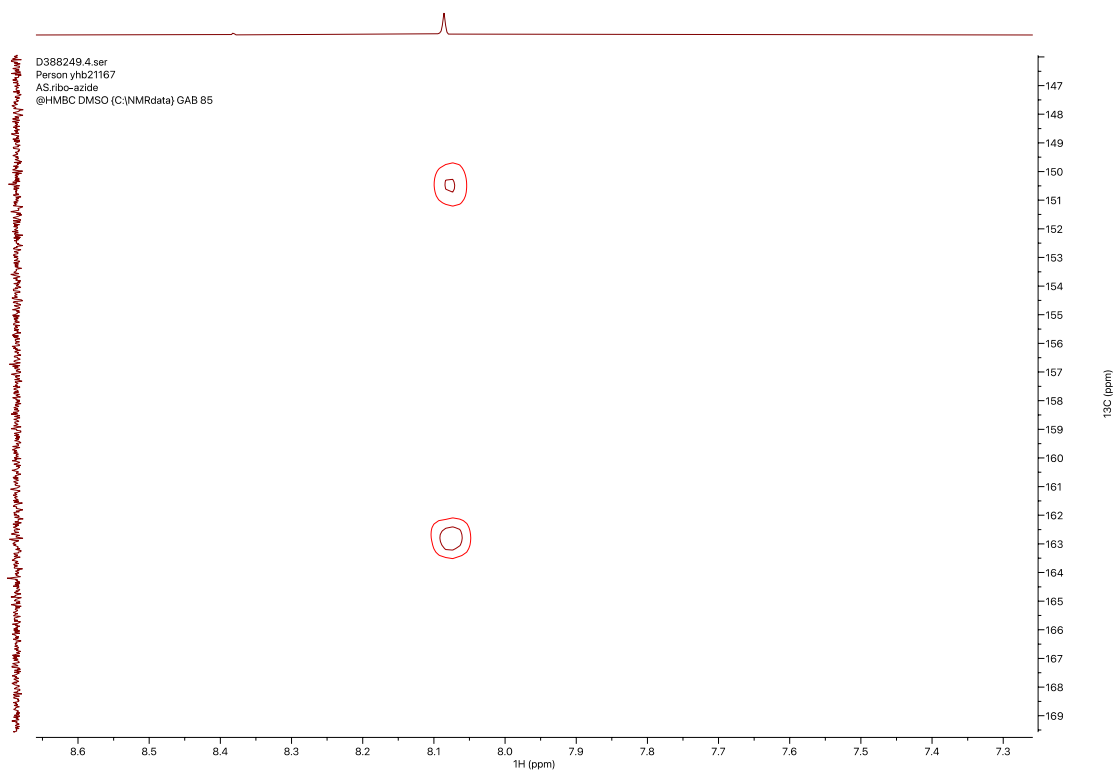

Figure S87 – HMBC of compound 22.

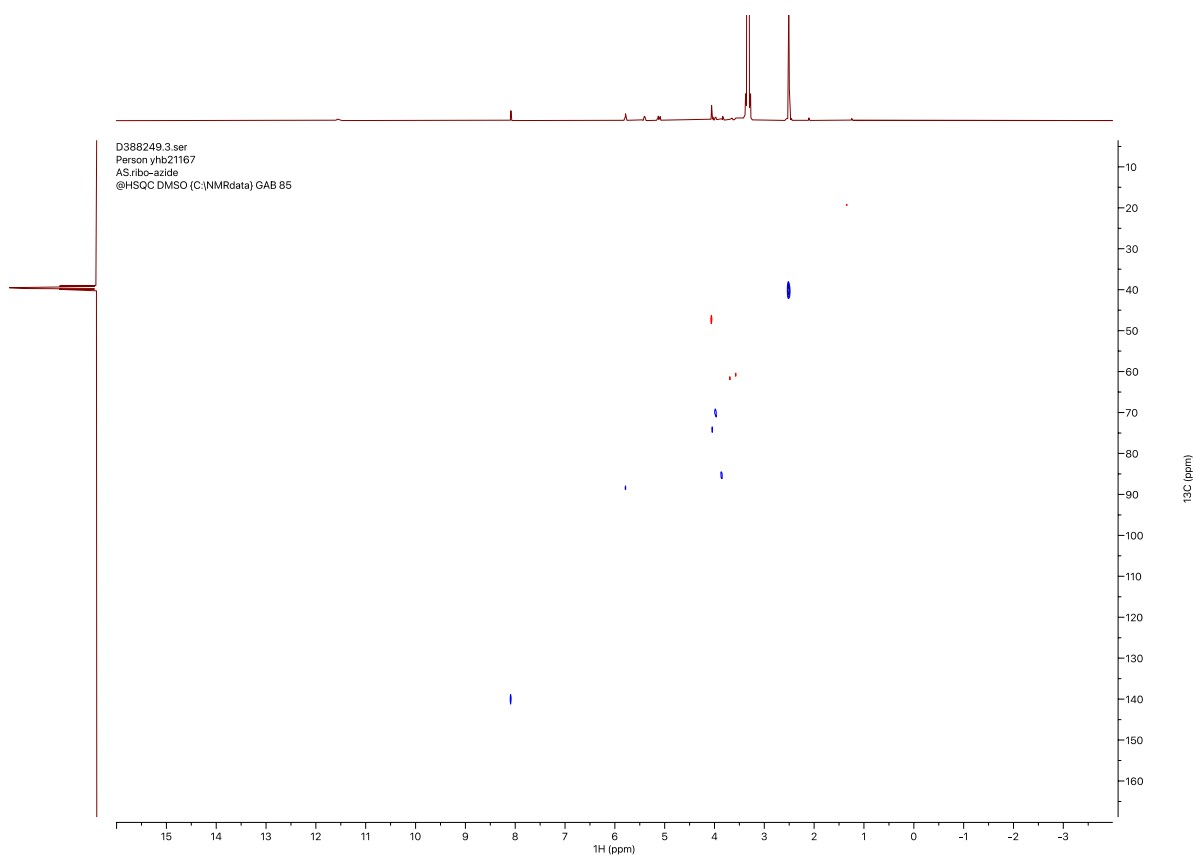

Figure S88 – HSQC of compound 22.

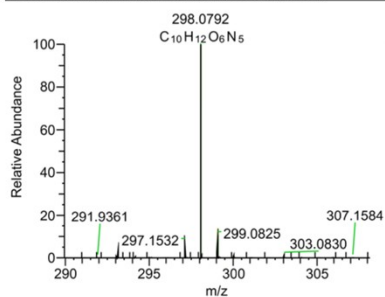

NL: 6.37E6  
GJA\_AS\_Ribose\_Azide #2-76 RT: 0.02-0.85 AV: 38 NL: 6.29E6  
T: FTMS - p ESI Full ms [150.0000-2000.0000]

GJA\_AS\_Ribose\_Azide #2-76 RT: 0.02-0.85 AV: 38 NL: 6.29E6  
T: FTMS - p ESI Full ms [150.0000-2000.0000]

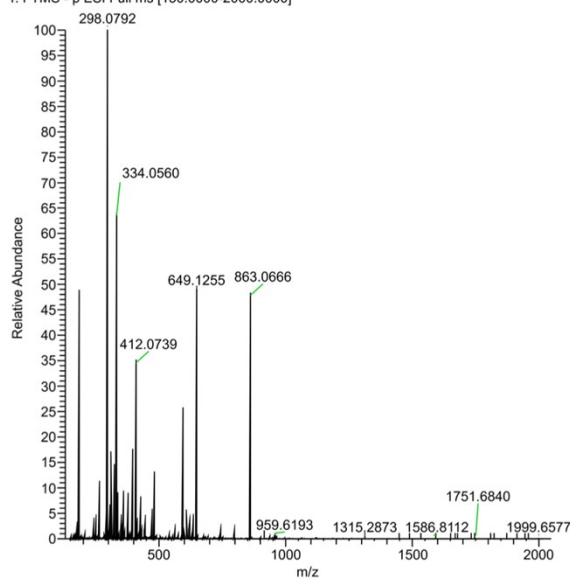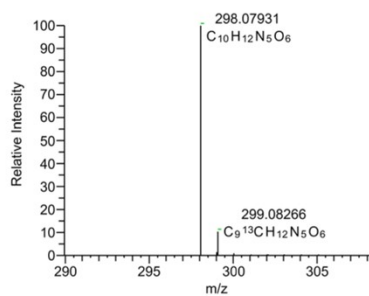

NL: 8.68E5  
C10H12N5O6 Chg: -1: C<sub>10</sub>H<sub>12</sub>N<sub>5</sub>O<sub>6</sub> pa  
Chrg -1 Pattern

| Peak Mass | Display For...                                                | S Fit                | RDB   | Delta [ppm] | Theo. mass | Rank | Combined S... | # Matched I... | # Missed Iso. | MS Cov. [%] | Pattern Cov.... | MSMS Matc... |
|-----------|---------------------------------------------------------------|----------------------|-------|-------------|------------|------|---------------|----------------|---------------|-------------|-----------------|--------------|
| 298.0792  | C <sub>10</sub> H <sub>12</sub> O <sub>6</sub> N <sub>5</sub> | 47.22461246<br>27381 | 7.50  | -0.28       | 298.07931  | 1    | 95.38         | 4              | 0             | 98.05       | 99.87           | (Collection) |
| 298.0792  | C <sub>9</sub> H <sub>16</sub> O <sub>10</sub> N              | 18.31525238<br>88921 | 2.50  | 4.21        | 298.07797  | 2    | 92.72         | 4              | 0             | 96.85       | 97.78           | (Collection) |
| 298.0792  | C <sub>8</sub> H <sub>10</sub> O <sub>5</sub> N <sub>8</sub>  | 17.09239411<br>22925 | 8.00  | 4.22        | 298.07796  | 3    | 84.68         | 3              | 1             | 88.44       | 89.46           | (Collection) |
| 298.0792  | C <sub>11</sub> H <sub>8</sub> O <sub>2</sub> N <sub>9</sub>  | 7.063796035<br>24497 | 12.50 | -4.77       | 298.08064  | 4    | 83.01         | 3              | 1             | 87.23       | 85.93           | (Collection) |
| 298.0792  | C <sub>12</sub> H <sub>14</sub> O <sub>7</sub> N <sub>2</sub> | 7.019139318<br>25121 | 7.00  | -4.79       | 298.08065  | 5    | 83.01         | 4              | 0             | 87.23       | 86.66           | (Collection) |

Figure S89 – HRMS of compound 22.



Sample Name : azide  
 Sample ID :  
 Data Filename : azide\_25032024\_003.lcd  
 Method Filename : Admir Trans glyco Run.lcm  
 Batch Filename : azide.lcb  
 Vial # : 1-93  
 Injection Volume : 10 uL  
 Date Acquired : 25/03/2024 10:47:35  
 Date Processed : 25/03/2024 10:58:55

Sample Type : Unknown  
 Acquired by : Shimadzu  
 Processed by : Shimadzu

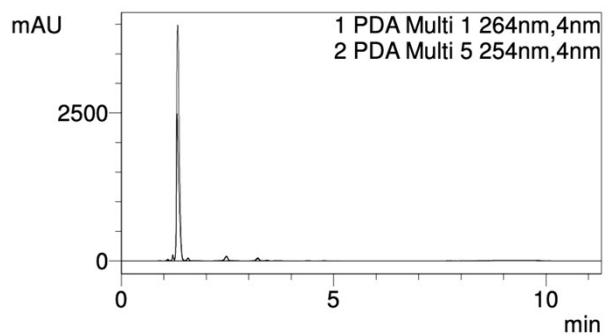

| 1 PDA Multi 1 264nm,4nm |           | PDA Ch1 264nm |         |     |
|-------------------------|-----------|---------------|---------|-----|
| Peak#                   | Ret. Time | Area          | Height  | ID# |
| 1                       | 0.885     | 7941          | 4185    |     |
| 2                       | 1.095     | 78762         | 29834   |     |
| 3                       | 1.215     | 232118        | 98246   |     |
| 4                       | 1.330     | 17453054      | 3947693 |     |
| 5                       | 1.573     | 175743        | 49390   |     |
| 6                       | 1.770     | 20912         | 3754    |     |
| 7                       | 1.896     | 4873          | 545     |     |
| 8                       | 2.475     | 435008        | 78420   |     |
| 9                       | 2.722     | 6794          | 883     |     |
| 10                      | 2.880     | 1560          | 310     |     |
| 11                      | 3.220     | 248620        | 50960   |     |
| 12                      | 3.434     | 43892         | 9431    |     |
| 13                      | 3.631     | 5511          | 1282    |     |
| 14                      | 3.734     | 16456         | 3254    |     |
| 15                      | 4.017     | 1054          | 272     |     |
| 16                      | 4.151     | 2042          | 505     |     |
| 17                      | 4.407     | 11949         | 2673    |     |
| 18                      | 4.787     | 8570          | 1913    |     |
| 19                      | 5.040     | 1458          | 269     |     |
| 20                      | 7.682     | 2684          | 1140    |     |
| 21                      | 7.758     | 2312          | 1061    |     |
| 22                      | 8.134     | 1305          | 484     |     |
| 23                      | 8.241     | 1245          | 318     |     |
| 24                      | 8.409     | 3197          | 1155    |     |
| 25                      | 8.649     | 2143          | 294     |     |
| 26                      | 9.840     | 3937          | 1170    |     |
| Total                   |           | 18773142      | 4289441 |     |

Figure S90 – HPLC trace forming compound 22.

### 6-Bromo-deazapurine-2'-arabino-fluoro-ribose (29)

D388080.1.fid  
 Person yhb21167  
 AS.Araf.M  
 @proton DMSO (C:\NMR\data) GAB 110

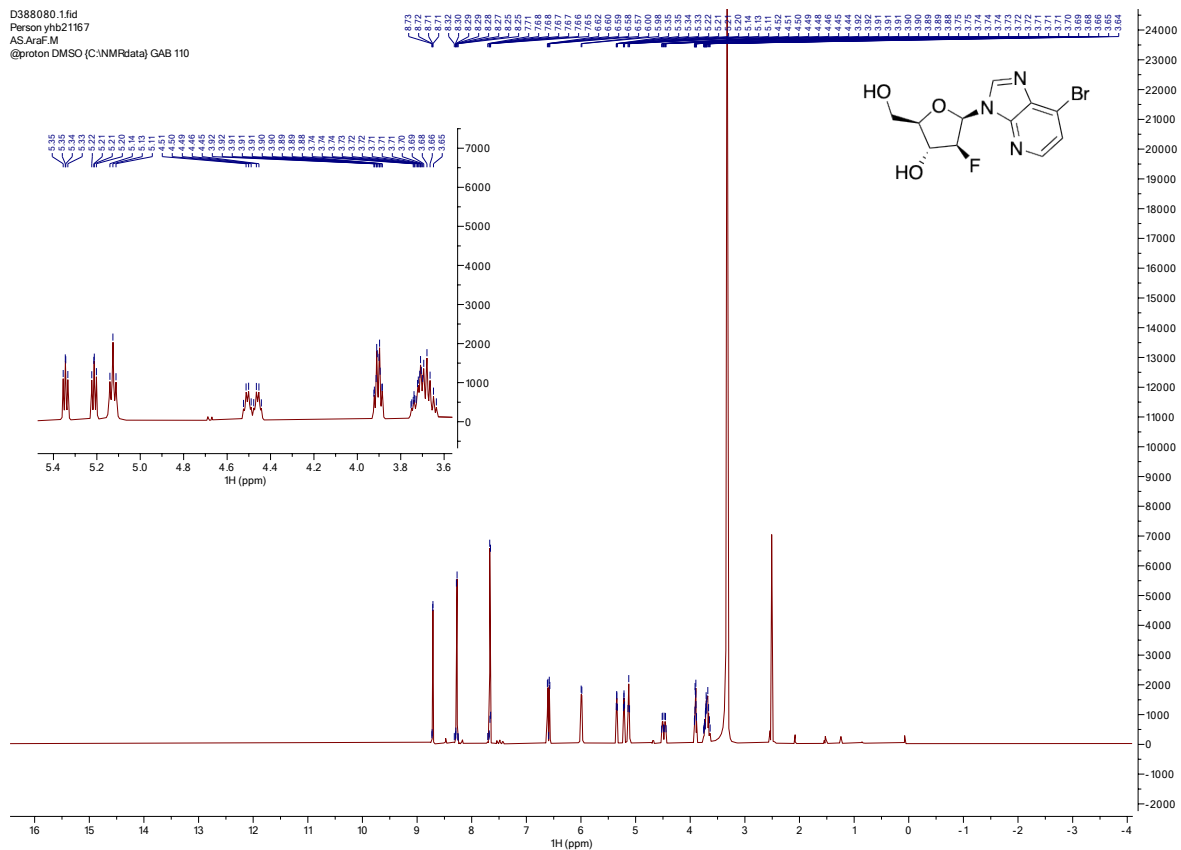

Figure S91 – <sup>1</sup>H NMR of compound 29.

E81533.1.fid  
 Person yhb21167  
 AS.2FARA.M

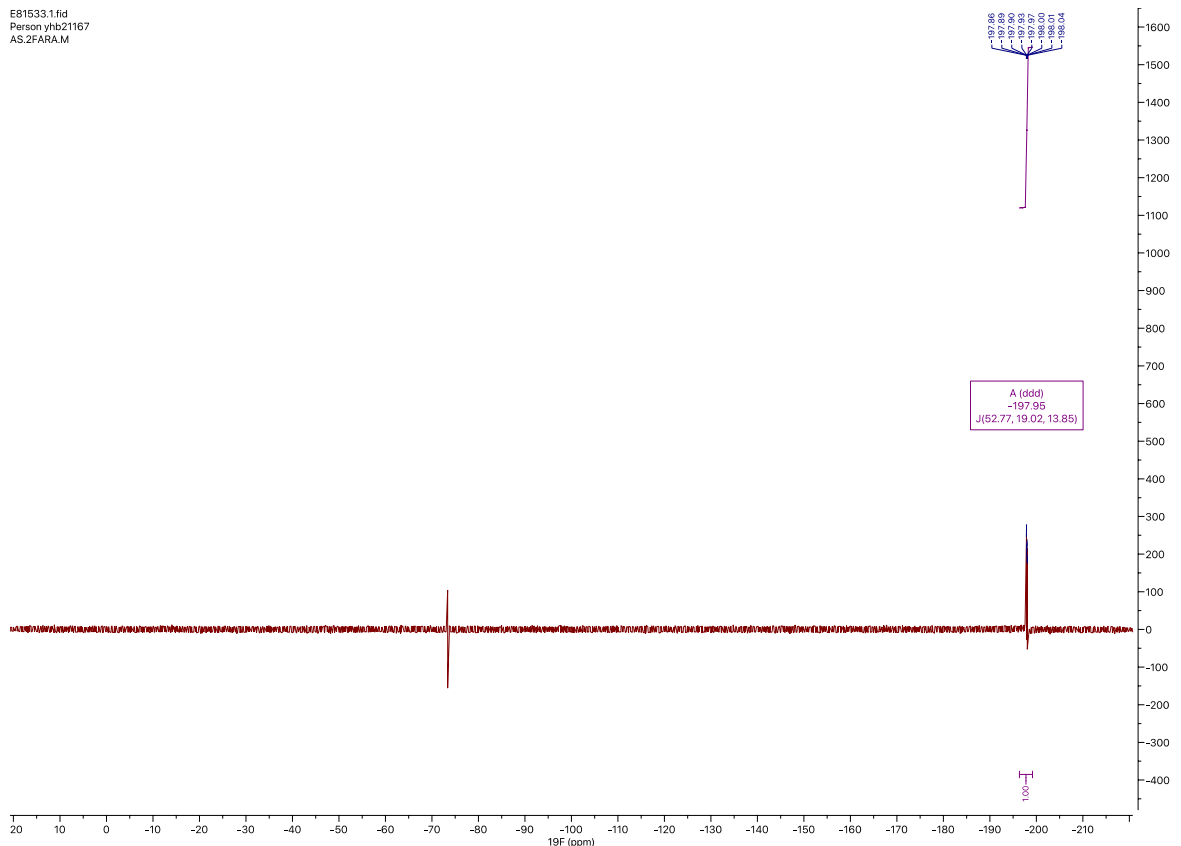

Figure S92 – <sup>19</sup>F NMR of compound 29 (-73.4 ppm corresponds to TFA).

D388080.7.fid  
Person yhb21167  
AS.AraF.M  
13C\_@DMSO (C:\NMRdata) GAB 110

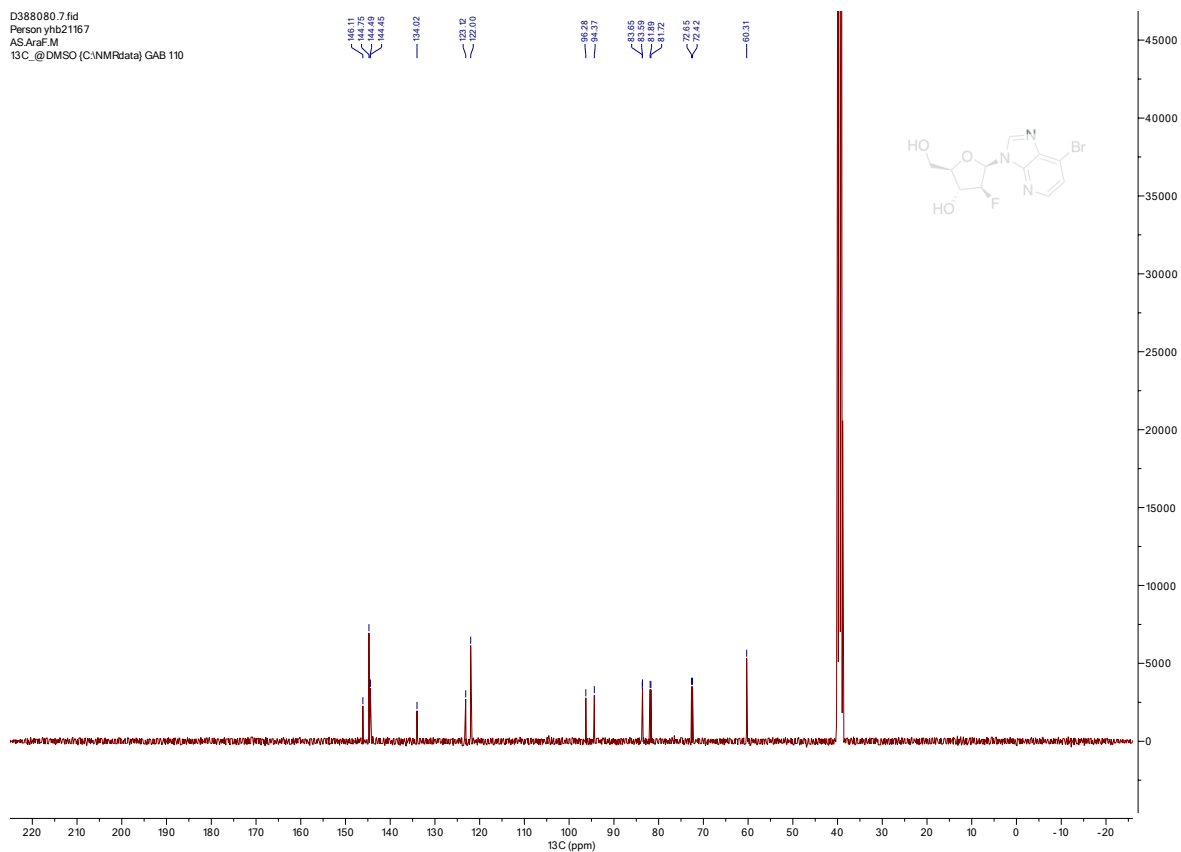

Figure S93 – <sup>13</sup>C NMR of compound 29.

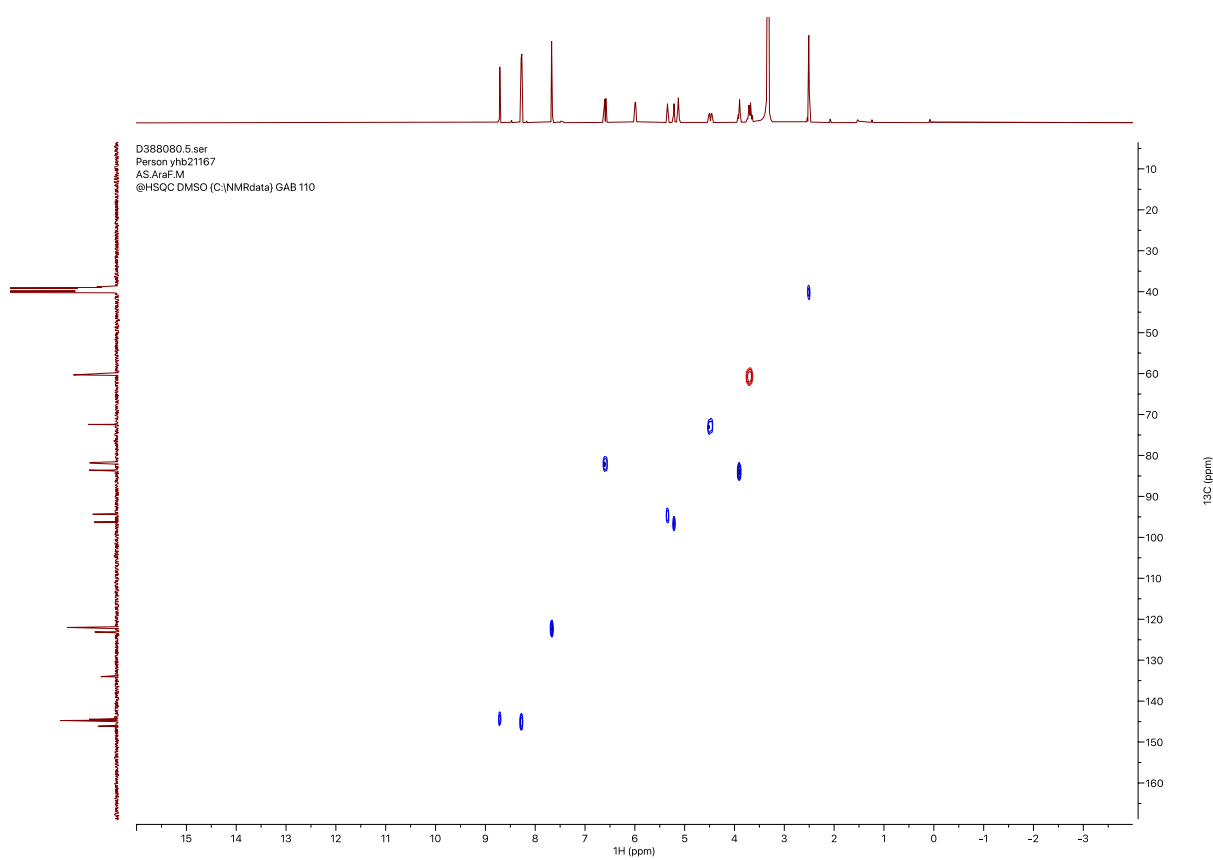

Figure S94 – HSQC of compound 29.

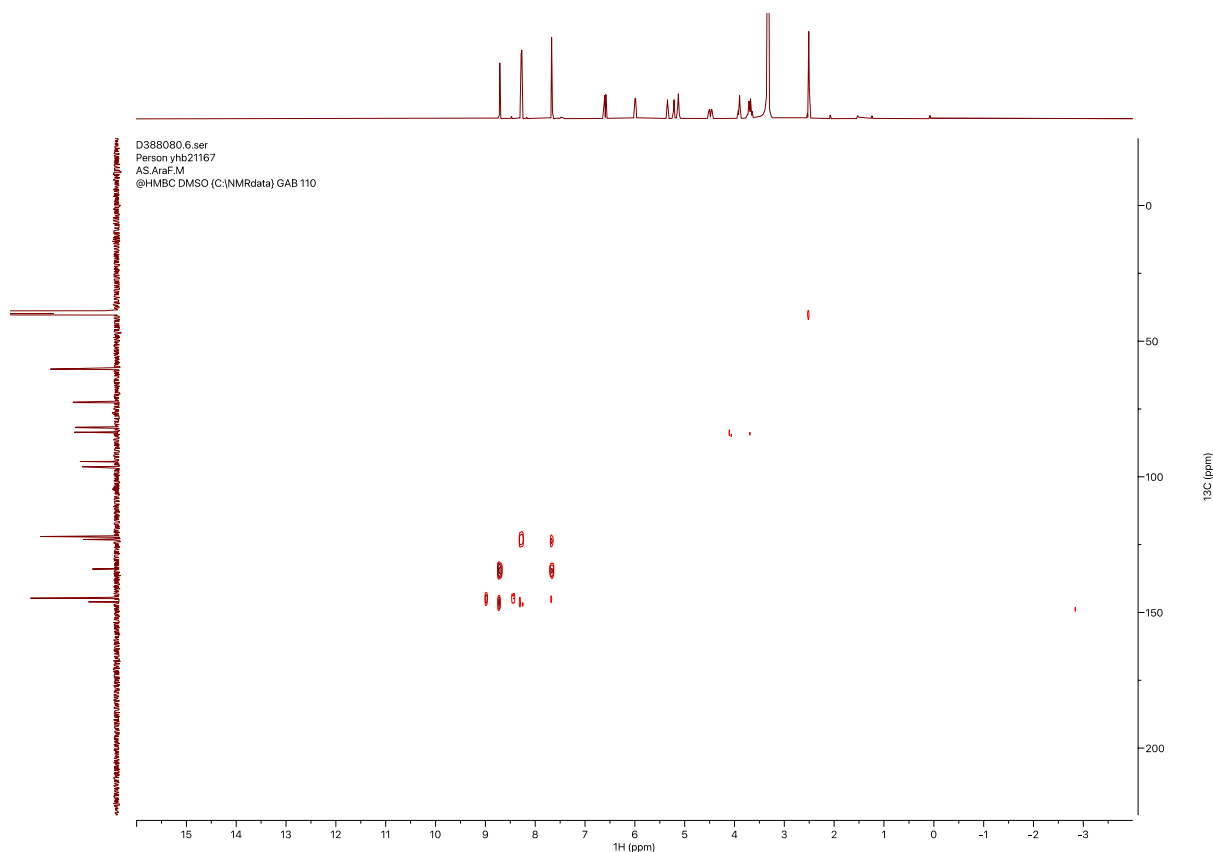

Figure S95 – HMBC of compound 29.

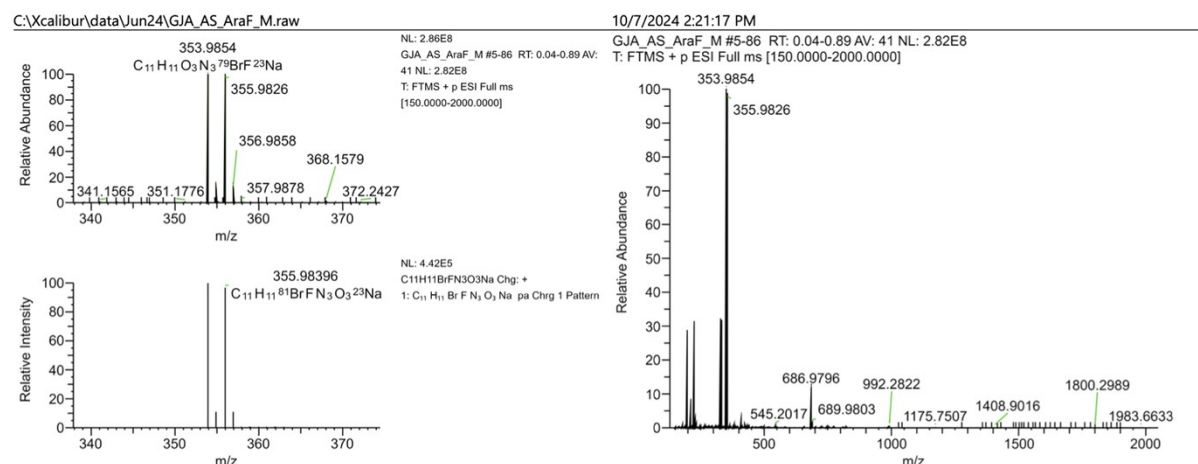

| Peak Mass | Display For...                                                                                                  | S Fit                | RDB   | Delta [ppm] | Theo. mass | Rank | Combined S... | # Matched I... | # Missed Iso. | MS Cov. [%] | Pattern Cov... | MSMS Matc... |
|-----------|-----------------------------------------------------------------------------------------------------------------|----------------------|-------|-------------|------------|------|---------------|----------------|---------------|-------------|----------------|--------------|
| 353.9854  | C <sub>11</sub> H <sub>11</sub> O <sub>3</sub> N <sub>3</sub> <sup>7</sup><br><sup>9</sup> BrF <sup>23</sup> Na | 50.95462067<br>68232 | 6.50  | -1.81       | 353.98600  | 1    | 96.38         | 5              | 0             | 98.9        | 100            | (Collection) |
| 353.9854  | C <sub>12</sub> H <sub>5</sub> N <sub>9</sub> <sup>79</sup> Br                                                  | 49.47691577<br>55966 | 14.50 | 2.21        | 353.98458  | 2    | 95.85         | 5              | 0             | 98.42       | 99.65          | (Collection) |
| 353.9854  | C <sub>9</sub> H <sub>9</sub> O <sub>2</sub> N <sub>6</sub> <sup>79</sup> B<br>rF <sup>23</sup> Na              | 43.60830658<br>31975 | 7.00  | 1.98        | 353.98466  | 3    | 95.54         | 5              | 0             | 98.42       | 99.65          | (Collection) |
| 353.9854  | C <sub>8</sub> H <sub>6</sub> ON <sub>9</sub> <sup>79</sup> Br<br>F                                             | 38.99187006<br>97081 | 10.50 | -1.02       | 353.98572  | 4    | 95.29         | 5              | 0             | 98.42       | 99.73          | (Collection) |
| 353.9854  | C <sub>13</sub> H <sub>11</sub> O <sub>3</sub> N <sub>2</sub> <sup>7</sup><br><sup>9</sup> Br                   | 35.95695955<br>09515 | 9.00  | 2.19        | 353.98459  | 5    | 95.13         | 6              | 0             | 98.42       | 99.17          | (Collection) |
| 353.9854  | C <sub>10</sub> H <sub>12</sub> O <sub>4</sub> N <sub>2</sub> <sup>7</sup><br><sup>9</sup> BrF                  | 34.63553628<br>94705 | 5.00  | -1.04       | 353.98573  | 6    | 95.06         | 6              | 0             | 98.42       | 99.21          | (Collection) |
| 353.9854  | C <sub>12</sub> O <sub>7</sub> N <sub>7</sub>                                                                   | 28.19167948<br>82148 | 16.50 | -0.03       | 353.98537  | 7    | 48.62         | 2              | 2             | 49.75       | 98             | (Collection) |
| 353.9854  | C <sub>13</sub> H <sub>6</sub> O <sub>12</sub>                                                                  | 26.20851179<br>0464  | 11.00 | -0.04       | 353.98538  | 8    | 48.51         | 2              | 2             | 49.75       | 97.01          | (Collection) |
| 353.9854  | C <sub>9</sub> H <sub>4</sub> O <sub>9</sub> N <sub>4</sub> F <sup>23</sup><br>Na                               | 26.08870716<br>07498 | 9.00  | -0.26       | 353.98545  | 9    | 48.51         | 2              | 2             | 49.75       | 97.88          | (Collection) |
| 353.9854  | C <sub>12</sub> H <sub>3</sub> O <sub>8</sub> N <sub>4</sub> <sup>23</sup><br>Na                                | 22.99406960<br>58846 | 13.00 | 2.97        | 353.98431  | 10   | 48.34         | 2              | 2             | 49.75       | 97.84          | (Collection) |

Figure S96 – HRMS of compound 29.

**Sample name:** f-ara-M  
**Description:**  
**Sample amount:** 0.000  
**Sample type:** Sample  
**Instrument:** Shimadzu LC  
**Location:** 1:2  
**Injection date:** 2024-06-07 11:30:49+01:00  
**Injection:** 1 of 1  
**Acq. method:** Transglycosylation run-1.5ml-min.amx  
**Injection volume:** 10.000 µL

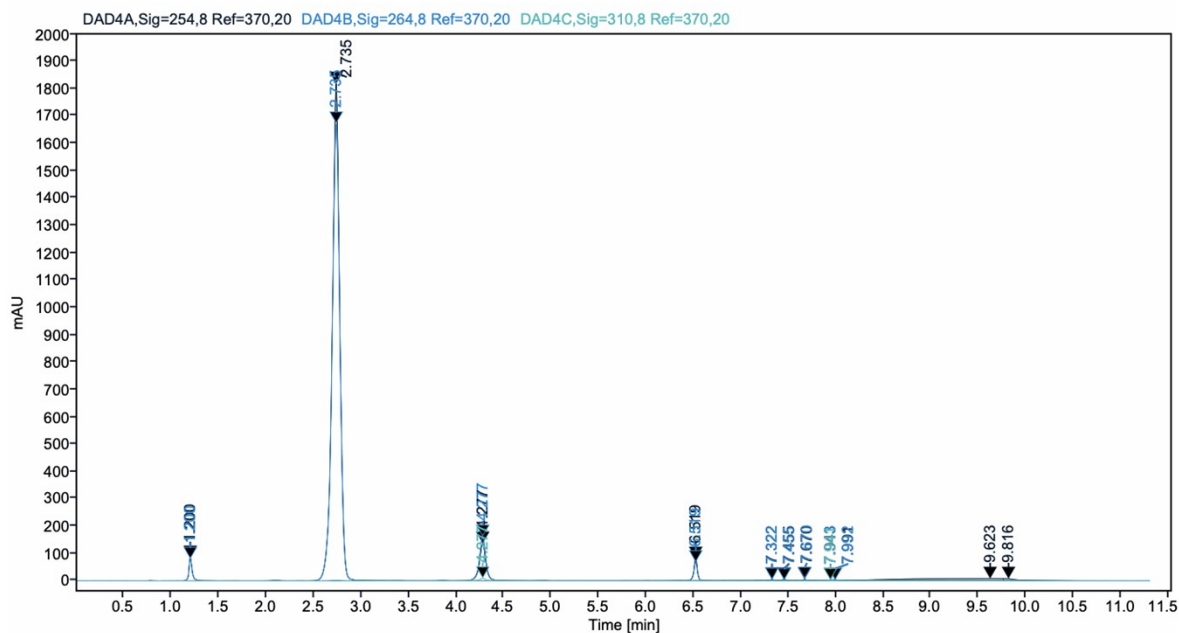

Figure S97 – HPLC trace of the reaction forming compound 29.

### 6-Bromo-deazapurine-2'-fluoro-ribose (27)

D388081.1.fid  
 Person YHB21167  
 AS.2fdc.M  
 @proton DMSO (C:\NMR\data) GAB 111

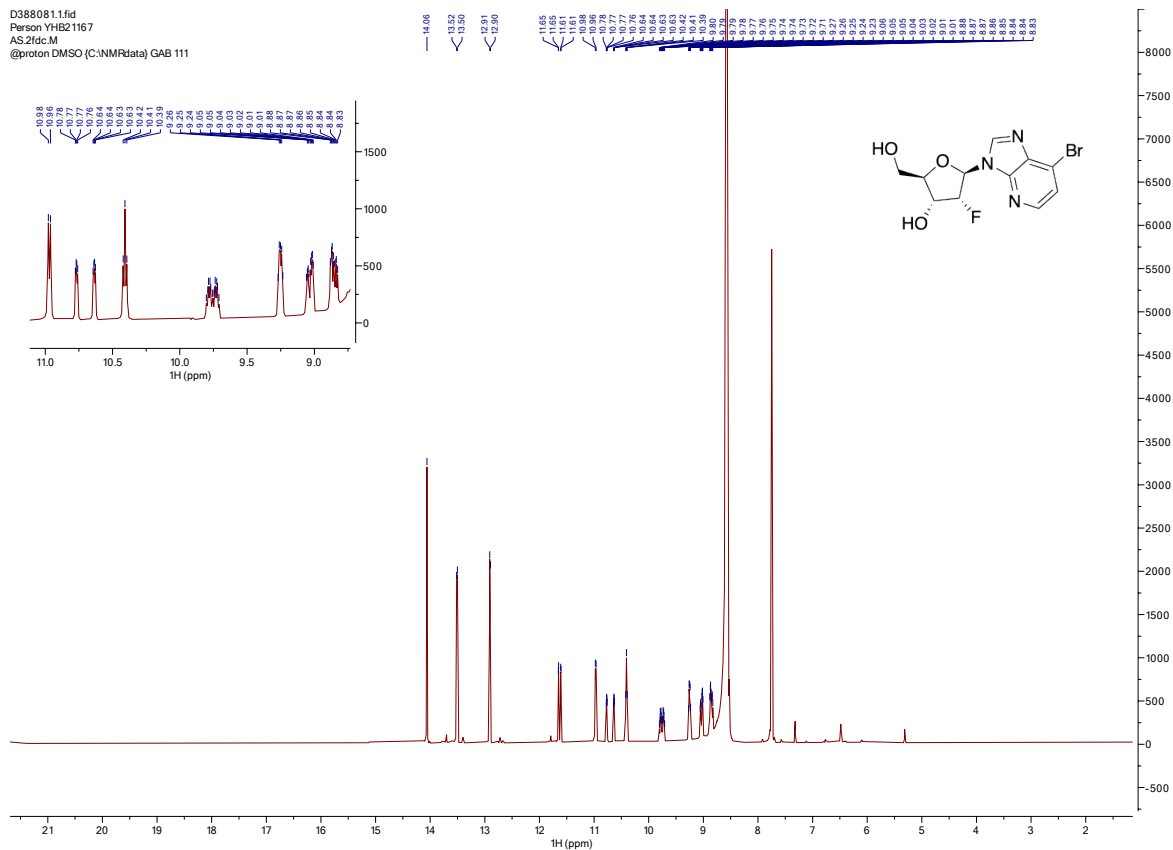

Figure S98 – <sup>1</sup>H NMR of compound 27.

D388081.7.fid  
 Person YHB21167  
 AS.2fdc.M  
 13C\_@DMSO (C:\NMR\data) GAB 111

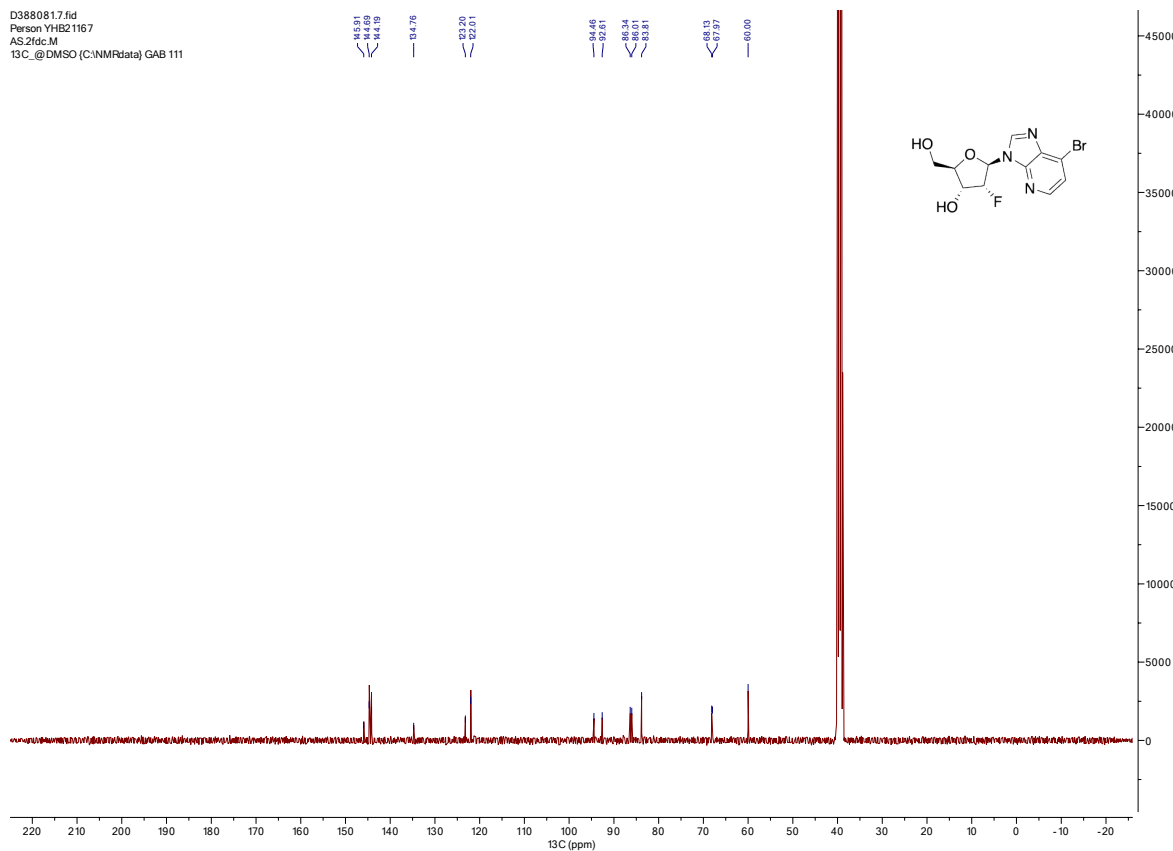

Figure S99 – <sup>13</sup>C NMR of compound 27.

E81532.1.fid  
Person yhb21167  
AS.2FDC-M

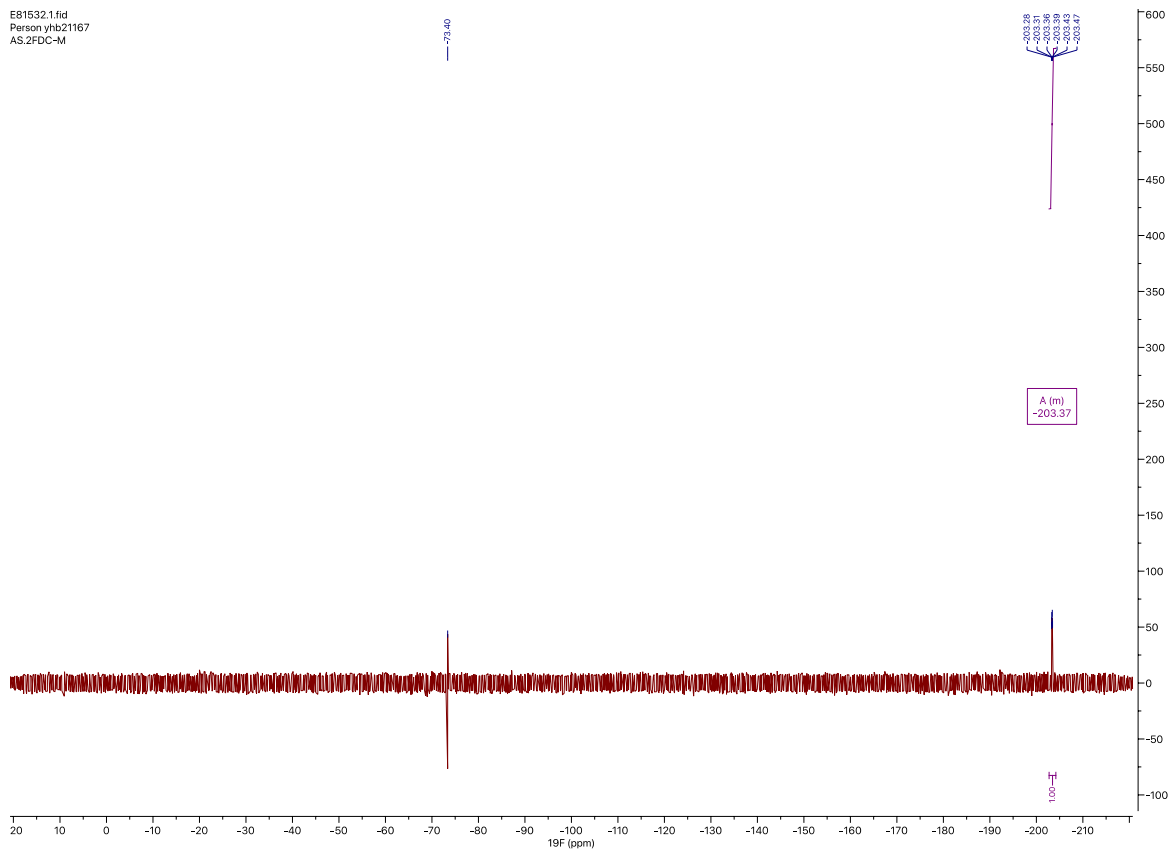

Figure S100 –  $^{19}\text{F}$  NMR of compound 27 (-73.4 ppm corresponds to TFA).

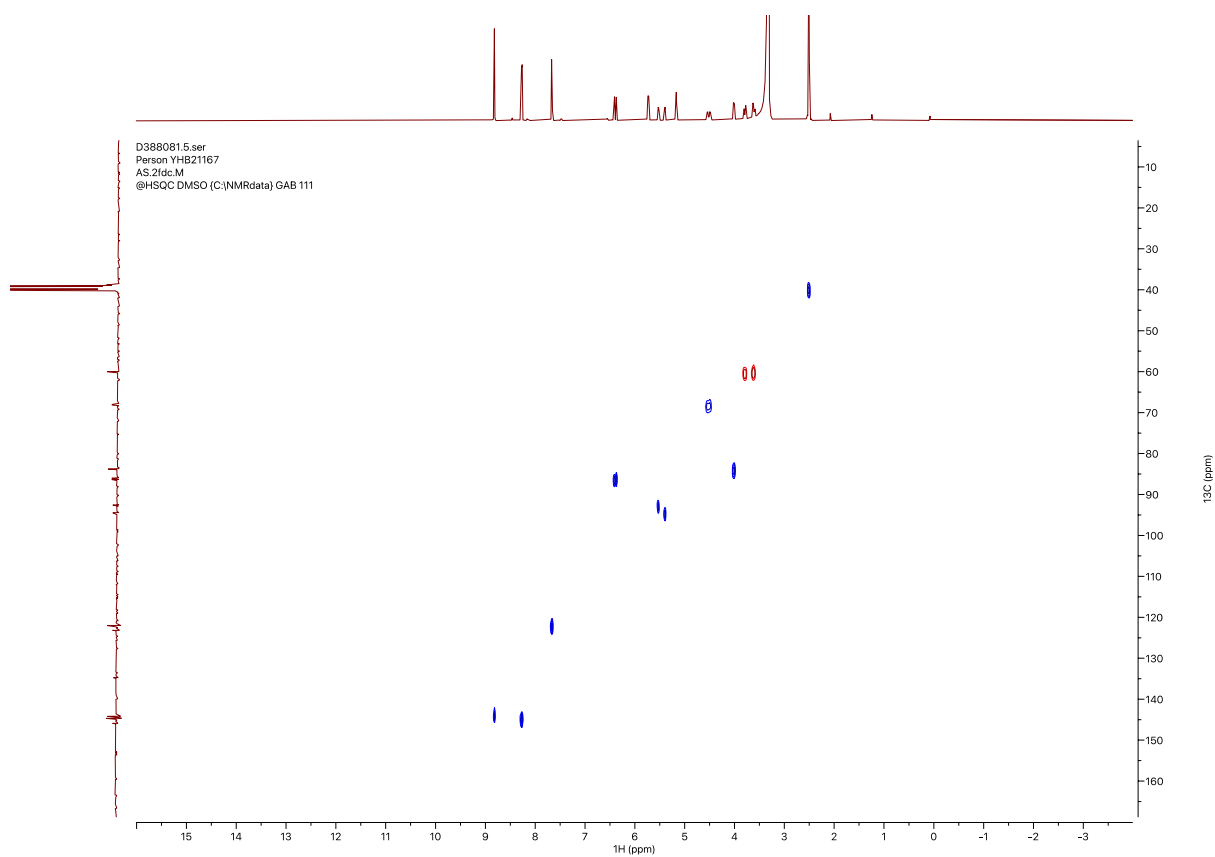

Figure S101 – HSQC of compound 27.

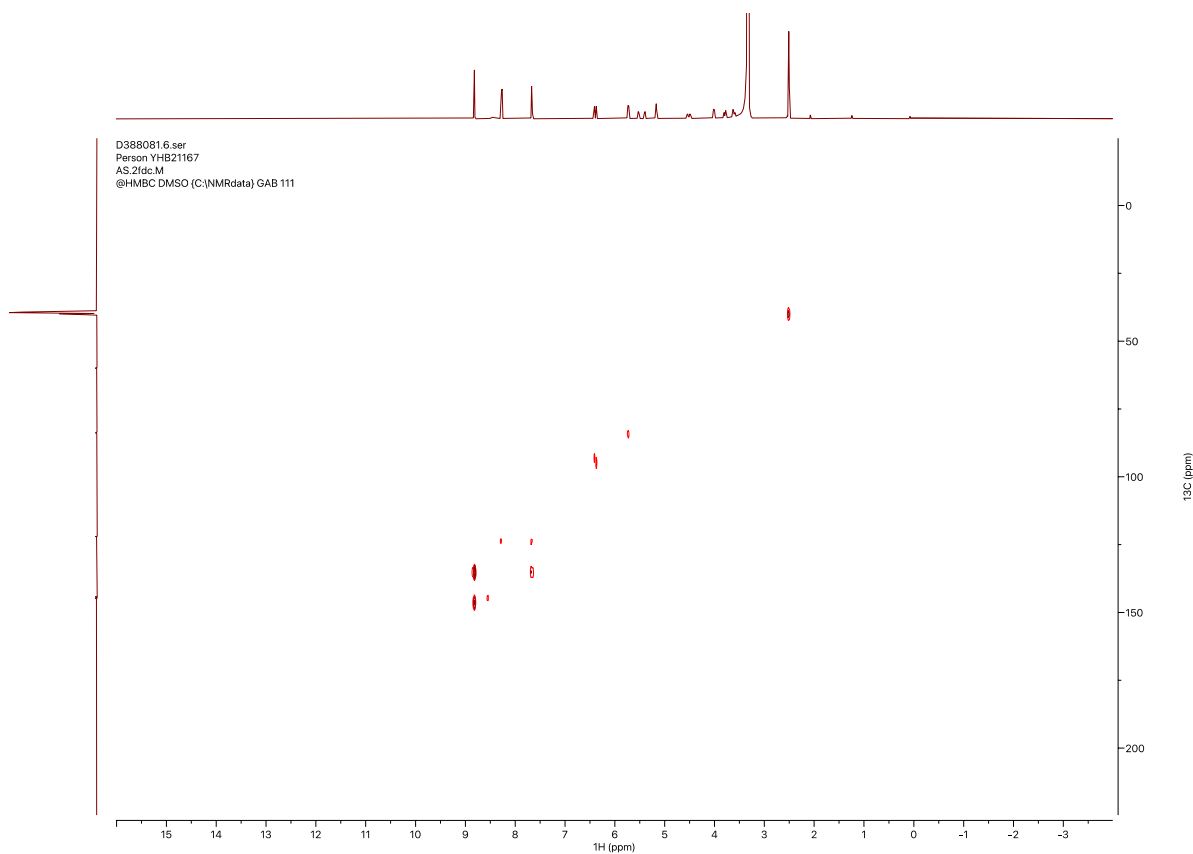

Figure S102 – HMBN of compound 27.

|                        |                                      |                          |           |
|------------------------|--------------------------------------|--------------------------|-----------|
| <b>Sample name:</b>    | 2fdc-m                               | <b>Sample type:</b>      | Sample    |
| <b>Description:</b>    |                                      | <b>Location:</b>         | 1:16      |
| <b>Sample amount:</b>  | 0.000                                | <b>Injection:</b>        | 1 of 1    |
| <b>Instrument:</b>     | Shimadzu LC                          | <b>Injection volume:</b> | 10.000 µL |
| <b>Injection date:</b> | 2024-06-07 12:42:01+01:00            |                          |           |
| <b>Acq. method:</b>    | Transglycosylation run-1.5ml-min.amx |                          |           |

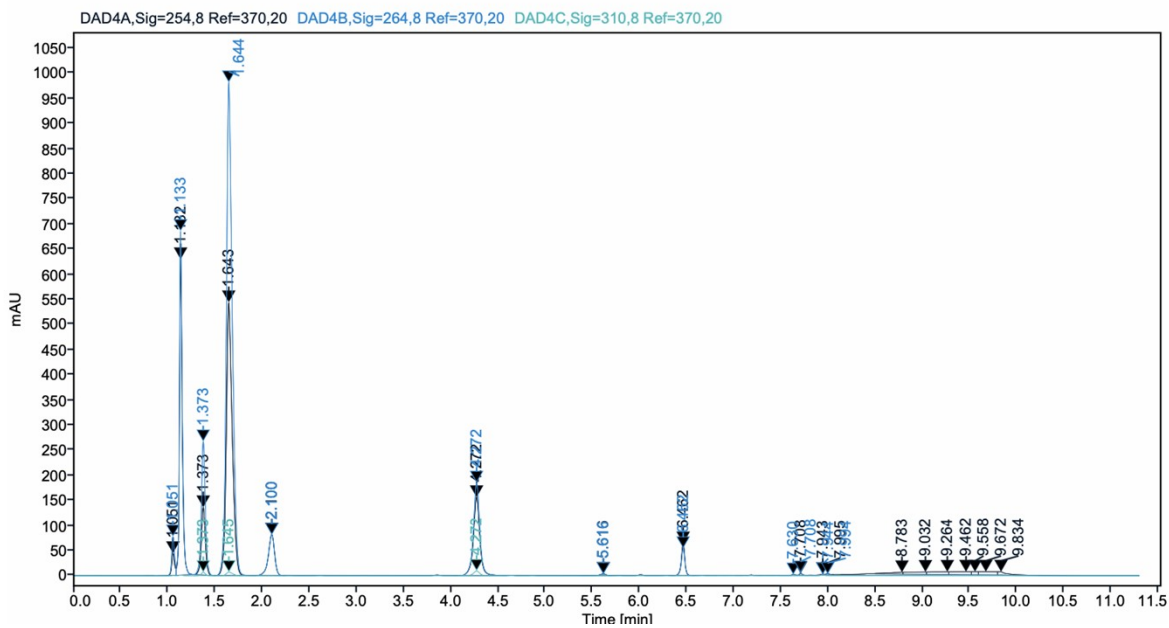

Figure S103 – HPLC trace of the reaction forming compound 27.



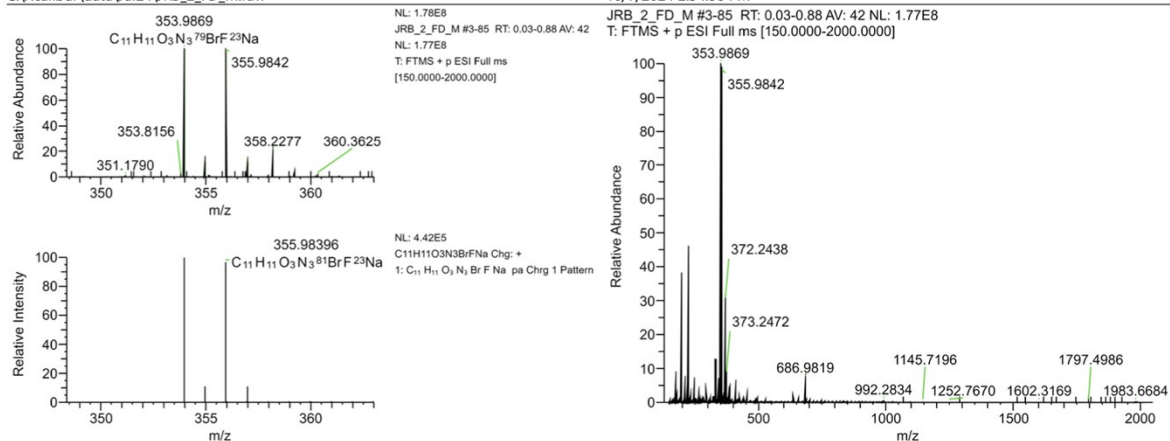

| Peak Mass | Display For...                                                                                   | S Fit                | RDB   | Delta [ppm] | Theo. mass | Rank | Combined S... | # Matched I... | # Missed Iso. | MS Cov. [%] | Pattern Cov.... | MSMS Matc... |
|-----------|--------------------------------------------------------------------------------------------------|----------------------|-------|-------------|------------|------|---------------|----------------|---------------|-------------|-----------------|--------------|
| 353.9869  | C <sub>11</sub> H <sub>11</sub> O <sub>3</sub> N <sub>3</sub> <sup>79</sup> BrF <sup>23</sup> Na | 76.35948696<br>20547 | 6.50  | 2.57        | 353.98600  | 1    | 89.39         | 5              | 0             | 90.11       | 100             | (Collection) |
| 353.9869  | C <sub>11</sub> H <sub>6</sub> O <sub>2</sub> N <sub>6</sub> <sup>79</sup> BrF                   | 67.92890699<br>44871 | 10.00 | -0.43       | 353.98707  | 2    | 88.95         | 5              | 0             | 90.11       | 100             | (Collection) |
| 353.9869  | C <sub>9</sub> H <sub>6</sub> ON <sub>3</sub> <sup>79</sup> BrF                                  | 36.89261553<br>98265 | 10.50 | 3.36        | 353.98572  | 3    | 86.91         | 5              | 0             | 89.69       | 99.73           | (Collection) |
| 353.9869  | C <sub>10</sub> H <sub>12</sub> O <sub>6</sub> N <sub>2</sub> <sup>7</sup> BrF                   | 34.90482935<br>14297 | 5.00  | 3.35        | 353.98573  | 4    | 86.8          | 6              | 0             | 89.69       | 99.21           | (Collection) |
| 353.9869  | C <sub>13</sub> H <sub>13</sub> O <sub>4</sub> <sup>79</sup> BrF <sup>23</sup> Na                | 31.73593130<br>38421 | 6.00  | -1.22       | 353.98735  | 5    | 86.64         | 6              | 0             | 89.69       | 99.27           | (Collection) |
| 353.9869  | C <sub>11</sub> H <sub>6</sub> O <sub>10</sub> NF <sup>2</sup> <sup>3</sup> Na                   | 29.19424162<br>42034 | 8.50  | 0.34        | 353.98679  | 6    | 44.45         | 2              | 2             | 45.3        | 97.57           | (Collection) |
| 353.9869  | C <sub>10</sub> O <sub>3</sub> N <sub>6</sub> F <sup>23</sup> Na                                 | 28.60634984<br>18542 | 14.00 | 0.35        | 353.98679  | 7    | 44.42         | 2              | 2             | 45.3        | 98.56           | (Collection) |
| 353.9869  | C <sub>10</sub> H <sub>7</sub> O <sub>13</sub> F                                                 | 28.30025792<br>20626 | 7.00  | 1.11        | 353.98652  | 8    | 44.4          | 2              | 2             | 45.3        | 97.07           | (Collection) |
| 353.9869  | C <sub>9</sub> HO <sub>8</sub> N <sub>3</sub> F                                                  | 25.25868311<br>05188 | 12.50 | 1.13        | 353.98651  | 9    | 44.24         | 2              | 2             | 45.3        | 98.05           | (Collection) |
| 353.9869  | C <sub>11</sub> H <sub>3</sub> O <sub>9</sub> N <sub>4</sub> F                                   | 24.02362567<br>67394 | 12.00 | -2.67       | 353.98786  | 10   | 44.18         | 2              | 2             | 45.3        | 97.74           | (Collection) |

Figure S104 – HRMS trace of compound 27.

**2-chloro-adenosine-2'-fluoro-ribose (28)**

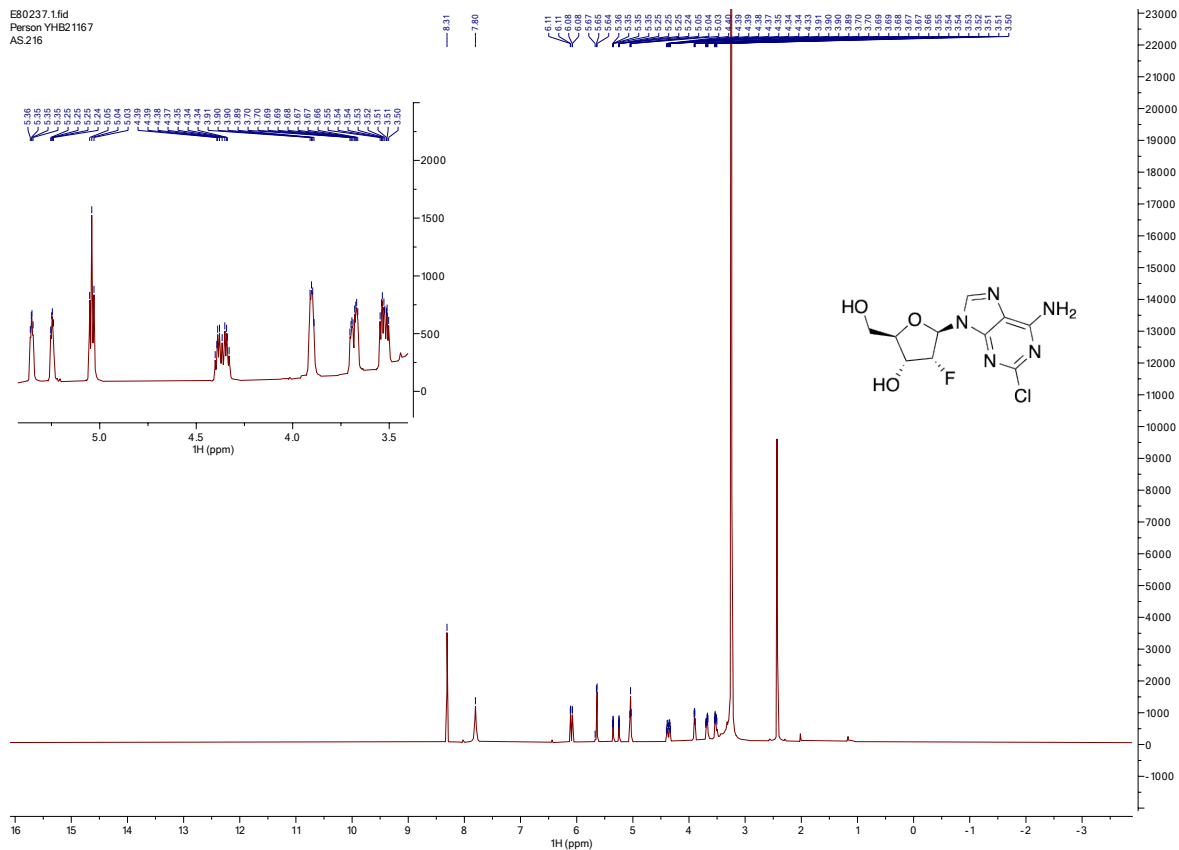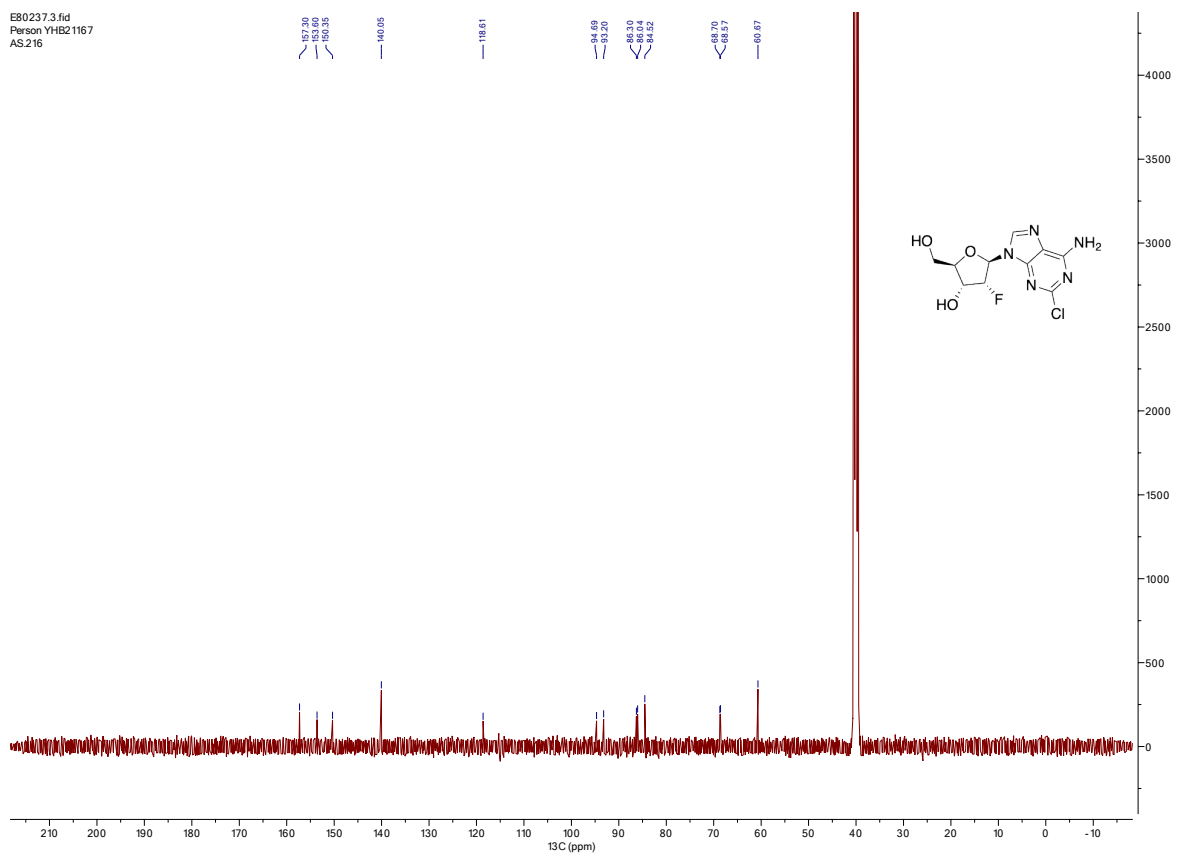

E80262.1.fid  
Person yhb21167  
AS216

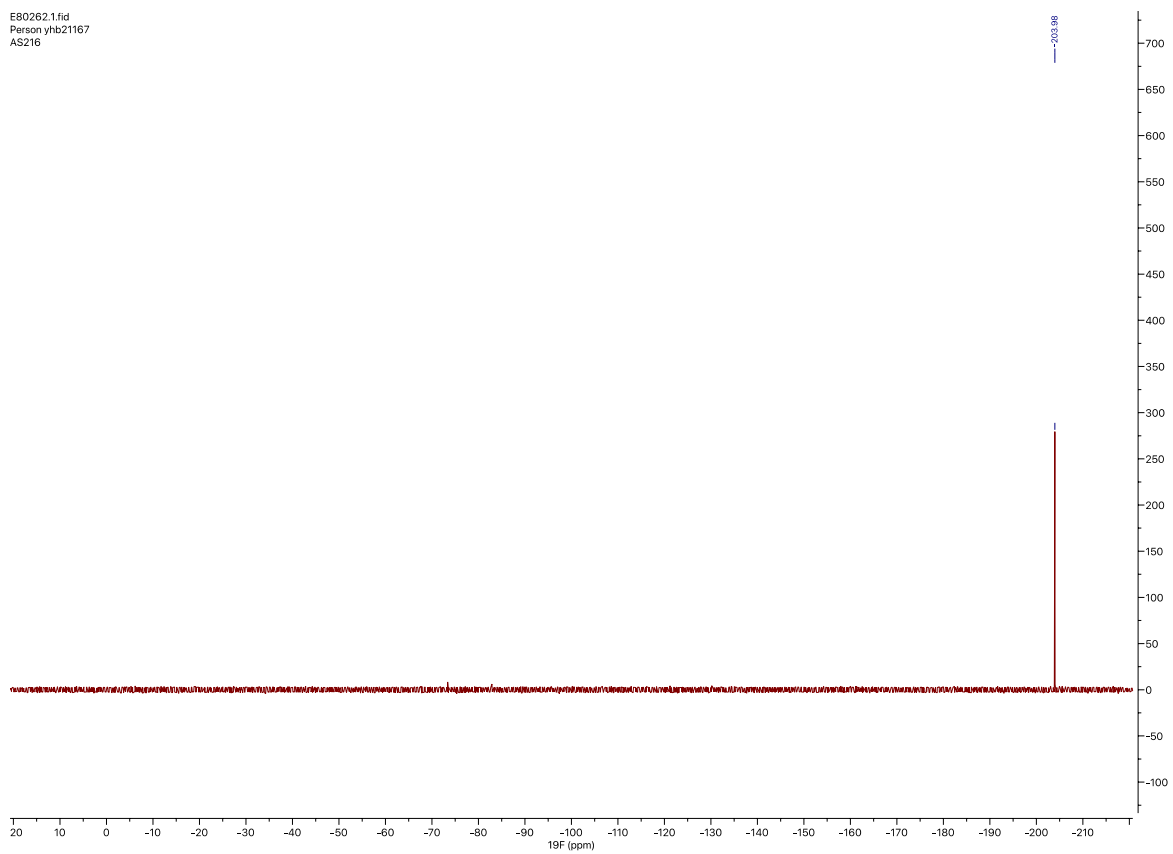

Figure S107 –  $^{19}\text{F}$  NMR of compound 28

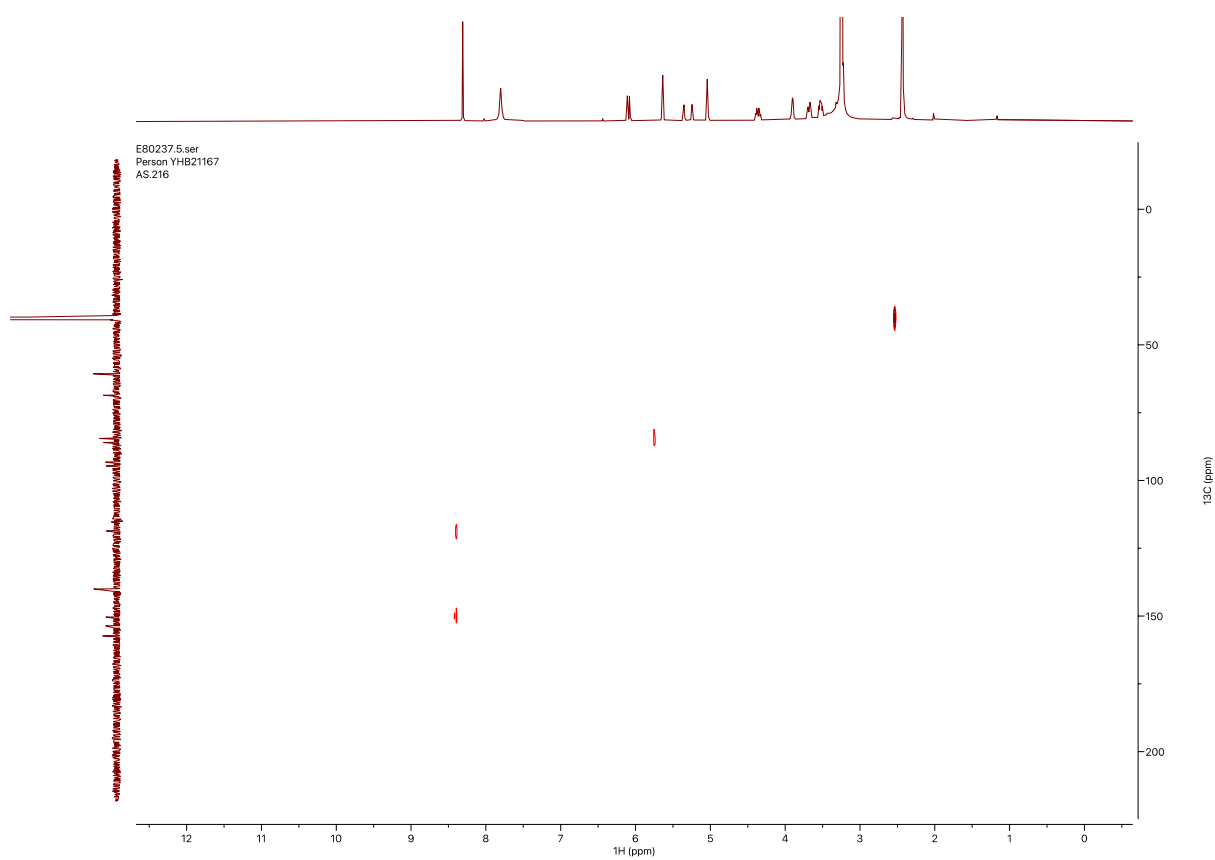

Figure S108 – HMBC of compound 28.

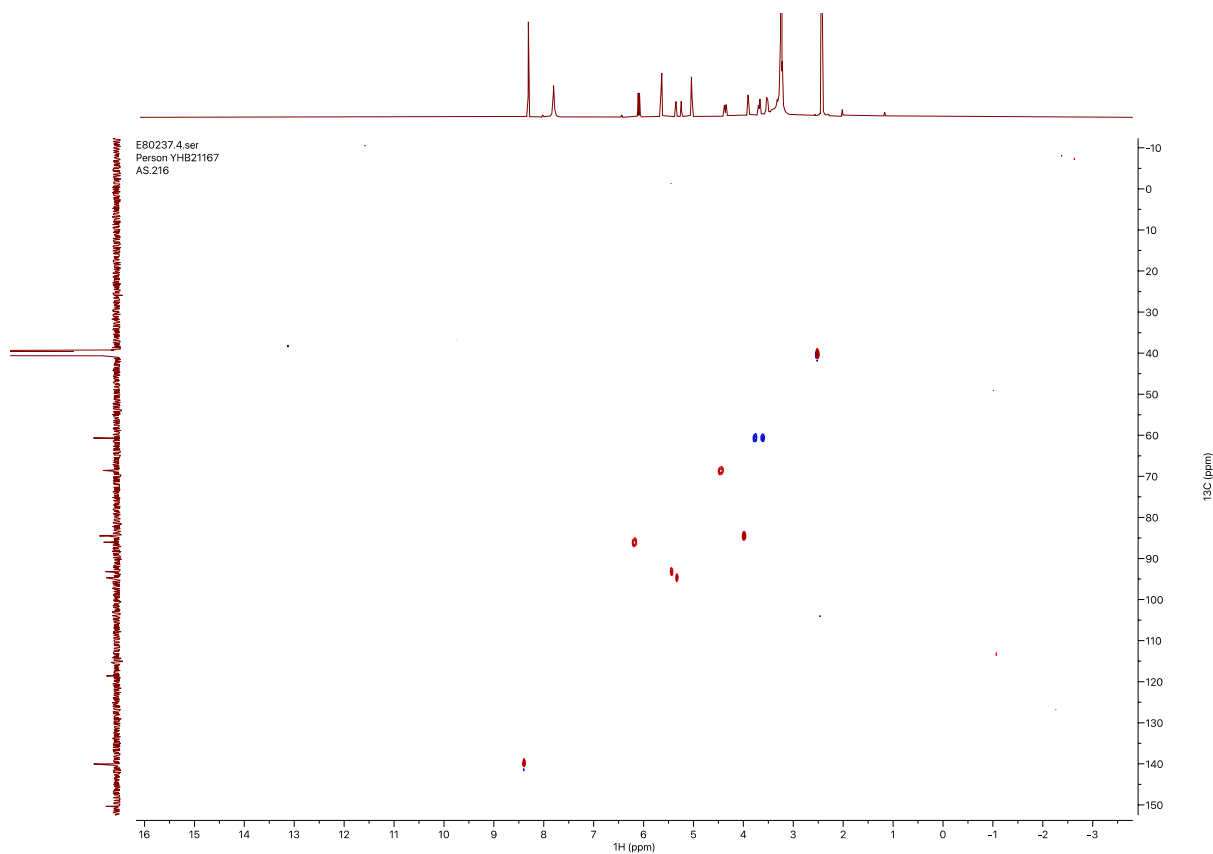

Figure S109 – HSQC NMR of compound 28.

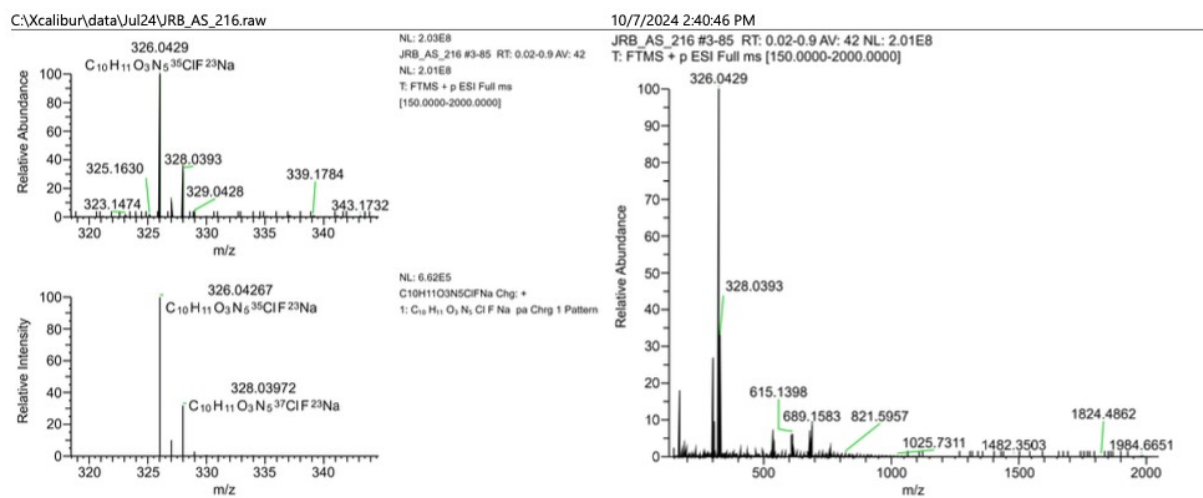

| Peak Mass | Display For...                                                                                                  | S Fit                | RDB   | Delta [ppm] | Theo. mass | Rank | Combined S... | # Matched I... | # Missed Iso. | MS Cov. [%] | Pattern Cov... | MSMS Matc... |
|-----------|-----------------------------------------------------------------------------------------------------------------|----------------------|-------|-------------|------------|------|---------------|----------------|---------------|-------------|----------------|--------------|
| 326.0429  | C <sub>10</sub> H <sub>11</sub> O <sub>3</sub> N <sub>5</sub> <sup>3</sup><br><sup>5</sup> ClF <sup>23</sup> Na | 75.19462403<br>46319 | 6.50  | 0.79        | 326.04267  | 1    | 97.49         | 5              | 0             | 98.73       | 100            | (Collection) |
| 326.0429  | C <sub>9</sub> H <sub>12</sub> O <sub>3</sub> N <sub>4</sub> <sup>35</sup><br>ClF                               | 53.21974290<br>44823 | 5.00  | 1.64        | 326.04239  | 2    | 96.16         | 5              | 0             | 98.54       | 99.67          | (Collection) |
| 326.0429  | C <sub>10</sub> H <sub>8</sub> O <sub>2</sub> N <sub>8</sub> <sup>35</sup><br>ClF                               | 46.20913840<br>16164 | 10.00 | -2.47       | 326.04373  | 3    | 95.96         | 5              | 0             | 98.73       | 100            | (Collection) |
| 326.0429  | C <sub>9</sub> H <sub>15</sub> O <sub>7</sub> N <sup>35</sup><br>IF <sup>23</sup> Na                            | 33.65687861<br>20133 | 1.50  | 4.90        | 326.04133  | 4    | 95.13         | 5              | 0             | 98.54       | 99.63          | (Collection) |
| 326.0429  | C <sub>11</sub> H <sub>14</sub> O <sub>7</sub> N <sup>35</sup><br>ClF                                           | 23.41521534<br>11576 | 4.50  | -2.48       | 326.04373  | 5    | 92.5          | 5              | 0             | 96.34       | 96.97          | (Collection) |
| 326.0429  | C <sub>8</sub> H <sub>9</sub> O <sub>2</sub> N <sub>8</sub> <sup>35</sup><br>IF <sup>23</sup> Na                | 23.15219176<br>41615 | 7.00  | 4.91        | 326.04132  | 6    | 88.26         | 5              | 0             | 91.87       | 93.71          | (Collection) |
| 326.0429  | C <sub>11</sub> H <sub>3</sub> O <sub>2</sub> N <sub>10</sub> F                                                 | 27.90243447<br>11696 | 15.00 | 3.15        | 326.04190  | 7    | 72.02         | 2              | 1             | 74.47       | 99.16          | (Collection) |
| 326.0429  | C <sub>12</sub> H <sub>9</sub> O <sub>7</sub> N <sub>3</sub> F                                                  | 10.61206843<br>8047  | 9.50  | 3.13        | 326.04190  | 8    | 64.79         | 2              | 2             | 67.8        | 86.59          | (Collection) |
| 326.0429  | C <sub>12</sub> H <sub>11</sub> O <sub>4</sub> N <sub>2</sub> <sup>3</sup><br><sup>5</sup> ClF <sup>23</sup> Na | 8.119571087<br>02233 | 6.00  | -3.32       | 326.04401  | 9    | 64.66         | 5              | 0             | 67.8        | 66.73          | (Collection) |

Figure S110 – HRMS of compound 28.

-----  
**Sample name:** 2FD  
**Description:**  
**Sample amount:** 0.000 **Sample type:** Sample  
**Instrument:** Shimadzu LC **Location:** 1:20  
**Injection date:** 2024-06-25 11:07:40+01:00 **Injection:** 1 of 1  
**Acq. method:** Transglycosylation run-1.5ml-min.amx **Injection volume:** 10.000 µL

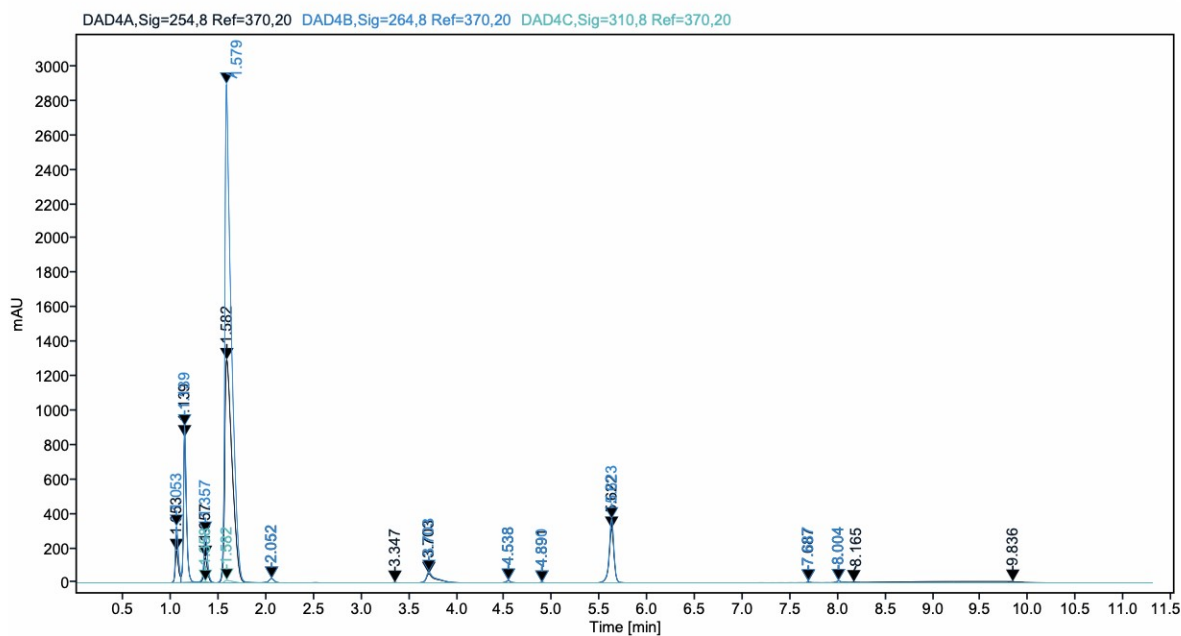

Figure S111 – HPLC trace of the reaction forming compound 28.

## 2-chloro-adenosine-2'-arabino-fluoro-ribose (30)

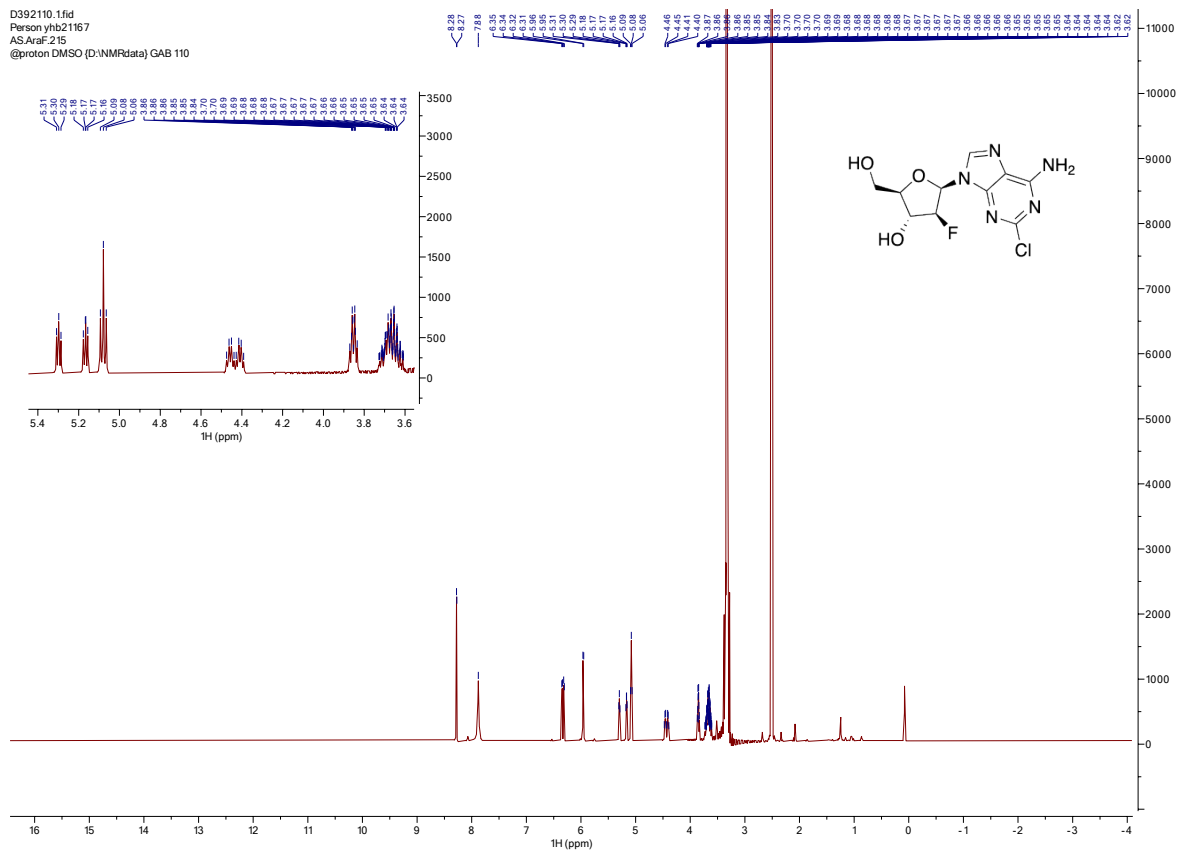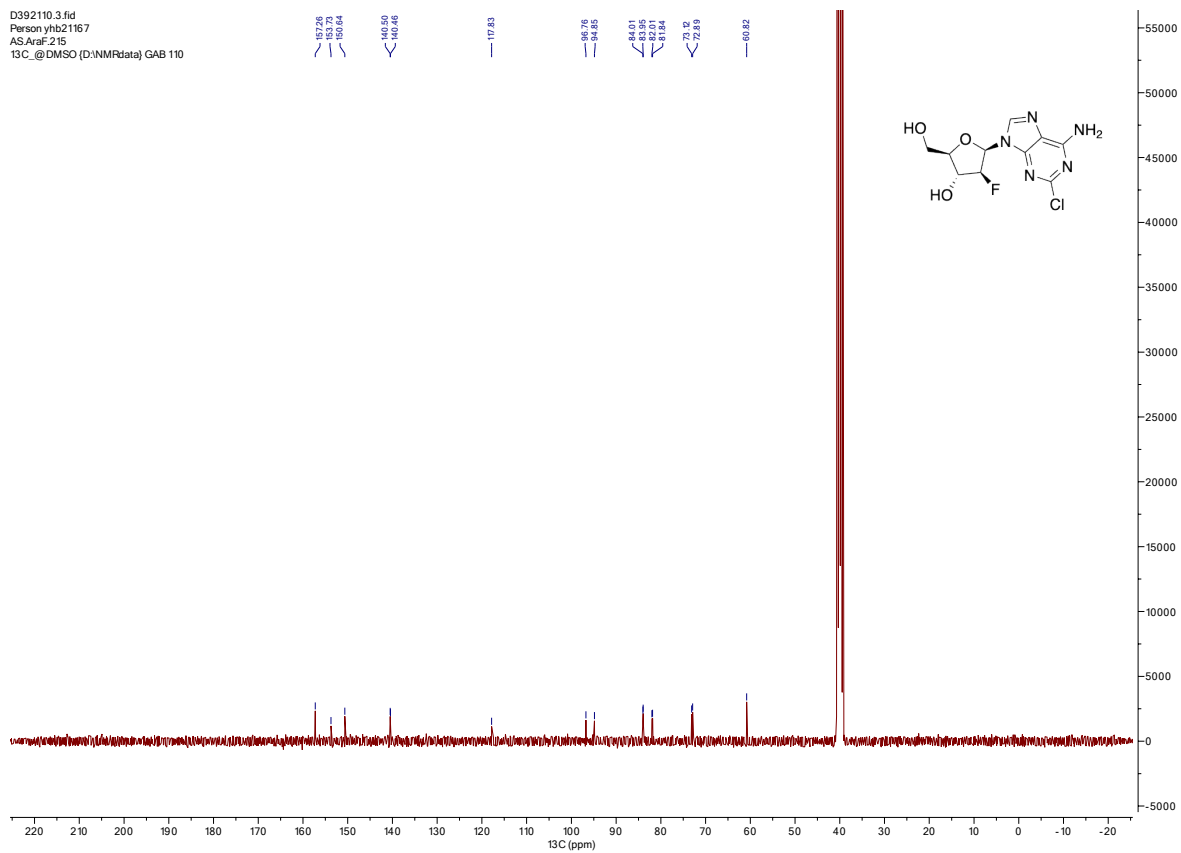

E80261.1.fid  
Person yhb21167  
AS215

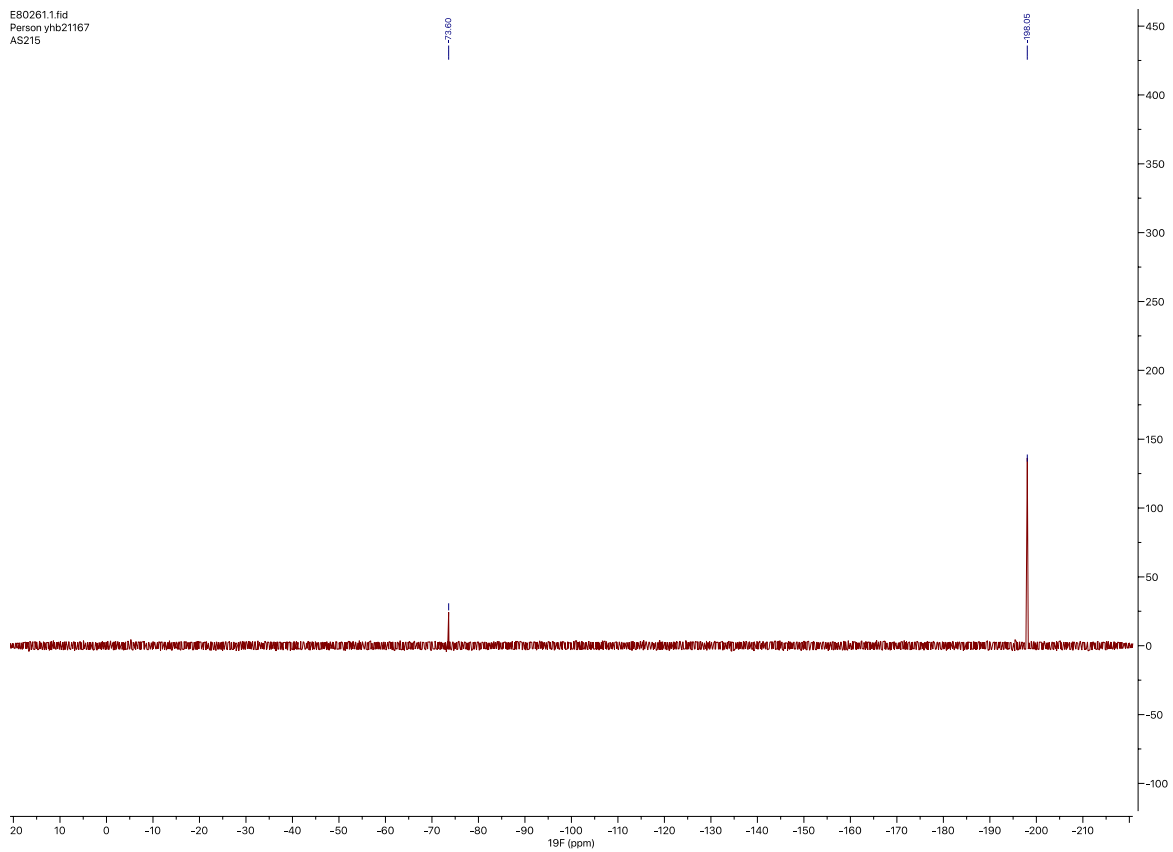

Figure S114 –  $^{19}\text{F}$  NMR of compound 30.

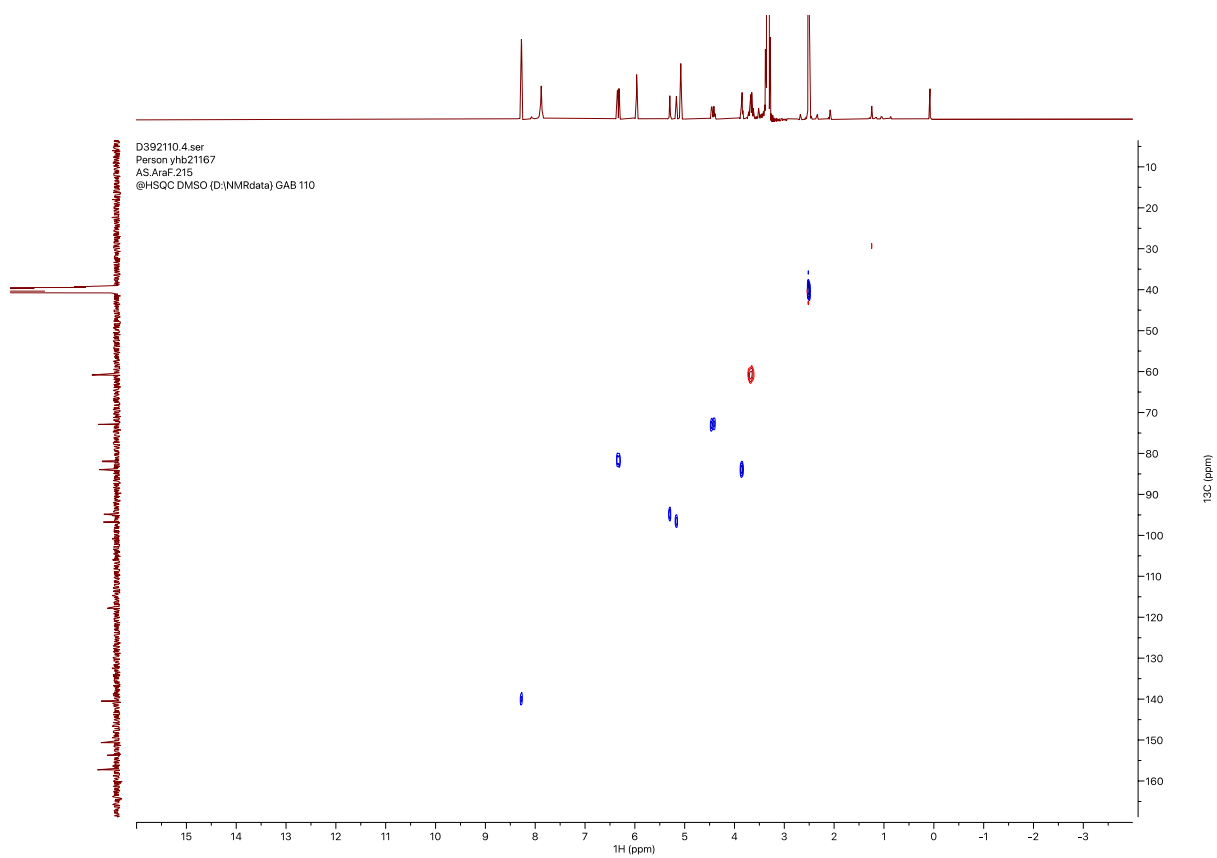

Figure S115 – HSQC of compound 30.

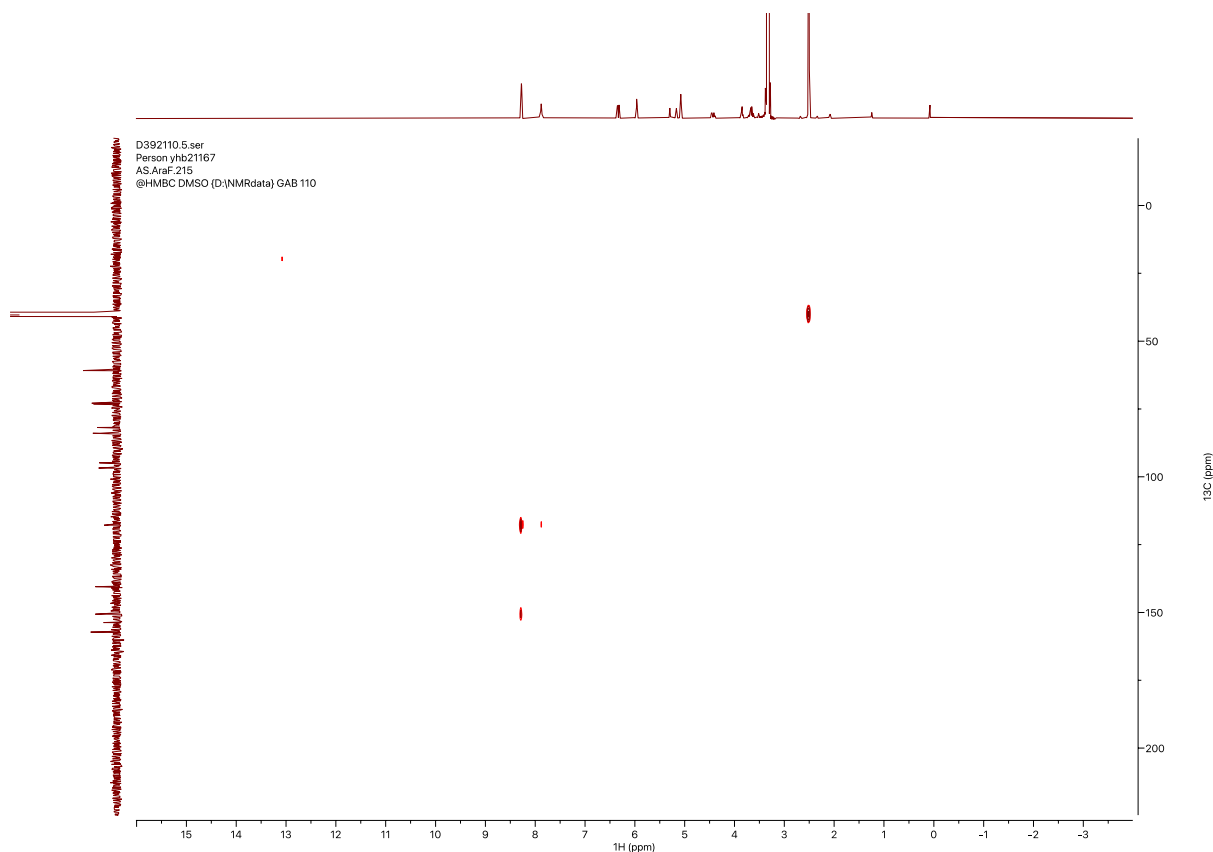

Figure S116 – HMBC of compound 30.

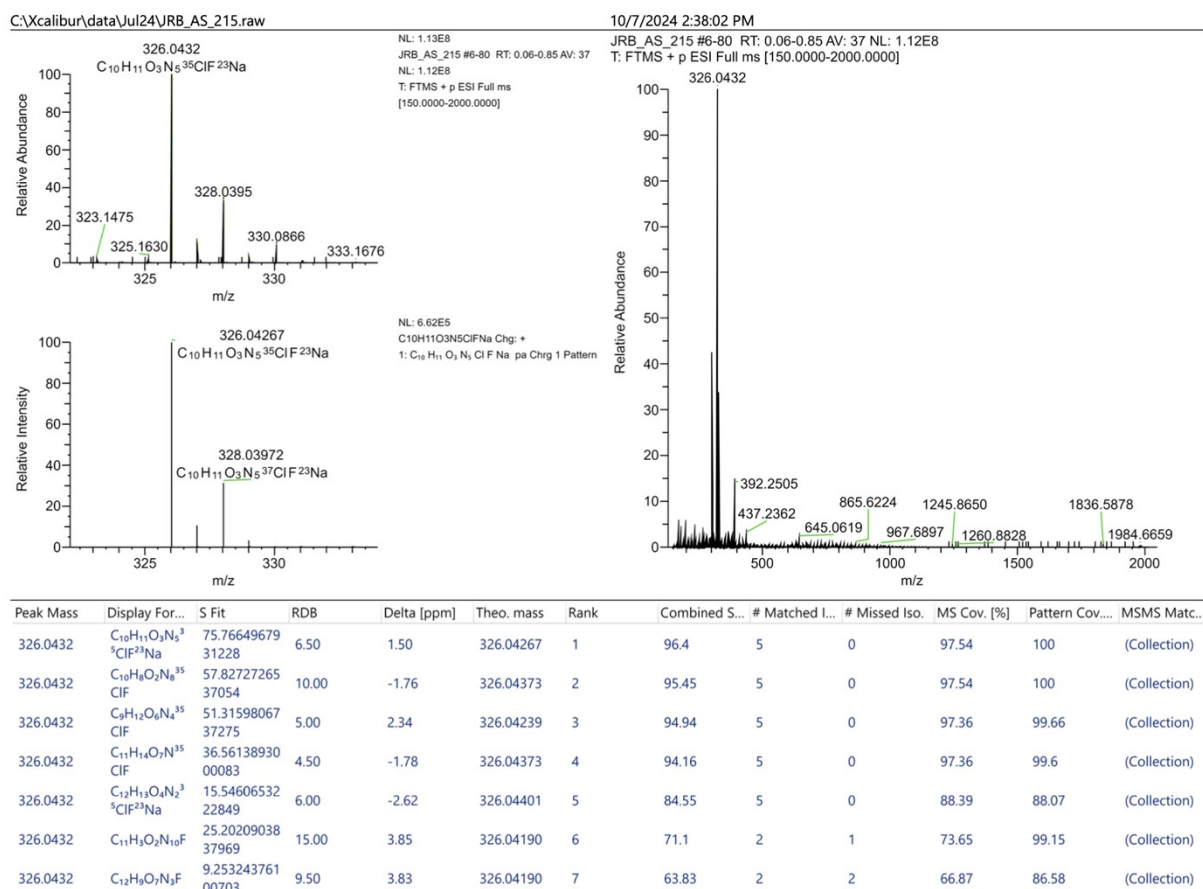

Figure S117 – HRMS of compound 30.



**Sample name:** AraF  
**Description:**  
**Sample amount:** 0.000  
**Sample type:** Sample  
**Instrument:** Shimadzu LC  
**Location:** 1:17  
**Injection date:** 2024-06-25 10:32:06+01:00  
**Injection:** 1 of 1  
**Acq. method:** Transglycosylation run-1.5ml-min.amx  
**Injection volume:** 10.000 µL

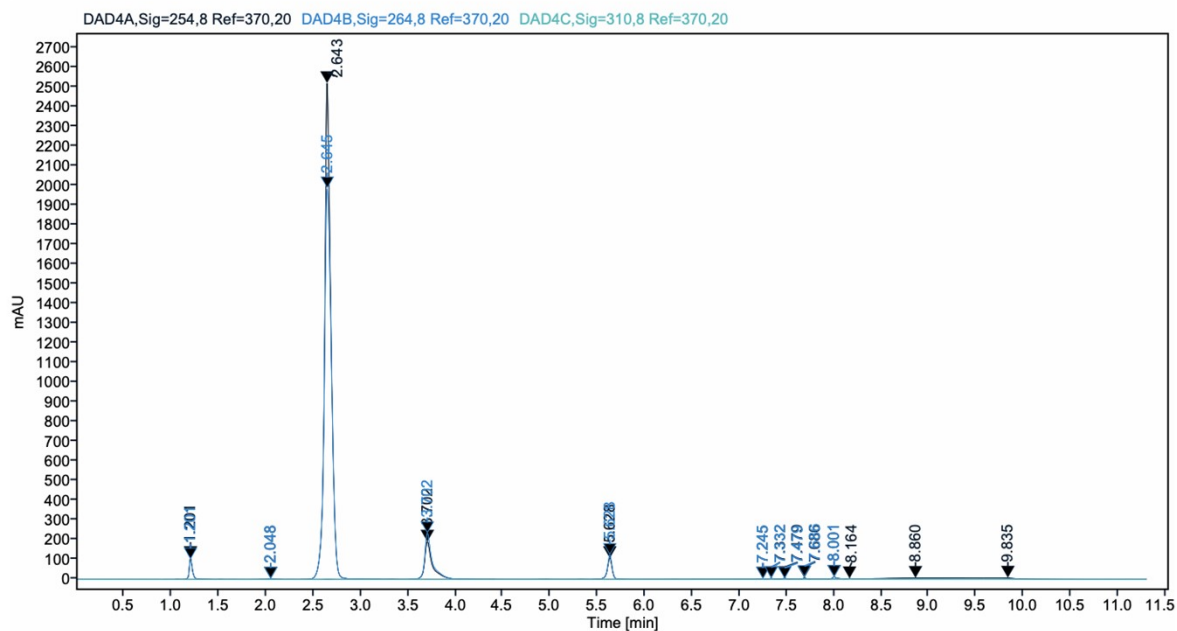

Figure S118 – HPLC trace of the reaction forming compound 30.

### 2',3'-dideoxy-3'-thiothymidine (31)

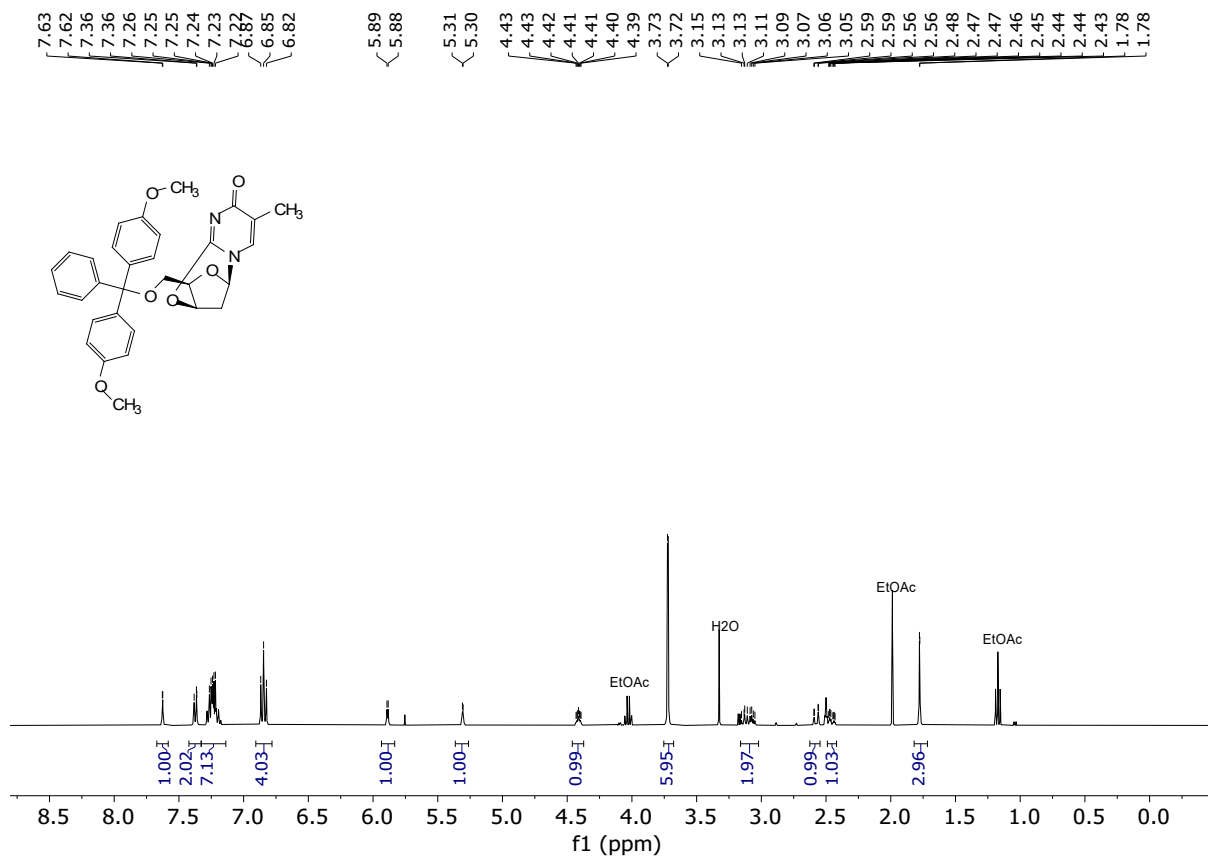

Figure S119 -  $^1\text{H}$  NMR (400 MHz,  $(\text{CD}_3)_2\text{SO}$ ) spectrum of 37.

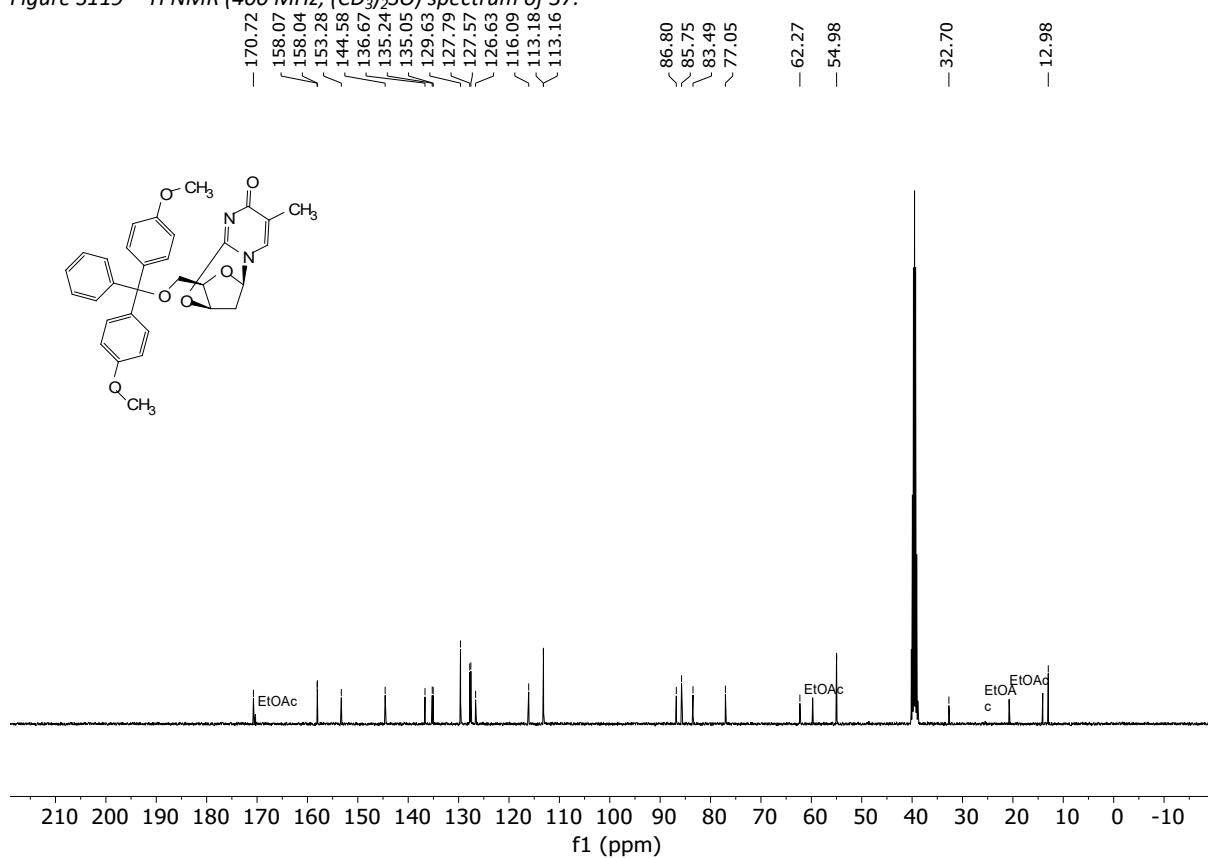

Figure S120 -  $^{13}\text{C}\{^1\text{H}\}$  NMR (101 MHz,  $(\text{CD}_3)_2\text{SO}$ ) spectrum of 37.

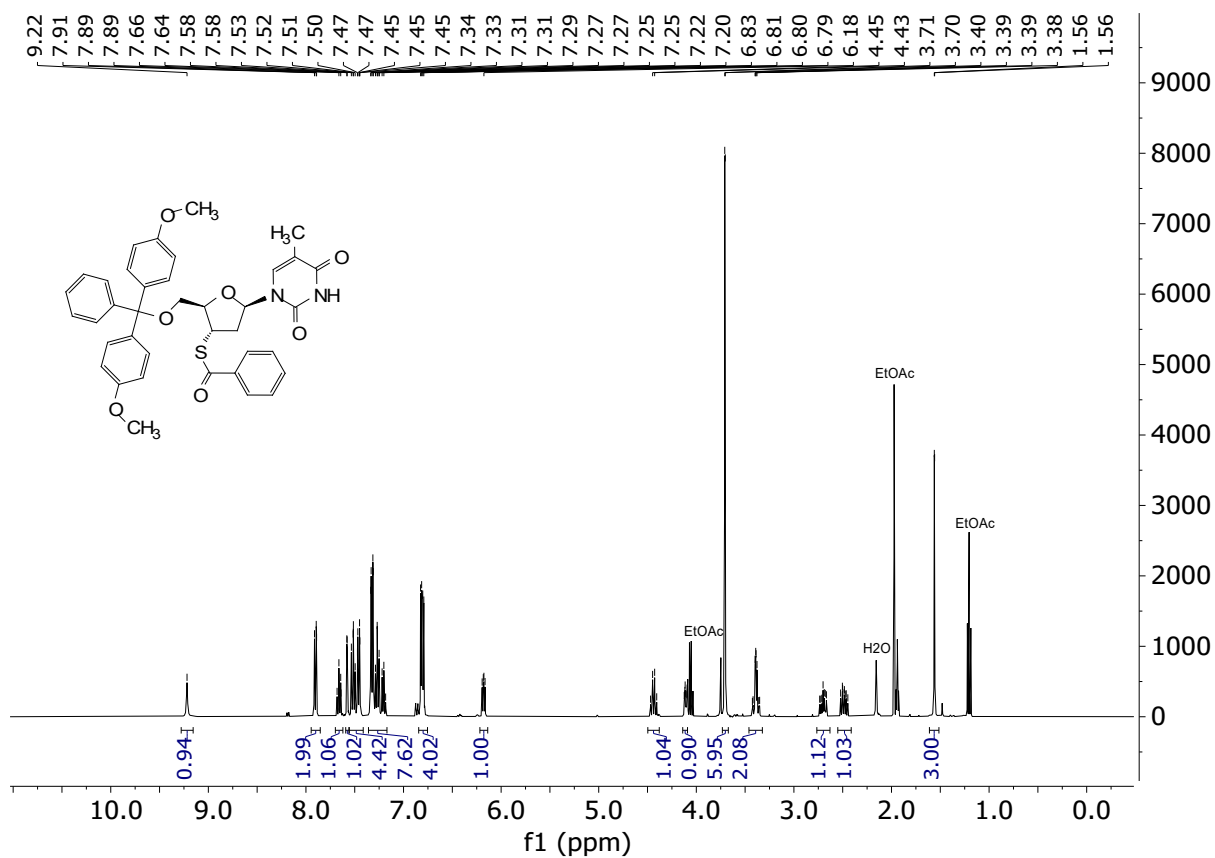

Figure S121 -  $^1\text{H}$  NMR (400 MHz,  $\text{CD}_3\text{CN}$ ) spectrum of 38

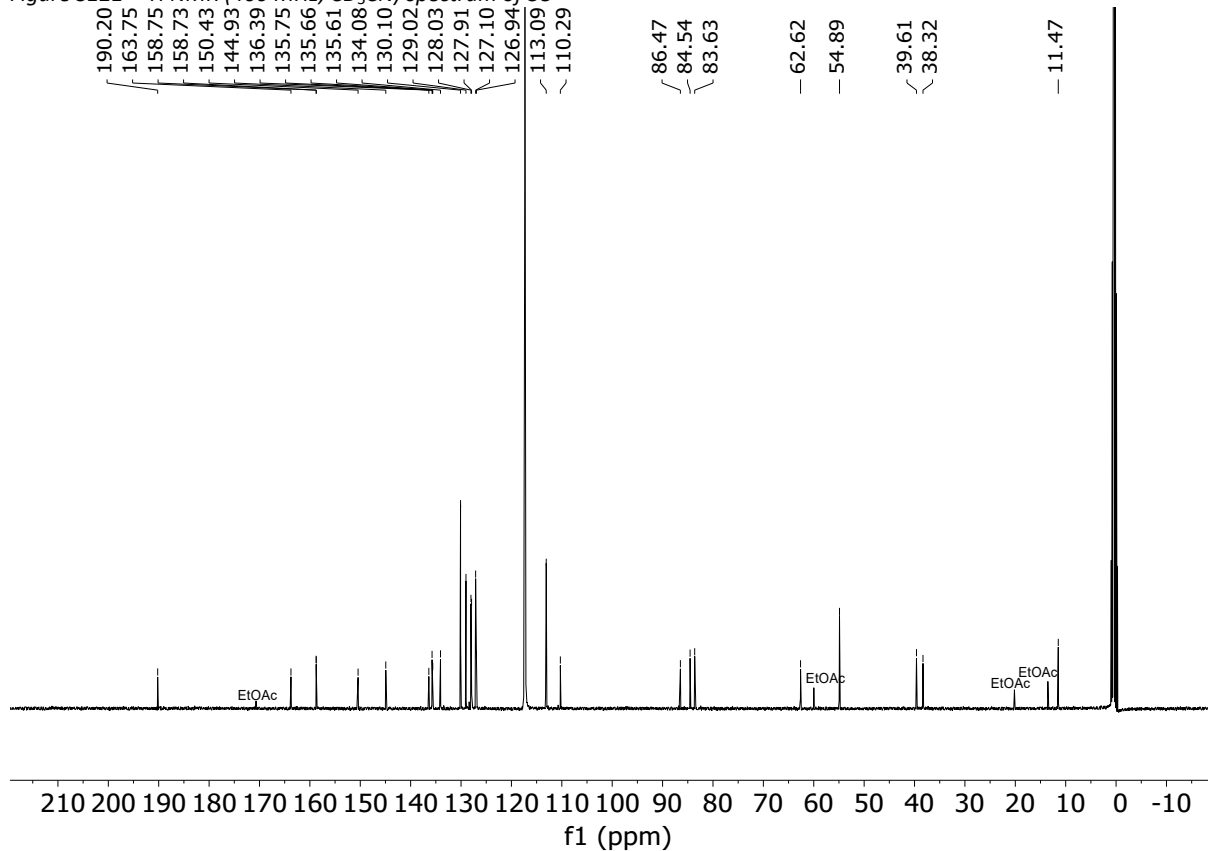

Figure S122 -  $^{13}\text{C}\{^1\text{H}\}$  NMR (101 MHz,  $\text{CD}_3\text{CN}$ ) spectrum of 38.

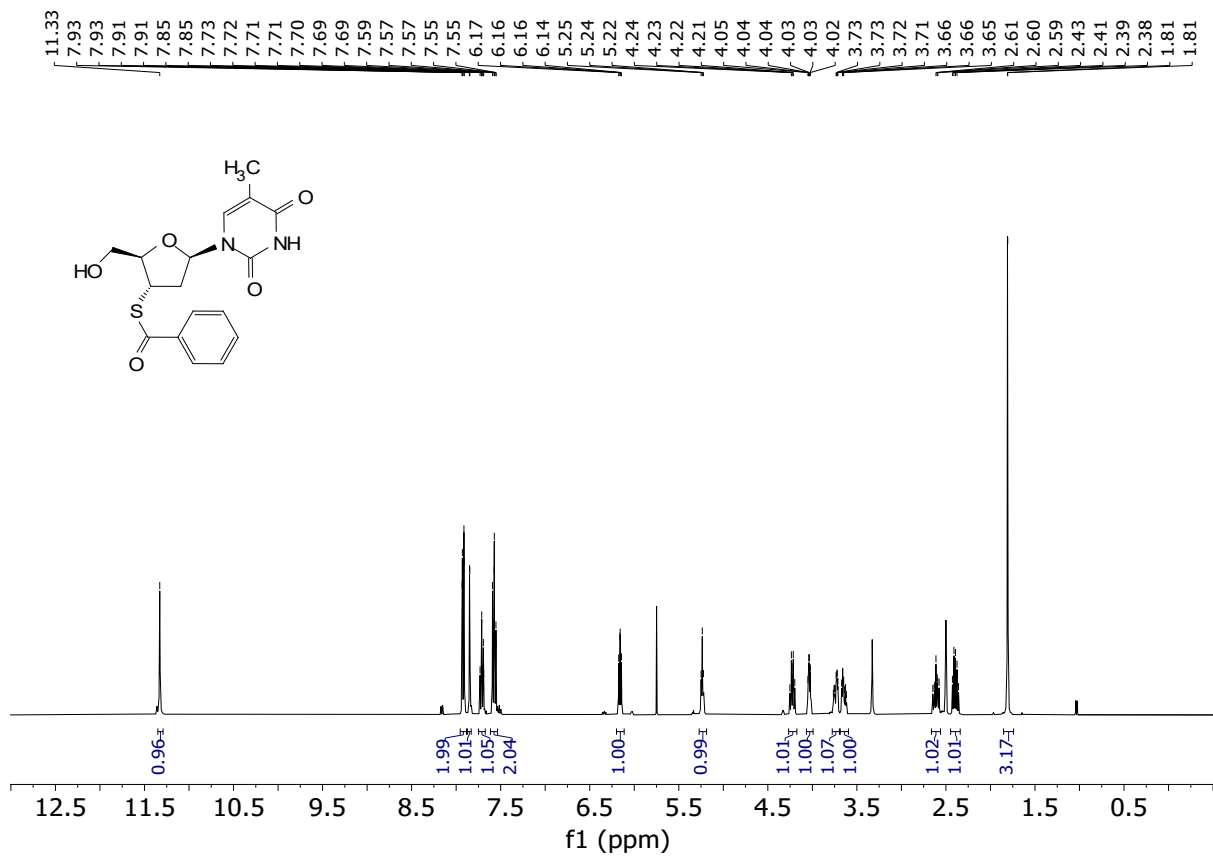

Figure S123 - <sup>1</sup>H NMR (400 MHz, (CD<sub>3</sub>)<sub>2</sub>SO) spectrum of 39.

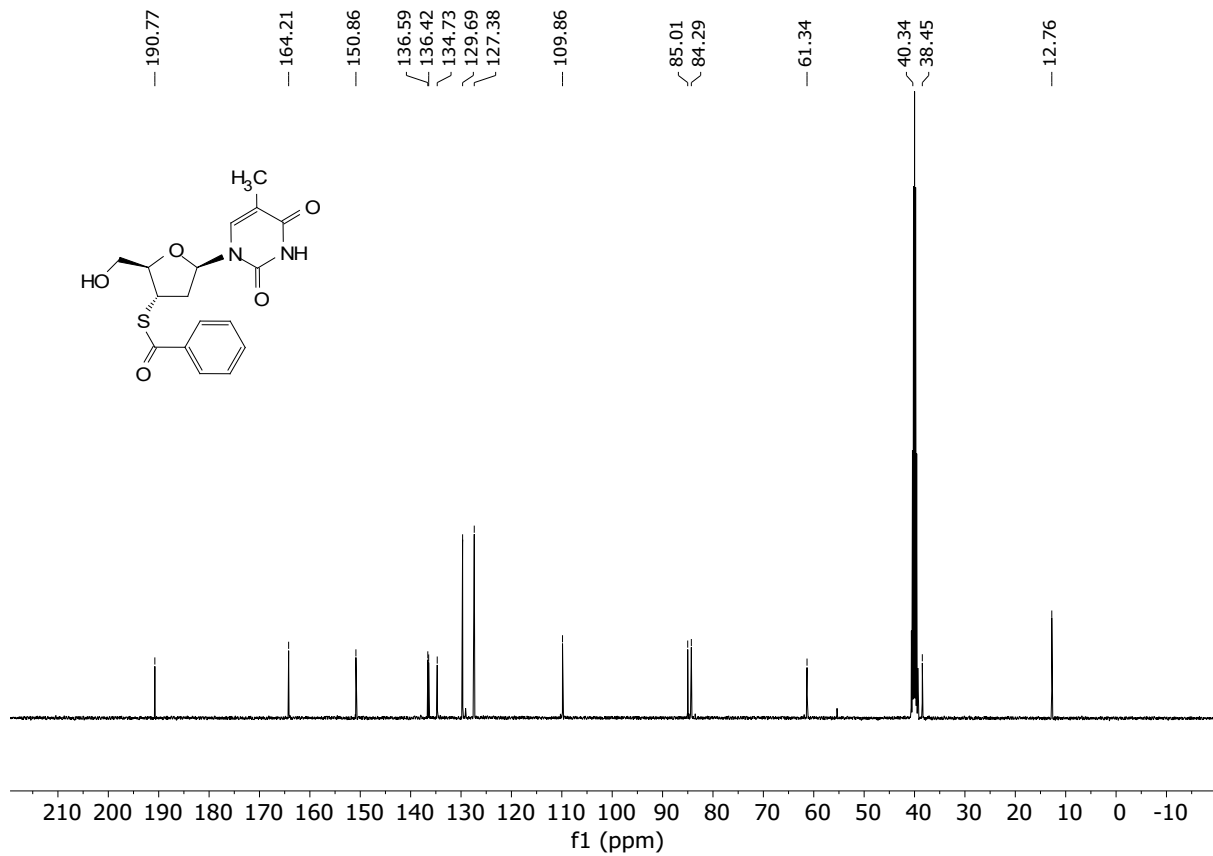

Figure S124 -  $^{13}\text{C}\{^1\text{H}\}$  NMR (101 MHz,  $(\text{CD}_3)_2\text{SO}$ ) spectrum of 39. (Note: chemical shift at 40.34 ppm overlaps with solvent chemical shift pattern.)

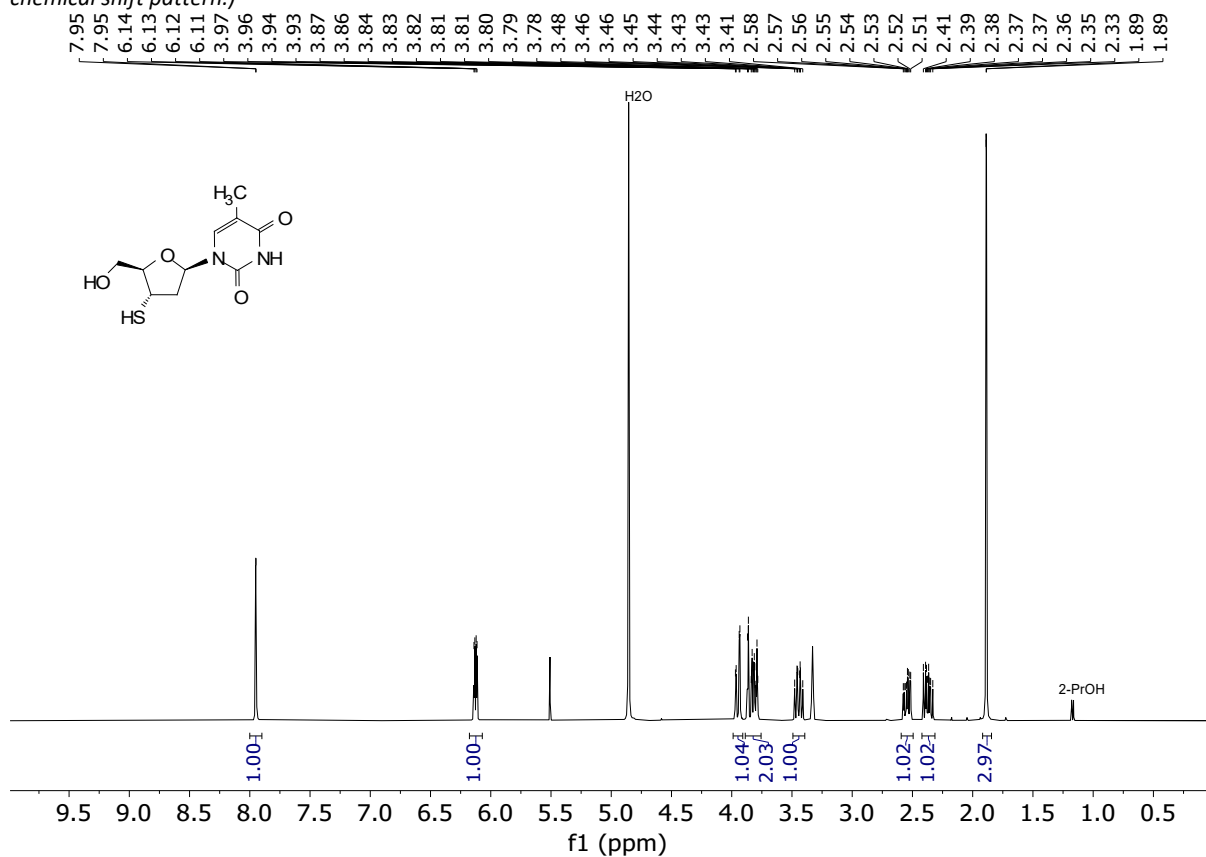

Figure S125 -  $^1\text{H}$  NMR (400 MHz, MeOD) spectrum of 31.

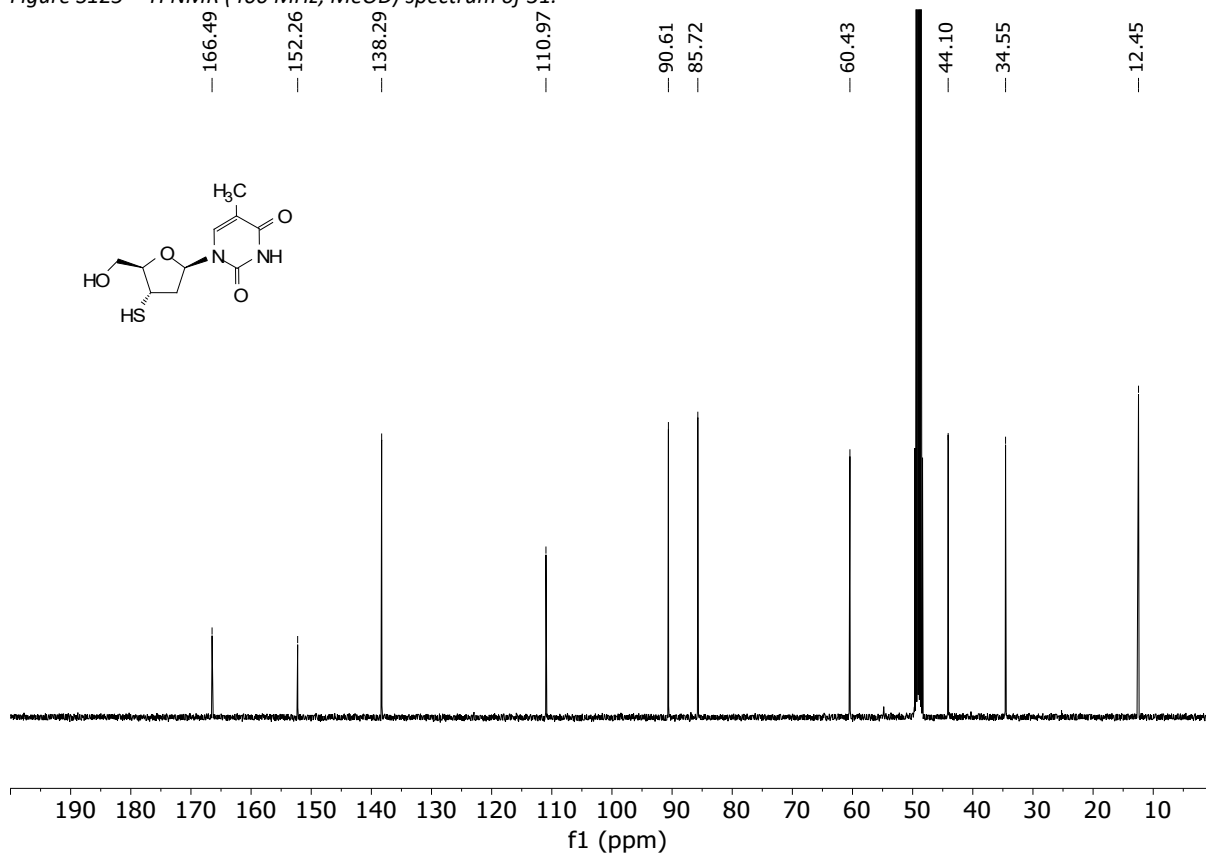

Figure S126 -  $^{13}\text{C}\{^1\text{H}\}$  NMR (101 MHz, MeOD) spectrum of 31.

**2'-amino-2',3'-dideoxyuridine (32)**

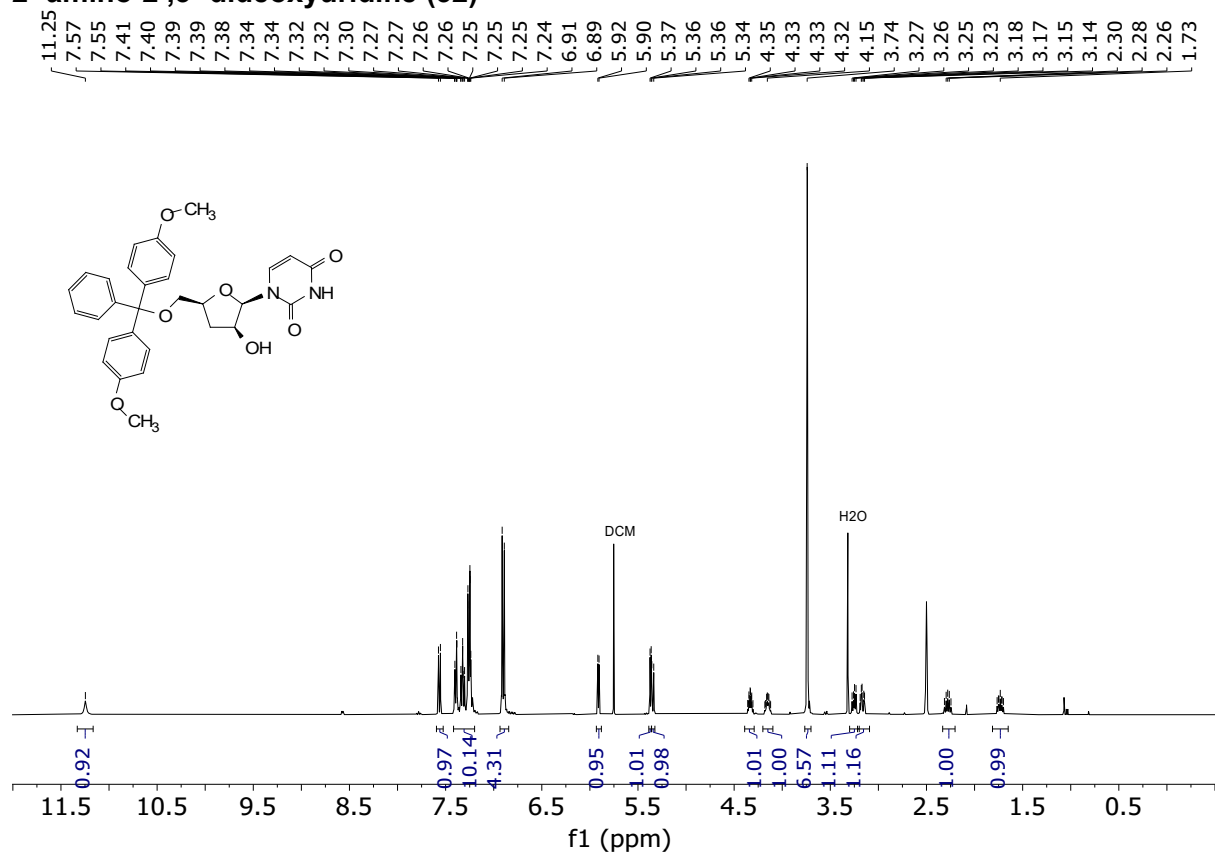

Figure S127 -  $^1\text{H}$  NMR (400 MHz,  $(\text{CD}_3)_2\text{SO}$ ) spectrum of 40.

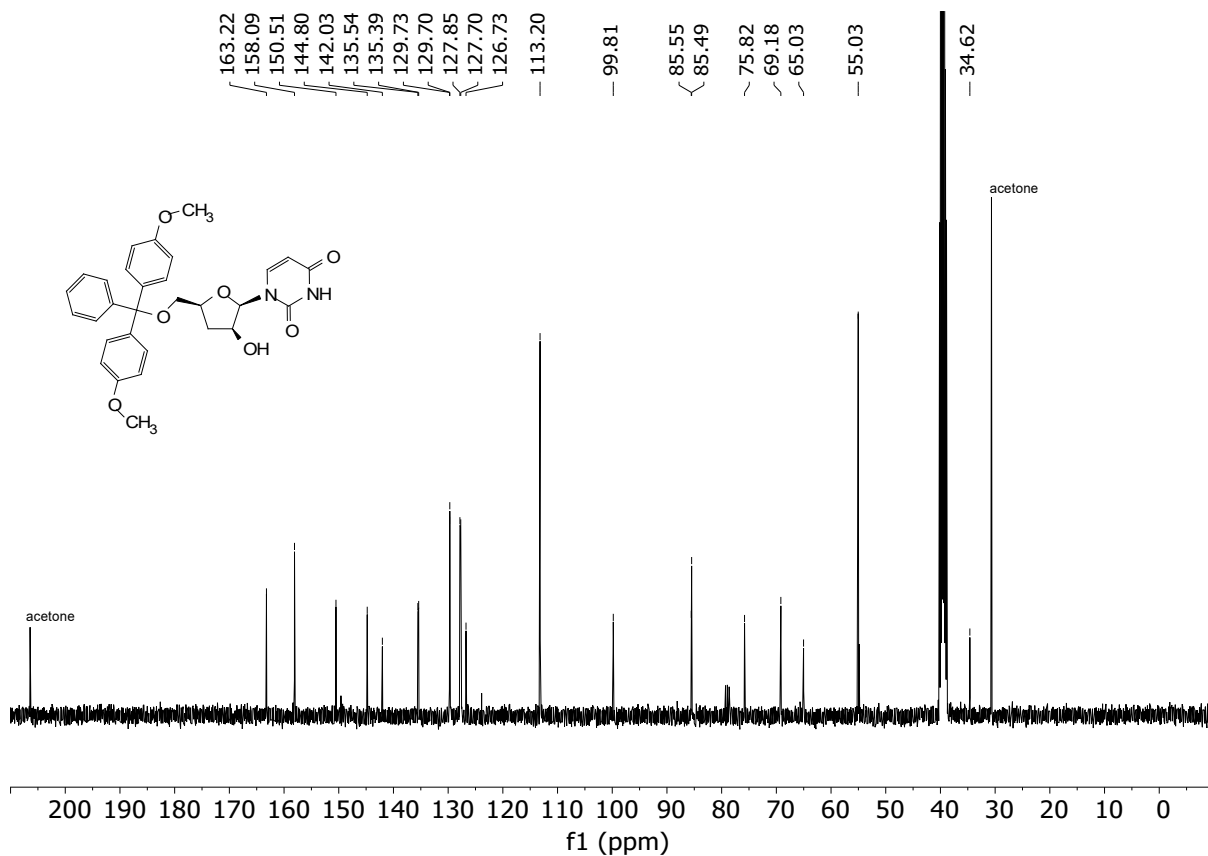

Figure S128 -  $^{13}\text{C}\{^1\text{H}\}$  NMR (101 MHz,  $(\text{CD}_3)_2\text{SO}$ ) spectrum of 40.

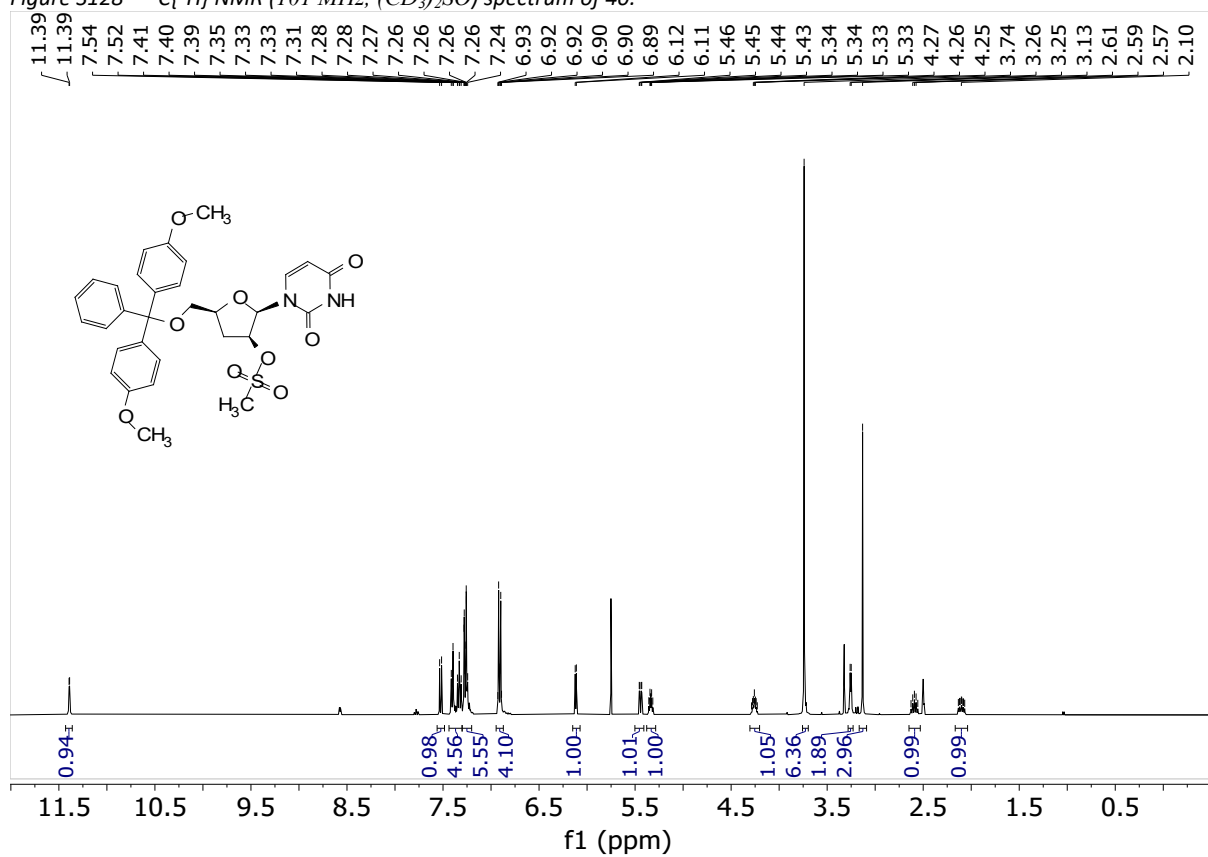

Figure S129 -  $^1\text{H}$  NMR (400 MHz,  $(\text{CD}_3)_2\text{SO}$ ) spectrum of 41.

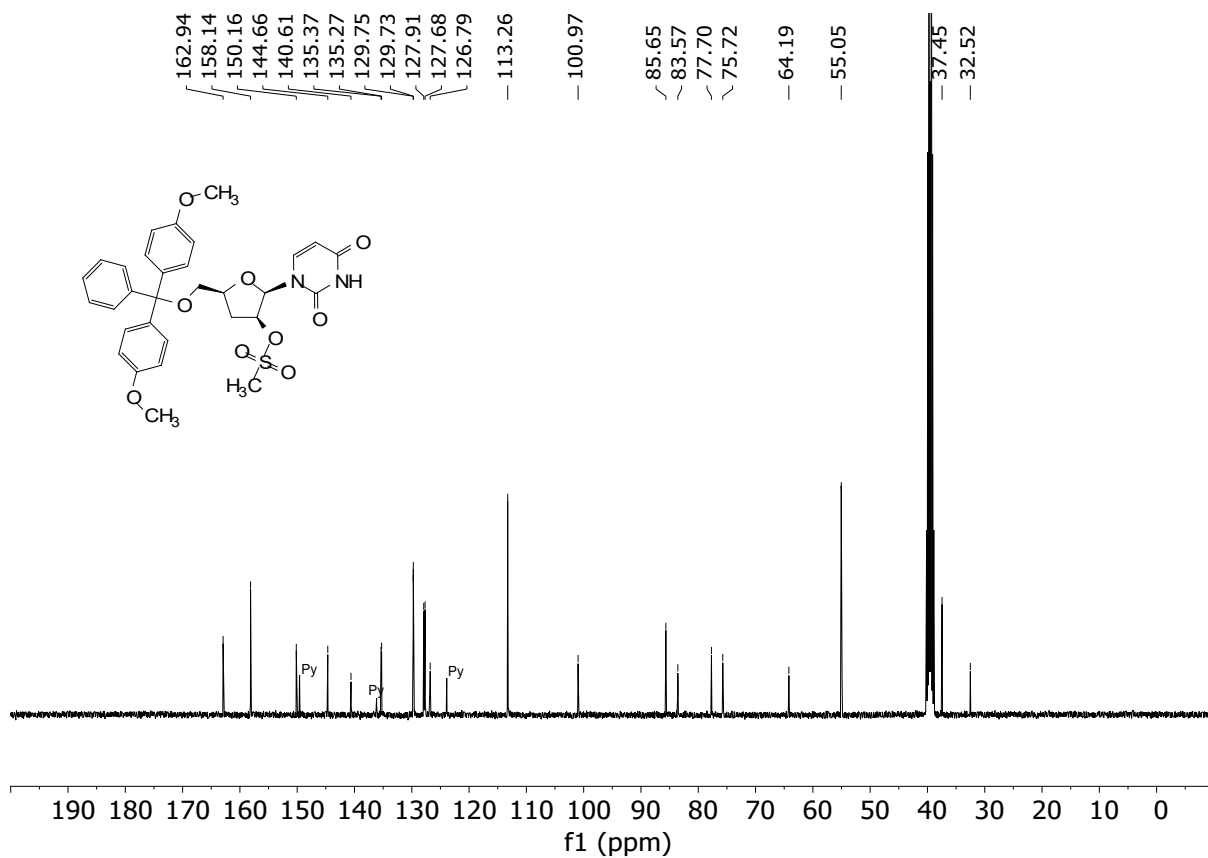

Figure S130 -  $^{13}\text{C}\{^1\text{H}\}$  NMR (101 MHz,  $(\text{CD}_3)_2\text{SO}$ ) spectrum of 41.

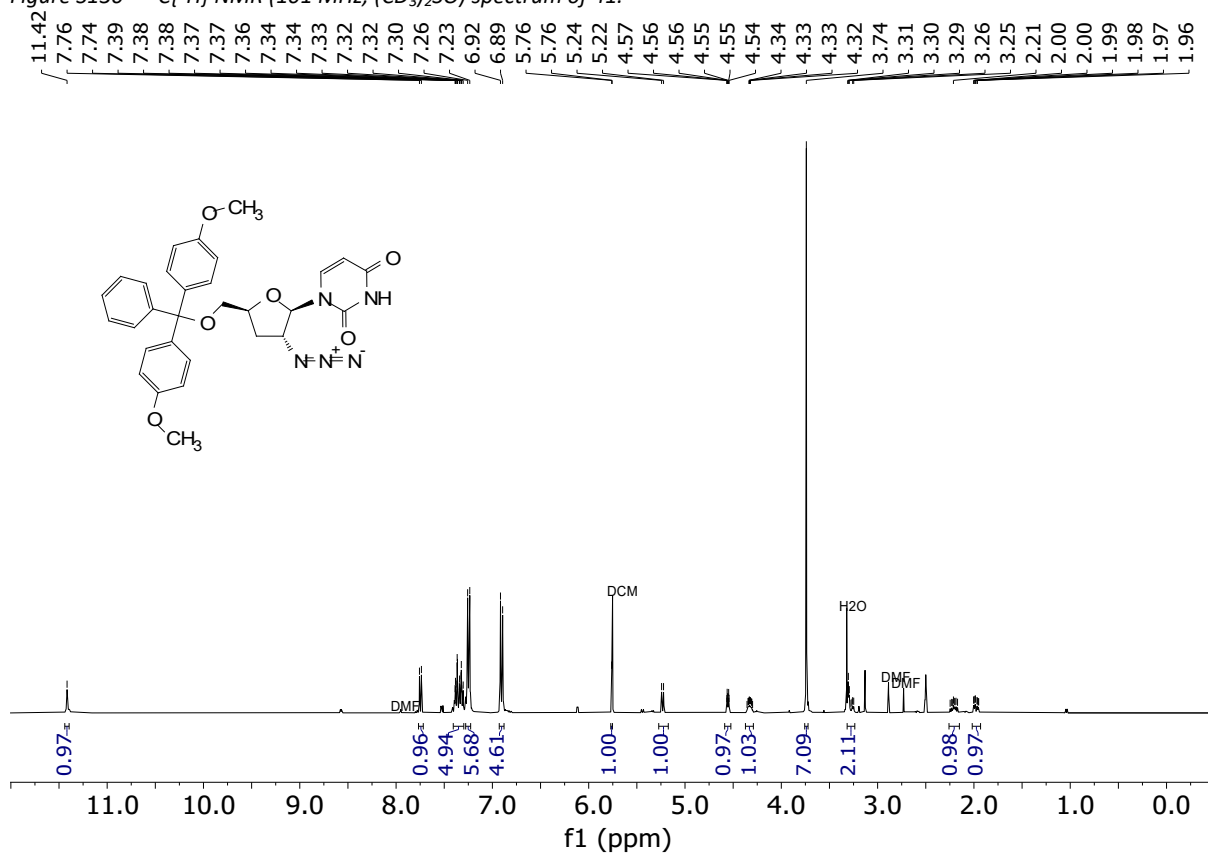

Figure S131 -  $^1\text{H}$  NMR (400 MHz,  $(\text{CD}_3)_2\text{SO}$ ) spectrum of 42.



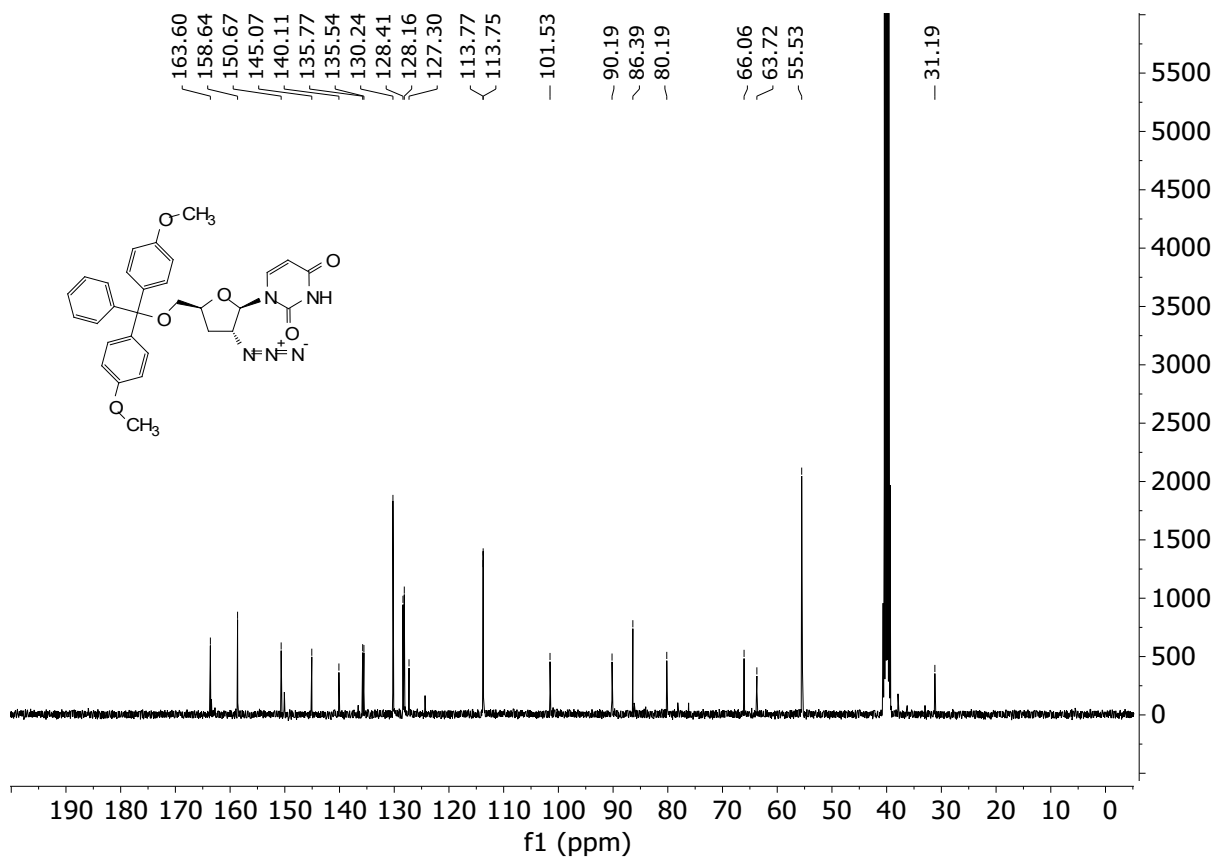

Figure S132 - <sup>13</sup>C{<sup>1</sup>H} NMR (101 MHz, (CD<sub>3</sub>)<sub>2</sub>SO) spectrum of 42.

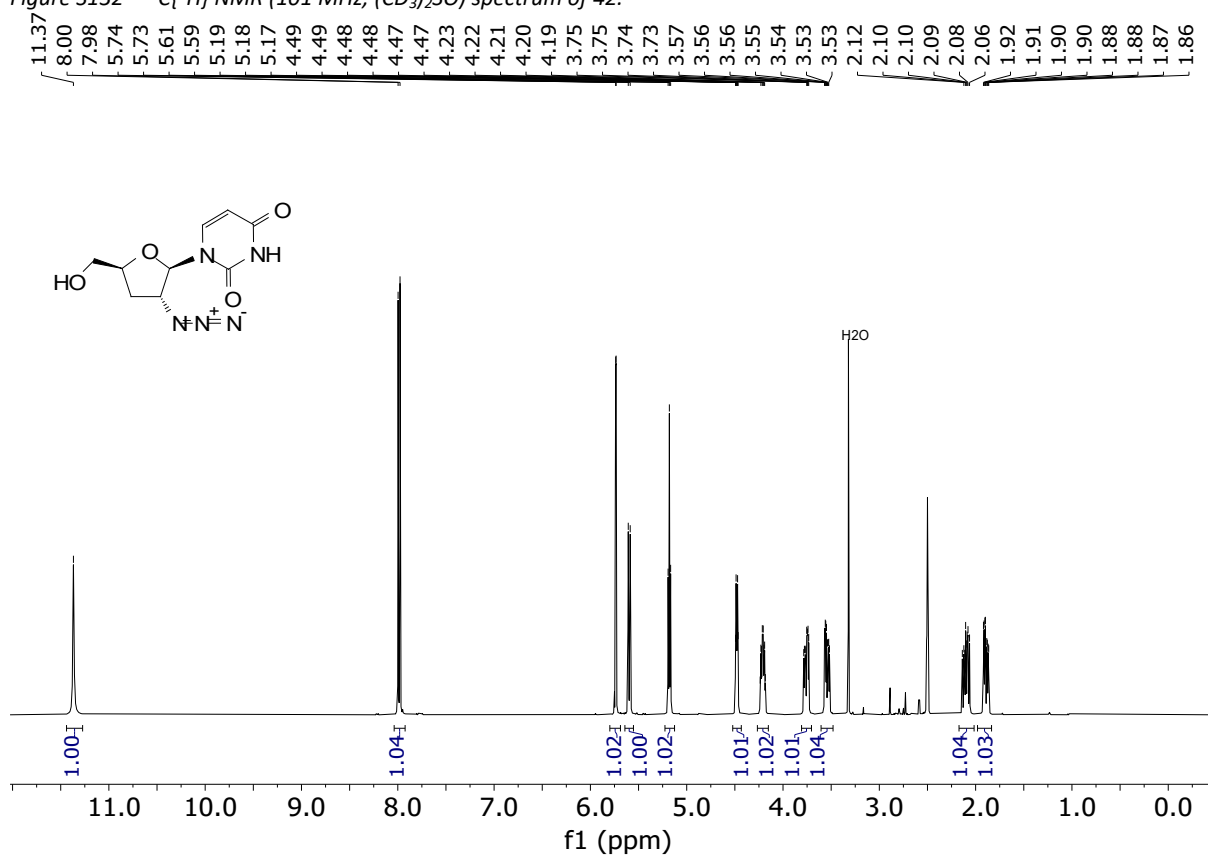

Figure S133 - <sup>1</sup>H NMR (400 MHz, (CD<sub>3</sub>)<sub>2</sub>SO) spectrum of 43.

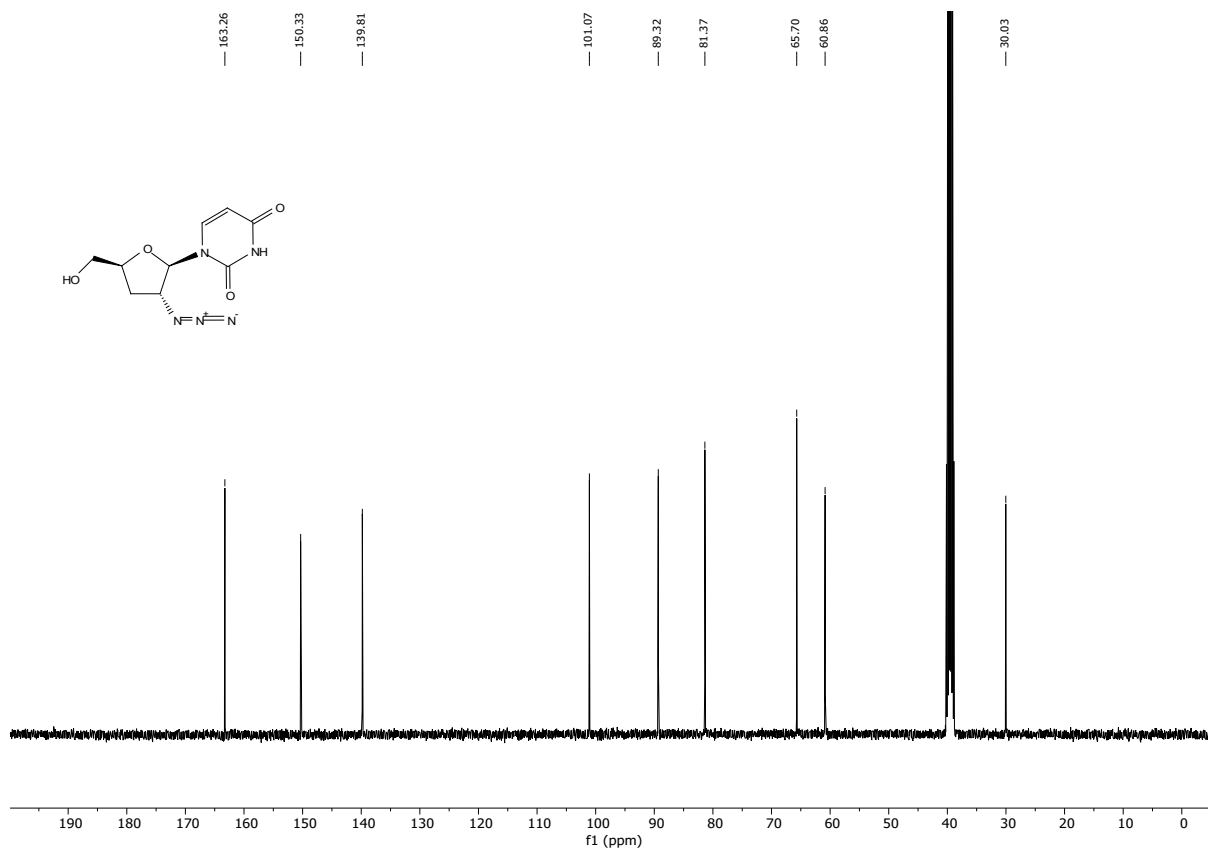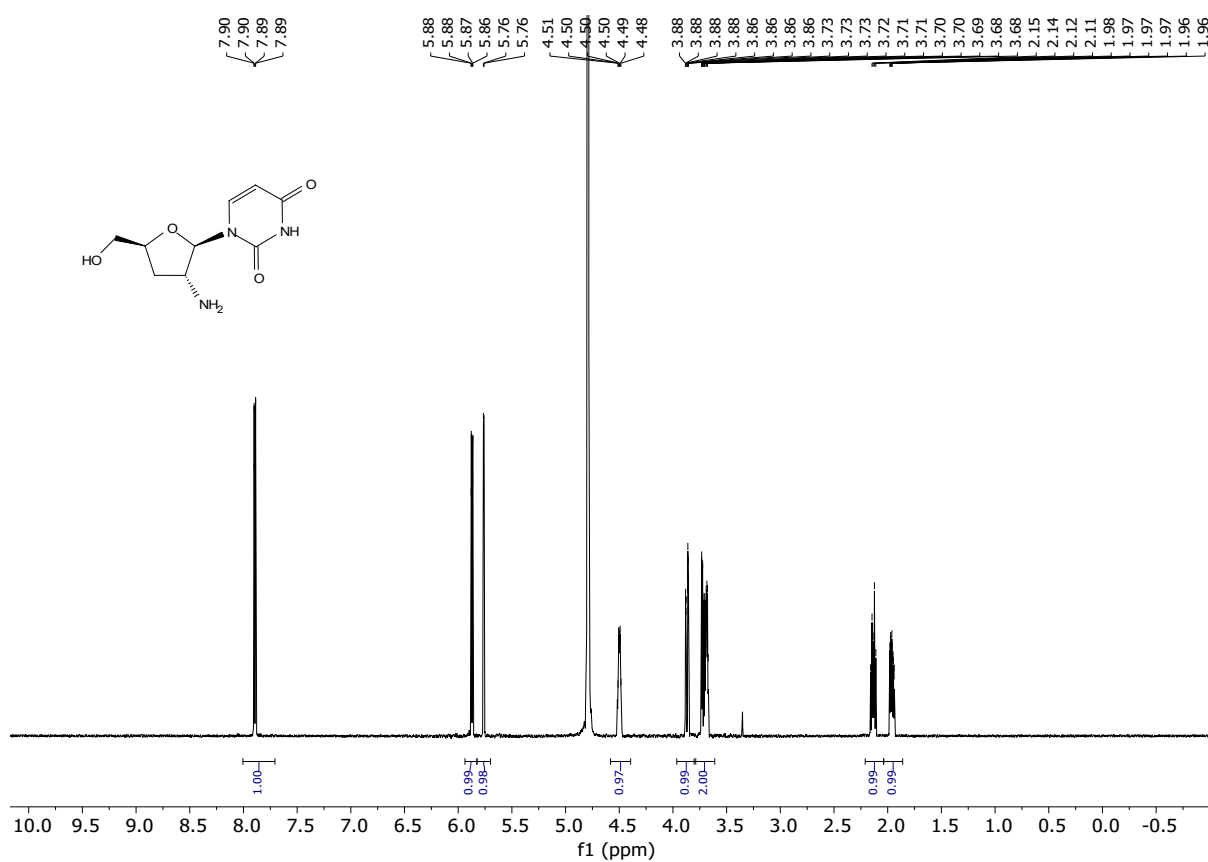

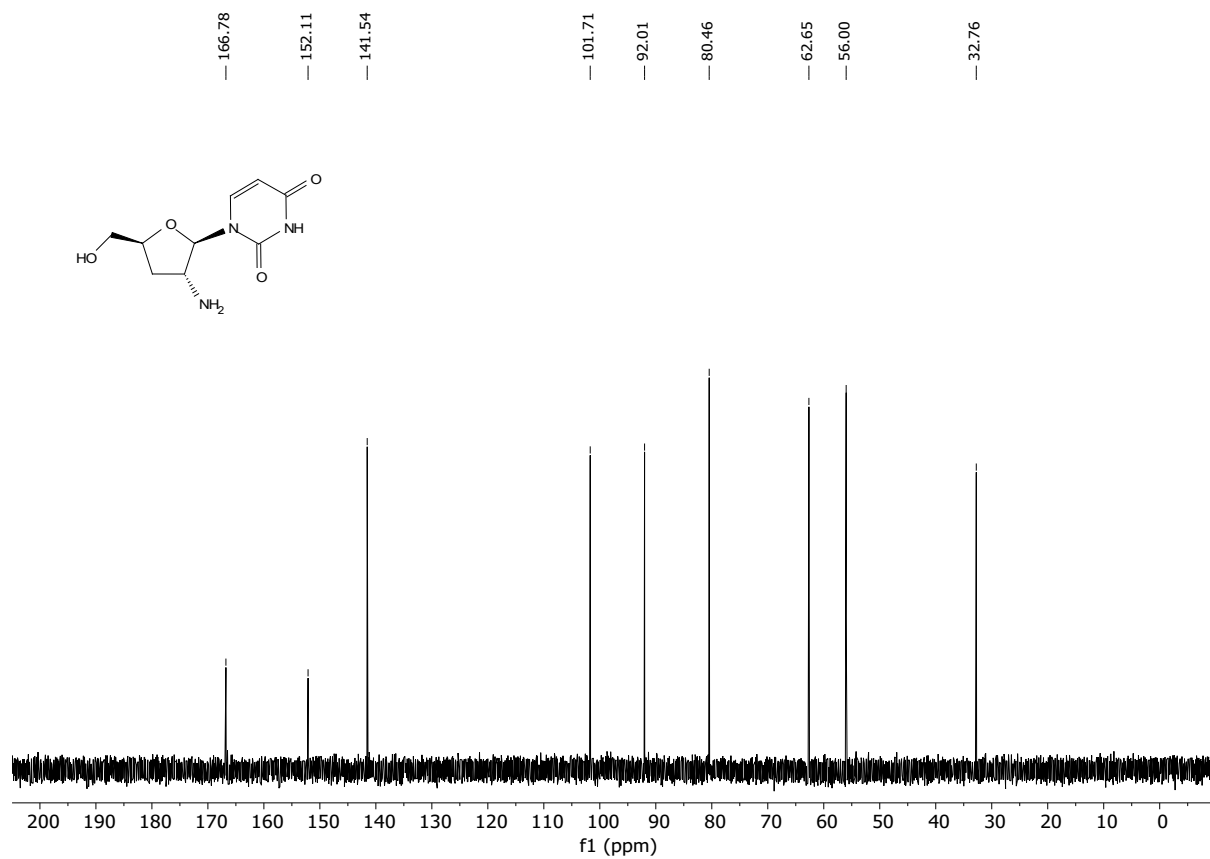

Figure S136 -  $^{13}\text{C}\{^1\text{H}\}$  NMR (151 MHz,  $\text{D}_2\text{O}$ ) spectrum of 32.

### 2'-amino-2'-deoxyuridine (33)

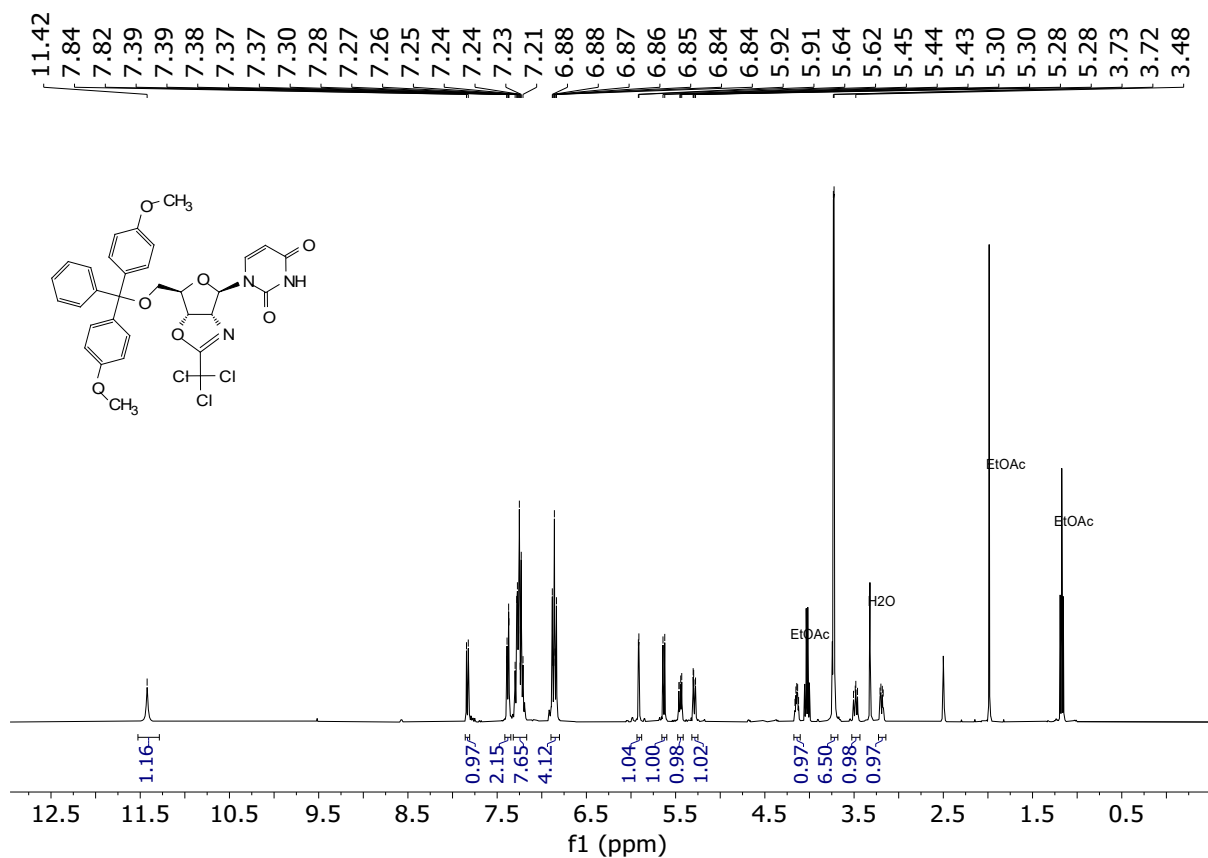

Figure S137 -  $^1\text{H}$  NMR (400 MHz,  $(\text{CD}_3)_2\text{SO}$ ) spectrum of 44.

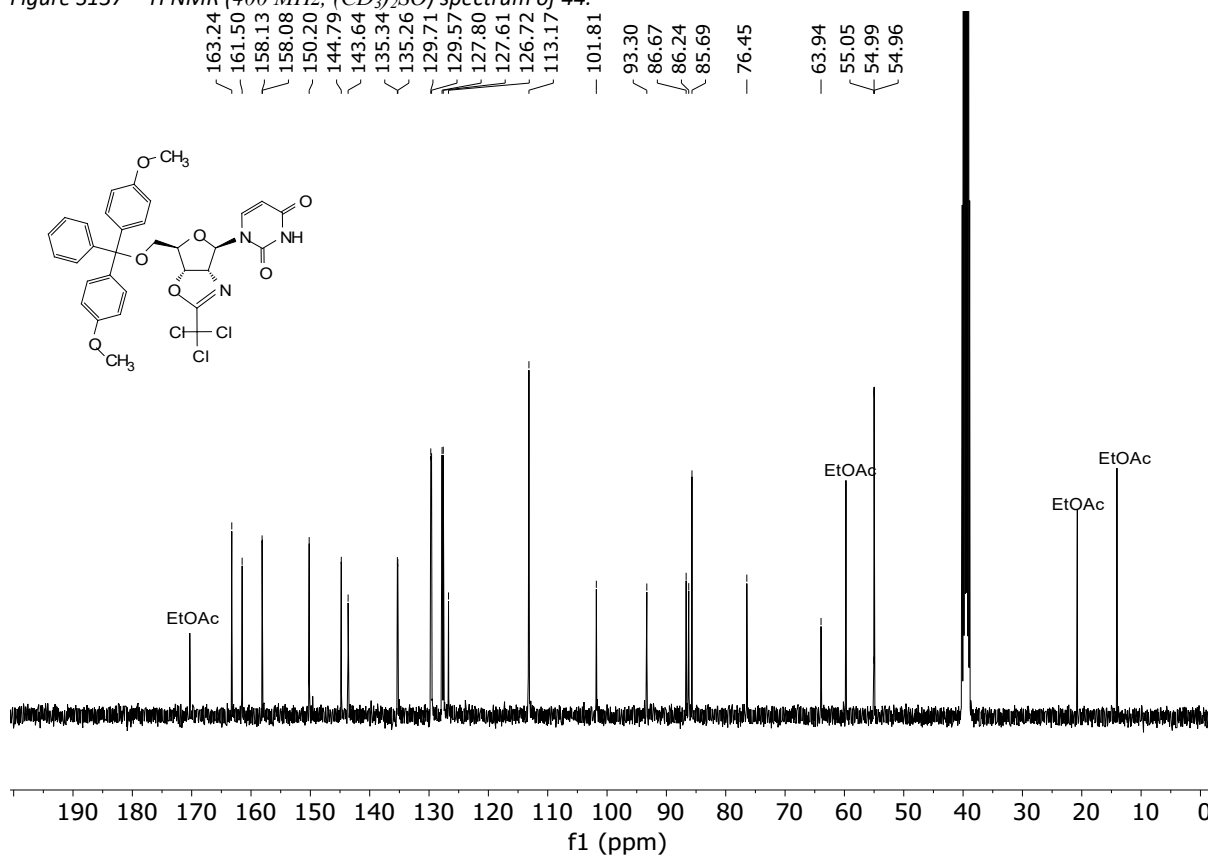

Figure S138 -  $^{13}\text{C}\{^1\text{H}\}$  NMR (101 MHz,  $(\text{CD}_3)_2\text{SO}$ ) spectrum of 44.

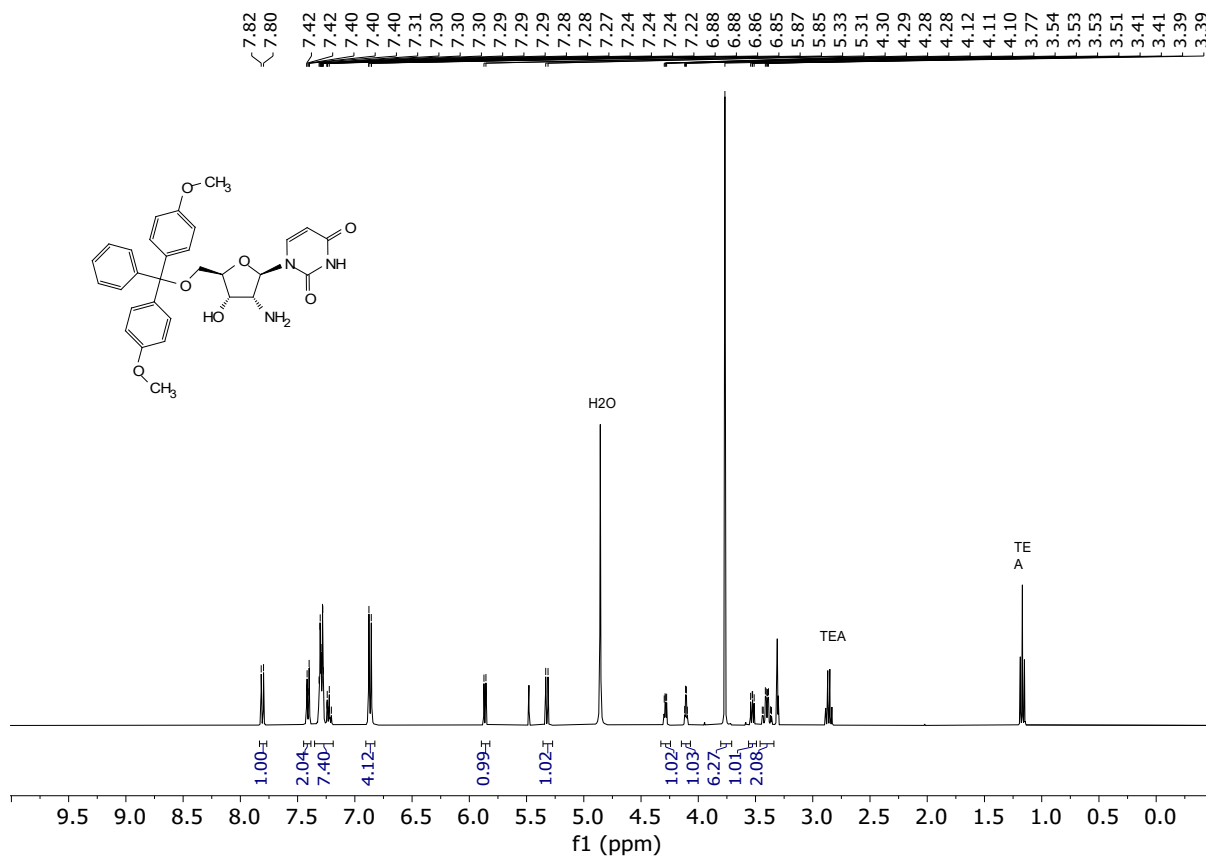

Figure S139 - <sup>1</sup>H NMR (400 MHz, MeOD) spectrum of 45.

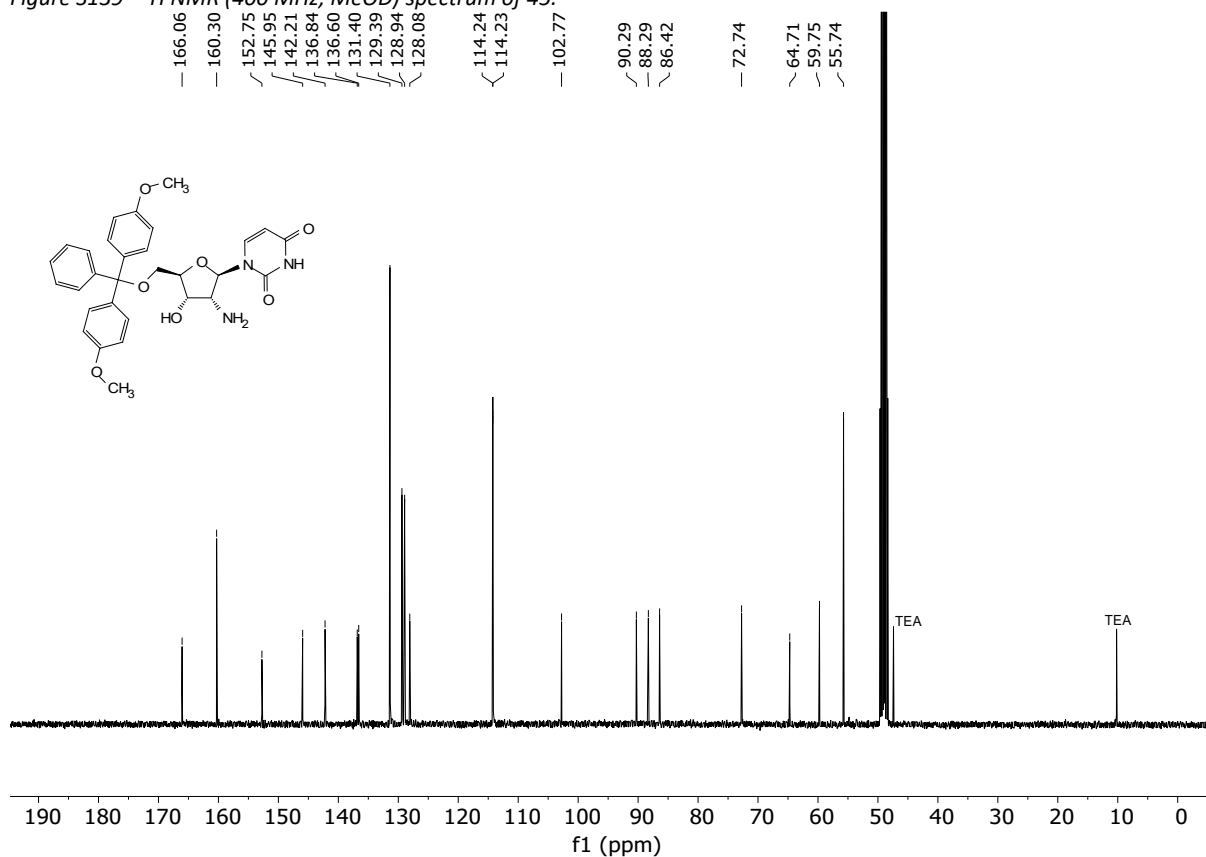

Figure S140 - <sup>13</sup>C NMR (101 MHz, MeOD) spectrum of 45.

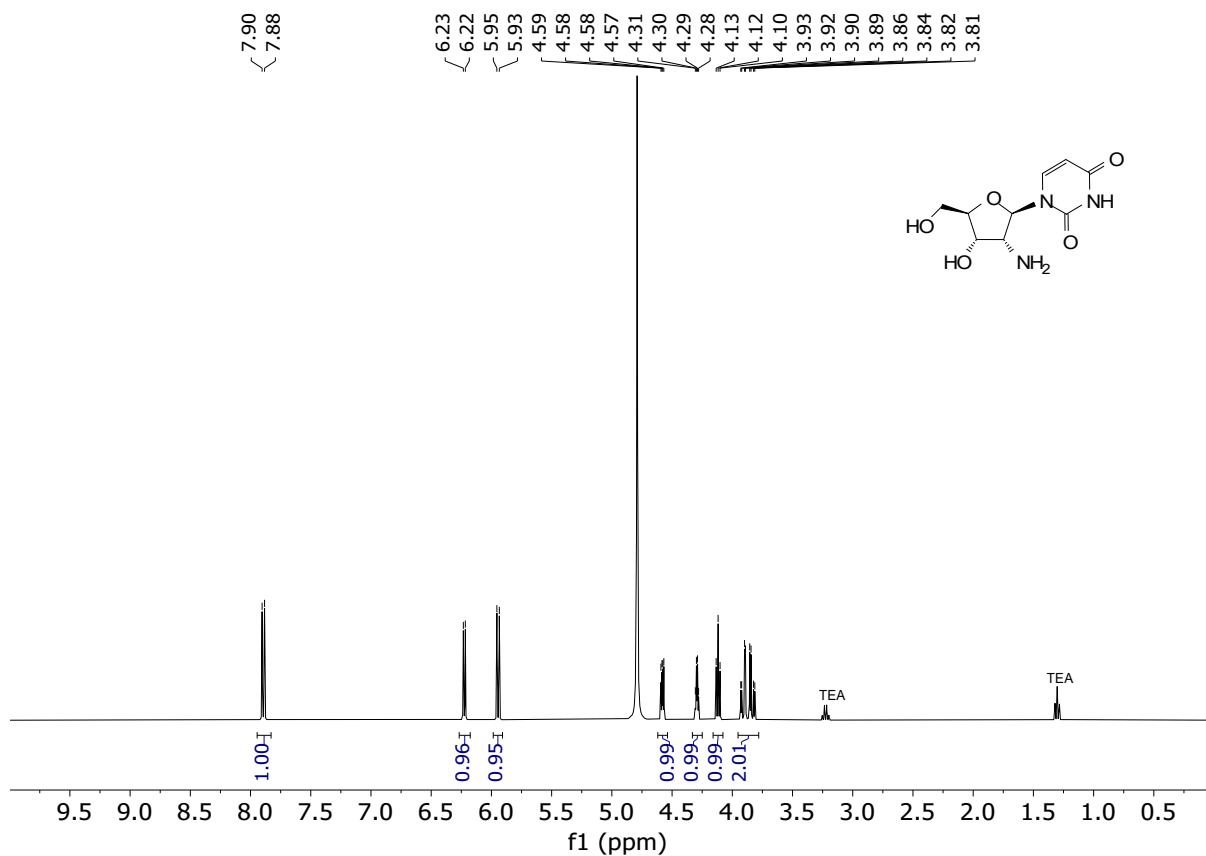

Figure S141 -  $^1\text{H}$  NMR (400 MHz,  $\text{D}_2\text{O}$ ) spectrum of 33.

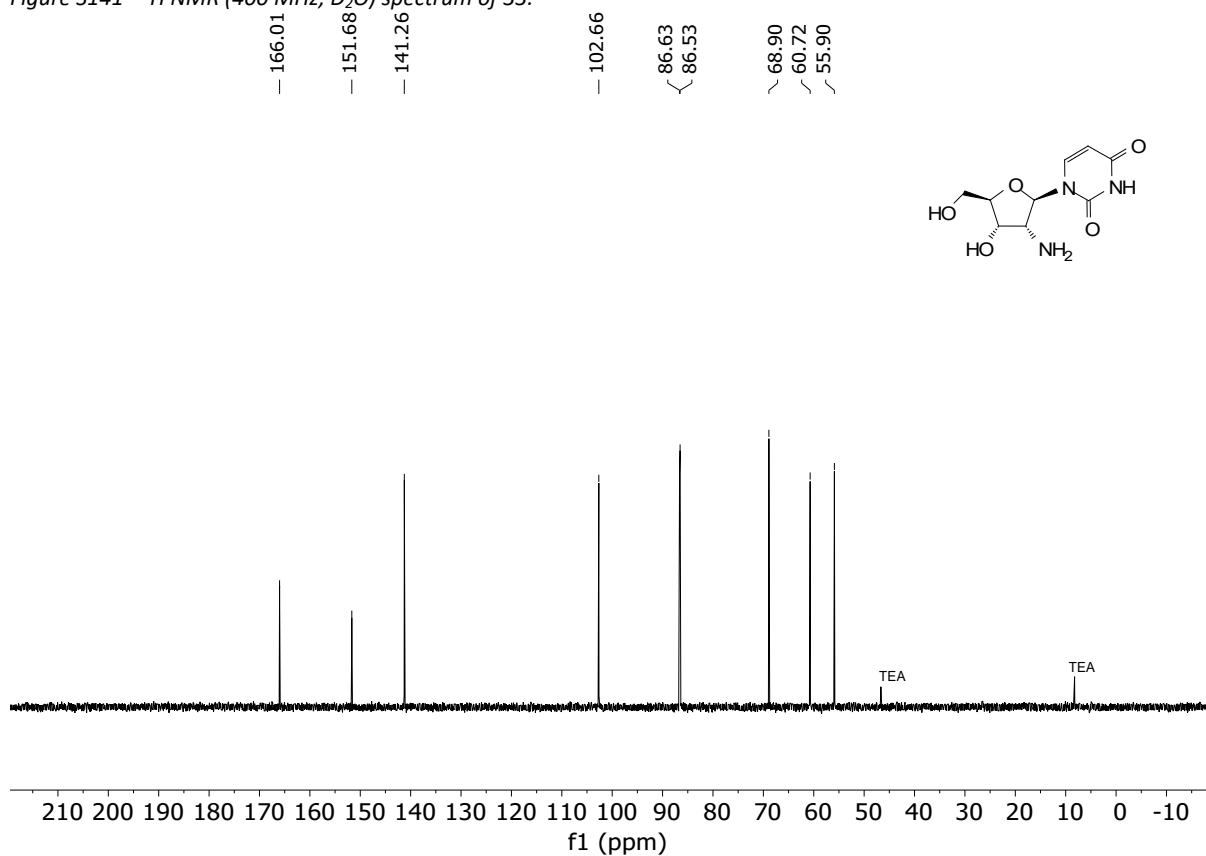

Figure S142 -  $^{13}\text{C}\{^1\text{H}\}$  NMR (101 MHz,  $\text{D}_2\text{O}$ ) spectrum of 33.

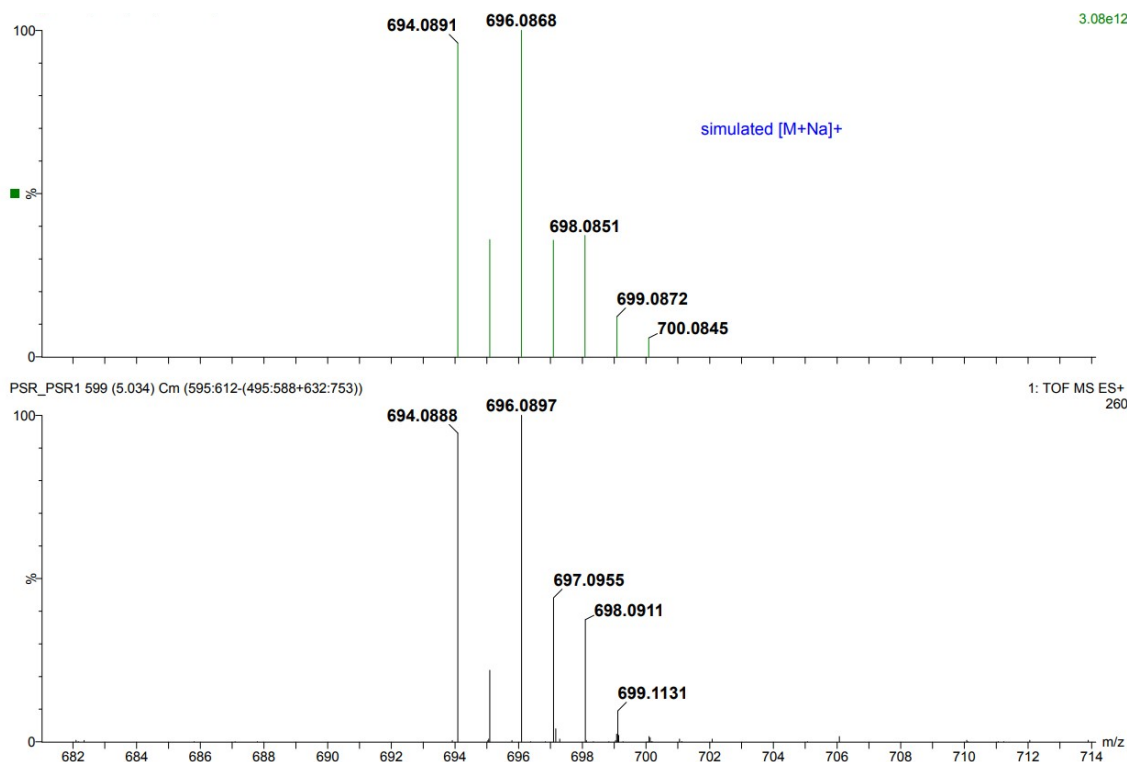

Figure S143 - Simulated and experimental HRMS isotopic pattern measured for 44 ion  $[M+Na]^+$ .

## 8. References

- (1) Downey, A. M.; Richter, C.; Pohl, R.; Mahrwald, R.; Hocek, M. Direct One-Pot Synthesis of Nucleosides from Unprotected or 5-O-Monoprotected D-Ribose. *Org Lett* **2015**, *17*, 4604-4607.
- (2) Mikhailopoulo, I. A.; Kalinichenko, E. N.; Podkopaeva, T. L.; Wenzel, T.; Rosemeyer, H.; Seela, F. L. Synthesis of 1-Deazaadenosine Analogues of (2'→5') ApApA. *Nucleosides and Nucleotides* **2006**, *15*, 445-464.
- (3) Shet, H.; Patel, M.; Waikar, J. M.; More, P. M.; Sanghvi, Y. S.; Kapdi, A. R. Room-Temperature Dialkylamination of Chloroheteroarenes Using a Cu(II)/PTABS Catalytic System. *Chem Asian J* **2023**, *18*, e202201006.
- (4) Seitz, F.; Jungnickel, T.; Kleiber, N.; Kretschmer, J.; Dietzsch, J.; Adelman, J.; Bohnsack, K. E.; Bohnsack, M. T.; Höbartner, C. Atomic Mutagenesis of N6-Methyladenosine Reveals Distinct Recognition Modes by Human m6A Reader and Eraser Proteins. *Journal of the American Chemical Society* **2024**, *146*, 7803-7810.
- (5) Gundersen, L.-L.; Brændvang, M. A Novel Method for the Introduction of Fluorine into the Purine 2-Position: Synthesis of 2-Fluoroadenosine and a Formal Synthesis of the Antileukemic Drug Fludarabine. *Synthesis* **2006**, *2006*, 2993-2995.
- (6) Yasumoto, M.; Moriyama, A.; Unemi, N.; Hashimoto, S.; Suzue, T. Studies of antitumor agents. 1. Resolution of racemic 1-(tetrahydro-2-furanyl)-k-fluorouracil into the R and S isomers and examination of the biological activities of the isomers. *J Med Chem* **1977**, *20*, 1592-1594.
- (7) Takatsuki, K.; Ohgushi, S.; Kohmoto, S.; Kishikawa, K.; Yamamoto, M. A simple and efficient synthesis of puromycin, 2,2'-anhydro-pyrimidine nucleosides, cytidines and 2',3'-

- anhydroadenosine from 3',5'-O-sulfinyl xylo-nucleosides. *Nucleosides Nucleotides Nucleic Acids* **2006**, *25*, 719-734.
- (8) Beasley, S.; Nguyen, K.; Fazio, M.; Spitale, R. C. Protected pyrimidine nucleosides for cell-specific metabolic labeling of RNA. *Tetrahedron Lett* **2018**, *59*, 3912-3915.
- (9) Leszczynska, G.; Leonczak, P.; Wozniak, K.; Malkiewicz, A. Chemical synthesis of the 5-taurinomethyl(-2-thio)uridine modified anticodon arm of the human mitochondrial tRNA(Leu(UUR)) and tRNA(Lys). *RNA* **2014**, *20*, 938-947.
- (10) Thomas, H. J.; Tiwari, K. N.; Clayton, S. J.; Secrist, J. A.; Montgomery, J. A. Synthesis and Biologic Activity of Purine 2'-Deoxy-2'-fluoro-ribonucleosides. *Nucleosides and Nucleotides* **1994**, *13*, 309-323.
- (11) Montgomery, J. A.; Shortnacy-Fowler, A. T.; Clayton, S. D.; Riordan, J. M.; Secrist, J. A., 3rd. Synthesis and biologic activity of 2'-fluoro-2'-halo derivatives of 9-beta-D-arabinofuranosyladenine. *J Med Chem* **1992**, *35*, 397-401.
- (12) Kabsch, W. XDS. *Acta Crystallographica Section D* **2010**, *66*, 125-132.
- (13) Evans, P. Scaling and assessment of data quality. *Acta Crystallogr D Biol Crystallogr* **2006**, *62*, 72-82.
- (14) Winter, G. xia2: an expert system for macromolecular crystallography data reduction. *Journal of Applied Crystallography* **2010**, *43*, 186-190.
- (15) Vagin, A.; Teplyakov, A. MOLREP: an Automated Program for Molecular Replacement. *Journal of Applied Crystallography* **1997**, *30*, 1022-1025.
- (16) Armstrong, S.; Cook, W. J.; Short, S. A.; Ealick, S. E. Crystal structures of nucleoside 2-deoxyribosyltransferase in native and ligand-bound forms reveal architecture of the active site. *Structure* **1996**, *4*, 97-107.
- (17) Emsley, P.; Cowtan, K. Coot: model-building tools for molecular graphics. *Acta Crystallogr D Biol Crystallogr* **2004**, *60*, 2126-2132.
- (18) Murshudov, G. N.; Vagin, A. A.; Dodson, E. J. Refinement of macromolecular structures by the maximum-likelihood method. *Acta Crystallogr D Biol Crystallogr* **1997**, *53*, 240-255.
- (19) Gaynor, J. W.; Brazier, J.; Cosstick, R. Synthesis of 3'-S-phosphorothiolate oligonucleotides for their potential use in RNA interference. *Nucleosides Nucleotides Nucleic Acids* **2007**, *26*, 709-712.
- (20) Kawana, M.; Kuzuhara, H. General method for the synthesis of 2'-azido-2',3'-dideoxynucleosides by the use of [1,2]-hydride shift and  $\beta$ -elimination reactions. *J. Chem. Soc., Perkin Trans. 1* **1992**, 469-478.
- (21) McGee, D. P.; Vaughn-Settle, A.; Vargeese, C.; Zhai, Y. 2'-Amino-2'-deoxyuridine via an Intramolecular Cyclization of a Trichloroacetimidate. *J Org Chem* **1996**, *61*, 781-785.
